# Supplementary material for: Chiral lithium amide mediated desymmetrization of 3-substituted cyclobutanone
Source: Royal Society of Chemistry journal article supplement (doi:10.1039/d1qo00015b), 2021-01-01
Supplement: d1qo00015b1.pdf [file d1qo00015b1.pdf]

# Chiral Lithium Amide Mediated Desymmetrization of 3-Substituted Cyclobutanone

Changxu Zhong, Shaowei Wang, Ping Lu\*

Research Center for Molecular Recognition and Synthesis, Department of Chemistry

Fudan University, 220 Handan Lu, Shanghai 200433, P. R. China

## Supporting Information

|                                                                                      |     |
|--------------------------------------------------------------------------------------|-----|
| 1. Lithium Chiral amide mediated deprotonation of 4- <i>tert</i> -butylcyclohexanone | S2  |
| 2. Experiment procedure and characterization data                                    | S3  |
| 3. Copies of $^1\text{H}$ , $^{13}\text{C}$ NMR spectra and HPLC traces              | S33 |

## General Information.

All reactions were carried out under an inert atmosphere of dry argon in oven or flame-dried glassware, unless the reaction procedure states otherwise. Tetrahydrofuran (THF), toluene and ether (diethyl ether) were distilled from sodium-benzophenone in a continuous still under an atmosphere of argon. Dichloromethane and triethylamine were distilled from calcium hydride in a continuous still under an atmosphere of argon. Reaction temperatures were controlled by Heidolph MR Hei-Standard. Analytical thin-layer chromatography (TLC) was performed using pre-coated TLC plates and visualized using combinations of UV, anisaldehyde, ceric ammonium molybdate (CAM), potassium permanganate, and iodine staining. Flash column chromatography was performed using 300-400 mesh silica gel (Huanghai, Shandong) as the stationary phase. Proton nuclear magnetic resonance spectra were recorded at Agilent-400 MHz spectrometer and Bruker-400 MHz spectrometer, in relative to the solvent residual signal (7.26 ppm) in CDCl<sub>3</sub>. Carbon nuclear magnetic resonance spectra were recorded at Agilent-100 MHz spectrometer and Bruker-100 MHz spectrometer, in relative to the signal of CDCl<sub>3</sub> (77.0 ppm). Optical Rotations were measured on a Rudolph Autopol III S2 polarimeter. The enantiomeric excess (ee) of the products was determined by chiral stationary phase HPLC (SHIMADZU LC 20AB and Daicel Chiralpak columns). The temperature -90 °C was maintained using liquid nitrogen/methanol cooling bath. EA = ethyl acetate; PE = petroleum ether; DCM = dichloromethane

## 1. Lithium Chiral amide mediated deprotonation of 4-*tert*-butylcyclohexanone

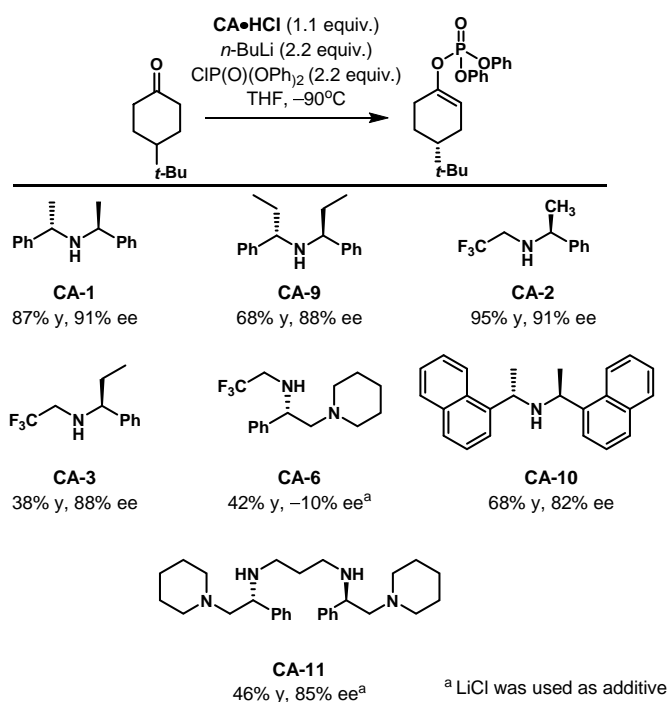

## 2. Experiment procedure and characterization data

### a) Synthesis of Cyclobutanone 1:

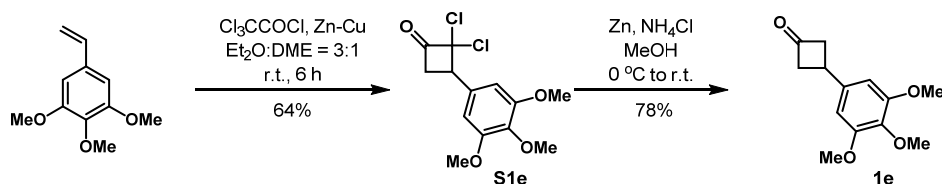

### General procedure A:

#### 3-(3,4,5-Trimethoxyphenyl)cyclobutan-1-one (**1e**)

a) A flame-dried 250 mL round-bottom flask was charged with 3,4,5-trimethoxy styrene (7.80 g, 40.2 mmol), Zn-Cu coupling (8.04 g, 0.123 mol), 150 mL of  $\text{Et}_2\text{O}$  and 50 mL of DME. Then  $\text{Cl}_3\text{CCOCl}$  (9.20 mL, 14.9 g, 82.0 mmol) was added dropwise at room temperature. After stirring overnight, the reaction mixture was filtered through a pad of celite, and rinsed with 100 mL of  $\text{Et}_2\text{O}$ . The filtrate was treated with a cold aqueous solution of HCl (1 M, 100 mL) and extracted with EA twice. The combined organic phase was washed sequentially with a saturated solution of  $\text{NaHCO}_3$ , brine, dried over  $\text{Na}_2\text{SO}_4$ , concentrated, and purified by column chromatography on silica gel (PE:EA = 95:5) to afford the product **S1e** (7.80 g, 25.6 mmol, 64% yield) as a yellow solid, which was directly submitted to next step without further characterization.  $^1\text{H}$  NMR (400 MHz,  $\text{CDCl}_3$ )  $\delta$  (ppm): 6.49 (s, 2H), 4.17 (t,  $J = 10.3$  Hz, 1H), 3.90 (s, 6H), 3.88 (s, 3H), 3.72-3.61 (m, 1H), 3.60-3.49 (m, 1H).

b) To a solution of **S1e** (7.80 g, 25.6 mmol) in MeOH (180 mL) was added  $\text{NH}_4\text{Cl}$  (13.8 g, 0.257 mol), zinc dust (10.1 g, 0.154 mol) sequentially at 0°C. After stirring for 6 h at room temperature, the reaction mixture was filtered through a pad of celite, and rinsed with EA. The filtrate was concentrated under vacuum. Then water was added, the aqueous phase was extracted with EA three times. The combined organic phase was washed with brine, dried over  $\text{Na}_2\text{SO}_4$ , concentrated, and purified by column chromatography on silica gel (PE:EA = 4:1) to afford the product **1e** (4.73 g, 20.0 mmol, 78% yield) as a white solid.

$^1\text{H}$  NMR (400 MHz,  $\text{CDCl}_3$ )  $\delta$  (ppm): 6.49 (s, 2H), 3.87 (s, 6H), 3.83 (s, 3H), 3.71-3.57 (m, 1H), 3.55-3.42 (m, 2H), 3.31-3.16 (m, 2H).

$^{13}\text{C}$  NMR (101 MHz,  $\text{CDCl}_3$ )  $\delta$  (ppm): 206.59, 153.38, 139.29, 136.73, 103.47, 60.86, 56.15, 54.69, 28.81.

IR (neat,  $\text{cm}^{-1}$ ): 3013, 2990, 2978, 2970, 2946, 2920, 2835, 1788, 1771, 1586, 1511, 1469, 1457, 1422, 1370, 1345, 1317, 1237, 1188, 1153, 1126, 1103, 1107.

HRMS-EI ( $m/z$ ):  $[\text{M}]^+$  calcd. for  $\text{C}_{13}\text{H}_{16}\text{O}_4$ , 236.1043; found, 236.1041.

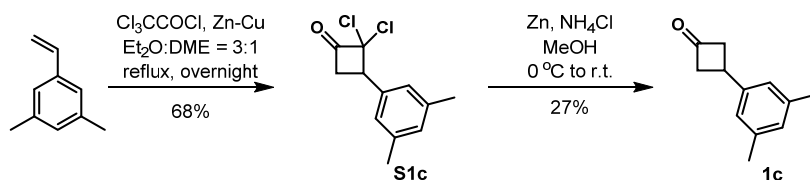

### 3-(3,5-Dimethylphenyl)cyclobutan-1-one (**1c**)

a) The substrate **S1c** was prepared according to **General Procedure A**; using 3,5-dimethylstyrene (1.29 g, 9.77 mmol), Zn-Cu (1.28 g, 19.6 mmol),  $\text{CCl}_3\text{COCl}$  (2.66 g, 14.7 mmol),  $\text{Et}_2\text{O}$  (30 mL) and DME (10 mL); flash chromatography on silica gel (PE:EA = 98:2) provided **S1c** (1.60 g, 8.37 mmol, 67% yield) as a yellow oil.  $^1\text{H}$  NMR (400 MHz,  $\text{CDCl}_3$ )  $\delta$  (ppm): 7.01 (s, 1H), 6.91 (s, 2H), 4.17 (t,  $J = 10.3$  Hz, 1H), 3.70 (dd,  $J = 17.6, 10.4$  Hz, 1H), 3.51 (dd,  $J = 17.6, 10.2$  Hz, 1H), 2.36 (s, 6H).

b) The substrate **1c** was prepared according to **General Procedure A**; using **S1c** (1.60 g, 6.58 mmol),  $\text{NH}_4\text{Cl}$  (3.52 g, 65.8 mmol), Zn (2.58 g, 39.5 mmol) and MeOH (15 mL); flash chromatography on silica gel (PE:EA = 95:5) provided **1c** (0.304 g, 1.74 mmol, 27% yield) as a colorless oil.

$^1\text{H}$  NMR (400 MHz,  $\text{CDCl}_3$ )  $\delta$  (ppm): 6.93 (s, 2H), 6.91 (s, 1H), 3.71-3.53 (m, 1H), 3.53-3.38 (m, 2H), 3.29-3.19 (m, 2H), 2.33 (s, 6H).

$^{13}\text{C}$  NMR (101 MHz,  $\text{CDCl}_3$ )  $\delta$  (ppm): 207.21, 143.54, 138.28, 128.24, 124.28, 54.63, 28.22, 21.29.

IR (neat,  $\text{cm}^{-1}$ ): 3020, 2949, 2919, 1784, 1604, 1473, 1458, 1380, 1341, 1261, 1199, 1172, 1154, 1109.

HRMS-EI ( $m/z$ ):  $[\text{M}]^+$  calcd. for  $\text{C}_{12}\text{H}_{14}\text{O}$ , 174.1039; found, 174.1040.

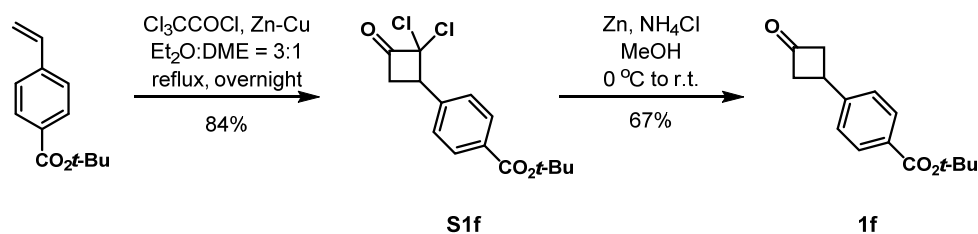

### *tert*-Butyl 4-(3-oxocyclobutyl)benzoate (**1f**)

a) The substrate **S1f** was prepared according to **General Procedure A**; using 4-*t*-butyloxycarbonylstyrene (2.04 g, 10.0 mmol), Zn-Cu (1.95 g, 30.0 mmol),  $\text{CCl}_3\text{COCl}$  (5.45 g, 30.0 mmol),  $\text{Et}_2\text{O}$  (30 mL) and DME (10 mL); flash chromatography on silica gel (PE:EA = 98:2) provided **S1f** (2.64 g, 8.37 mmol, 84% yield) as a yellow solid.  $^1\text{H}$  NMR (400 MHz,  $\text{CDCl}_3$ )  $\delta$  (ppm): 8.03 (dd,  $J = 10.5, 8.9$  Hz, 2H), 7.36 (d,  $J = 8.1$  Hz, 2H), 4.29 (t,  $J = 10.3$  Hz, 1H), 3.74 (dd,  $J = 17.6, 10.4$  Hz, 1H), 3.58 (dd,  $J = 17.6, 10.2$  Hz, 1H), 1.60 (s, 9H).

b) The substrate **1f** was prepared according to **General Procedure A**; using **S1f** (2.64 g, 8.37 mmol), NH<sub>4</sub>Cl (10.1 g, 87.0 mmol), Zn (3.28 g, 50.4 mmol) and MeOH (20 mL); flash chromatography on silica gel (PE:EA = 95:5) provided **1f** (1.39 g, 5.65 mmol, 67% yield) as a colorless oil.

<sup>1</sup>H NMR (400 MHz, CDCl<sub>3</sub>) δ (ppm): 7.97 (d, *J* = 8.3 Hz, 2H), 7.34 (d, *J* = 8.2 Hz, 2H), 3.80-3.67 (m, 1H), 3.62-3.45 (m, 2H), 3.33-3.18 (m, 2H), 1.59 (s, 9H).

<sup>13</sup>C NMR (101 MHz, CDCl<sub>3</sub>) δ (ppm): 205.83, 165.41, 148.18, 130.52, 129.85, 126.34, 81.01, 54.66, 28.48, 28.16.

IR (neat, cm<sup>-1</sup>): 3003, 2981, 2970, 2932, 2908, 2869, 1783, 1703, 1607, 1479, 1458, 1422, 1391, 1367, 1312, 1295, 1252, 1203, 1159, 1115, 1099, 1018, 1003.

HRMS-ESI (*m/z*): [M+H]<sup>+</sup> calcd. for C<sub>15</sub>H<sub>19</sub>O<sub>3</sub>, 247.1329; found, 247.1328.

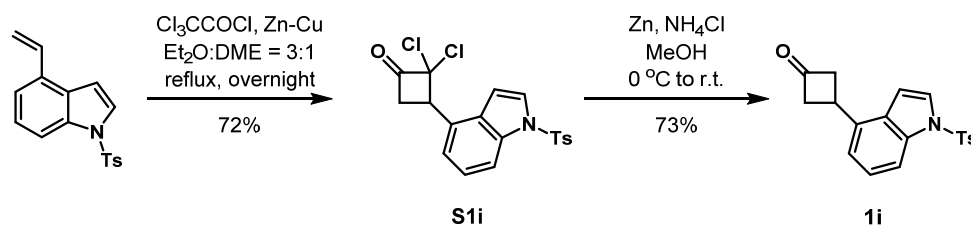

### 3-(1-Tosyl-1*H*-indol-4-yl)cyclobutan-1-one (**1i**)

a) The substrate **S1i** was prepared according to **General Procedure A**; using 1-tosyl-4-vinyl-1*H*-indole (1.77 g, 5.92 mmol), Zn-Cu (1.15 g, 17.7 mmol), CCl<sub>3</sub>COCl (3.22 g, 17.7 mmol), Et<sub>2</sub>O (20 mL) and DME (7 mL); flash chromatography on silica gel (PE:EA = 10:1) provided **S1i** (1.76 g, 4.31 mmol, 72% yield) as a yellow solid. <sup>1</sup>H NMR (400 MHz, CDCl<sub>3</sub>) δ (ppm): 8.01 (t, *J* = 8.0 Hz, 1H), 7.79 (d, *J* = 8.4 Hz, 2H), 7.66 (dd, *J* = 7.1, 2.7 Hz, 1H), 7.35 (dt, *J* = 16.4, 8.1 Hz, 1H), 7.28-7.23 (m, 2H), 7.09 (d, *J* = 7.6 Hz, 1H), 6.94 (dd, *J* = 3.8, 0.7 Hz, 1H), 4.58-4.47 (m, 1H), 3.89 (dd, *J* = 17.9, 10.3 Hz, 1H), 3.64-3.43 (m, 1H), 2.36 (s, 3H).

b) The substrate **1i** was prepared according to **General Procedure A**; using **S1i** (1.76 g, 4.31 mmol), NH<sub>4</sub>Cl (2.30 g, 43.0 mmol), Zn (1.68 g, 25.8 mmol) and MeOH (15 mL); flash chromatography on silica gel (PE:EA = 3:1) provided **1i** (1.07 g, 3.15 mmol, 73% yield) as a colorless foam.

<sup>1</sup>H NMR (400 MHz, CDCl<sub>3</sub>) δ (ppm): 7.91 (d, *J* = 8.3 Hz, 1H), 7.78 (d, *J* = 8.4 Hz, 2H), 7.62 (t, *J* = 6.2 Hz, 1H), 7.31 (t, *J* = 7.9 Hz, 1H), 7.27-7.20 (m, 2H), 7.15 (d, *J* = 7.5 Hz, 1H), 6.64 (d, *J* = 3.7 Hz, 1H), 3.98-3.86 (m, 1H), 3.60-3.47 (m, 2H), 3.43-3.25 (m, 2H), 2.34 (s, 3H).

<sup>13</sup>C NMR (101 MHz, CDCl<sub>3</sub>) δ (ppm): 206.37, 145.06, 135.82, 135.20, 134.80, 129.92, 129.24, 126.87, 126.23, 124.69, 119.73, 112.11, 106.82, 53.68, 26.29, 21.56.

IR (neat,  $\text{cm}^{-1}$ ): 3143, 3118, 3063, 3033, 2979, 2923, 1780, 1733, 1596, 1527, 1484, 1422, 1371, 1361, 1283, 1179, 1163, 1129, 1089, 1038, 1017.

HRMS-EI ( $m/z$ ):  $[M]^+$  calcd. for  $\text{C}_{19}\text{H}_{17}\text{NO}_3\text{S}$ , 339.0924; found, 339.0922.

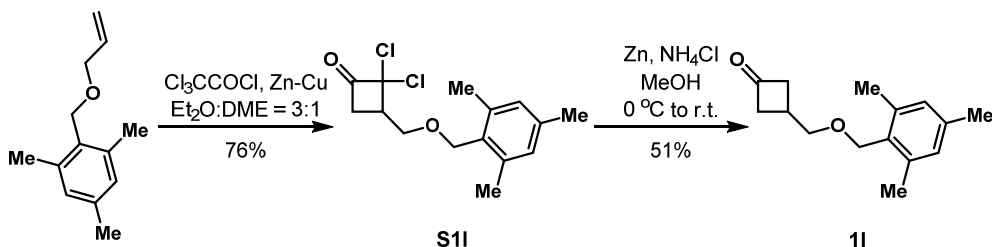

### 3-(((2,4,6-Trimethylbenzyl)oxy)methyl)cyclobutan-1-one (**11**)

a) The substrate **S11** was prepared according to **General Procedure A**; using 3-(((2,4,6-trimethylbenzyl)oxy)methyl)cyclobutan-1-ol (7.40 g, 39.0 mmol), Zn-Cu (7.60 g, 65.4 mmol),  $\text{CCl}_3\text{COCl}$  (14.2 g, 0.078 mmol),  $\text{Et}_2\text{O}$  (100 mL) and DME (30 mL); flash chromatography on silica gel (PE:EA = 15:1) provided **S11** (8.96 g, 29.7 mmol, 76% yield) as a yellow solid.  $^1\text{H}$  NMR (400 MHz,  $\text{CDCl}_3$ )  $\delta$  (ppm): 6.86 (s, 2H), 4.57 (s, 2H), 3.87 (dd,  $J = 9.9, 6.4$  Hz, 1H), 3.74-3.60 (m, 1H), 3.46-3.37 (m, 1H), 3.22-3.04 (m, 2H), 2.36 (s, 6H), 2.26 (s, 3H).

b) The substrate **11** was prepared according to **General Procedure A**; using **S11** (8.96 g, 29.7 mmol),  $\text{NH}_4\text{Cl}$  (16.0 g, 0.300 mol), Zn (11.8 g, 0.182 mol) and MeOH (100 mL); flash chromatography on silica gel (PE:EA = 10:1) provided **11** (3.55 g, 15.3 mmol, 51% yield) as a white solid.

$^1\text{H}$  NMR (400 MHz,  $\text{CDCl}_3$ )  $\delta$  (ppm): 6.86 (s, 2H), 4.56 (d,  $J = 8.5$  Hz, 2H), 3.86 (dt,  $J = 18.4, 9.2$  Hz, 2H), 3.75-3.65 (m, 2H), 3.51-3.33 (m, 2H), 3.23-3.02 (m, 1H), 2.35 (s, 6H), 2.26 (s, 3H).

$^{13}\text{C}$  NMR (101 MHz,  $\text{CDCl}_3$ )  $\delta$  (ppm): 207.61, 137.72, 137.68, 130.92, 128.98, 72.91, 67.10, 50.06, 23.65, 20.94, 19.53.

IR (neat,  $\text{cm}^{-1}$ ): 3055, 2970, 2915, 2872, 1778, 1611, 1582, 1434, 1379, 1358, 1317, 1266, 1214, 1146, 1108, 1083, 1031, 1016.

HRMS-ESI ( $m/z$ ):  $[\text{M}+\text{NH}_4]^+$  calcd. for  $\text{C}_{15}\text{H}_{24}\text{NO}_2$ , 250.1802; found, 250.1798.

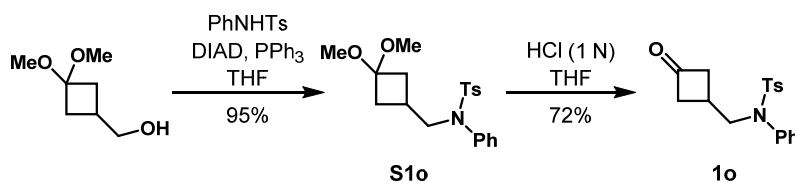

### 4-Methyl-N-((3-oxocyclobutyl)methyl)-N-phenylbenzenesulfonamide (**1o**)

A flame-dried 250 mL round-bottom flask was charged with (3,3-dimethoxycyclobutyl)methanol (1.32 g, 8.90 mol), phenyl toluenesulfonamide (2.65 g, 10.7 mmol), PPh<sub>3</sub> (2.83 g, 10.7 mmol) and 50 mL of THF. DIAD (2.10 mL, 2.16 g, 10.7 mmol) was added dropwise at 0 °C. After stirring for 17 h, the reaction mixture was concentrated, diluted with PE and Et<sub>2</sub>O (1:1, 50 mL) and stirred for 10 min. The resultant mixture was filtered through a pad of celite, and rinsed with PE and Et<sub>2</sub>O. The filtrate was then concentrated under vacuum, and purified by column chromatography on silica gel (PE:EA = 5:1) to afford **S1o** (3.18 g, 8.47 mmol, 95% yield) as a colorless oil, which was directly submitted to next step without further characterization. <sup>1</sup>H NMR (400 MHz, CDCl<sub>3</sub>) δ (ppm): 7.50-7.42 (m, 2H), 7.31-7.26 (m, 3H), 7.24 (d, *J* = 8.0 Hz, 2H), 7.03-6.94 (m, 2H), 3.59 (d, *J* = 7.3 Hz, 2H), 3.09 (s, 3H), 3.07 (s, 3H), 2.41 (s, 3H), 2.18-2.00 (m, 3H), 1.84-1.74 (m, 2H).

b) To a solution of **S1o** (3.18 g, 8.47 mmol) in 40 mL THF was added 2 M aqueous solution of HCl (85 mL, 85.0 mmol). After stirring for 6 h at room temperature, the solvent was removed under vacuum. A saturated aqueous solution of NaHCO<sub>3</sub> was added until pH=7, the aqueous phase was extracted with EA three times. The combined organic phase was washed with brine, dried over Na<sub>2</sub>SO<sub>4</sub>, concentrated, and purified by column chromatography on silica gel (PE:EA = 5:1) to afford the product **1o** (2.01 g, 6.10 mmol, 72% yield) as a white solid.

<sup>1</sup>H NMR (400 MHz, CDCl<sub>3</sub>) δ (ppm): 7.47 (d, *J* = 8.3 Hz, 1H), 7.37-7.30 (m, 2H), 7.26 (d, *J* = 7.8 Hz, 3H), 7.07-6.99 (m, 2H), 3.73 (d, *J* = 7.7 Hz, 2H), 3.09-2.95 (m, 2H), 2.89-2.75 (m, 2H), 2.52-2.45 (m, 2H), 2.43 (s, 3H).

<sup>13</sup>C NMR (101 MHz, CDCl<sub>3</sub>) δ (ppm): 206.05, 143.63, 138.98, 135.00, 129.46, 129.20, 128.78, 128.27, 127.63, 55.07, 50.64, 22.89, 21.51.

IR (neat, cm<sup>-1</sup>): 2967, 2901, 1786, 1593, 1488, 1475, 1451, 1394, 1377, 1339, 1309, 1230, 1161, 1100, 1089, 1049, 1026, 1011.

HRMS-EI (*m/z*): [M]<sup>+</sup> calcd. for C<sub>18</sub>H<sub>19</sub>NO<sub>3</sub>S, 329.1080; found, 329.1078.

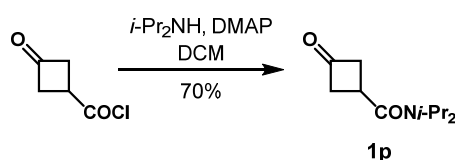

### ***N,N*-Diisopropyl-3-oxocyclobutane-1-carboxamide (1p)**

A flame-dried 250 mL round-bottom flask was charged with 3-oxocyclobutane-1-carbonyl chloride (10.0 g, 75.5 mmol), DMAP (0.922 g, 7.55 mmol) and DCM (80 mL). *i*-Pr<sub>2</sub>NH (60.0 mL, 38.8 g, 0.383 mol) was added dropwise under 0 °C. The resultant mixture was allowed to stir at room temperature for 20 h. Then the

mixture was quenched with water (100 mL), the resultant was extracted with DCM. The combined organic phase was washed with brine, dried over Na<sub>2</sub>SO<sub>4</sub>, to afford **1p** (11.4 g, 57.8 mmol, 77% yield) as a faint yellow solid.

<sup>1</sup>H NMR (400 MHz, CDCl<sub>3</sub>) δ (ppm): 4.02-3.88 (m, 1H), 3.57-3.39 (m, 3H), 3.31-3.18 (m, 1H), 3.15-3.03 (m, 2H), 1.36 (d, *J* = 6.8 Hz, 6H), 1.19 (d, *J* = 6.7 Hz, 6H).

<sup>13</sup>C NMR (101 MHz, CDCl<sub>3</sub>) δ (ppm): 204.87, 170.72, 50.65, 48.35, 45.86, 27.28, 20.97, 20.45.

IR (neat, cm<sup>-1</sup>): 2976, 2941, 2922, 2915, 2888, 1779, 1619, 1504, 1472, 1445, 1370, 1352, 1324, 1293, 1265, 1209, 1202, 1141, 1121, 1103, 1049, 1030.

HRMS-ESI (*m/z*): [M+H]<sup>+</sup> calcd. for C<sub>11</sub>H<sub>20</sub>NO<sub>2</sub>, 198.1489; found, 198.1487.

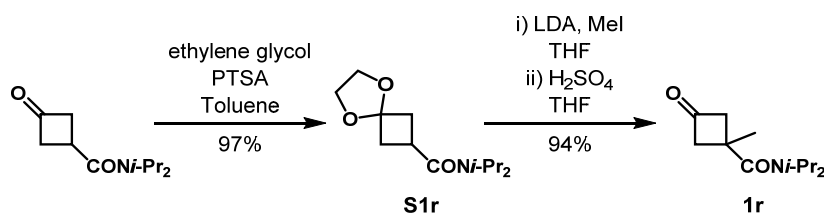

### *N,N*-Diisopropyl-1-methyl-3-oxocyclobutane-1-carboxamide (**1r**)

a) To a round-bottom flask was charged with *N,N*-diisopropyl-3-oxocyclobutane-1-carboxamide (2.00 g, 10.1 mmol), ethylene glycol (0.9 mL, 0.943 g, 15.2 mmol), *p*-toluenesulfonic acid monohydrate (9.63 mg, 5.07 mmol) and toluene (50 mL). The flask was fitted with a Dean Stark trap and the reaction was heated to reflux for 10 h. The resultant mixture was cooled down to room temperature, diluted with water, and the aqueous phase was extracted with DCM. The combined organic phase was dried over Na<sub>2</sub>SO<sub>4</sub>, concentrated, and purified by column chromatography on silica gel (PE:EA = 4:1) to afford the product **S1r** (2.52 g, 9.87 mmol, 97% yield) as a yellow oil, which was directly submitted to next step without further characterization. <sup>1</sup>H NMR (400 MHz, CDCl<sub>3</sub>) δ (ppm): 3.97-3.80 (m, 5H), 2.93 (p, *J* = 8.8 Hz, 1H), 2.71-2.61 (m, 2H), 2.44-2.33 (m, 2H), 1.37 (d, *J* = 6.8 Hz, 6H), 1.28-1.19 (m, 1H), 1.15 (d, *J* = 6.7 Hz, 6H).

b) A flame-dried 500 mL round-bottom flask was charged with *i*-Pr<sub>2</sub>NH (7.4 mL, 5.34 g, 52.8 mmol) and THF (140 mL), and *n*-BuLi (2.28 M, 21.9 mL, 49.9 mmol) was added dropwise under -78 °C. The reaction mixture was stirred for 1 h before **S1r** (6.00 g, 24.9 mmol) in THF (60 mL) was added dropwise. The reaction was stirred at the same temperature for 1 h before warmed to 0 °C. After additional 1 h, the mixture was then again cooled down to -78 °C. MeI (7.8 mL, 17.8 g, 0.125 mol) was then added dropwise. After stirring for 0.5 h at -78 °C and 1 h at 0 °C, the reaction was quenched with a saturated aqueous solution of NH<sub>4</sub>Cl, and extracted



with DCM. The combined organic phase was concentrated, and directly submitted to next step without purification.

c) The resultant crude product above was dissolved in THF (100 mL) in a 100 mL round-bottom flask, an aqueous solution of H<sub>2</sub>SO<sub>4</sub> (1.0 M, 100 mL, 0.100 mol) was added at 0 °C. The resultant mixture was stirred for 0.5 h before warmed to room temperature. After 20 h, the reaction mixture was extracted with DCM, the combined organic phase was washed with a saturated aqueous solution of NaHCO<sub>3</sub> and brine sequentially, dried over Na<sub>2</sub>SO<sub>4</sub>, concentrated, and purified by column chromatography on silica gel (PE:EA = 10:1) to afford the product **2r** (4.98 g, 23.4 mmol, 94% yield) as a faint yellow solid.

<sup>1</sup>H NMR (400 MHz, CDCl<sub>3</sub>) δ (ppm): 3.77-3.65 (m, 1H), 3.62-3.53 (m, 2H), 3.36-3.22 (m, 1H), 2.81-2.68 (m, 2H), 1.48 (s, 3H), 1.37 (d, *J* = 6.8 Hz, 6H), 1.17 (d, *J* = 6.6 Hz, 6H).

<sup>13</sup>C NMR (101 MHz, CDCl<sub>3</sub>) δ (ppm): 206.27, 173.23, 57.10, 49.12, 46.33, 35.79, 24.58, 20.57, 20.40.

IR (neat, cm<sup>-1</sup>): 3022, 2999, 2966, 2935, 2877, 1782, 1619, 1470, 1460, 1438, 1373, 1333, 1238, 1213, 1189, 1168, 1135, 1116, 1039.

HRMS-ESI (*m/z*): [M+H]<sup>+</sup> calcd. for C<sub>12</sub>H<sub>22</sub>NO<sub>2</sub>, 212.1645; found, 212.1643.

## b) Synthesis of Cyclobutene 2:

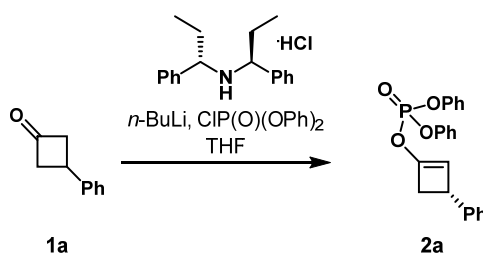

### General Procedure B :

#### (R)-Diphenyl (3-phenylcyclobut-1-en-1-yl) phosphate (2a)

A flame-dried 25 mL Schlenk tube was charged with hydrochloride salt of chiral amine CA-9·HCl (0.127 g, 0.440 mmol) and THF (1.2 mL). The resultant was cooled down to -78 °C, and *n*-BuLi (2.28 M in hexane, 0.39 mL, 0.880 mmol) was added dropwise. The mixture was stirred for 5 min before warmed to room temperature. The mixture was then stirred for additional 15 min until the solution became clear. Then the reaction was cooled down to -90 °C, and a solution of 3-phenylcyclobutan-1-one (58.5 mg, 0.400 mmol) in THF (0.5 mL + 0.3 mL + 0.2 mL) was added over 0.5 h. After stirring for additional 30 min, CIP(O)(OPh)<sub>2</sub> (0.42 mL, 0.540 g, 2.00 mmol) was added dropwise over 10 min. The reaction mixture was then stirred for

0.5 h at  $-90\text{ }^{\circ}\text{C}$  before warmed to  $-78\text{ }^{\circ}\text{C}$ . After further 3.5 h, the reaction was quenched with THF-MeOH (3:1, 0.4 mL), and followed by 2 M aqueous solution of HCl. The resultant was extracted with ethyl acetate, and the combined organic phase was washed with a saturated aqueous solution of  $\text{NaHCO}_3$  and brine sequentially, dried over  $\text{Na}_2\text{SO}_4$ , concentrated, and purified by column chromatography on silica gel (PE:EA = 10:1) to afford the product **2a** (0.115 g, 0.308 mmol, 76% yield) as a colorless oil.

Ee: 94% (Chiralcel® OJ-H; 10% *i*-PrOH in hexanes; flow rate = 1.0 mL/min; detection at 210 nm;  $t_1=14.2\text{ min}$  (major);  $t_2=16.2\text{ min}$  (minor).

$[\alpha]_{\text{D}}^{18}$  7.58 (c 0.81,  $\text{CHCl}_3$ ).

$^1\text{H NMR}$  (400 MHz,  $\text{CDCl}_3$ )  $\delta$  (ppm): 7.46–7.36 (m, 4H), 7.36–7.22 (m, 11H), 5.47 (s, 1H), 3.75–3.67 (m, 1H), 3.33 (dd,  $J = 13.3, 4.5\text{ Hz}$ , 1H), 2.64 (d,  $J = 13.3\text{ Hz}$ , 1H).

$^{13}\text{C NMR}$  (101 MHz,  $\text{CDCl}_3$ )  $\delta$  (ppm): 150.25 (d,  $J = 7.3\text{ Hz}$ ), 142.06 (d,  $J = 9.8\text{ Hz}$ ), 142.06, 129.88, 128.36, 126.60, 126.54, 125.68, 120.02 (d,  $J = 4.8\text{ Hz}$ ), 120.01 (d,  $J = 5.0\text{ Hz}$ ), 113.81 (d,  $J = 7.8\text{ Hz}$ ), 42.90 (d,  $J = 5.6\text{ Hz}$ ), 37.76.

$^{31}\text{P NMR}$  (162 MHz,  $\text{CDCl}_3$ )  $\delta$  (ppm):  $-18.16$ .

IR (neat,  $\text{cm}^{-1}$ ): 3062, 3028, 2970, 2931, 1645, 1630, 1589, 1300, 1180, 1161.

HRMS-ESI ( $m/z$ ):  $[\text{M}+\text{H}]^+$  calcd. for  $\text{C}_{22}\text{H}_{19}\text{O}_4\text{P}$ , 378.1015; found, 378.1009.

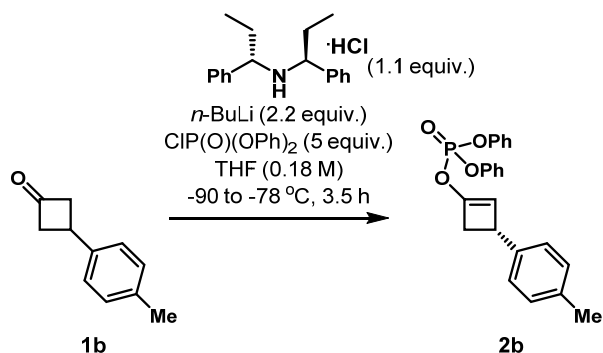

### (*R*)-Diphenyl (3-(*p*-tolyl)cyclobut-1-en-1-yl) phosphate (**2b**)

According to **General Procedure B**, using **1b** (64.0 mg, 0.400 mmol), CA-9·HCl (0.127 g, 0.440 mmol), *n*-BuLi (2.25 M in hexane, 0.39 mL, 0.880 mmol) and  $\text{CIP(O)(OPh)}_2$  (0.42 mL, 0.540 g, 2.00 mmol); flash chromatography on silica gel (PE:EA = 5:1) afforded **2b** (0.155 g, 0.332 mmol, 85% yield) as a colorless oil. Ee: 93% (Chiralcel® OD-H; 5% *i*-PrOH in hexanes; flow rate = 1.0 mL/min; detection at 210 nm;  $t_1=10.5\text{ min}$  (major);  $t_2=11.8\text{ min}$  (minor).

$[\alpha]_{\text{D}}^{25}$  11.44 (c 0.50,  $\text{CHCl}_3$ ).

$^1\text{H}$  NMR (400 MHz,  $\text{CDCl}_3$ )  $\delta$  (ppm): 7.41-7.32 (m, 4H), 7.30-7.19 (m, 7H), 7.15-7.02 (m, 3H), 5.40 (s, 1H), 3.64 (d,  $J = 3.4$  Hz, 1H), 3.27 (ddd,  $J = 13.2, 4.5, 1.5$  Hz, 1H), 2.57 (d,  $J = 13.2$  Hz, 1H), 2.32 (s, 3H).

$^{13}\text{C}$  NMR (101 MHz,  $\text{CDCl}_3$ )  $\delta$  (ppm): 150.29 (d,  $J = 7.3$  Hz), 141.98 (d,  $J = 9.9$  Hz), 139.04, 136.19, 129.89, 129.06, 126.46, 125.68, 120.05 (d,  $J = 4.9$  Hz), 120.04 (d,  $J = 5.0$  Hz), 113.97 (d,  $J = 7.8$  Hz), 42.99 (d,  $J = 5.6$  Hz), 37.47, 21.02.

$^{31}\text{P}$  NMR (162 MHz,  $\text{CDCl}_3$ )  $\delta$  (ppm): -18.19.

IR (neat,  $\text{cm}^{-1}$ ): 3070, 3044, 3014, 2973, 2941, 2990, 2837, 1786, 1716, 1645, 1631, 1590, 1488, 1310, 1219, 1812, 1611, 1025, 1009.

HRMS-EI ( $m/z$ ):  $[\text{M}]^+$  calcd. for  $\text{C}_{23}\text{H}_{21}\text{O}_4\text{P}$ , 392.1172; found, 392.1167.

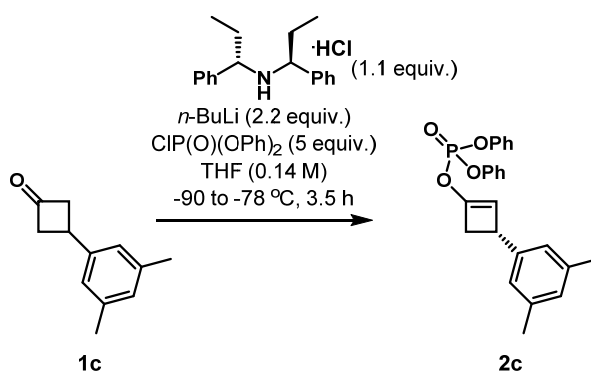

### (R)-3-(3,5-Dimethylphenyl)cyclobut-1-en-1-yl diphenyl phosphate (**2c**)

According to **General Procedure B**, using **1c** (47.4 mg, 0.272 mmol), CA-9-HCl (96.0 mg, 0.33 mmol),  $n\text{-BuLi}$  (2.25 M in hexane, 0.29 mL, 0.66 mmol) and  $\text{ClP(O)(OPh)}_2$  (0.31 mL, 0.40 g, 1.50 mmol); flash chromatography on silica gel (PE:EA = 95:5) afforded **2c** (97.4 mg, 0.240 mmol, 88% yield) as a colorless oil. Ee: 93% (Chiralcel® OJ-H; 10%  $i\text{-PrOH}$  in hexanes; flow rate = 1.0 mL/min; detection at 210 nm;  $t_1=7.0$  min (major);  $t_2=8.2$  min (minor).

$[\alpha]_D^{24}$  8.70 (c 1.0,  $\text{CHCl}_3$ ).

$^1\text{H}$  NMR (400 MHz,  $\text{CDCl}_3$ )  $\delta$  (ppm): 7.45-7.30 (m, 4H), 7.30-7.17 (m, 6H), 6.85 (s, 3H), 5.41 (s, 1H), 3.63-3.59 (m, 1H), 3.26 (ddd,  $J = 13.2, 4.5, 1.5$  Hz, 1H), 2.59 (d,  $J = 13.2$  Hz, 1H), 2.28 (s, 6H).

$^{13}\text{C}$  NMR (101 MHz,  $\text{CDCl}_3$ )  $\delta$  (ppm): 150.27 (d,  $J = 7.3$  Hz), 142.00, 141.87 (d,  $J = 9.9$  Hz), 137.91, 129.87, 128.27, 125.67, 124.34, 120.02 (d,  $J = 4.9$  Hz), 120.01 (d,  $J = 4.9$  Hz), 113.89 (d,  $J = 7.8$  Hz), 42.82 (d,  $J = 5.6$  Hz), 37.64, 21.22.

$^{31}\text{P}$  NMR (162 MHz,  $\text{CDCl}_3$ )  $\delta$  (ppm): -18.20.

IR (neat,  $\text{cm}^{-1}$ ): 3072, 3043, 3013, 2973, 2943, 2910, 2835, 1786, 1716, 1646, 1631, 1590, 1489, 1313, 1302, 1219, 1184, 1161, 1051, 1026, 1010.

HRMS-ESI ( $m/z$ ):  $[\text{M}+\text{H}]^+$  calcd. for  $\text{C}_{24}\text{H}_{23}\text{O}_4\text{P}$ , 407.1407; found, 407.1406.

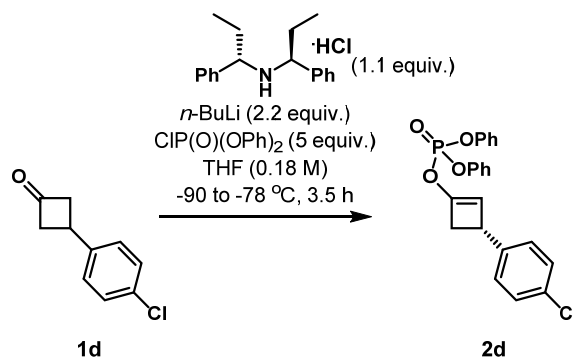

### (R)-3-(4-Chlorophenyl)cyclobut-1-en-1-yl diphenyl phosphate (2d)

According to **General Procedure B**, using **1d** (76.0 mg, 0.421 mmol), CA-9·HCl (0.127 g, 0.440 mmol),  $n\text{-BuLi}$  (2.25 M in hexane, 0.39 mL, 0.880 mmol) and  $\text{CIP(O)(OPh)}_2$  (0.42 mL, 0.540 g, 2.00 mmol); flash chromatography on silica gel (PE:EA = 95:5) afforded **2d** (0.132 g, 0.320 mmol, 80% yield) as a colorless oil. Ee: 93% (Chiralcel® OJ-H; 10%  $i\text{-PrOH}$  in hexanes; flow rate = 1.0 mL/min; detection at 210 nm;  $t_1=18.0$  min (major);  $t_2=26.4$  min (minor).

$[\alpha]_D^{25}$  12.74 (c 1.0,  $\text{CHCl}_3$ ).

$^1\text{H}$  NMR (400 MHz,  $\text{CDCl}_3$ )  $\delta$  (ppm): 7.37 (t,  $J = 7.9$  Hz, 4H), 7.32-7.19 (m, 8H), 7.17-7.11 (d,  $J = 8.4$  Hz, 2H), 5.38 (s, 1H), 3.64 (d,  $J = 3.7$  Hz, 1H), 3.28 (ddd,  $J = 13.3, 4.5, 1.4$  Hz, 1H), 2.54 (d,  $J = 13.3$  Hz, 1H).

$^{13}\text{C}$  NMR (101 MHz,  $\text{CDCl}_3$ )  $\delta$  (ppm): 150.23 (d,  $J = 7.2$  Hz), 142.35 (d,  $J = 9.7$  Hz), 140.61, 132.27, 129.92, 128.49, 127.93, 125.75, 120.02 (d,  $J = 5.0$  Hz), 120.01 (d,  $J = 5.1$  Hz), 113.48 (d,  $J = 7.9$  Hz), 42.95 (d,  $J = 5.7$  Hz), 37.20.

$^{31}\text{P}$  NMR (162 MHz,  $\text{CDCl}_3$ )  $\delta$  (ppm):  $-18.21$ .

IR (neat,  $\text{cm}^{-1}$ ): 3070, 2974, 2941, 2899, 2839, 1786, 1716, 1646, 1631, 1590, 1489, 1409, 1312, 1300, 1181, 1161, 1090, 1026, 1010.

HRMS-ESI ( $m/z$ ):  $[\text{M}+\text{H}]^+$  calcd. for  $\text{C}_{22}\text{H}_{18}\text{ClO}_4\text{P}$ , 413.0704; found, 413.0700.

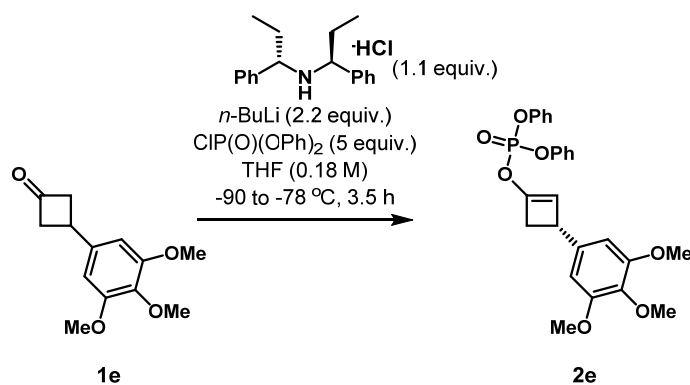

**(R)-Diphenyl (3-(3,4,5-trimethoxyphenyl)cyclobut-1-en-1-yl) phosphate (2e)**

According to **General Procedure B**, using **1e** (95.0 mg, 0.400 mmol), CA-9·HCl (0.127 g, 0.440 mmol), *n*-BuLi (2.28 M in hexane, 0.39 mL, 0.880 mmol) and CIP(O)(OPh)<sub>2</sub> (0.42 mL, 0.540 g, 2.00 mmol); flash chromatography on silica gel (PE:EA = 5:1) afforded **2e** (0.136 g, 0.290 mmol, 73% yield) as a colorless oil. Ee: 88% (Chiralcel® OZ-H; 10% *i*-PrOH in hexanes; flow rate = 1.0 mL/min; detection at 210 nm; t<sub>1</sub>=43.8 min (major); t<sub>2</sub>=51.6 min (minor)).

[α]<sub>D</sub><sup>22</sup> 1.54 (c 1.0, CHCl<sub>3</sub>).

<sup>1</sup>H NMR (400 MHz, CDCl<sub>3</sub>) δ (ppm): 7.37 (t, *J* = 7.8 Hz, 4H), 7.29-7.20 (m, 6H), 6.47 (s, 2H), 5.42 (s, 1H), 3.82 (s, 3H), 3.81 (s, 6H), 3.63 (s, 1H), 3.32-3.23 (m, 1H), 2.61 (d, *J* = 13.2 Hz, 1H).

<sup>13</sup>C NMR (101 MHz, CDCl<sub>3</sub>) δ (ppm): 153.26, 150.26 (d, *J* = 7.2 Hz), 142.35 (d, *J* = 9.8 Hz), 137.94, 136.70, 129.91, 125.74, 119.99 (d, *J* = 4.9 Hz), 119.98 (d, *J* = 5.0 Hz), 113.69 (d, *J* = 7.7 Hz), 103.37, 60.82, 56.04, 43.09 (d, *J* = 5.5 Hz), 38.13.

<sup>31</sup>P NMR (162 MHz, CDCl<sub>3</sub>) δ (ppm): -18.16.

IR (neat, cm<sup>-1</sup>): 3077, 2972, 2940, 2911, 2840, 1783, 1645, 1631, 1588, 1506, 1488, 1457, 1418, 1342, 1313, 1301, 1234, 1183, 1162, 1123, 1025, 1009.

HRMS-ESI (*m/z*): [M+H]<sup>+</sup> calcd. for C<sub>25</sub>H<sub>26</sub>O<sub>7</sub>P, 469.1411; found, 469.1403.

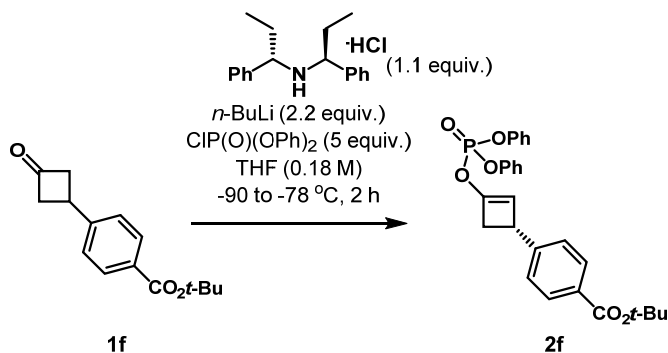

***tert*-Butyl (R)-4-(3-((diphenoxyphosphoryl)oxy)cyclobut-2-en-1-yl)benzoate (2f)**

According to **General Procedure B**, using **1f** (98.5 mg, 0.400 mmol), CA-9·HCl (0.127 g, 0.440 mmol), *n*-

BuLi (2.25 M in hexane, 0.39 mL, 0.880 mmol) and ClP(O)(OPh)<sub>2</sub> (0.42 mL, 0.540 g, 2.00 mmol); flash chromatography on silica gel (PE:EA = 5:1) afforded **2f** (0.159 g, 0.332 mmol, 83% yield) as a colorless oil. Ee: 90% (Chiralcel® OD-H; 10% *i*-PrOH in hexanes; flow rate = 1.0 mL/min; detection at 210 nm; t<sub>1</sub>=20.5 min (major); t<sub>2</sub>=23.9 min (minor).

[α]<sub>D</sub><sup>22</sup> 12.57 (c 0.81, CHCl<sub>3</sub>).

<sup>1</sup>H NMR (400 MHz, CDCl<sub>3</sub>) δ (ppm): 7.90 (d, *J* = 8.3 Hz, 2H), 7.37 (t, *J* = 7.8 Hz, 4H), 7.30-7.20 (m, 8H), 5.42 (s, 1H), 3.76-3.67 (m, 1H), 3.31 (ddd, *J* = 13.3, 4.5, 1.5 Hz, 1H), 2.57 (d, *J* = 13.3 Hz, 1H), 1.59 (s, 9H).

<sup>13</sup>C NMR (101 MHz, CDCl<sub>3</sub>) δ (ppm): 165.62, 150.22 (d, *J* = 7.1 Hz), 150.18, 146.96, 142.35 (d, *J* = 9.7 Hz), 130.47, 129.91, 129.57, 126.39, 125.75, 120.01 (d, *J* = 5.0 Hz), 120.00 (d, *J* = 4.9 Hz), 113.40 (d, *J* = 7.8 Hz), 80.83, , 42.82 (d, *J* = 5.8 Hz), 37.69, 28.17.

<sup>31</sup>P NMR (162 MHz, CDCl<sub>3</sub>) δ (ppm): -18.21.

IR (neat, cm<sup>-1</sup>): 3070, 3005, 2976, 2932, 1708, 1645, 1631, 1590, 1488, 1456, 1415, 1392, 1368, 1309, 1291, 1220, 1182, 1161, 1115, 1102, 1082, 1025, 1009.

HRMS-ESI (*m/z*): [M+H]<sup>+</sup> calcd. for C<sub>27</sub>H<sub>27</sub>O<sub>6</sub>P, 479.1618; found, 479.1613.

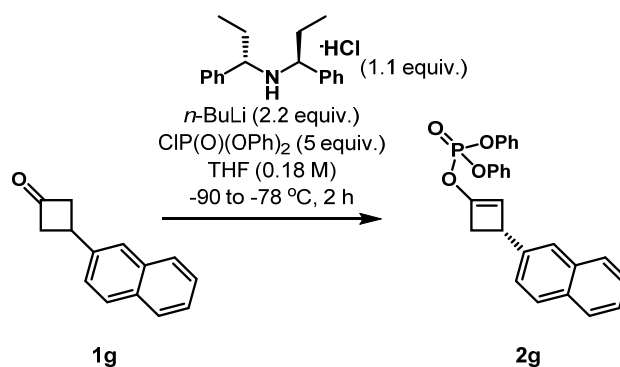

### (*R*)-3-(Naphthalen-2-yl)cyclobut-1-en-1-yl diphenyl phosphate (**2g**)

According to **General Procedure B**, using **1g** (78.5 mg, 0.400 mmol), CA-9·HCl (0.127 g, 0.440 mmol), *n*-BuLi (2.25 M in hexane, 0.39 mL, 0.880 mmol) and ClP(O)(OPh)<sub>2</sub> (0.42 mL, 0.540 g, 2.00 mmol); flash chromatography on silica gel (PE:EA = 10:1) afforded **2g** (0.134 g, 0.313 mmol, 78% yield) as a colorless oil. Ee: 92% (Chiralcel® OJ-H; 40% *i*-PrOH in hexanes; flow rate = 1.0 mL/min; detection at 210 nm; t<sub>1</sub>=20.8 min (major); t<sub>2</sub>=26.3 min (minor).

[α]<sub>D</sub><sup>26</sup> 19.54 (c 1.0, CHCl<sub>3</sub>).

<sup>1</sup>H NMR (400 MHz, CDCl<sub>3</sub>) δ (ppm): 7.82-7.73 (m, 3H), 7.66 (s, 1H), 7.48-7.19 (m, 13H), 5.51 (s, 1H), 3.87-3.81 (m, 1H), 3.35 (ddd, *J* = 13.3, 4.5, 1.5 Hz, 1H), 2.67 (d, *J* = 13.3 Hz, 1H).

$^{13}\text{C}$  NMR (101 MHz,  $\text{CDCl}_3$ )  $\delta$  (ppm): 150.28 (d,  $J = 7.2$  Hz), 142.22 (d,  $J = 9.8$  Hz), 139.59, 133.39, 132.46, 129.91, 128.11, 127.59, 127.51, 126.05, 125.72, 125.44, 124.99, 124.92, 120.05 (d,  $J = 5.0$  Hz), 113.81 (d,  $J = 7.8$  Hz), 42.82 (d,  $J = 5.7$  Hz), 37.95.

$^{31}\text{P}$  NMR (162 MHz,  $\text{CDCl}_3$ )  $\delta$  (ppm): -18.15.

IR (neat,  $\text{cm}^{-1}$ ): 3094, 3054, 3015, 2978, 2928, 1652, 1625, 1587, 1485, 1456, 1308, 1292, 1220, 1184, 1163, 1124, 1071, 1024, 1009.

HRMS-ESI ( $m/z$ ):  $[\text{M}+\text{H}]^+$  calcd. for  $\text{C}_{26}\text{H}_{22}\text{O}_4\text{P}$ , 429.1250; found, 429.1246.

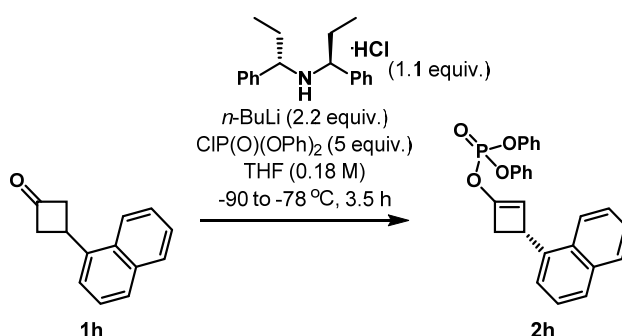

### (*R*)-3-(Naphthalen-1-yl)cyclobut-1-en-1-yl diphenyl phosphate (**2h**)

According to **General Procedure B**, using **1h** (81.0 mg, 0.413 mmol), CA-9-HCl (0.127 g, 0.440 mmol),  $n\text{-BuLi}$  (2.25 M in hexane, 0.39 mL, 0.880 mmol) and  $\text{ClP}(\text{O})(\text{OPh})_2$  (0.42 mL, 0.540 g, 2.00 mmol); flash chromatography on silica gel (PE:EA = 10:1) afforded **2h** (0.153 g, 0.313 mmol, 86% yield) as a colorless oil. Ee: 93% (Chiralcel® OD-H; 10% *i*-PrOH in hexanes; flow rate = 1.0 mL/min; detection at 210 nm;  $t_1=12.1$  min (major);  $t_2=14.1$  min (minor).

$[\alpha]_D^{24}$  -171.82 (c 1.0,  $\text{CHCl}_3$ ).

$^1\text{H}$  NMR (400 MHz,  $\text{CDCl}_3$ )  $\delta$  (ppm): 8.00-7.93 (m, 1H), 7.89-7.85 (m, 1H), 7.74 (d,  $J = 8.1$  Hz, 1H), 7.55-7.46 (m, 2H), 7.44-7.17 (m, 12H), 5.67 (s, 1H), 4.34 (d,  $J = 3.6$  Hz, 1H), 3.53 (ddd,  $J = 13.0, 4.6, 1.5$  Hz, 1H), 2.62 (d,  $J = 13.0$  Hz, 1H).

$^{13}\text{C}$  NMR (101 MHz,  $\text{CDCl}_3$ )  $\delta$  (ppm): 150.27 (d,  $J = 7.4$  Hz), 150.25 (d,  $J = 7.2$  Hz), 141.92 (d,  $J = 9.8$  Hz), 138.11, 133.52, 131.59, 129.89, 128.77, 127.17, 126.01, 125.70, 125.65, 125.37, 123.31, 123.10, 120.07 (d,  $J = 4.9$  Hz), 120.05 (d,  $J = 5.0$  Hz), 111.80 (d,  $J = 7.8$  Hz), 42.08 (d,  $J = 5.8$  Hz), 34.93.

$^{31}\text{P}$  NMR (162 MHz,  $\text{CDCl}_3$ )  $\delta$  (ppm): -18.13.

IR (neat,  $\text{cm}^{-1}$ ): 3062, 3064, 2974, 2942, 2900, 2834, 1786, 1716, 1647, 1634, 1590, 1488, 1457, 1396, 1301, 1219, 1184, 1161, 1072, 1025, 1009.

HRMS-ESI ( $m/z$ ):  $[M+H]^+$  calcd. for  $C_{26}H_{22}O_4P$ , 429.1250; found, 429.1247.

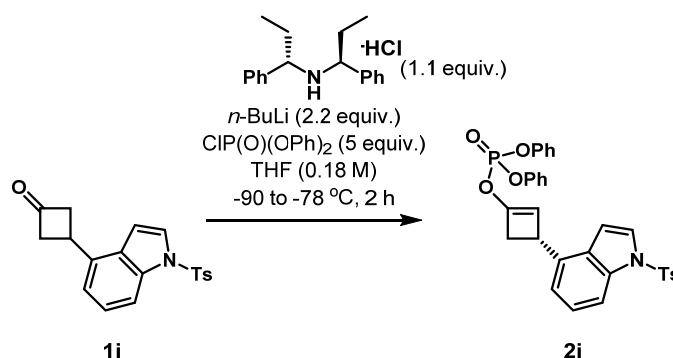

**(R)-Diphenyl (3-(1-tosyl-1H-indol-4-yl)cyclobut-1-en-1-yl) phosphate (2i)**

According to **General Procedure B**, using **1i** (0.136 g, 0.400 mmol), CA-9·HCl (0.127 g, 0.440 mmol), *n*-BuLi (2.28 M in hexane, 0.39 mL, 0.880 mmol) and ClP(O)(OPh)<sub>2</sub> (0.42 mL, 0.540 g, 2.00 mmol); flash chromatography on silica gel (PE:EA = 95:5) afforded **2i** (91.0 mg, 0.159 mmol, 40% yield) as a colorless oil. Ee: 93% (Chiralcel® AD-H; 40% *i*-PrOH in hexanes; flow rate = 1.0 mL/min; detection at 210 nm;  $t_1$ =34.8 min (major);  $t_2$ =38.3 min (minor).

$[\alpha]_D^{23}$  -19.78 (c 1.0, CHCl<sub>3</sub>).

<sup>1</sup>H NMR (400 MHz, CDCl<sub>3</sub>) δ (ppm): 7.86 (d,  $J$  = 8.3 Hz, 1H), 7.78-7.73 (m, 2H), 7.55 (d,  $J$  = 3.7 Hz, 1H), 7.39-7.31 (m, 4H), 7.28-7.18 (m, 9H), 7.07 (d,  $J$  = 7.4 Hz, 1H), 6.72 (dd,  $J$  = 3.7, 0.6 Hz, 1H), 5.49 (s, 1H), 3.97-3.93 (m, 1H), 3.34 (ddd,  $J$  = 13.2, 4.5, 1.5 Hz, 1H), 2.66 (d,  $J$  = 13.2 Hz, 1H), 2.33 (s, 3H).

<sup>13</sup>C NMR (101 MHz, CDCl<sub>3</sub>) δ (ppm): 150.21 (d,  $J$  = 7.3 Hz), 144.91, 142.01 (d,  $J$  = 9.8 Hz), 135.25, 134.83, 134.68, 129.89, 129.86, 129.16, 126.82, 125.99, 125.72, 124.53, 120.53, 120.01 (d,  $J$  = 4.9 Hz), 120.00 (d,  $J$  = 4.9 Hz), 112.95 (d,  $J$  = 7.8 Hz), 111.95, 106.79, 41.89 (d,  $J$  = 5.7 Hz), 35.57, 21.53.

<sup>31</sup>P NMR (162 MHz, CDCl<sub>3</sub>) δ (ppm): -18.15.

IR (neat, cm<sup>-1</sup>): 3061, 2043, 2977, 2938, 1786, 1730, 1646, 1631, 1590, 1527, 1487, 1421, 1372, 1301, 1282, 1179, 1161, 1130, 1089, 1025, 1009.

HRMS-ESI ( $m/z$ ):  $[M+H]^+$  calcd. for  $C_{31}H_{27}NO_6PS$ , 572.1291; found, 572.1290.



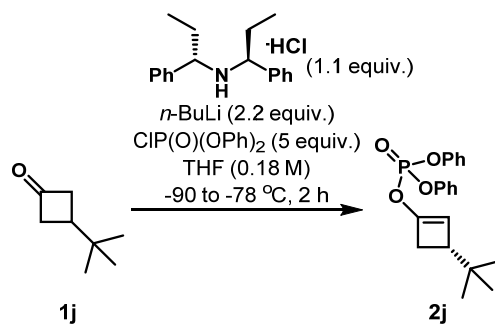

**(R)-3-(tert-Butyl)cyclobut-1-en-1-yl diphenyl phosphate (2j)**

According to **General Procedure B**, using **1j** (50.5 mg, 0.400 mmol), CA-9·HCl (0.127 g, 0.440 mmol), *n*-BuLi (2.25 M in hexane, 0.39 mL, 0.880 mmol) and ClP(O)(OPh)<sub>2</sub> (0.42 mL, 0.540 g, 2.00 mmol); flash chromatography on silica gel (PE:EA = 98:2) afforded **2j** (0.103 g, 0.288 mmol, 72% yield) as a colorless oil. Ee: 87% (Chiralcel® AD-H; 5% *i*-PrOH in hexanes; flow rate = 1.0 mL/min; detection at 210 nm; t<sub>1</sub>=20.0 min (minor); t<sub>2</sub>=23.5 min (major)).

[α]<sub>D</sub><sup>21</sup> 11.24 (c 1.0, CHCl<sub>3</sub>).

<sup>1</sup>H NMR (400 MHz, CDCl<sub>3</sub>) δ (ppm): 7.39-7.32 (m, 4H), 7.27-7.18 (m, 6H), 5.18 (s, 1H), 2.68 (ddd, *J* = 13.4, 4.4, 1.6 Hz, 1H), 2.45 (d, *J* = 13.4 Hz, 1H), 2.34 (s, 1H), 0.87 (s, 9H).

<sup>13</sup>C NMR (101 MHz, CDCl<sub>3</sub>) δ (ppm): 150.32 (d, *J* = 7.3 Hz), 141.50 (d, *J* = 10.2 Hz), 129.83, 125.57, 120.02 (d, *J* = 5.0 Hz), 112.82 (d, *J* = 7.7 Hz), 44.76, 34.31 (d, *J* = 5.6 Hz), 31.21, 26.43.

<sup>31</sup>P NMR (162 MHz, CDCl<sub>3</sub>) δ (ppm): -18.12.

IR (neat, cm<sup>-1</sup>): 3072, 2957, 2867, 1642, 1627, 1590, 1489, 1365, 1313, 1301, 1285, 1221, 1180, 1161, 1071, 1025, 1009.

HRMS-EI (*m/z*): [M]<sup>+</sup> calcd. for C<sub>20</sub>H<sub>23</sub>O<sub>4</sub>P, 358.1328; found, 358.1328.

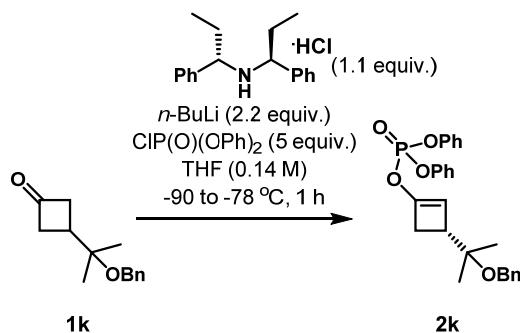

**(R)-3-(2-(Benzyloxy)propan-2-yl)cyclobut-1-en-1-yl diphenyl phosphate (2k)**

According to **General Procedure B**, using **1k** (89.6 mg, 0.410 mmol), CA-9·HCl (0.127 g, 0.440 mmol), *n*-BuLi (2.25 M in hexane, 0.39 mL, 0.880 mmol) and ClP(O)(OPh)<sub>2</sub> (0.42 mL, 0.540 g, 2.00 mmol); flash

chromatography on silica gel (PE:EA = 10:1) afforded **2k** (0.133 g, 0.295 mmol, 74% yield) as a colorless oil. Ee: 90% (Chiralcel® OD-H; 10% *i*-PrOH in hexanes; flow rate = 1.0 mL/min; detection at 210 nm;  $t_1$ =14.0 min (major);  $t_2$ =24.0 min (minor).

$[\alpha]_D^{24}$  7.76 (c 1.0, CHCl<sub>3</sub>).

<sup>1</sup>H NMR (400 MHz, CDCl<sub>3</sub>)  $\delta$  (ppm): 7.31-7.20 (m, 8H), 7.20-7.08 (m, 7H), 5.15 (s, 1H), 4.40 (s, 1H), 2.79-2.67 (m, 2H), 2.62-2.56 (m, 1H), 1.16 (d,  $J$  = 2.0 Hz, 6H).

<sup>13</sup>C NMR (101 MHz, CDCl<sub>3</sub>)  $\delta$  (ppm): 150.26 (d,  $J$  = 7.3 Hz), 142.06 (d,  $J$  = 9.9 Hz), 139.80, 129.85, 128.24, 127.09, 125.62, 120.03 (d,  $J$  = 5.0 Hz), 112.02 (d,  $J$  = 7.8 Hz), 75.47, 64.11, 42.93, 34.88 (d,  $J$  = 5.7 Hz), 22.75, 22.11.

<sup>31</sup>P NMR (162 MHz, CDCl<sub>3</sub>)  $\delta$  (ppm): -18.17.

IR (neat, cm<sup>-1</sup>): 3062, 2973, 2901, 2833, 1786, 1711, 1631, 1590, 1489, 1313, 1220, 1185, 1160, 1054, 1026, 1009.

HRMS-ESI ( $m/z$ ):  $[M+H]^+$  calcd. for C<sub>26</sub>H<sub>28</sub>O<sub>5</sub>P, 451.1671; found, 451.1671.

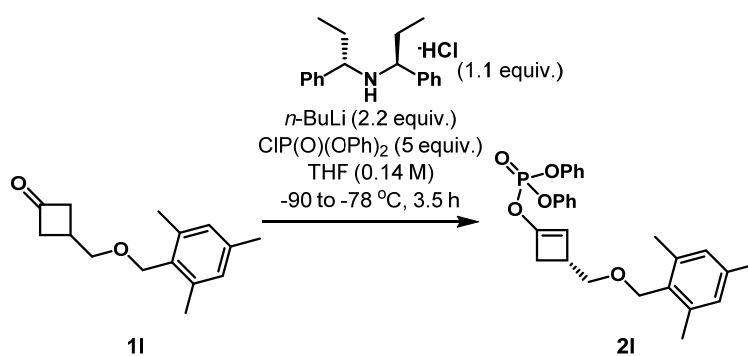

### **(R)-Diphenyl (3-(((2,4,6-trimethylbenzyl)oxy)methyl)cyclobut-1-en-1-yl) phosphate (2I)**

According to **General Procedure B**, using **1I** (93.0 mg, 0.400 mmol), CA-9·HCl (0.127 g, 0.440 mmol), *n*-BuLi (2.25 M in hexane, 0.39 mL, 0.880 mmol) and CIP(O)(OPh)<sub>2</sub> (0.42 mL, 0.540 g, 2.00 mmol); flash chromatography on silica gel (PE:EA = 10:1) afforded **2I** (0.153 g, 0.329 mmol, 83% yield) as a colorless oil. Ee: 81% (Chiralcel® OJ-H; 10% *i*-PrOH in hexanes; flow rate = 1.0 mL/min; detection at 210 nm;  $t_1$ =14.5 min (major);  $t_2$ =16.8 min (minor).

$[\alpha]_D^{24}$  15.80 (c 1.0, CHCl<sub>3</sub>).

$^1\text{H}$  NMR (400 MHz,  $\text{CDCl}_3$ )  $\delta$  (ppm): 7.38-7.29 (m, 4H), 7.25-7.17 (m, 6H), 6.83 (s, 2H), 5.22 (s, 1H), 4.49 (s, 2H), 3.47 (ddd,  $J = 16.6, 9.3, 6.9$  Hz, 2H), 2.90 (ddd,  $J = 13.5, 4.2, 1.4$  Hz, 1H), 2.79-2.69 (m, 1H), 2.40 (d,  $J = 13.5$  Hz, 1H), 2.33 (s, 6H), 2.24 (s, 3H).

$^{13}\text{C}$  NMR (101 MHz,  $\text{CDCl}_3$ )  $\delta$  (ppm): 150.22 (d,  $J = 7.3$  Hz), 141.99 (d,  $J = 9.9$  Hz), 137.69, 137.54, 131.11, 129.83, 128.92, 125.63, 125.62, 120.02 (d,  $J = 4.9$  Hz), 112.38 (d,  $J = 7.9$  Hz), 73.42, 67.13, 36.96 (d,  $J = 5.8$  Hz), 33.57, 20.92, 19.50.

$^{31}\text{P}$  NMR (162 MHz,  $\text{CDCl}_3$ )  $\delta$  (ppm): -18.25.

IR (neat,  $\text{cm}^{-1}$ ): 3069, 2974, 2940, 2901, 2483, 1791, 1716, 1642, 1629, 1590, 1489, 1313, 1302, 1220, 1185, 1161, 1083, 1053, 1026, 1009.

HRMS-ESI ( $m/z$ ):  $[\text{M}+\text{H}]^+$  calcd. for  $\text{C}_{27}\text{H}_{29}\text{O}_5\text{P}$ , 465.1825; found, 465.1825.

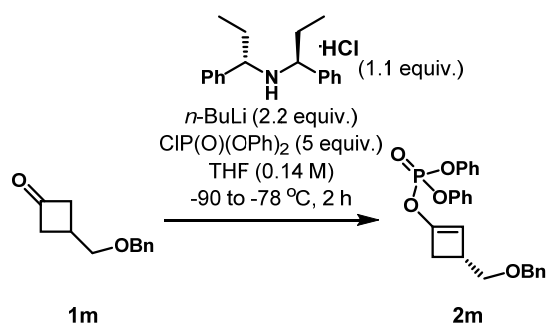

### (*R*)-3-((Benzyloxy)methyl)cyclobut-1-en-1-yl diphenyl phosphate (**2m**)

According to **General Procedure B**, using **1m** (76.1 mg, 0.400 mmol), CA-9-HCl (0.127 g, 0.440 mmol),  $n\text{-BuLi}$  (2.44 M in hexane, 0.36 mL, 0.880 mmol) and  $\text{CIP(O)(OPh)}_2$  (0.42 mL, 0.540 g, 2.00 mmol); flash chromatography on silica gel (PE:EA = 10:1) afforded **2m** (0.136 g, 0.322 mmol, 81% yield) as a colorless oil.

Ee: 83% (Chiralcel® OJ-H; 5% *i*-PrOH in hexanes; flow rate = 1.0 mL/min; detection at 210 nm;  $t_1=27.4$  min (minor);  $t_2=29.2$  min (major)).

$[\alpha]_D^{24}$  20.02 (c 1.0,  $\text{CHCl}_3$ ).

$^1\text{H}$  NMR (400 MHz,  $\text{CDCl}_3$ )  $\delta$  (ppm): 7.38-7.26 (m, 9H), 7.27-7.17 (m, 6H), 5.24 (s, 1H), 4.52 (s, 2H), 3.47 (ddd,  $J = 26.0, 9.4, 7.0$  Hz, 2H), 2.95-2.87 (m, 1H), 2.82-2.73 (m, 1H), 2.43 (d,  $J = 13.5$  Hz, 1H).

$^{13}\text{C}$  NMR (101 MHz,  $\text{CDCl}_3$ )  $\delta$  (ppm): 150.24 (d,  $J = 7.3$  Hz), 142.02 (d,  $J = 9.7$  Hz), 138.29, 129.85, 128.38, 127.65, 127.62, 125.65, 120.04 (d,  $J = 5.0$  Hz), 112.30 (d,  $J = 7.9$  Hz), 73.40, 73.18, 36.86 (d,  $J = 5.8$  Hz), 33.54.

$^{31}\text{P}$  NMR (162 MHz,  $\text{CDCl}_3$ )  $\delta$  (ppm): -18.17.

IR (neat,  $\text{cm}^{-1}$ ): 3062, 3029, 2978, 2936, 2865, 2848, 1783, 1723, 1702, 1641, 1626, 1589, 1488, 1455, 1311, 1301, 1219, 1184, 1160, 1093, 1025, 1009.

HRMS-ESI ( $m/z$ ):  $[\text{M}+\text{H}]^+$  calcd. for  $\text{C}_{24}\text{H}_{24}\text{O}_5\text{P}$ , 423.1356; found, 423.1350.

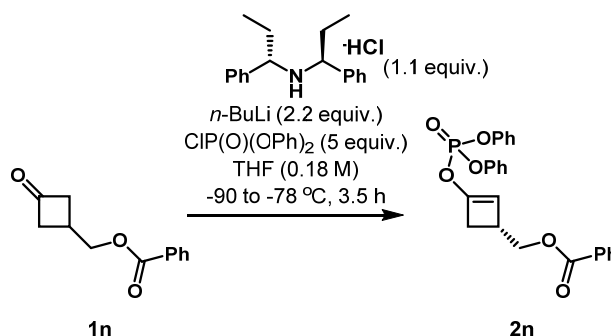

### **(R)-3-((Diphenoxyphosphoryl)oxy)cyclobut-2-en-1-yl)methyl benzoate (2n)**

According to **General Procedure B**, using **1n** (81.8 mg, 0.400 mmol), CA-9-HCl (0.127 g, 0.440 mmol),  $n\text{-BuLi}$  (2.49 M in hexane, 0.35 mL, 0.880 mmol) and  $\text{ClP(O)(OPh)}_2$  (0.42 mL, 0.540 g, 2.00 mmol); flash chromatography on silica gel (PE:EA = 6:1) afforded **2n** (0.110 g, 0.252 mmol, 63% yield) as a colorless oil. Ee: 81% (Chiralcel® OJ-H; 10%  $i\text{-PrOH}$  in hexanes; flow rate = 1.0 mL/min; detection at 210 nm;  $t_1=39.2$  min (major);  $t_2=43.9$  min (minor)).

$[\alpha]_D^{20}$  16.69 (c 0.58,  $\text{CHCl}_3$ ).

$^1\text{H}$  NMR (400 MHz,  $\text{CDCl}_3$ )  $\delta$  (ppm): 8.03 (d,  $J = 7.6$  Hz, 1H), 7.55 (t,  $J = 7.4$  Hz, 1H), 7.41 (t,  $J = 7.7$  Hz, 1H), 7.35 (t,  $J = 7.8$  Hz, 2H), 7.27-7.17 (m, 3H), 5.27 (s, 1H), 4.42-4.27 (m, 1H), 3.05-2.86 (m, 1H), 2.59 (d,  $J = 13.4$  Hz, 1H).

$^{13}\text{C}$  NMR (101 MHz,  $\text{CDCl}_3$ )  $\delta$  (ppm): 166.44, 150.19 (d,  $J = 7.2$  Hz), 142.26 (d,  $J = 9.8$  Hz), 132.96, 130.10, 129.88, 129.57, 128.34, 125.72, 120.01 (d,  $J = 4.9$  Hz), 111.47 (d,  $J = 7.9$  Hz), 67.18, 36.54 (d,  $J = 5.9$  Hz), 32.61.

$^{31}\text{P}$  NMR (162 MHz,  $\text{CDCl}_3$ )  $\delta$  (ppm): -18.25.

IR (neat,  $\text{cm}^{-1}$ ): 3060, 2982, 2949, 2882, 2829, 1716, 1629, 1588, 1488, 1452, 1313, 1269, 1183, 1160, 1110, 1070, 1025, 1009.

HRMS-ESI ( $m/z$ ):  $[\text{M}+\text{H}]^+$  calcd. for  $\text{C}_{24}\text{H}_{22}\text{O}_6\text{P}$ , 437.1149; found, 437.1141.

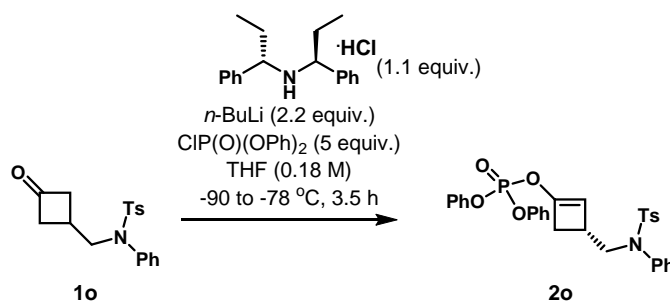

**(R)-3-(((4-Methyl-N-phenylphenyl)sulfonamido)methyl)cyclobut-1-en-1-yl diphenyl phosphate (2o)**

According to **General Procedure B**, using **1o** (0.264 g, 0.800 mmol), CA-9·HCl (0.255 g, 0.880 mmol), *n*-BuLi (2.49 M in hexane, 0.71 mL, 1.76 mmol) and ClP(O)(OPh)<sub>2</sub> (0.84 mL, 1.08 g, 4.00 mmol); flash chromatography on silica gel (PE:Acetone = 6:1) afforded **2o** (0.369g, 0.657 mmol, 82% yield) as a white solid.

Ee: 90% (Chiralcel® IA; 10% *i*-PrOH in hexanes; flow rate = 1.0 mL/min; detection at 210 nm;  $t_1=87.9$  min (major);  $t_2=94.9$  min (minor).

$[\alpha]_D^{23}$  17.12 (c 0.5, CHCl<sub>3</sub>).

<sup>1</sup>H NMR (400 MHz, CDCl<sub>3</sub>) δ (ppm): 7.46 (d,  $J$  = 8.1 Hz, 2H), 7.35 (t,  $J$  = 7.2 Hz, 4H), 7.31-7.27 (m, 3H), 7.25 (d,  $J$  = 4.0 Hz, 2H), 7.21 (t,  $J$  = 8.7 Hz, 6H), 7.05-6.99 (m, 2H), 4.99 (s, 1H), 3.59 (d,  $J$  = 7.1 Hz, 2H), 2.79 (dd,  $J$  = 13.6, 3.7 Hz, 1H), 2.59 (d,  $J$  = 4.5 Hz, 1H), 2.42 (s, 3H), 2.38 (d,  $J$  = 13.7 Hz, 1H).

<sup>13</sup>C NMR (101 MHz, CDCl<sub>3</sub>) δ (ppm): 150.15 (d,  $J$  = 7.3 Hz), 143.41, 141.85 (d,  $J$  = 9.9 Hz), 139.44, 135.23, 129.86, 129.39, 129.06, 128.97, 128.07, 127.66, 125.67, 119.99 (d,  $J$  = 4.9 Hz), 112.21 (d,  $J$  = 7.9 Hz), 54.58, 37.13 (d,  $J$  = 5.9 Hz), 33.12, 21.52.

<sup>31</sup>P NMR (162 MHz, CDCl<sub>3</sub>) δ (ppm): -18.32.

IR (neat, cm<sup>-1</sup>): 3060, 2839, 2796, 1794, 1639, 1626, 1588, 1489, 1349, 1337, 1302, 1278, 1222, 1187, 1181, 1163, 1027, 1009.

HRMS-ESI ( $m/z$ ):  $[M+H]^+$  calcd. for C<sub>30</sub>H<sub>28</sub>NO<sub>6</sub>PS, 562.1448; found, 562.1445.

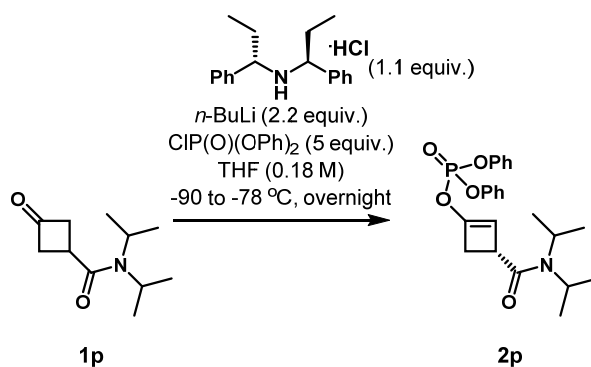

**(R)-3-(Diisopropylcarbamoyl)cyclobut-1-en-1-yl diphenyl phosphate (2p)**

According to **General Procedure B**, using **1p** (79.0 mg, 0.400 mmol), CA-9·HCl (0.127 g, 0.440 mmol), *n*-BuLi (2.25 M in hexane, 0.39 mL, 0.880 mmol) and CIP(O)(OPh)<sub>2</sub> (0.42 mL, 0.540 g, 2.00 mmol); flash chromatography on silica gel (PE:Acetone = 7:1) afforded **2p** (86.8 mg, 0.202 mmol, 51% yield) as a colorless oil.

Ee: 70% (Chiralcel® IA; 3% *i*-PrOH in hexanes; flow rate = 1.0 mL/min; detection at 210 nm; t<sub>1</sub>=53.7 min (minor); t<sub>2</sub>=57.7 min (major).

[α]<sub>D</sub><sup>19</sup> 14.40 (c 1.0, CHCl<sub>3</sub>).

<sup>1</sup>H NMR (400 MHz, CDCl<sub>3</sub>) δ (ppm): 7.44-7.30 (m, 4H), 7.30-7.16 (m, 6H), 5.47 (s, 1H), 3.83-3.70 (m, 1H), 3.34-3.21 (m, 1H), 3.17 (d, *J* = 12.8 Hz, 1H), 2.64 (d, *J* = 12.8 Hz, 1H), 1.45 (s, 3H), 1.40 (t, *J* = 6.1 Hz, 6H), 1.22-1.14 (dd, *J* = 6.3, 2.7 Hz, 6H).

<sup>13</sup>C NMR (101 MHz, CDCl<sub>3</sub>) δ (ppm): 170.19, 150.14 (d, *J* = 7.5 Hz), 150.10 (d, *J* = 7.5 Hz), 142.18 (d, *J* = 9.5 Hz), 129.82, 125.67, 125.66, 120.06 (d, *J* = 4.9 Hz), 120.05 (d, *J* = 4.9 Hz), 110.63 (d, *J* = 8.3 Hz), 48.11, 45.68, 37.29, 36.83 (d, *J* = 5.7 Hz), 20.81 (d, *J* = 5.5 Hz), 20.46 (d, *J* = 5.8 Hz).

<sup>31</sup>P NMR (162 MHz, CDCl<sub>3</sub>) δ (ppm): -18.31.

IR (neat, cm<sup>-1</sup>): 3096, 3068, 2999, 2966, 2932, 2873, 1632, 1589, 1488, 1440, 1371, 1342, 1313, 1301, 1269, 1216, 1282, 1160, 1315, 1072, 1025, 1009.

HRMS-EI (*m/z*): [M]<sup>+</sup> calcd. for C<sub>23</sub>H<sub>28</sub>NO<sub>5</sub>P, 429.1700; found, 429.1700.

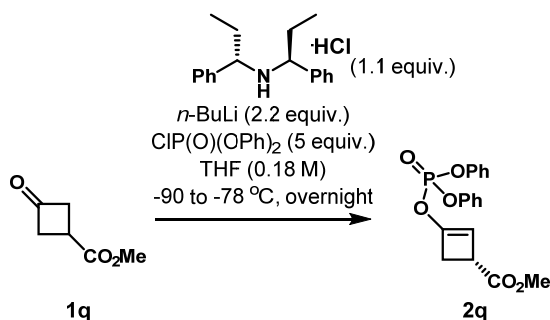

### Methyl (*R*)-3-((diphenoxyphosphoryl)oxy)cyclobut-2-ene-1-carboxylate (**2q**)

According to **General Procedure B**, using **1q** (51.3 mg, 0.400 mmol), CA-9·HCl (0.127 g, 0.440 mmol), *n*-BuLi (2.25 M in hexane, 0.39 mL, 0.880 mmol) and ClP(O)(OPh)<sub>2</sub> (0.42 mL, 0.540 g, 2.00 mmol); flash chromatography on silica gel (PE:Acetone = 5:1) afforded **2q** (0.118 g, 0.327 mmol, 82% yield) as a colorless oil.

Ee: 47% (Chiralcel® IC; 10% *i*-PrOH in hexanes; flow rate = 1.0 mL/min; detection at 210 nm; t<sub>1</sub>=33.0 min (major); t<sub>2</sub>=37.2 min (minor).

[α]<sub>D</sub><sup>22</sup> 22.84 (c 1.0, CHCl<sub>3</sub>).

<sup>1</sup>H NMR (400 MHz, CDCl<sub>3</sub>) δ (ppm): 7.40 (7.40-7.33, 4H), 7.29-7.19 (m, 6H), 5.25 (s, 1H), 3.70 (s, 3H), 3.34-3.29 (m, 1H), 3.11-2.92 (m, 2H).

<sup>13</sup>C NMR (101 MHz, CDCl<sub>3</sub>) δ (ppm): 173.17, 150.14 (d, *J* = 7.4 Hz), 150.12 (d, *J* = 7.4 Hz), 150.11, 150.08, 143.58 (d, *J* = 9.5 Hz), 129.91, 125.80, 120.05 (d, *J* = 4.9 Hz), 109.98 (d, *J* = 8.1 Hz), 51.99, 37.13 (d, *J* = 6.2 Hz), 36.33.

<sup>31</sup>P NMR (162 MHz, CDCl<sub>3</sub>) δ (ppm): -18.46.

IR (neat, cm<sup>-1</sup>): 3075, 2952, 2844, 1735, 1648, 1634, 1590, 1488, 1457, 1436, 1340, 1302, 1222, 1183, 1161, 1072, 1026, 1010.

HRMS-ESI (*m/z*): [M+H]<sup>+</sup> calcd. for C<sub>18</sub>H<sub>18</sub>O<sub>6</sub>P, 361.0836; found, 361.0831.

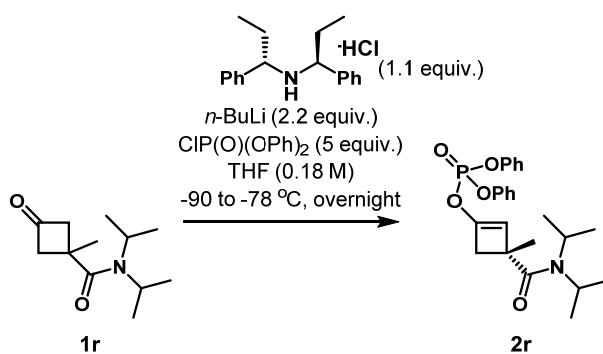

### (*R*)-3-(Diisopropylcarbamoyl)-3-methylcyclobut-1-en-1-yl diphenyl phosphate (**2r**)

According to **General Procedure B**, using **1r** (84.7 mg, 0.400 mmol), CA-9·HCl (0.127 g, 0.440 mmol), *n*-BuLi (2.49 M in hexane, 0.35 mL, 0.880 mmol) and ClP(O)(OPh)<sub>2</sub> (0.42 mL, 0.540 g, 2.00 mmol); flash chromatography on silica gel (PE:Acetone = 7:1) afforded **2r** (0.160 g, 0.361 mmol, 90% yield) as a colorless oil.

Ee: 17% (Chiralcel® OZ-H; 10% *i*-PrOH in hexanes; flow rate = 1.0 mL/min; detection at 210 nm;  $t_1$ =14.9 min (major);  $t_2$ =32.2 min (minor).

$[\alpha]_D^{17}$  -4.42 (c 1.0, CHCl<sub>3</sub>).

<sup>1</sup>H NMR (400 MHz, CDCl<sub>3</sub>)  $\delta$  (ppm): 7.40-7.30 (m, 4H), 7.30-7.15 (m, 6H), 5.47 (s, 1H), 3.85-3.68 (m, 1H), 3.33-3.21 (m, 1H), 3.17 (d,  $J$  = 12.8 Hz, 1H), 2.64 (dd,  $J$  = 12.8, 1.1 Hz, 1H), 1.44 (d,  $J$  = 8.1 Hz, 3H), 1.40 (t,  $J$  = 6.2 Hz, 6H), 1.21-1.13 (m, 6H).

<sup>13</sup>C NMR (101 MHz, CDCl<sub>3</sub>)  $\delta$  (ppm): 172.64, 150.11 (d,  $J$  = 7.4 Hz), 150.06 (d,  $J$  = 7.3 Hz), 141.24 (d,  $J$  = 9.0 Hz), 129.79, 125.64, 125.63, 120.02 (d,  $J$  = 4.9 Hz), 119.99 (d,  $J$  = 4.8 Hz), 116.63 (d,  $J$  = 8.2 Hz), 48.50, 45.89, 44.44, 44.23 (d,  $J$  = 5.3 Hz), 22.82, 20.46, 20.43, 20.27, 20.23.

<sup>31</sup>P NMR (162 MHz, CDCl<sub>3</sub>)  $\delta$  (ppm): -18.24.

IR (neat, cm<sup>-1</sup>): 3064, 2979, 2921, 1659, 1628, 1587, 1488, 1345, 1329, 1290, 1266, 1215, 1185, 1166, 1085, 1070, 1037, 1027, 1009.

HRMS-EI ( $m/z$ ): [M]<sup>+</sup> calcd. for C<sub>24</sub>H<sub>30</sub>NO<sub>5</sub>P, 443.1856; found, 443.1858.

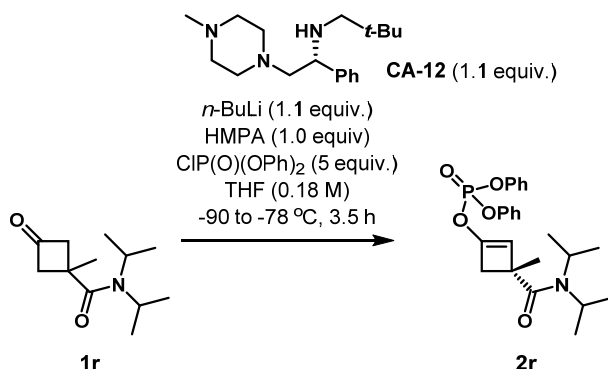

### (*R*)-3-(Diisopropylcarbamoyl)-3-methylcyclobut-1-en-1-yl diphenyl phosphate (**2r**)

According to **General Procedure B**, using **1r** (84.5 mg, 0.400 mmol), CA-12 (0.127 g, 0.440 mmol), HMPA (70.0  $\mu$ L, 0.400 mmol) as co-solvent, *n*-BuLi (2.50 M in hexane, 0.18 mL, 0.440 mmol) and CIP(O)(OPh)<sub>2</sub> (0.42 mL, 0.540 g, 2.00 mmol); flash chromatography on silica gel (PE:Acetone = 7:1) afforded **2r** (0.118 g, 0.265 mmol, 66% yield) as a colorless oil.

Ee: 62% (Chiralcel® OZ-H; 10% *i*-PrOH in hexanes; flow rate = 1.0 mL/min; detection at 210 nm;  $t_1$ =14.9 min (major);  $t_2$ =32.2 min (minor).

$[\alpha]_D^{18}$  -12.54 (c 1.0, CHCl<sub>3</sub>).



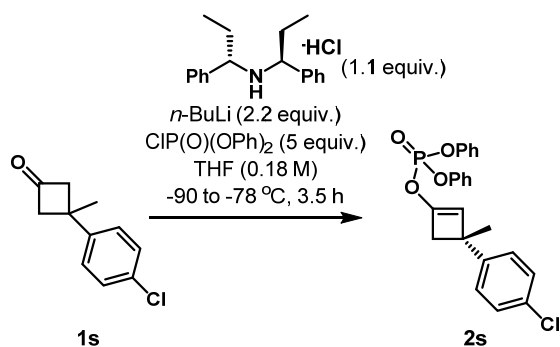

**(R)-3-(4-Chlorophenyl)-3-methylcyclobut-1-en-1-yl diphenyl phosphate (2s)**

According to **General Procedure B**, using **1s** (135.8 mg, 0.400 mmol), CA-9·HCl (77.9 mg, 0.440 mmol), *n*-BuLi (2.25 M in hexane, 0.39 mL, 0.880 mmol) and CIP(O)(OPh)<sub>2</sub> (0.42 mL, 0.540 g, 2.00 mmol); flash chromatography on silica gel (PE:EA = 10:1) afforded **2s** (0.133 g, 0.312 mmol, 78% yield) as a colorless oil. Ee: 10% (Chiralcel® OJ-H; 10% *i*-PrOH in hexanes; flow rate = 1.0 mL/min; detection at 210 nm; t<sub>1</sub>=11.6 min (minor); t<sub>2</sub>=21.5 min (major)).

[α]<sub>D</sub><sup>22</sup> 1.56 (c 0.5, CHCl<sub>3</sub>).

<sup>1</sup>H NMR (400 MHz, CDCl<sub>3</sub>) δ (ppm): 7.35 (t, *J* = 7.9 Hz, 4H), 7.30-7.18 (m, 10H), 5.55 (s, 1H), 2.95-2.76 (m, 2H), 1.53 (s, 3H).

<sup>13</sup>C NMR (101 MHz, CDCl<sub>3</sub>) δ (ppm): 150.23 (d, *J* = 7.4 Hz), 150.21 (d, *J* = 7.2 Hz), 144.66, 141.86 (d, *J* = 9.8 Hz), 131.85, 129.88, 128.23, 127.33, 125.72, 125.71, 120.03 (d, *J* = 4.9 Hz), 117.38 (d, *J* = 7.6 Hz), 48.60 (d, *J* = 5.6 Hz), 41.60, 26.87.

<sup>31</sup>P NMR (162 MHz, CDCl<sub>3</sub>) δ (ppm): -18.12.

IR (neat, cm<sup>-1</sup>): 3062, 2973, 2892, 2834, 1781, 1722, 1648, 1633, 1590, 1488, 1312, 1301, 1286, 1206, 1184, 1161, 1088, 1073, 1026, 1010.

HRMS-ESI (*m/z*): [M+H]<sup>+</sup> calcd. for C<sub>23</sub>H<sub>20</sub>ClO<sub>4</sub>P, 427.0860; found, 427.0858.

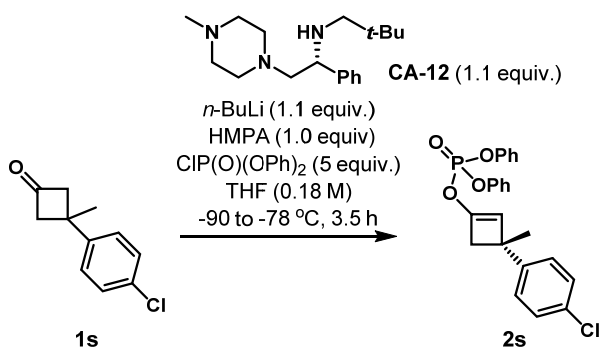

### (*R*)-3-(4-Chlorophenyl)-3-methylcyclobut-1-en-1-yl diphenyl phosphate (**2s**)

According to **General Procedure B**, using **1s** (77.9 mg, 0.400 mmol), CA-12 (0.127 g, 0.440 mmol), HMPA (70.0  $\mu$ L, 0.400 mmol) as co-solvent, *n*-BuLi (2.50 M in hexane, 0.18 mL, 0.440 mmol) and ClP(O)(OPh)<sub>2</sub> (0.42 mL, 0.540 g, 2.00 mmol); flash chromatography on silica gel (PE:EA = 10:1) afforded **2s** (0.123 g, 0.287 mmol, 72% yield) as a colorless oil.

Ee: 63% (Chiralcel® OJ-H; 10% *i*-PrOH in hexanes; flow rate = 1.0 mL/min; detection at 210 nm;  $t_1$ =11.6 min (minor);  $t_2$ =21.5 min (major).

$[\alpha]_D^{21}$  15.18 (c 1.0, CHCl<sub>3</sub>).

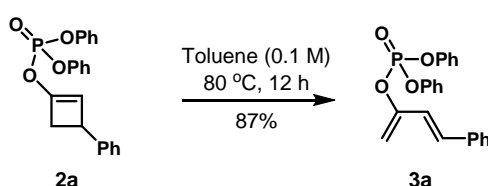

### (*E*)-Diphenyl (4-phenylbuta-1,3-dien-2-yl) phosphate (**3a**)

A solution of **2a** (37.8 mg, 0.100 mmol) in toluene (1.0 mL) was stirred at 80 °C for 12 h. After cooling, the mixture was concentrated, and purified by column chromatography on silica gel (PE:EA = 5:1) to afford the product **3a** (32.7 mg, 86.4  $\mu$ mol, 87% yield) as a faint yellow oil.

<sup>1</sup>H NMR (400 MHz, CDCl<sub>3</sub>)  $\delta$  (ppm): 7.41-7.19 (m, 15H), 6.66 (d,  $J$  = 15.8 Hz, 1H), 6.54 (dd,  $J$  = 15.8, 2.6 Hz, 1H), 5.25 (t,  $J$  = 2.2 Hz, 1H), 4.95 (t,  $J$  = 2.5 Hz, 1H).

<sup>13</sup>C NMR (101 MHz, CDCl<sub>3</sub>)  $\delta$  (ppm): 151.34 (d,  $J$  = 8.1 Hz), 150.51 (d,  $J$  = 7.5 Hz), 135.74, 131.13, 129.85, 128.63, 128.37, 126.90, 125.62 (d,  $J$  = 1.1 Hz), 121.84 (d,  $J$  = 6.9 Hz), 120.20 (d,  $J$  = 4.9 Hz), 102.18 (d,  $J$  = 3.5 Hz).

<sup>31</sup>P NMR (162 MHz, CDCl<sub>3</sub>)  $\delta$  (ppm): -17.93.

IR (neat, cm<sup>-1</sup>): 3062, 3026, 2246, 1948, 1817, 1750, 1639, 1589, 1488, 1449, 1298, 1274, 1214, 1184, 1161, 1072, 1009.

HRMS-ESI ( $m/z$ ): [M+H]<sup>+</sup> calcd. for C<sub>22</sub>H<sub>20</sub>O<sub>4</sub>P, 379.1094; found, 379.1091.

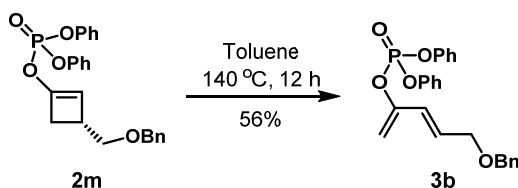

### (*E*)-5-(Benzyloxy)penta-1,3-dien-2-yl diphenyl phosphate (**3b**)

A solution of **2m** (42.2 mg, 0.100 mmol) in toluene (1.0 mL) was stirred at 140 °C for 20 h. After cooling, the mixture was concentrated, and purified by column chromatography on silica gel (PE:EA = 10:1) to afford the product **3b** (23.8 mg, 56.3 μmol, 56% yield) as a colorless oil.

<sup>1</sup>H NMR (400 MHz, CDCl<sub>3</sub>) δ (ppm): 7.42-7.15 (m, 15H), 6.22-6.12 (m, 1H), 5.99 (dt, *J* = 15.5, 5.1 Hz, 1H), 5.17 (s, 1H), 4.84 (t, *J* = 2.2 Hz, 1H), 4.50 (s, 2H), 4.09-3.99 (m, 2H).

<sup>13</sup>C NMR (101 MHz, CDCl<sub>3</sub>) δ (ppm): 150.71 (d, *J* = 8.1 Hz), 150.46 (d, *J* = 7.4 Hz), 137.99, 129.82, 129.35, 128.41, 127.70, 127.66, 125.56 (d, *J* = 1.1 Hz), 124.89 (d, *J* = 6.8 Hz), 120.15 (d, *J* = 4.9 Hz), 101.79, 72.38, 69.22.

<sup>31</sup>P NMR (162 MHz, CDCl<sub>3</sub>) δ (ppm): -17.88.

IR (neat, cm<sup>-1</sup>): 3063, 3030, 2850, 2790, 1955, 1809, 1725, 1662, 1610, 1589, 1488, 1455, 1360, 1300, 1271, 1211, 1185, 1162, 1115, 1071, 1009.

HRMS-EI (*m/z*): [M]<sup>+</sup> calcd. for C<sub>24</sub>H<sub>24</sub>O<sub>5</sub>P, 423.1356; found, 423.1354.

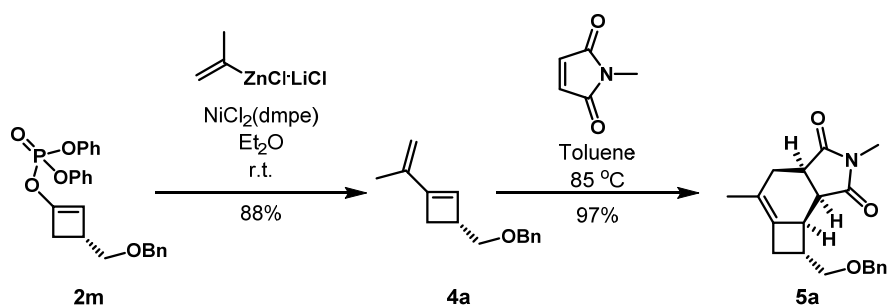

**(3aR,7R,7aR,7bS)-7-((Benzyloxy)methyl)-2,5-dimethyl-3a,4,6,7,7a,7b-hexahydro-1H-cyclobuta[e]isoindole-1,3(2H)-dione (5a)**

A flame-dried 10 mL screw tube was charged with NiCl<sub>2</sub>(dmpe) (9.9 mg, 35.5 μmol), and a solution of **2m** (0.300 g, 0.710 mmol) in Et<sub>2</sub>O (4 mL+3 mL) and prop-1-en-2-ylzinc (0.51 M in THF, 2.00 mL, 1.07 mmol) were added sequentially at 0 °C. After stirring for 3 h at room temperature, the reaction mixture was quenched with a saturated aqueous solution of NH<sub>4</sub>Cl, diluted with H<sub>2</sub>O, extracted with Et<sub>2</sub>O. The combined organic phase was washed with brine, dried over Na<sub>2</sub>SO<sub>4</sub>, concentrated, and purified by column chromatography on silica gel (PE:EA = 98:2) to afford **4a** (0.134 g, 0.624 mmol, 88% yield) as a colorless oil.

[α]<sub>D</sub><sup>23</sup> 117.26 (c 0.71, CHCl<sub>3</sub>).

$^1\text{H}$  NMR (400 MHz,  $\text{CDCl}_3$ )  $\delta$  (ppm): 7.35 (d,  $J = 4.4$  Hz, 4H), 7.31-7.27 (m, 1H), 6.00 (s, 1H), 4.89 (d,  $J = 12.4$  Hz, 2H), 4.54 (s, 2H), 3.65-3.36 (m, 2H), 2.97 (dd,  $J = 11.9, 6.3$  Hz, 1H), 2.73 (dd,  $J = 13.0, 4.5$  Hz, 1H), 2.23 (dd,  $J = 13.0, 1.6$  Hz, 1H), 1.82 (s, 3H).

$^{13}\text{C}$  NMR (101 MHz,  $\text{CDCl}_3$ )  $\delta$  (ppm): 148.69, 138.95, 138.57, 129.35, 128.35, 127.66, 127.51, 112.19, 74.08, 73.12, 37.77, 31.98, 17.59.

IR (neat,  $\text{cm}^{-1}$ ): 3086, 3064, 3031, 2943, 2917, 2851, 1583, 1496, 1453, 1435, 1375, 1361, 1141, 1094, 1028.

HRMS-EI ( $m/z$ ):  $[\text{M}]^+$  calcd. for  $\text{C}_{15}\text{H}_{18}\text{O}$ , 214.1352; found, 214.1357.

A solution of **4a** (0.134 g, 0.624 mmol) and *N*-methylmaleimide (0.138 g, 1.240 mmol) in toluene (7 ml) was stirred at 85 °C for 48 h. The mixture was then concentrated, and purified by column chromatography on silica gel (DCM to PE:EA = 3:1) to afford the product **5a** (0.195 g, 0.600 mmol, 97% yield) as a colorless oil.

$[\alpha]_D^{23}$  23.76 (c 0.50,  $\text{CHCl}_3$ ).

$^1\text{H}$  NMR (400 MHz,  $\text{CDCl}_3$ )  $\delta$  (ppm): 7.39-7.27 (m, 5H), 4.56 (q,  $J = 12.0$  Hz, 2H), 3.59 (ddd,  $J = 15.2, 9.7, 4.9$  Hz, 2H), 3.18 (dd,  $J = 11.1, 8.6$  Hz, 1H), 3.10-2.98 (m, 1H), 2.97 (s, 3H), 2.96-2.91 (m, 1H), 2.64-2.38 (m, 4H), 2.17-2.05 (m, 1H), 1.58 (s, 3H).

$^{13}\text{C}$  NMR (101 MHz,  $\text{CDCl}_3$ )  $\delta$  (ppm): 180.04, 178.04, 138.63, 131.29, 128.30, 127.57, 127.45, 122.17, 72.84, 72.54, 41.93, 40.66, 39.75, 37.93, 29.82, 27.03, 24.86, 17.76.

IR (neat,  $\text{cm}^{-1}$ ): 2972, 2942, 2901, 2846, 1773, 1694, 1592, 1492, 1432, 1382, 1314, 1282, 1189, 1163, 1063, 1075, 1052, 1027.

HRMS-ESI ( $m/z$ ):  $[\text{M}+\text{H}]^+$  calcd. for  $\text{C}_{20}\text{H}_{24}\text{O}_3\text{P}$ , 326.1751; found, 326.1751.

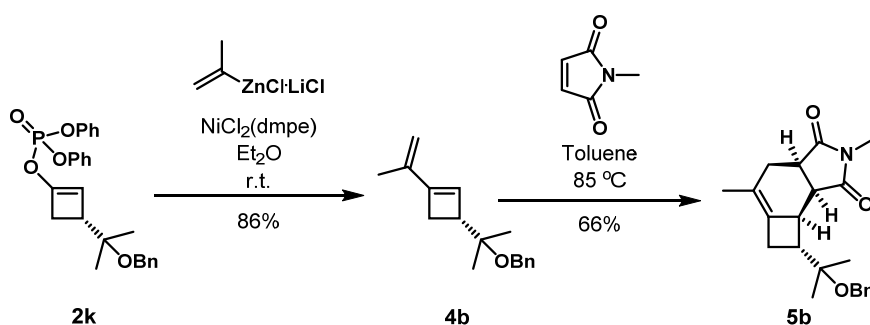

**(3a*R*,7*R*,7a*R*,7b*S*)-7-(2-(Benzyloxy)propan-2-yl)-2,5-dimethyl-3a,4,6,7,7a,7b-hexahydro-1*H*-cyclobuta[*e*]isoindole-1,3(2*H*)-dione (5b)**

A flame-dried 10 mL screw tube was charged with  $\text{NiCl}_2(\text{dmpe})$  (2.8 mg, 10.0  $\mu\text{mol}$ ), and a solution of **2k** (0.103 g, 0.229 mmol) in  $\text{Et}_2\text{O}$  (1 mL+1 mL) and prop-1-en-2-ylzinc (0.51 M in THF, 0.67 mL, 0.334 mmol) were added sequentially at 0 °C. After stirring for 3 h at room temperature, the reaction mixture was quenched

with a saturated aqueous solution of  $\text{NH}_4\text{Cl}$ , diluted with  $\text{H}_2\text{O}$ , extracted with  $\text{Et}_2\text{O}$ . The combined organic phase was washed with brine, dried over  $\text{Na}_2\text{SO}_4$ , concentrated, and purified by column chromatography on silica gel (PE:EA = 98:2) to afford **4b** (47.5 mg, 0.196 mmol, 86% yield) as a colorless oil.

$[\alpha]_{\text{D}}^{18}$  37.28 (c 0.50,  $\text{CHCl}_3$ ).

$^1\text{H}$  NMR (400 MHz,  $\text{CDCl}_3$ )  $\delta$  (ppm): 7.38-7.29 (m, 4H), 7.26-7.21 (m, 6H), 5.98 (s, 1H), 4.90 (d,  $J = 13.4$  Hz, 2H), 4.55-4.47 (m, 2H), 2.99 (d,  $J = 4.2$  Hz, 1H), 2.60 (dd,  $J = 12.9, 4.7$  Hz, 1H), 2.44 (dd,  $J = 12.9, 2.0$  Hz, 1H), 1.84 (s, 3H), 1.25 (d,  $J = 2.7$  Hz, 6H).

$^{13}\text{C}$  NMR (101 MHz,  $\text{CDCl}_3$ )  $\delta$  148.47, 140.08, 138.84, 129.32, 128.22, 127.19, 127.02, 111.98, 76.21, 64.20, 46.91, 30.19, 22.97, 22.32, 17.69.

IR (neat,  $\text{cm}^{-1}$ ): 3081, 3055, 3034, 2972, 2919, 2887, 1582, 1453, 1382, 1363, 1266, 1235, 1145, 1085, 1061, 1028.

HRMS-ESI ( $m/z$ ):  $[\text{M}+\text{H}]^+$  calcd. for  $\text{C}_{17}\text{H}_{23}\text{O}_3$ , 243.1743; found, 243.1740.

A solution of **4b** (47.5 mg, 0.196 mmol) and *N*-methylmaleimide (48.0 mg, 0.430 mmol) in toluene (2 ml) was stirred at 85 °C for 20 h. The mixture was then concentrated, and purified by column chromatography on silica gel (DCM to PE:EA = 5:1) to afford the product **5b** (46.5 mg, 0.132 mmol, 66% yield) as a colorless oil.

$[\alpha]_{\text{D}}^{18}$  -6.21 (c 1.04,  $\text{CHCl}_3$ ).

$^1\text{H}$  NMR (400 MHz,  $\text{CDCl}_3$ )  $\delta$  (ppm): 7.38-7.30 (m, 4H), 7.28-7.22 (m, 1H), 4.50 (dd,  $J = 16.0, 12.0$  Hz, 2H), 3.23-3.14 (m, 1H), 3.11 (t,  $J = 9.5$  Hz, 1H), 3.07-3.02 (m, 1H), 2.97 (s, 3H), 2.79-2.70 (m, 1H), 2.59-2.37 (m, 3H), 2.17-2.07 (m, 1H), 1.57 (s, 3H), 1.35 (s, 3H), 1.21 (s, 3H).

$^{13}\text{C}$  NMR (101 MHz,  $\text{CDCl}_3$ )  $\delta$  (ppm): 180.21, 178.19, 140.30, 131.32, 128.16, 126.96, 126.91, 122.13, 74.66, 63.49, 47.28, 42.18, 41.33, 37.82, 27.70, 26.60, 24.94, 23.03, 22.53, 17.69.

IR (neat,  $\text{cm}^{-1}$ ): 3088, 3062, 3030, 2968, 2929, 2908, 2868, 2852, 2728, 1772, 1696, 1497, 1434, 1383, 1364, 1319, 1283, 1243, 1212, 1163, 1132, 1089, 1059, 1027.

HRMS-ESI ( $m/z$ ):  $[\text{M}+\text{H}]^+$  calcd. for  $\text{C}_{22}\text{H}_{28}\text{NO}_3$ , 354.2064; found, 354.2064.

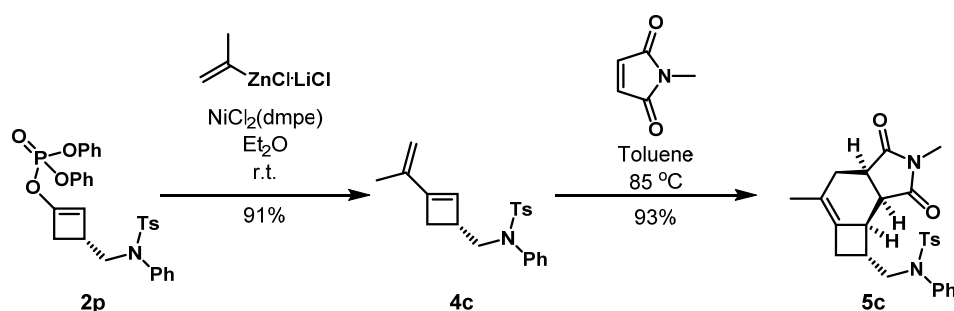

***N*-(((3*aR*,7*R*,7*aR*,7*bS*)-2,5-Dimethyl-1,3-dioxo-2,3,3*a*,4,6,7,7*a*,7*b*-octahydro-1*H*-cyclobuta[*e*]isoindol-7-yl)methyl)-4-methyl-*N*-phenylbenzenesulfonamide (**5c**)**

A flame-dried 10 mL screw tube was charged with NiCl<sub>2</sub>(dmpe) (3.5 mg, 12.5 μmol), and a solution of **2p** (0.125 g, 0.250 mmol) in Et<sub>2</sub>O (2 mL+1 mL) and prop-1-en-2-ylzinc (0.51 M in THF, 0.73 mL, 0.325 mmol) were added at 0 °C. After stirring for 3 h at room temperature, the reaction mixture was quenched with a saturated aqueous solution of NH<sub>4</sub>Cl, diluted with H<sub>2</sub>O, extracted with Et<sub>2</sub>O. The combined organic phase was washed with brine, dried over Na<sub>2</sub>SO<sub>4</sub>, concentrated, and purified by column chromatography on silica gel (PE:EA =5:1) to afford **4c** (72.0 mg, 0.204 mmol, 91% yield) as a white solid.

[α]<sub>D</sub><sup>23</sup> 79.39 (c 0.82, CHCl<sub>3</sub>).

<sup>1</sup>H NMR (400 MHz, CDCl<sub>3</sub>) δ (ppm): 7.50-7.46 (m, 2H), 7.32-7.28 (m, 3H), 7.24 (d, *J* = 8.5 Hz, 2H), 7.07-7.02 (m, 2H), 5.70 (s, 1H), 4.84 (s, 2H), 3.63 (dd, *J* = 7.3, 1.4 Hz, 2H), 2.80-2.68 (m, 1H), 2.57 (dd, *J* = 13.0, 4.5 Hz, 1H), 2.42 (s, 3H), 2.17 (dd, *J* = 13.1, 1.7 Hz, 1H), 1.74 (s, 3H).

<sup>13</sup>C NMR (101 MHz, CDCl<sub>3</sub>) δ 148.30, 143.23, 139.60, 138.67, 135.48, 129.34, 129.07, 129.00, 128.93, 127.92, 127.70, 112.55, 54.76, 36.98, 32.25, 21.53, 17.52.

IR (neat, cm<sup>-1</sup>): 3064, 3034, 2981, 2943, 2900, 2822, 1581, 1487, 1347, 1163, 1090, 1061, 1043.

HRMS-EI (*m/z*): [M]<sup>+</sup> calcd. for C<sub>21</sub>H<sub>23</sub>NO<sub>2</sub>S, 353.1444; found, 353.1440.

A solution of **4c** (72.0 mg, 0.204 mmol) and *N*-methylmaleimide (44.0 mg, 0.396 mmol) in toluene (5 ml) was stirred at 85 °C for 25 h. The mixture was then concentrated, and purified by column chromatography on silica gel (DCM to PE:EA = 2:1) to afford the product **5c** (86.6 mg, 0.186 mmol, 93% yield) as a white solid.

[α]<sub>D</sub><sup>25</sup> -48.86 (c 1.0, CHCl<sub>3</sub>).

<sup>1</sup>H NMR (400 MHz, CDCl<sub>3</sub>) δ (ppm): 7.40-7.35 (m, 2H), 7.26-7.16 (m, 6H), 7.03-6.98 (m, 2H), 3.63 (ddd, *J* = 18.3, 12.9, 7.3 Hz, 2H), 3.05-2.95 (m, 1H), 2.94-2.87 (m, 1H), 2.79-2.71 (m, 1H), 2.69 (s, 3H), 2.42-2.33 (m, 5H), 2.31-2.20 (m, 1H), 2.09-1.88 (m, 2H), 1.46 (s, 3H).

<sup>13</sup>C NMR (101 MHz, CDCl<sub>3</sub>) δ (ppm): 179.73, 177.76, 143.35, 138.94, 134.82, 130.13, 129.35, 128.76, 128.63, 127.75, 127.71, 122.12, 54.00, 41.70, 41.64, 40.36, 37.02, 31.37, 26.71, 24.62, 21.51, 17.82.

IR (neat, cm<sup>-1</sup>): 3061, 3045, 2974, 2943, 2900, 2840, 1774, 1696, 1594, 1492, 1432, 1381, 1345, 1305, 1188, 1161, 1091, 1050, 1026.

HRMS-ESI (*m/z*): [M+H]<sup>+</sup> calcd. for C<sub>26</sub>H<sub>29</sub>N<sub>2</sub>O<sub>4</sub>, 465.1843; found, 465.1842.

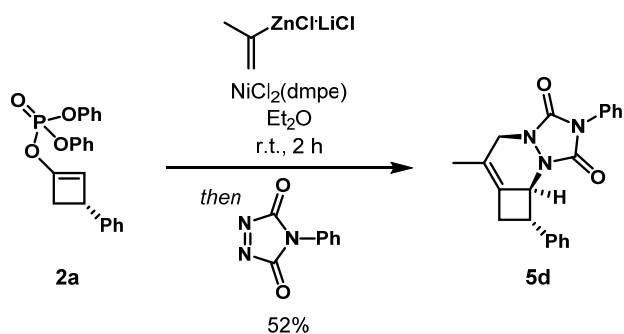

**(8*S*,8*aS*)-6-Methyl-2,8-diphenyl-5,7,8,8*a*-tetrahydro-1*H*-cyclobuta[*c*][1,2,4]triazolo[1,2-*a*]pyridazine-1,3(2*H*)-dione (**5d**)**

A flame-dried 10 mL screw tube was charged with  $\text{NiCl}_2(\text{dmpe})$  (1.3 mg, 4.5  $\mu\text{mol}$ ), and a solution of **2a** (34.2 mg, 90.0  $\mu\text{mol}$ ) in  $\text{Et}_2\text{O}$  (0.3 mL+0.2 mL) and prop-1-en-2-ylzinc (0.52 M in THF, 0.26 mL, 0.135 mmol) were added sequentially at room temperature. After stirring for 2 h, 4-phenyl-1,2,4-triazolidine-3,5-dione (47.3 mg, 0.270 mmol) in DCM (0.5 mL+0.5 mL) was added. After stirring overnight, the mixture was quenched with a saturated aqueous solution of  $\text{NH}_4\text{Cl}$ , diluted with  $\text{H}_2\text{O}$ , and extracted with EA. The combined organic phase was washed with brine, dried over  $\text{Na}_2\text{SO}_4$ , concentrated, and purified by column chromatography on silica gel (PE:EA =3:1) to afford **5d** (16.2 mg, 46.9  $\mu\text{mol}$ , 52% yield) as a white solid.

$[\alpha]_D^{13}$  -262.29 (c 0.59,  $\text{CHCl}_3$ ).

$^1\text{H}$  NMR (400 MHz,  $\text{CDCl}_3$ )  $\delta$  (ppm): 7.56 (d,  $J = 7.6$  Hz, 2H), 7.53-7.48 (m, 2H), 7.48-7.42 (m, 2H), 7.38-7.32 (m, 3H), 7.26-7.22 (m, 1H), 4.70-4.61 (m, 1H), 4.37 (d,  $J = 15.8$  Hz, 1H), 3.95 (d,  $J = 15.8$  Hz, 1H), 3.71 (dd,  $J = 15.9, 8.7$  Hz, 1H), 3.32-3.21 (m, 1H), 3.06-2.95 (m, 1H), 1.82 (s, 3H).

$^{13}\text{C}$  NMR (101 MHz,  $\text{CDCl}_3$ )  $\delta$  (ppm): 152.99, 151.03, 140.58, 131.10, 129.09, 128.41, 128.05, 127.06, 126.87, 125.50, 124.07, 118.12, 62.51, 46.56, 44.72, 34.92, 14.66.

IR (neat,  $\text{cm}^{-1}$ ): 3077, 3061, 3031, 2970, 2935, 2893, 2868, 2839, 1801, 1772, 1706, 1600, 1502, 1456, 1412, 1381, 1361, 1330, 1278, 1245, 1177, 1133, 1067, 1031.

HRMS-ESI ( $m/z$ ):  $[\text{M}+\text{H}]^+$  calcd. for  $\text{C}_{21}\text{H}_{20}\text{N}_3\text{O}_2$ , 346.1550; found, 346.1547.

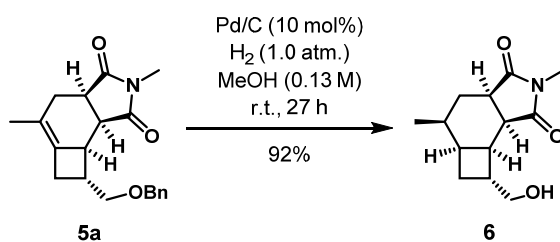

**(3*aR*,5*S*,5*aS*,7*R*,7*aR*,7*bS*)-7-(Hydroxymethyl)-2,5-dimethyloctahydro-1*H*-cyclobuta[*e*]isoindole-1,3(2*H*)-dione (**6**)**

A flame-dried 10 mL Schlenk tube was charged with Pd/C (10%, 27.0 mg, 25.4  $\mu\text{mol}$ ), then evacuated and backfilled with  $\text{H}_2$  from a balloon for three times. A solution of **5a** (82.8 mg, 0.254 mmol) in MeOH (1 mL+1 mL) was added, and the mixture was stirred at room temperature for 27 h. The mixture was filtered through celite, washed with EA, concentrated, and purified by column chromatography on silica gel (PE:EA =2:1) to afford **6** (54.5 mg, 0.230 mmol, 92% yield) as a white solid.

$[\alpha]_{\text{D}}^{24}$  52.76 (c 0.50,  $\text{CHCl}_3$ ).

$^1\text{H}$  NMR (400 MHz,  $\text{CDCl}_3$ )  $\delta$  (ppm): 3.49 (qd,  $J = 11.2, 6.2$  Hz, 2H), 3.05-2.96 (m, 1H), 2.99 (s, 3H), 2.94-2.87 (m, 1H), 2.54-2.43 (m, 1H), 2.08-1.99 (m, 1H), 1.90-1.78 (m, 2H), 1.77-1.55 (m, 5H), 0.90 (d,  $J = 6.7$  Hz, 3H).

$^{13}\text{C}$  NMR (101 MHz,  $\text{CDCl}_3$ )  $\delta$  (ppm): 181.21, 180.29, 67.59, 39.69, 39.66, 38.72, 37.24, 32.59, 29.49, 26.56, 24.67, 19.46, 17.06.

IR (neat,  $\text{cm}^{-1}$ ): 3472, 2957, 2929, 2901, 2869, 1800, 1763, 1674, 1438, 1384, 1325, 1313, 1284, 1213, 1169, 1132, 1091, 1074, 1051, 1032.

HRMS-ESI ( $m/z$ ):  $[\text{M}+\text{H}]^+$  calcd. for  $\text{C}_{13}\text{H}_{20}\text{NO}_3$ , 238.1438; found, 238.1438.



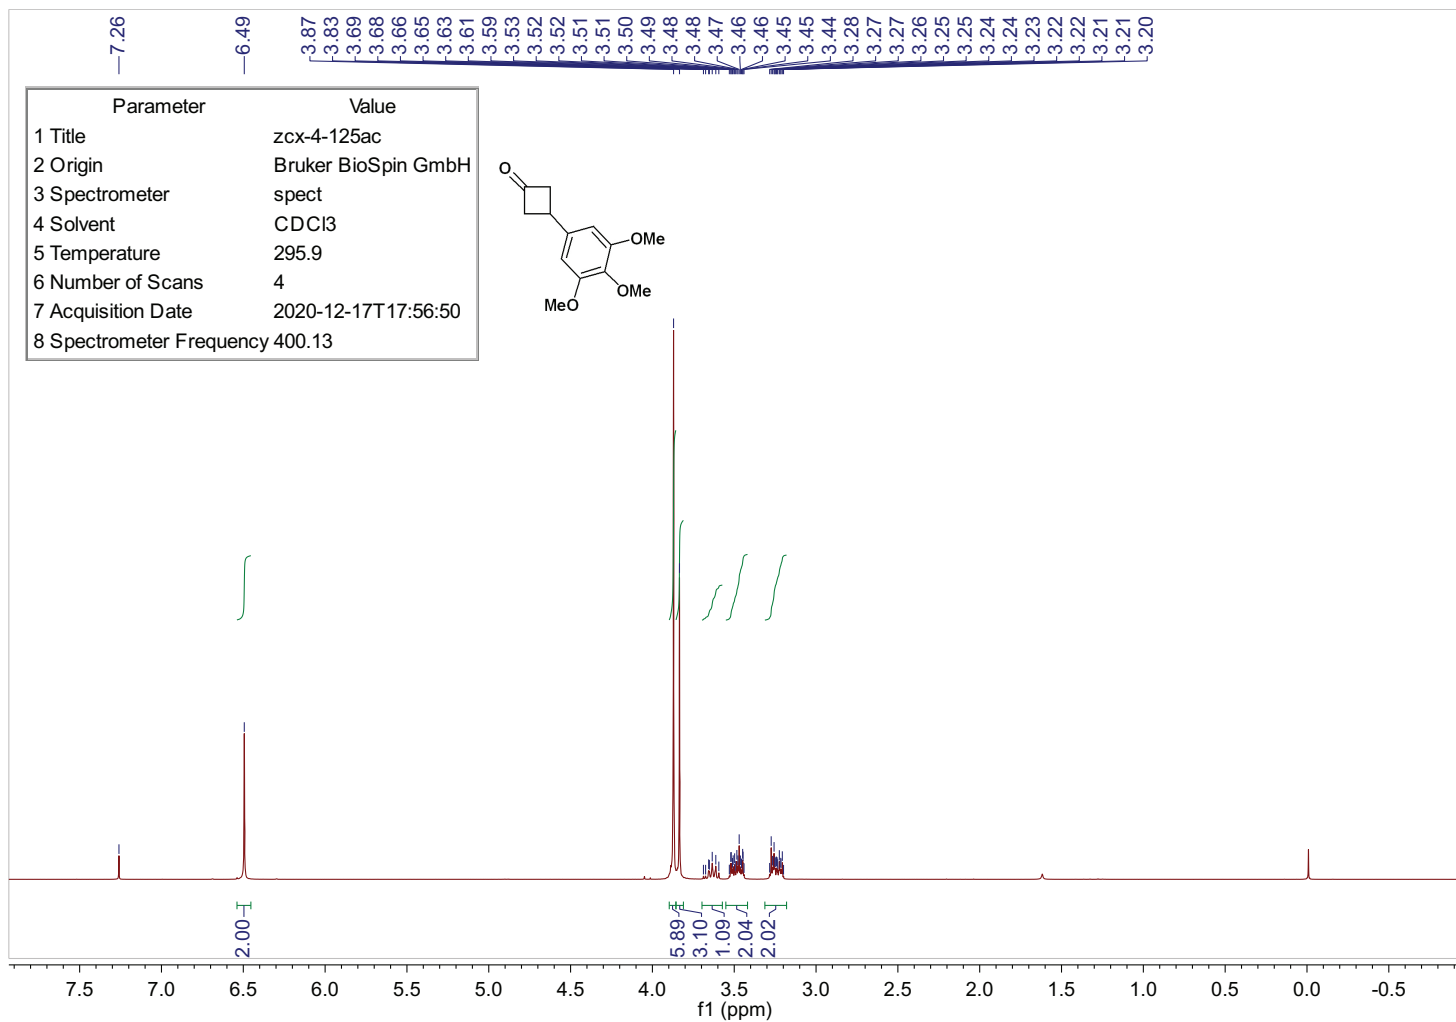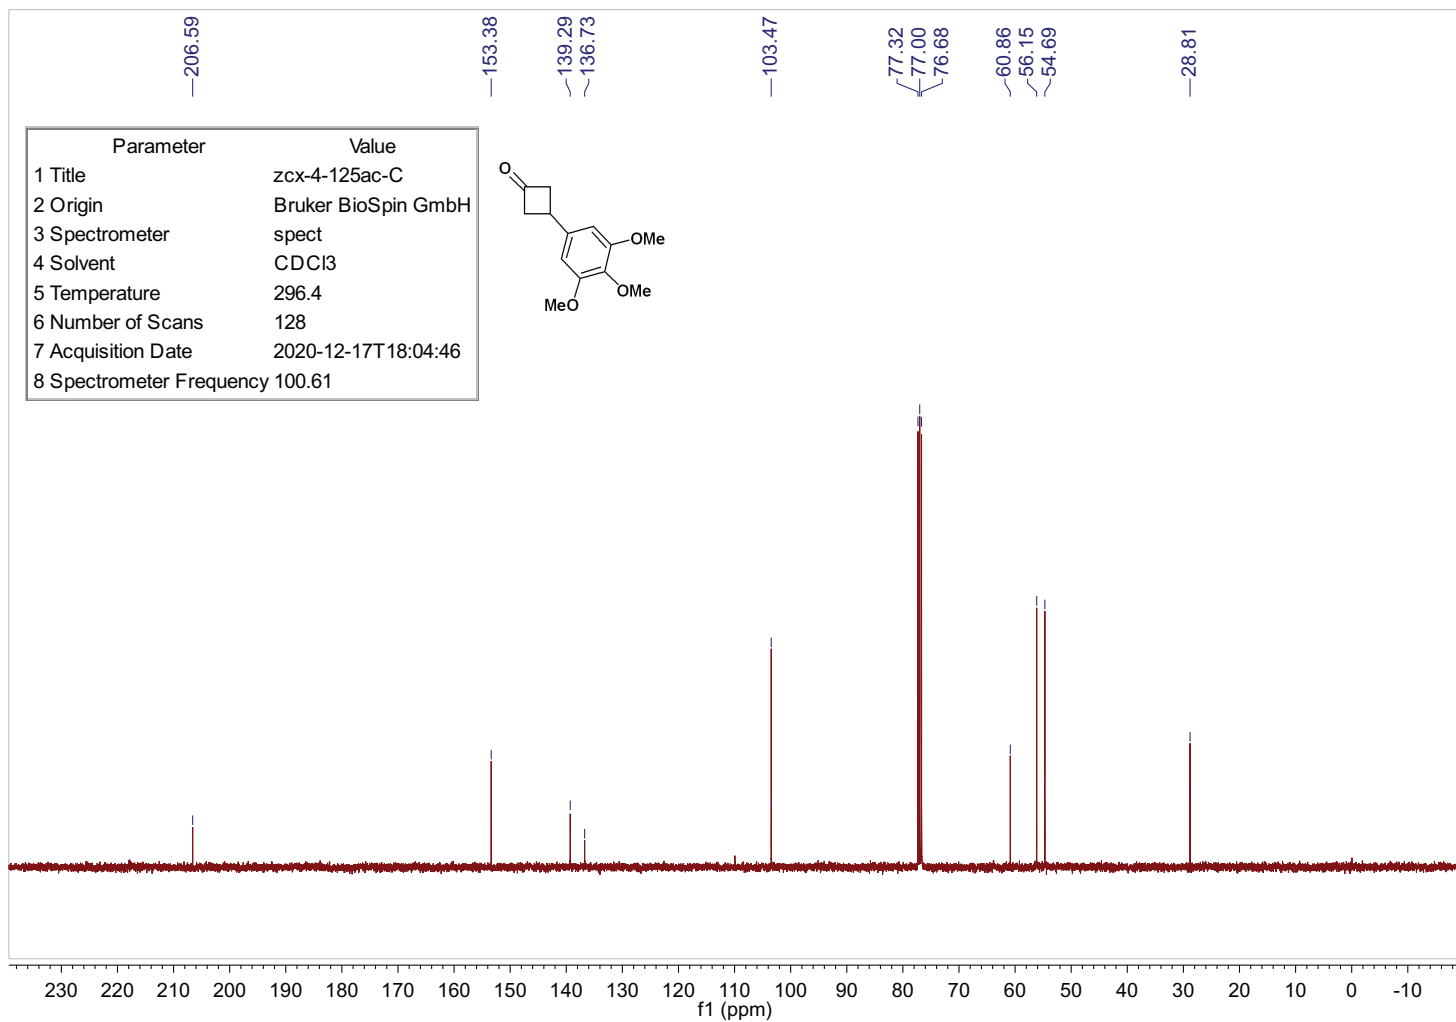

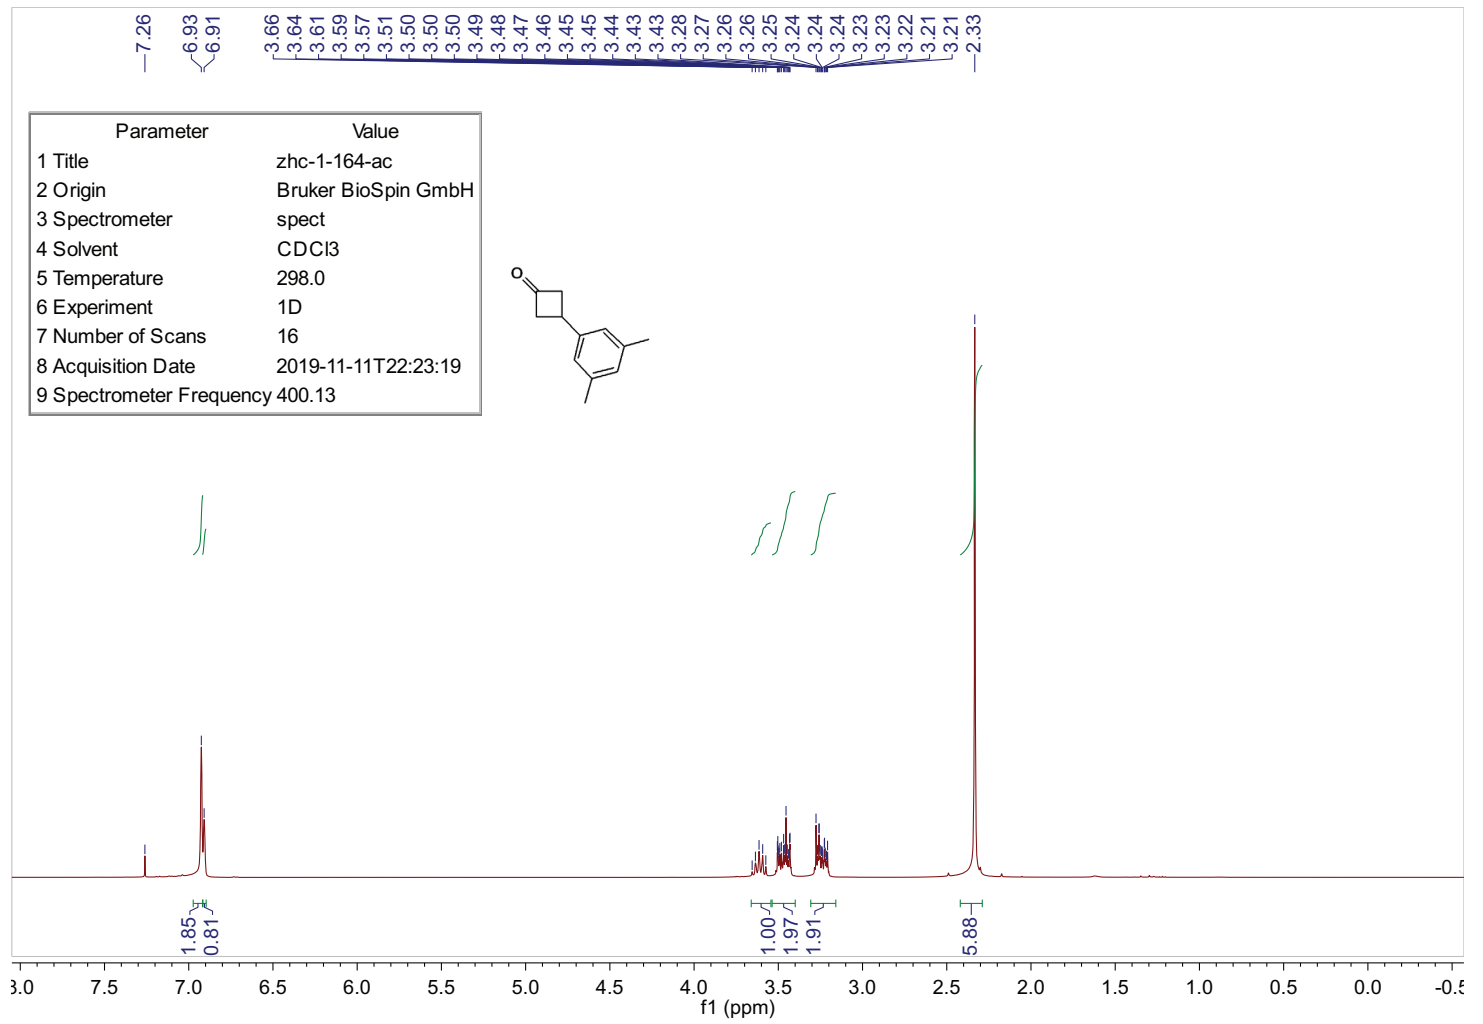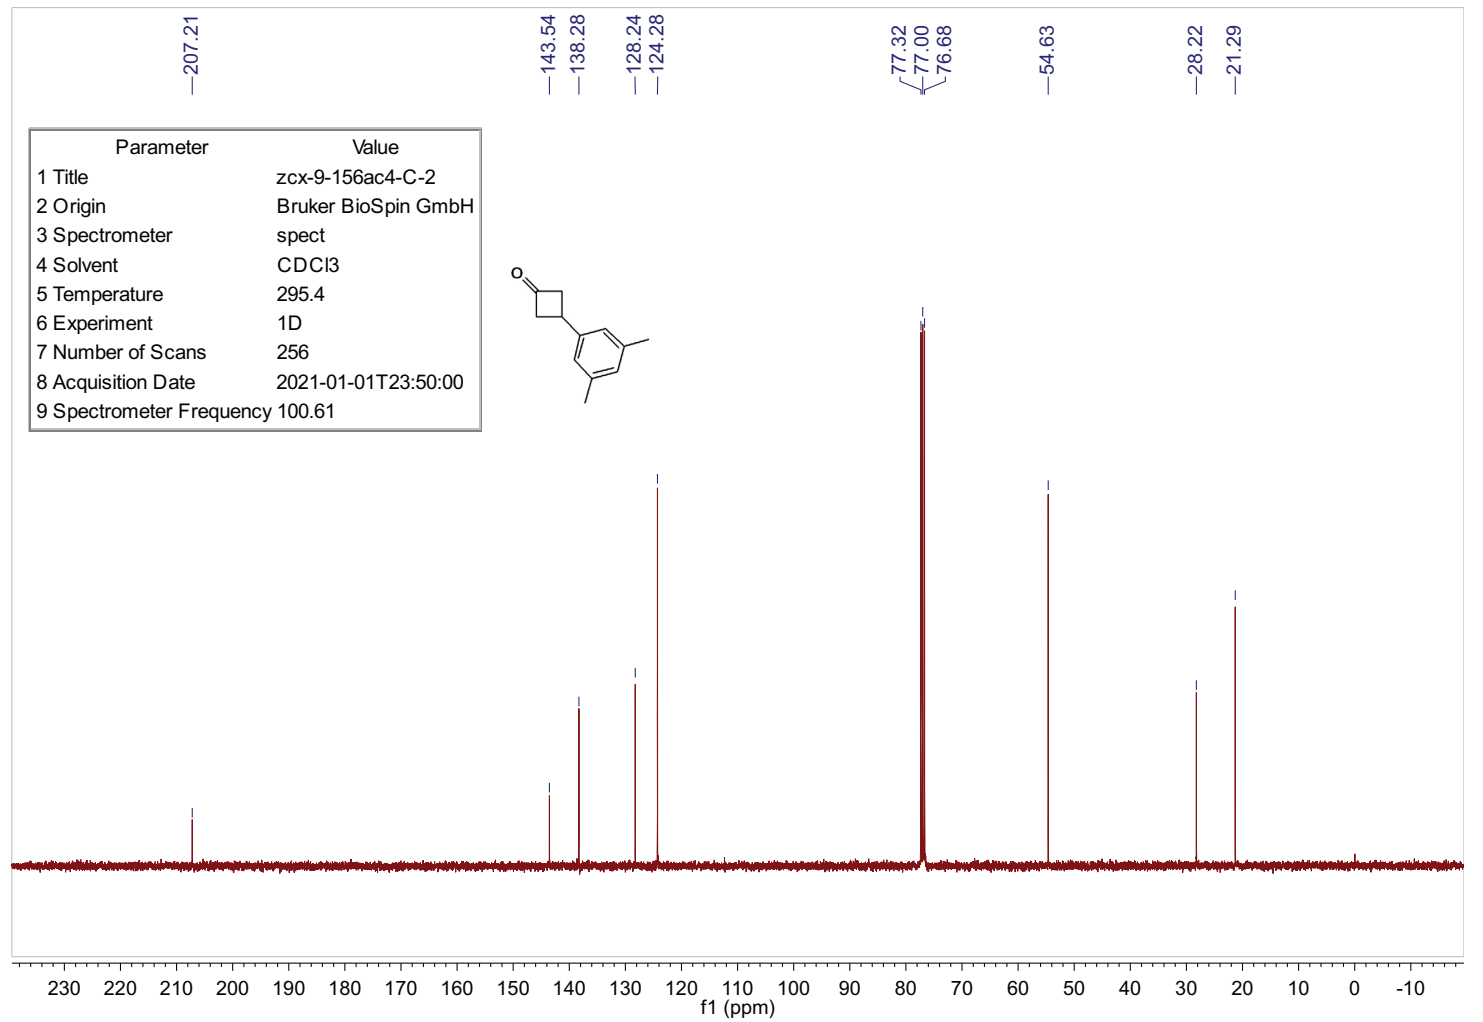

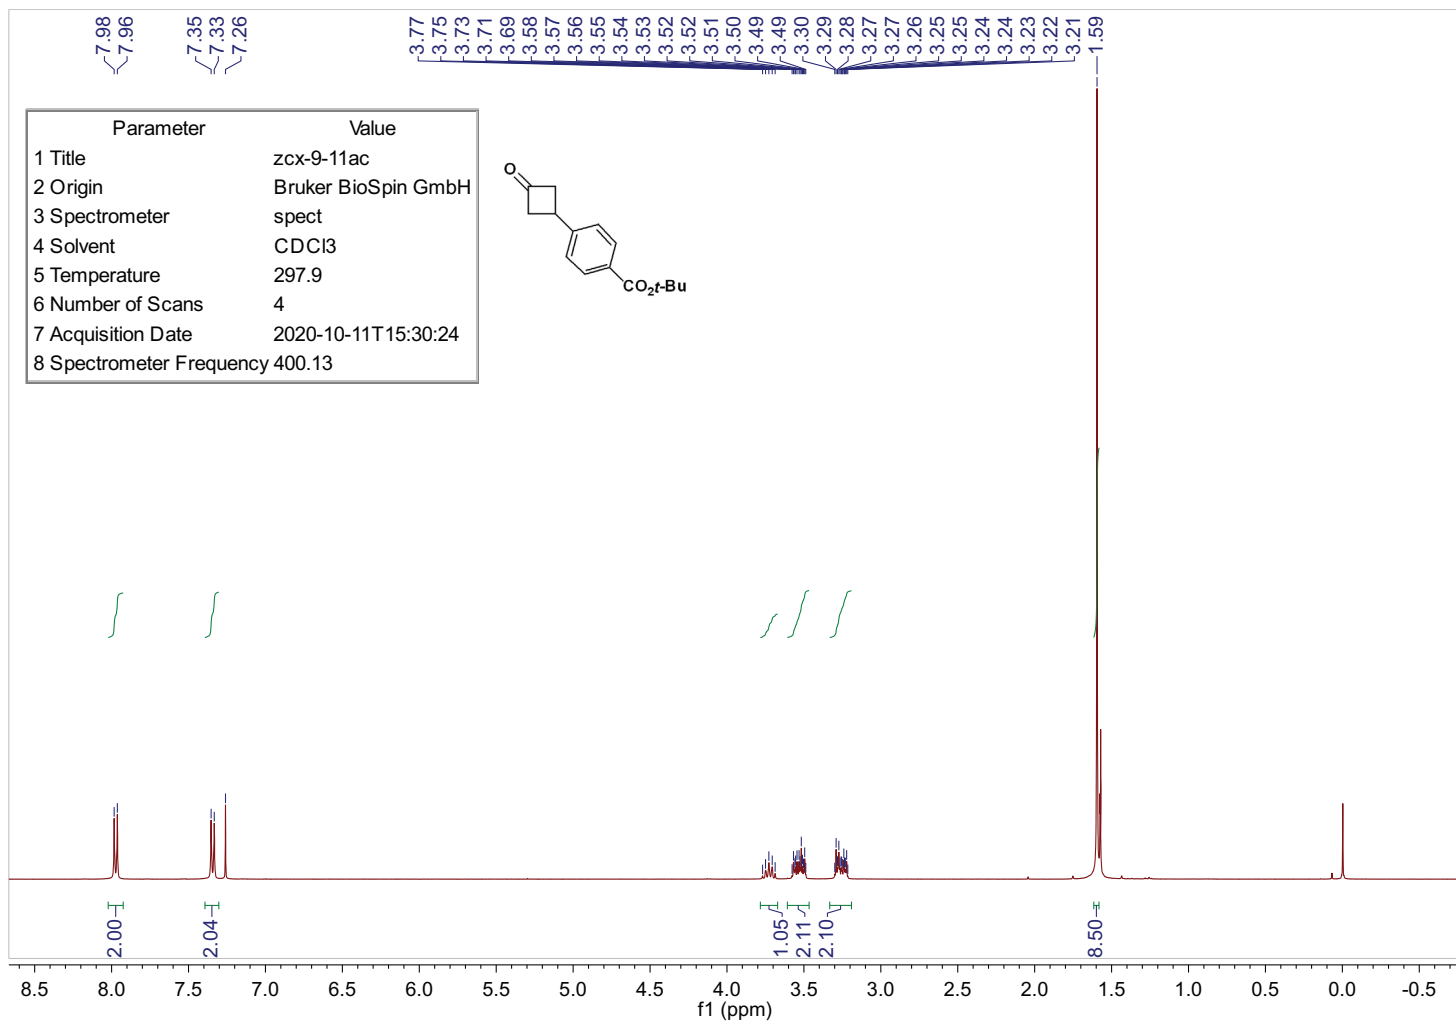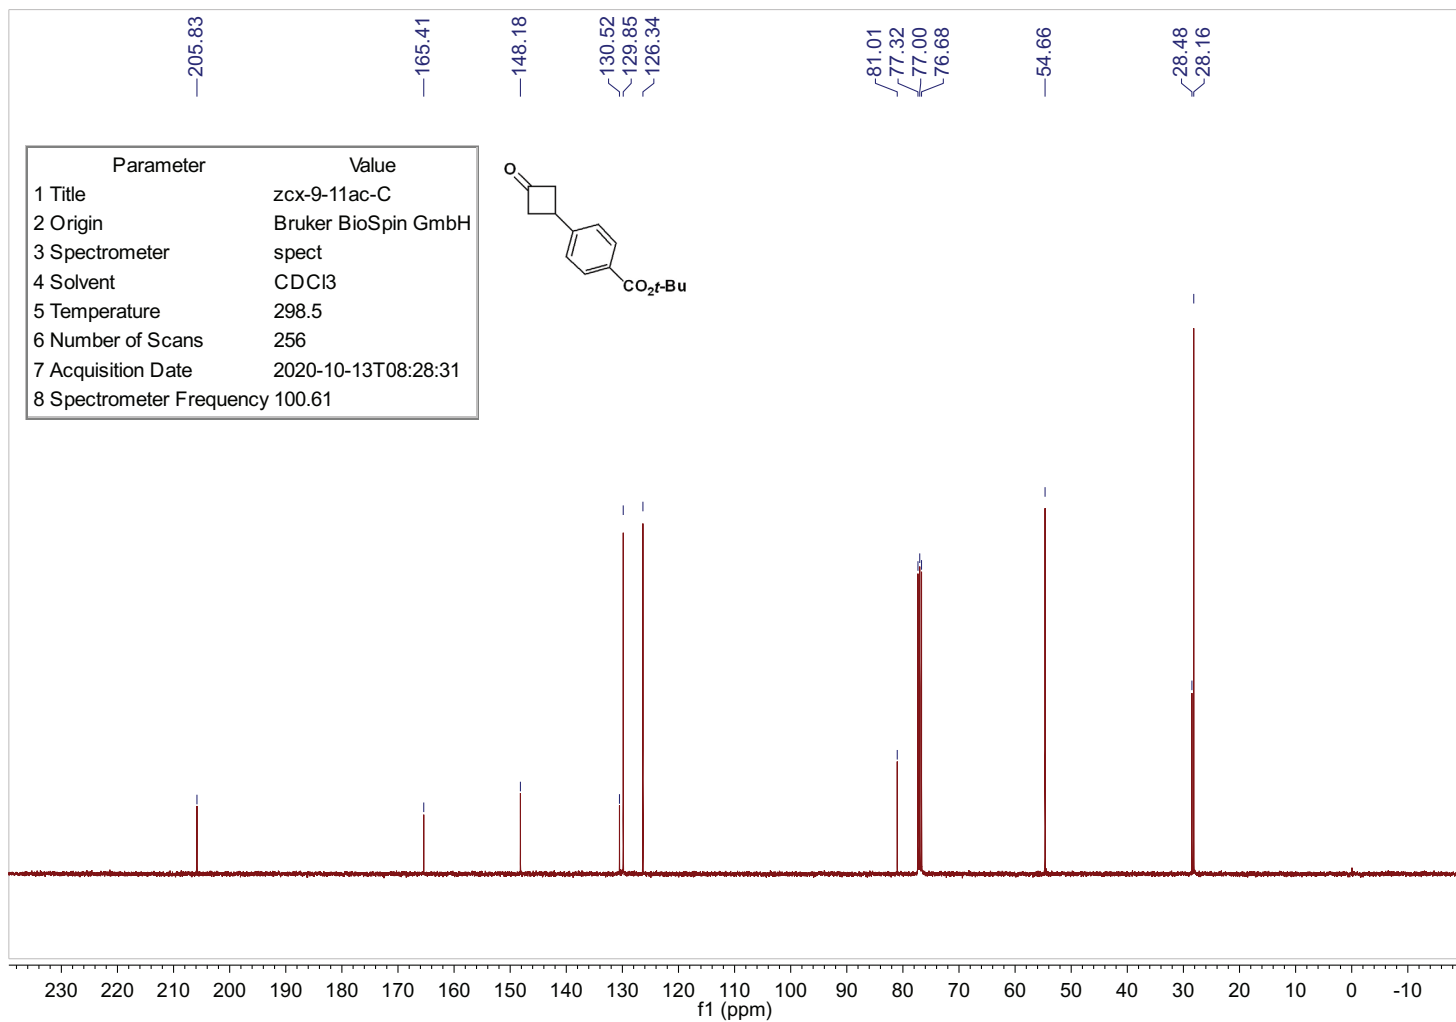

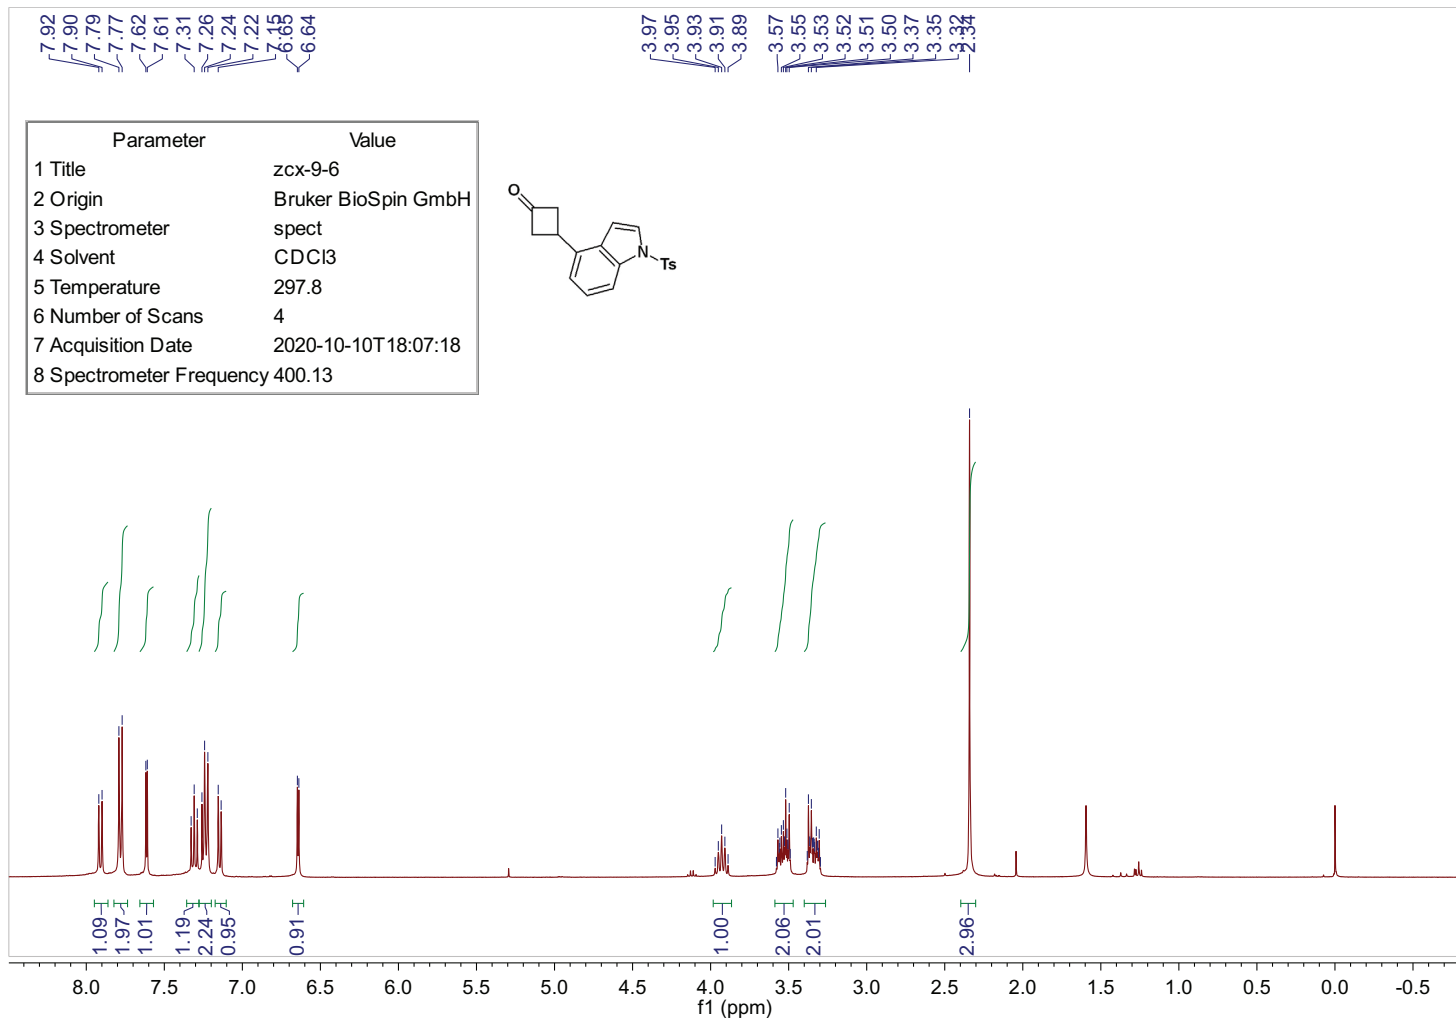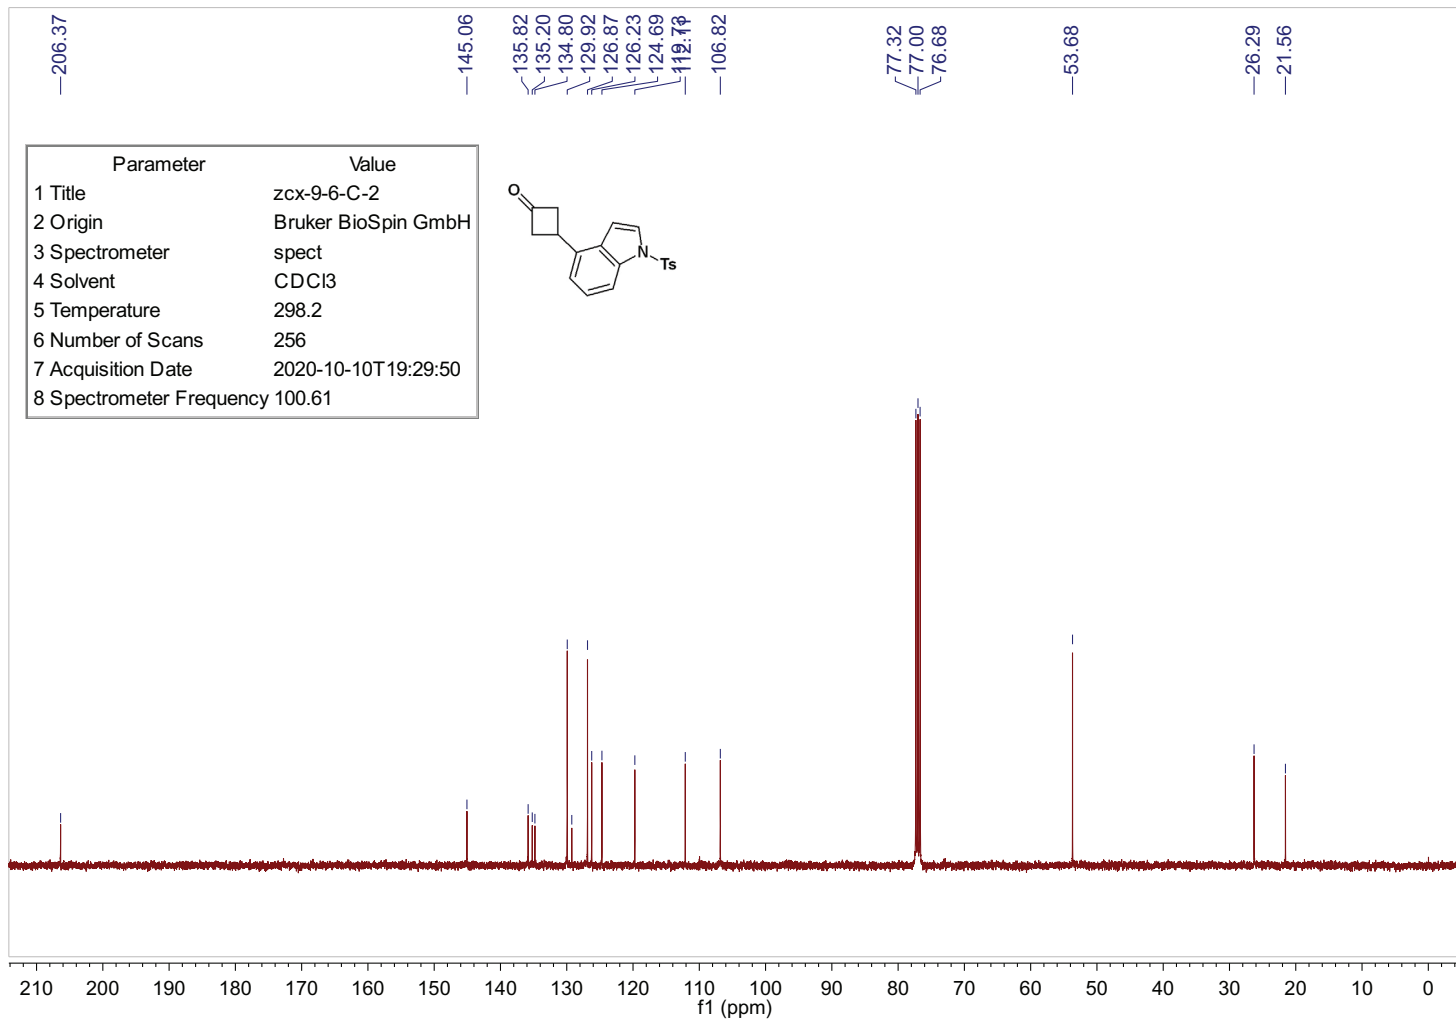

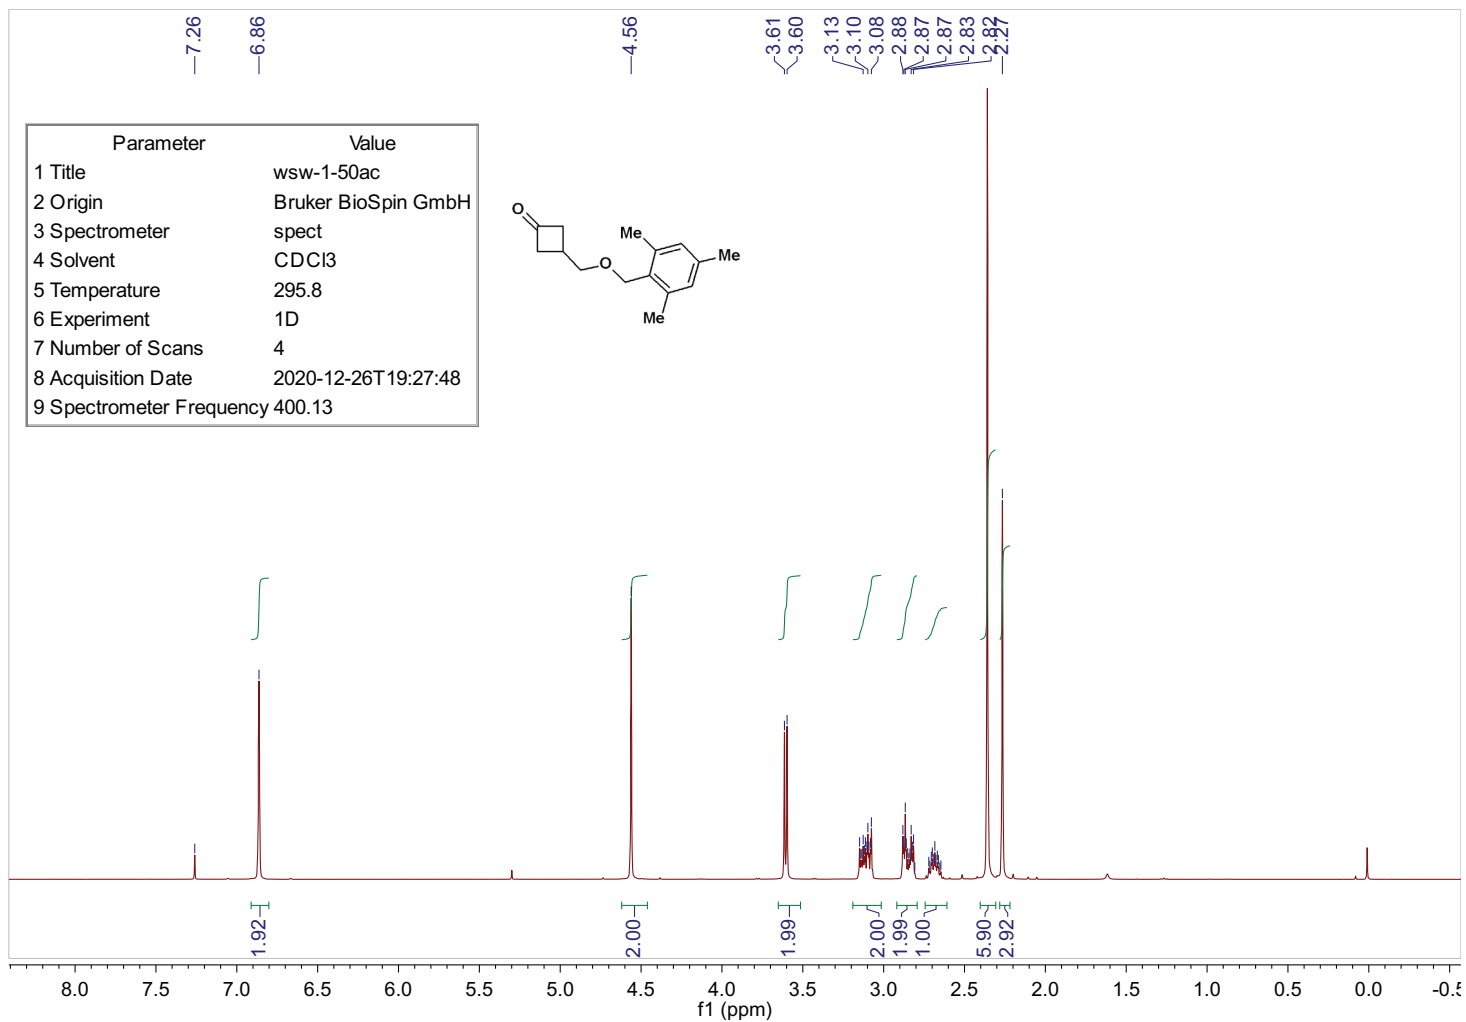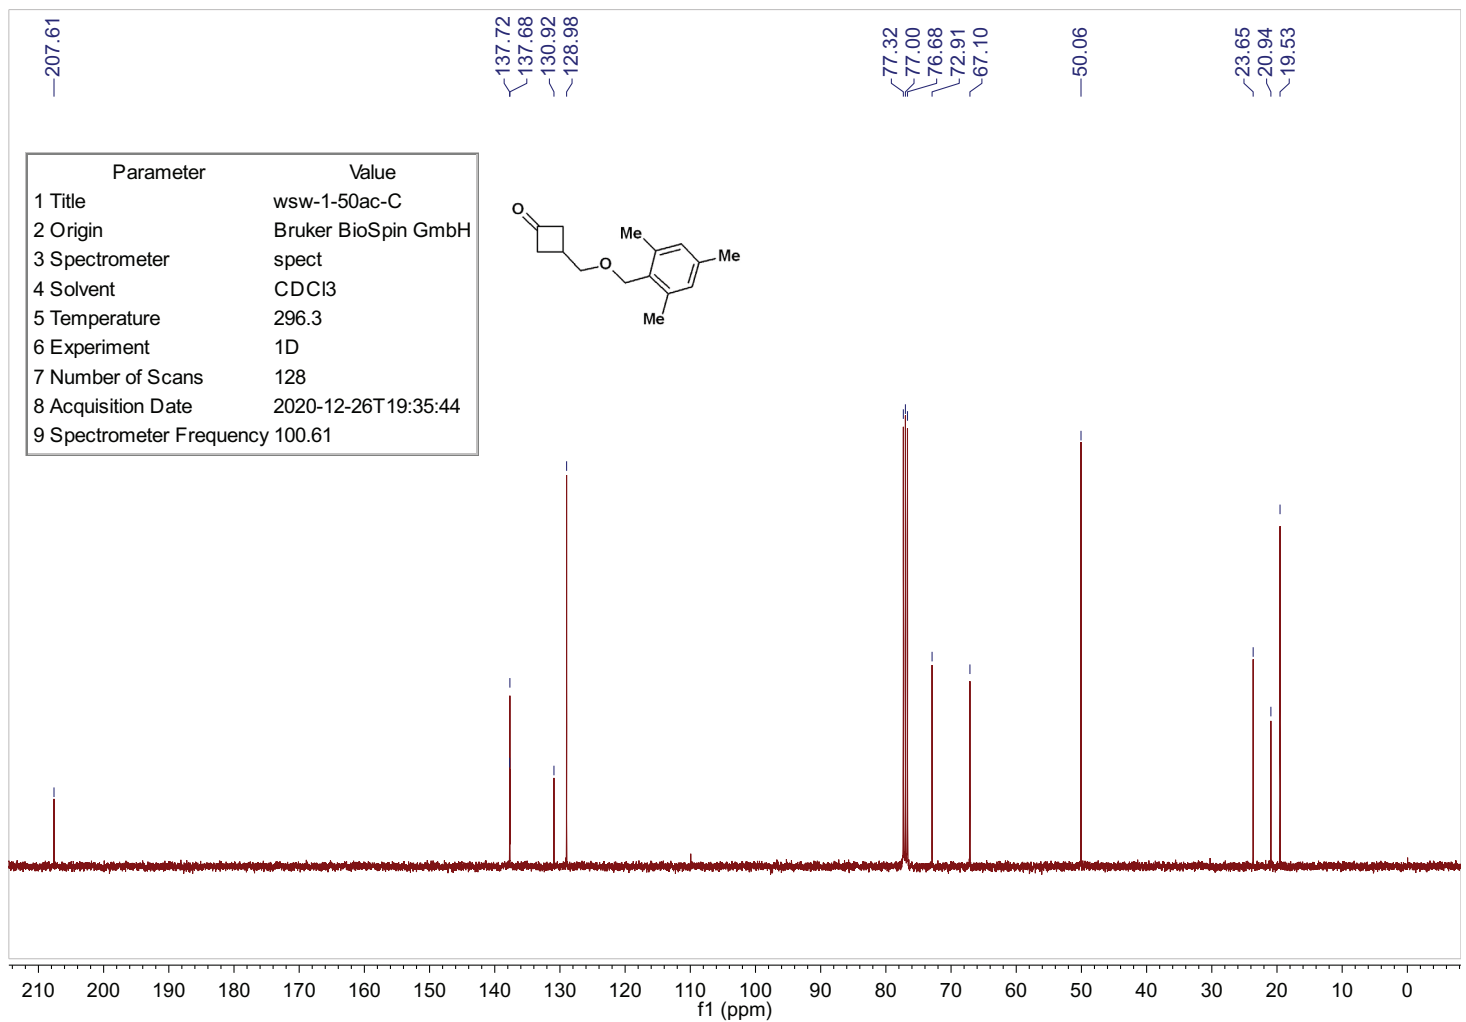

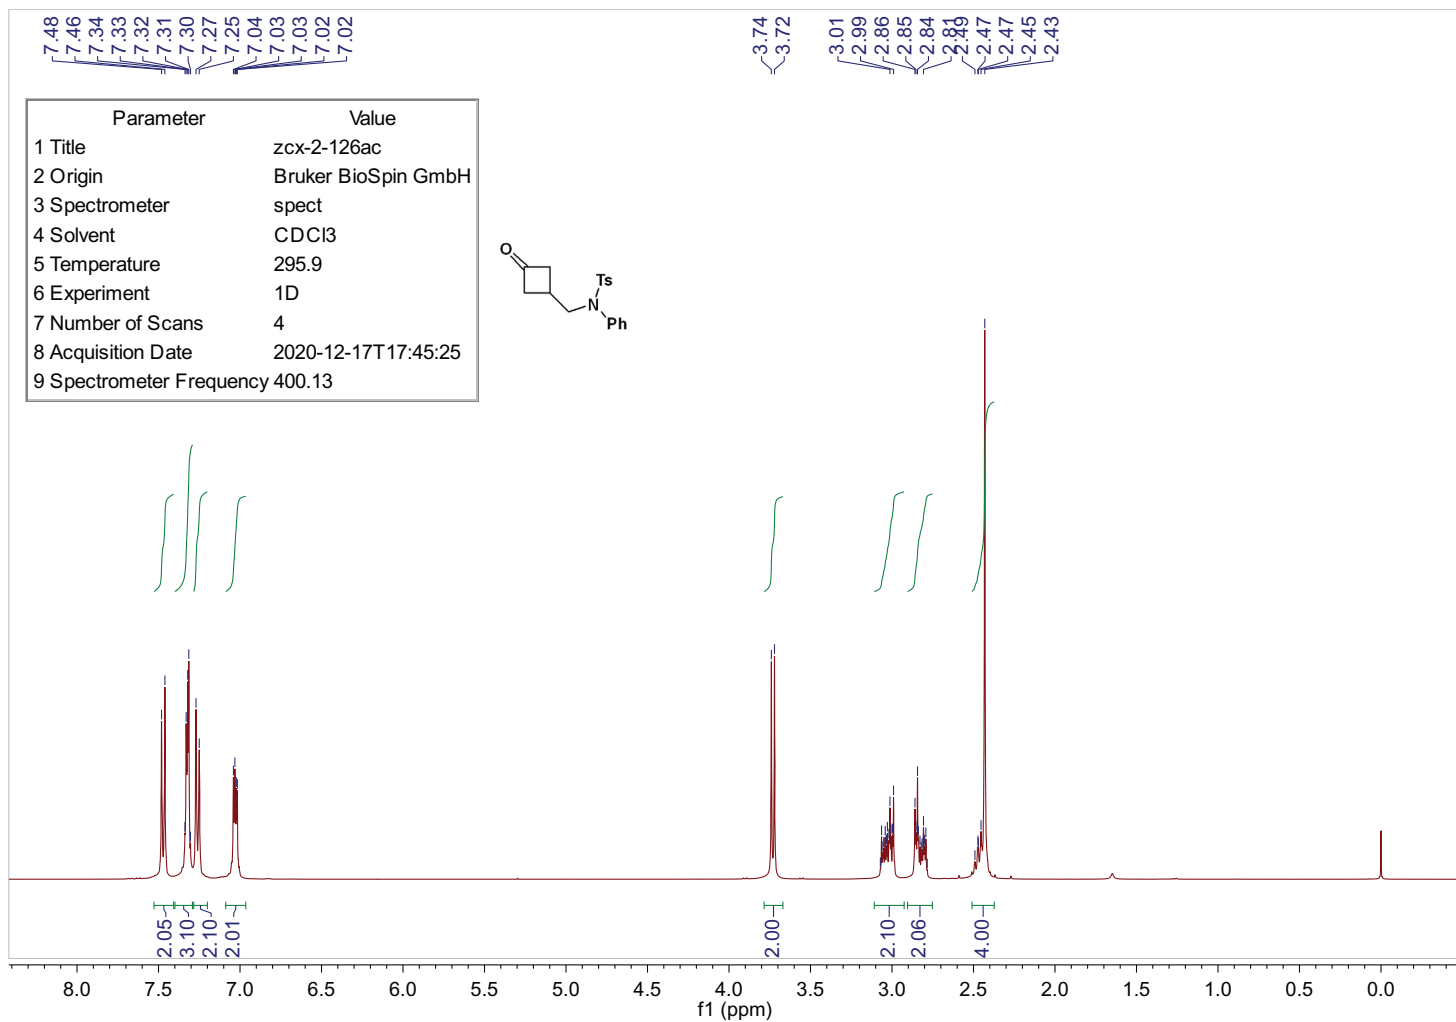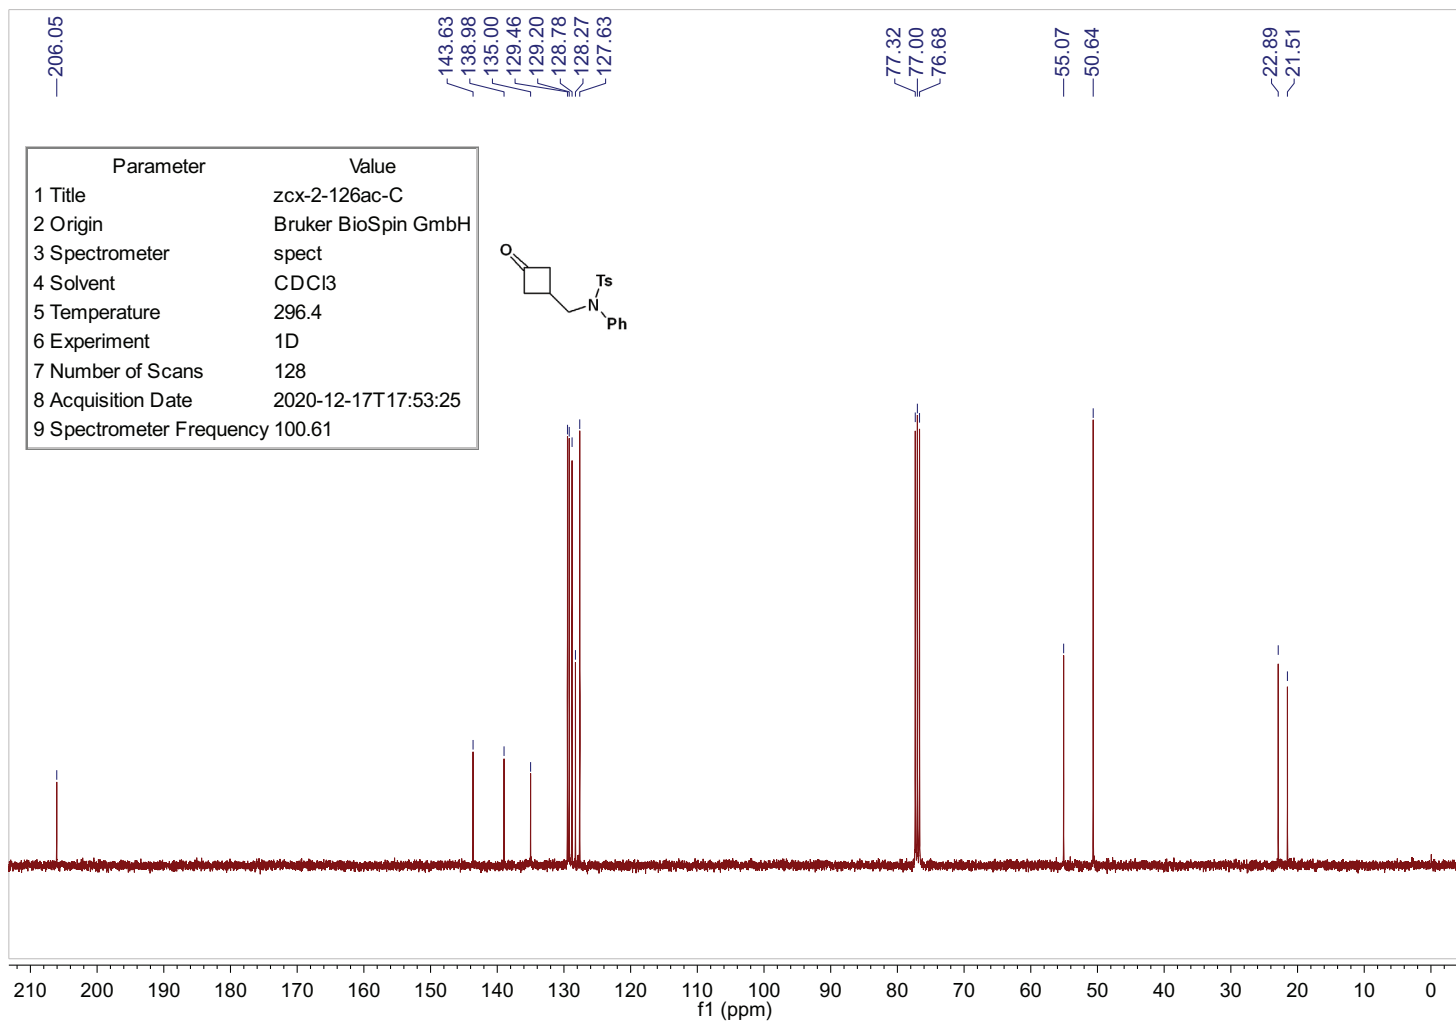

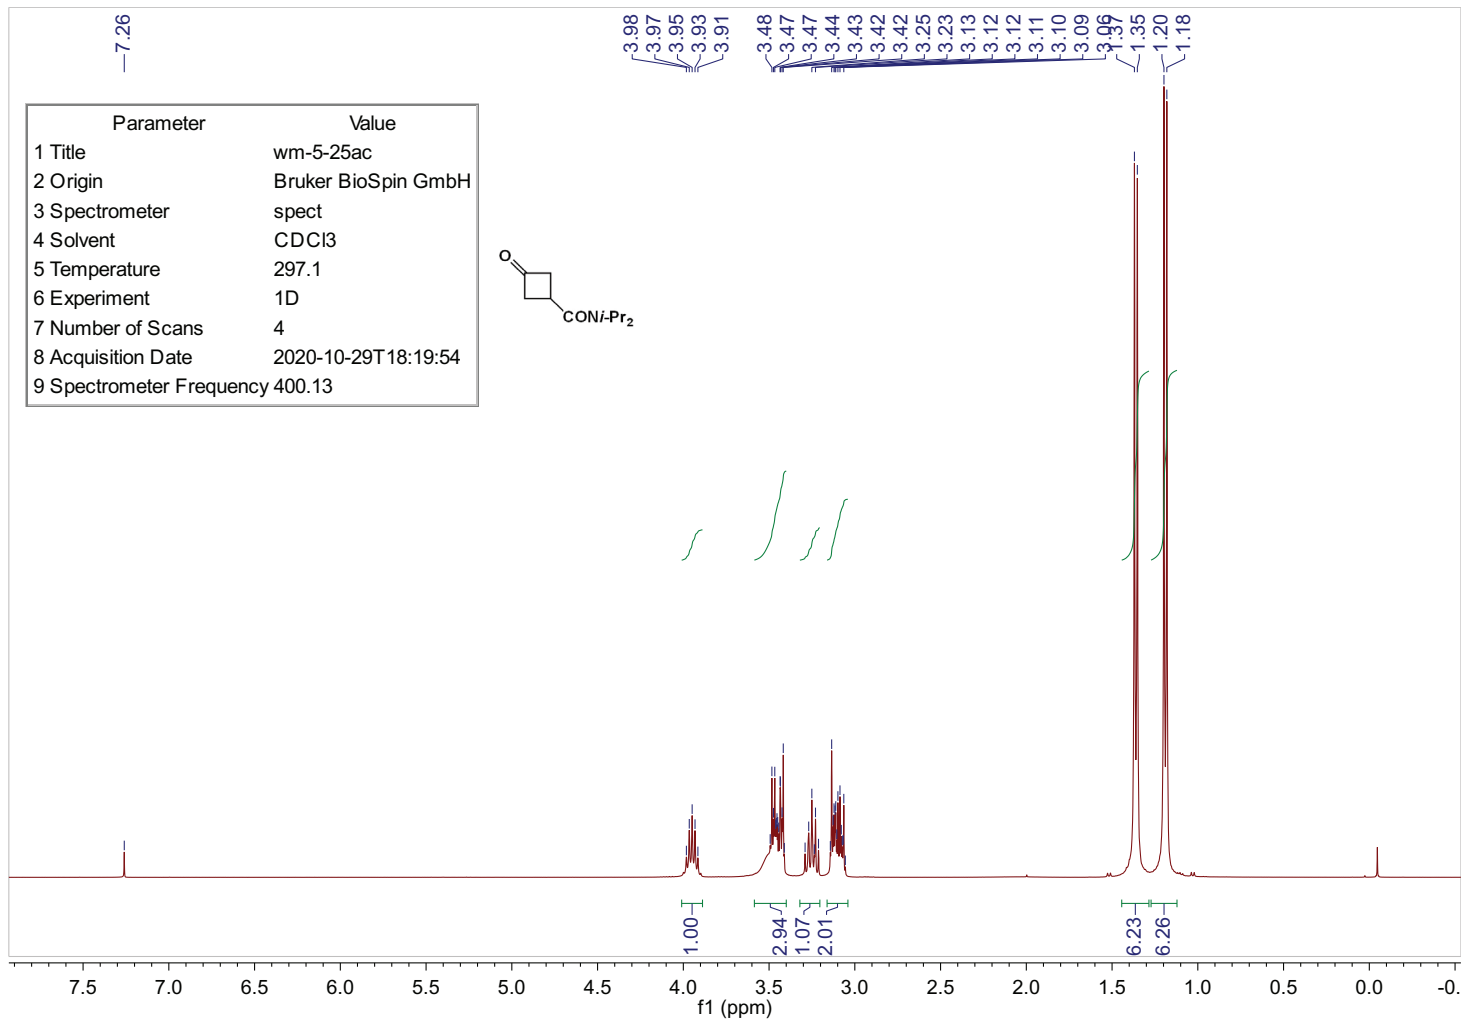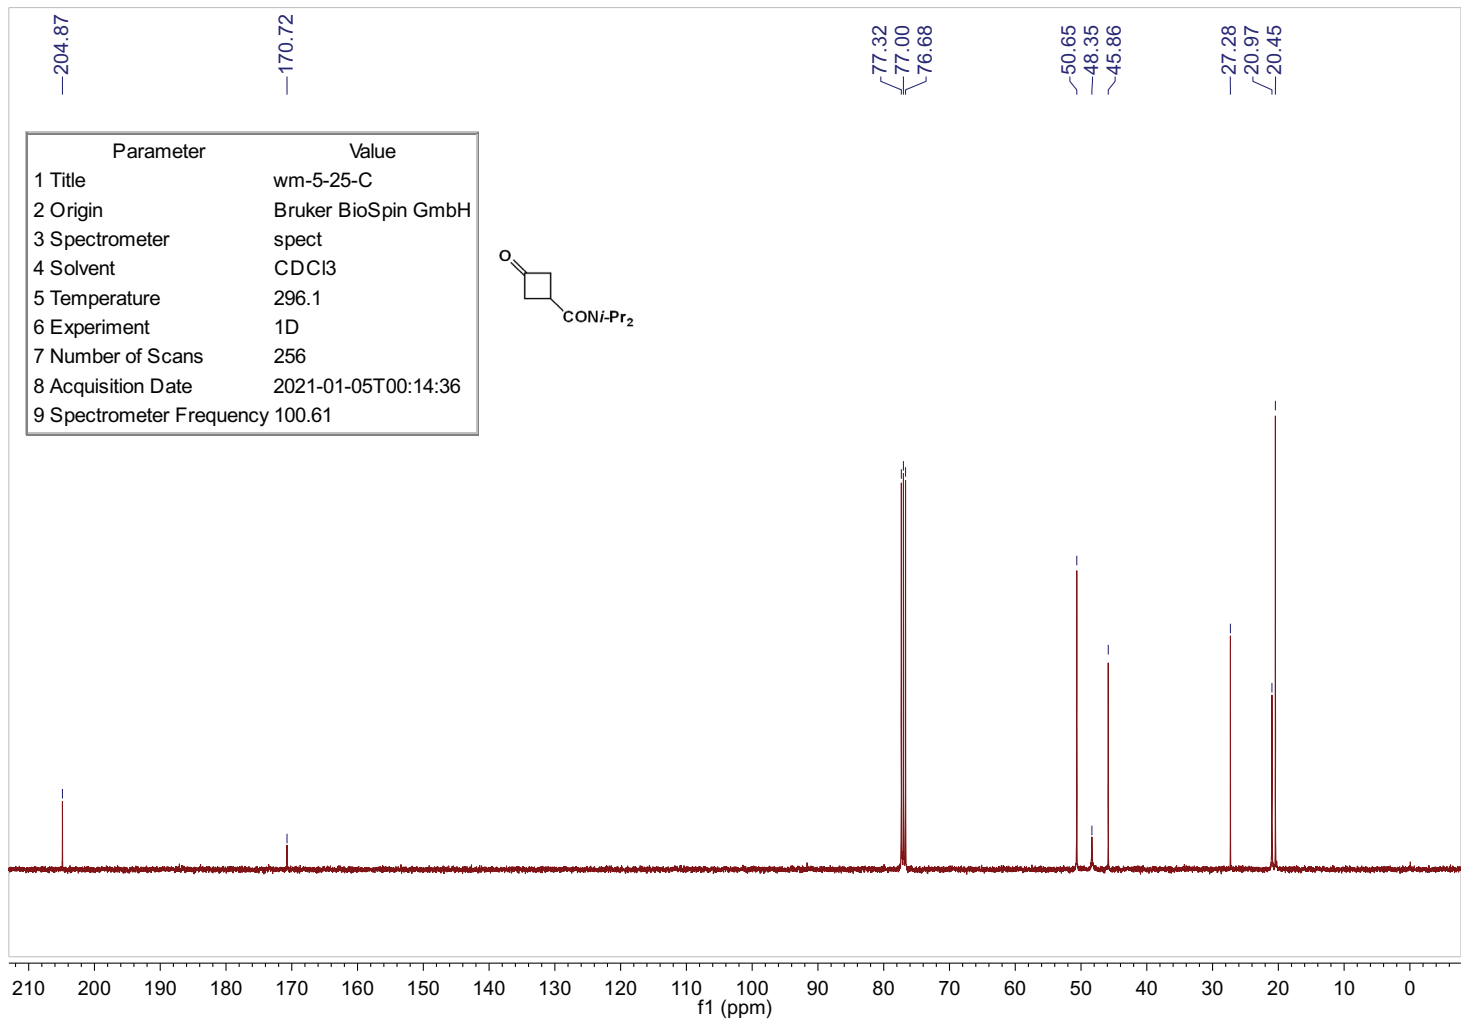

-7.26

3.74  
3.73  
3.71  
3.69  
3.68  
3.60  
3.59  
3.58  
3.56  
3.55  
3.33  
3.32  
3.30  
3.28  
3.27  
2.78  
2.77  
2.76  
2.74  
2.74  
2.73

1.48  
1.38  
1.36  
1.18  
1.16

| Parameter                | Value               |
|--------------------------|---------------------|
| 1 Title                  | wm-5-33ac-1         |
| 2 Origin                 | Bruker BioSpin GmbH |
| 3 Solvent                | CDCl3               |
| 4 Temperature            | 298.2               |
| 5 Number of Scans        | 4                   |
| 6 Relaxation Delay       | 5.0000              |
| 7 Acquisition Date       | 2018-10-11T17:19:02 |
| 8 Spectrometer Frequency | 400.13              |

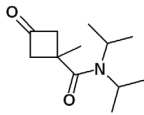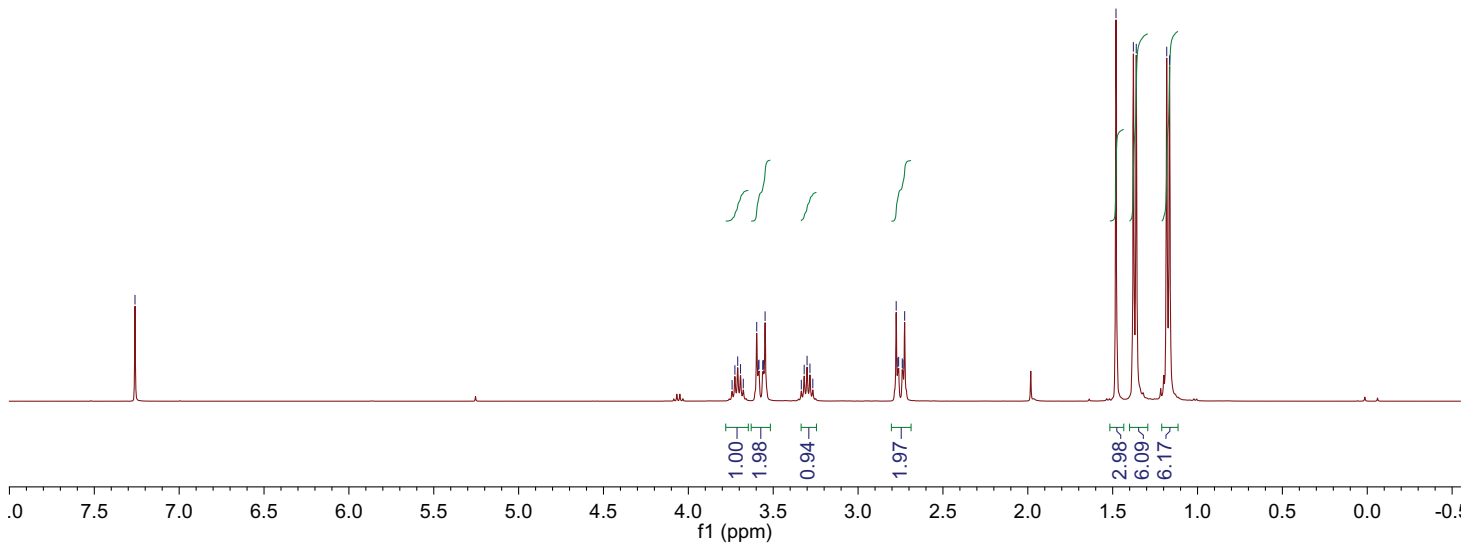

-206.27

-173.23

77.32  
77.00  
76.68

-57.10

-49.12

-46.33

-35.79

-24.58

-20.57

-20.40

| Parameter                | Value               |
|--------------------------|---------------------|
| 1 Title                  | wm-5-33             |
| 2 Origin                 | Bruker BioSpin GmbH |
| 3 Spectrometer           | spect               |
| 4 Solvent                | CDCl3               |
| 5 Temperature            | 296.3               |
| 6 Experiment             | 1D                  |
| 7 Number of Scans        | 128                 |
| 8 Acquisition Date       | 2020-12-27T02:28:46 |
| 9 Spectrometer Frequency | 100.61              |

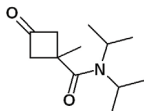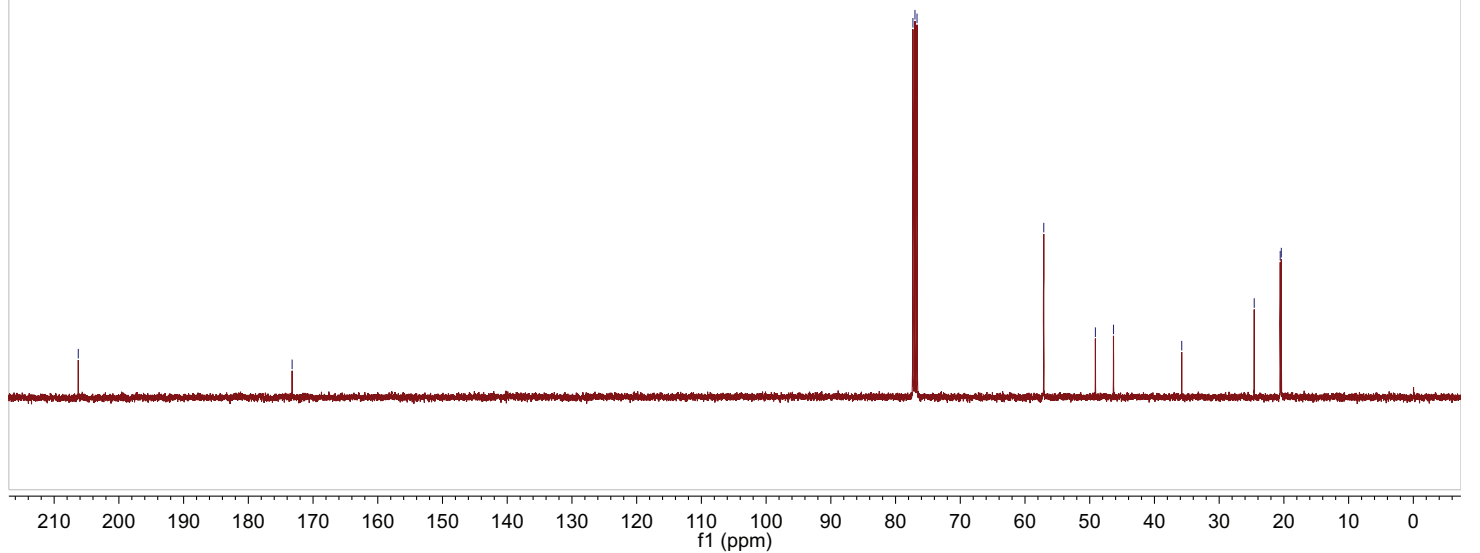



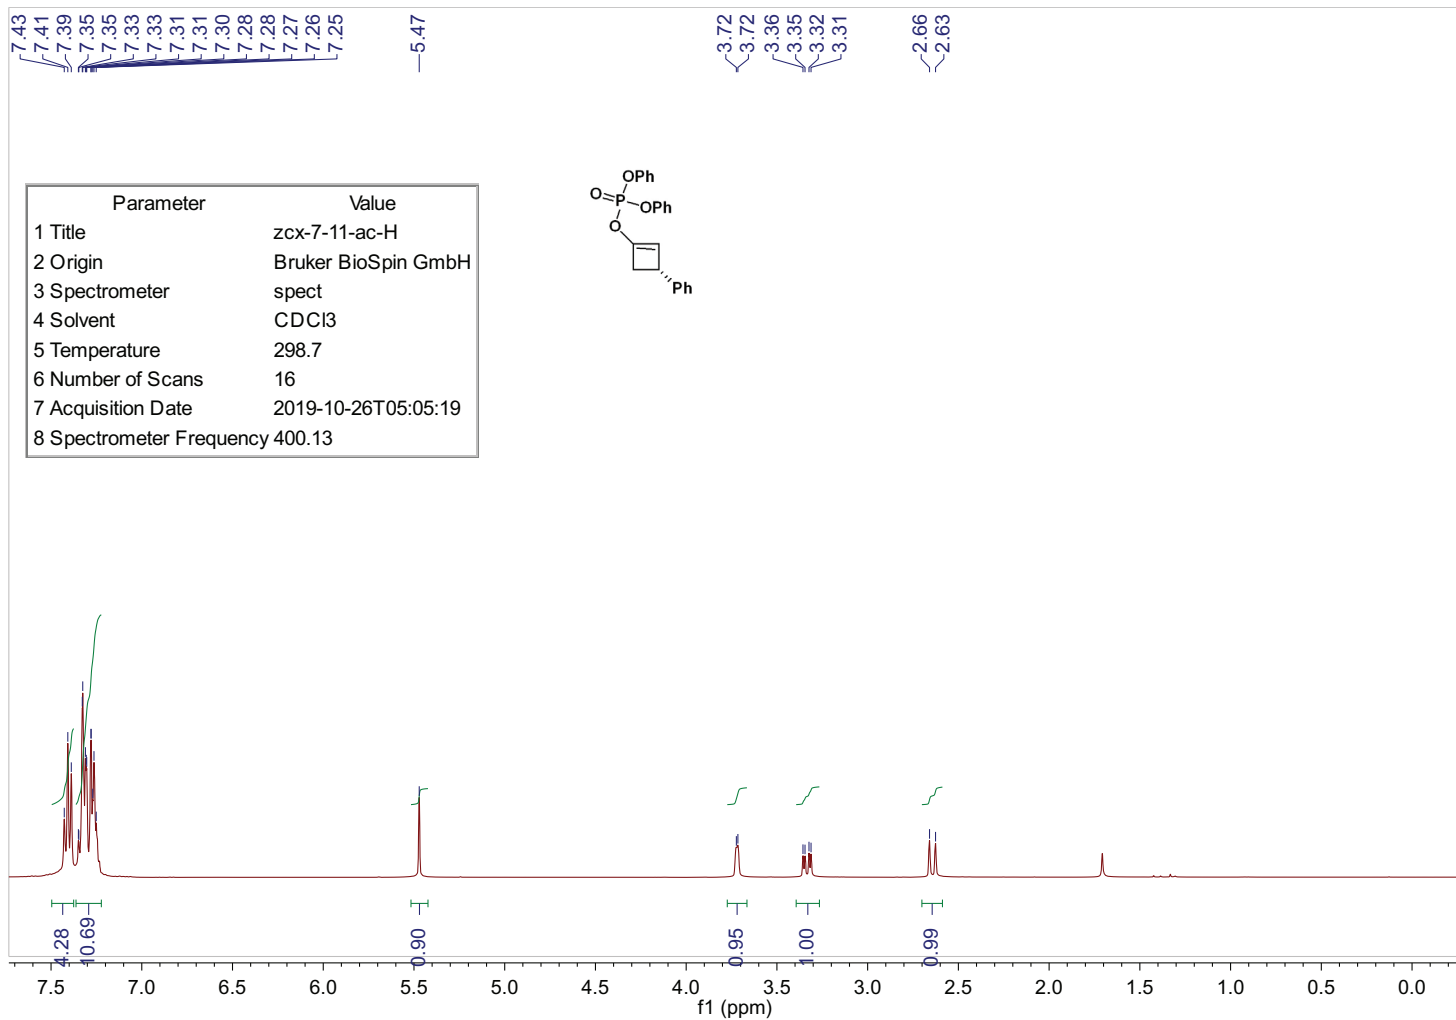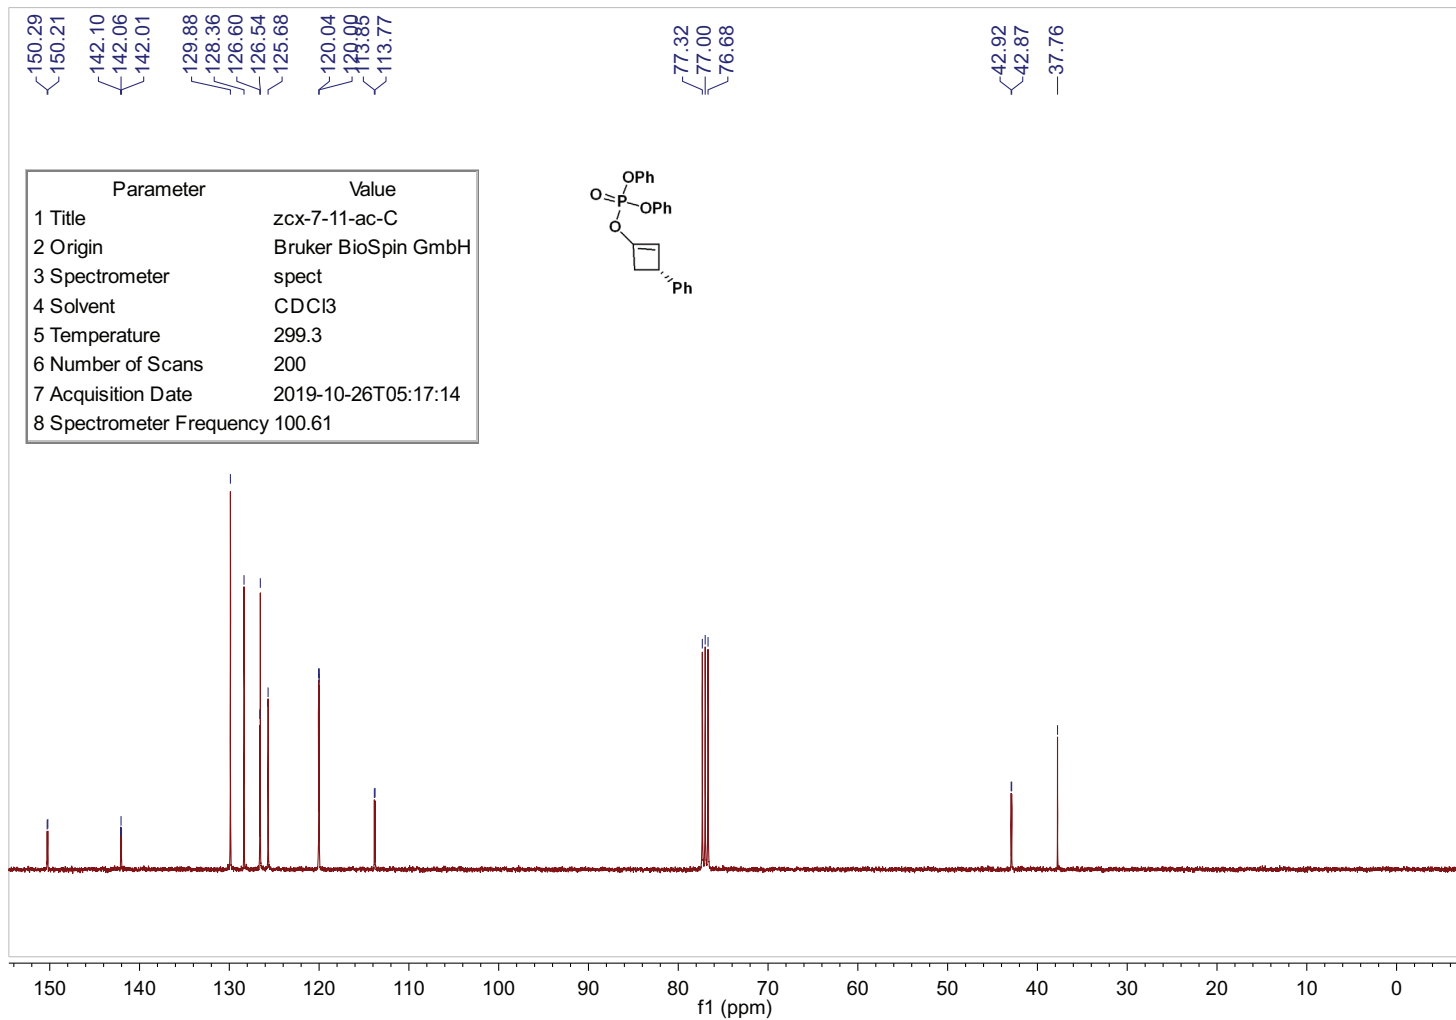

| Parameter                | Value               |
|--------------------------|---------------------|
| 1 Title                  | zcx-7-11-ac-P       |
| 2 Origin                 | Bruker BioSpin GmbH |
| 3 Spectrometer           | spect               |
| 4 Solvent                | CDCl3               |
| 5 Temperature            | 299.2               |
| 6 Number of Scans        | 16                  |
| 7 Acquisition Date       | 2019-10-26T05:19:07 |
| 8 Spectrometer Frequency | 161.98              |

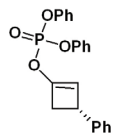

---18.16

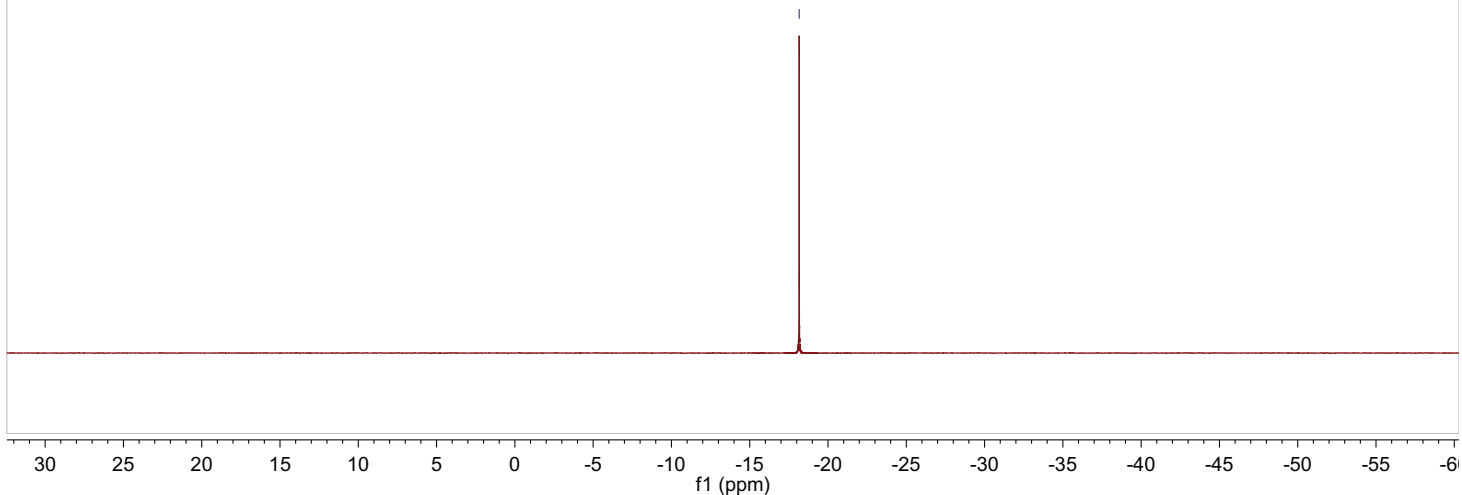

7.38  
7.36  
7.34  
7.28  
7.26  
7.24  
7.22  
7.20  
7.13  
7.11  
7.10  
7.08

---5.40

3.65  
3.64  
3.29  
3.28  
3.26  
3.26  
3.25  
2.55  
2.32

| Parameter                | Value               |
|--------------------------|---------------------|
| 1 Title                  | wsw-1-8             |
| 2 Origin                 | Bruker BioSpin GmbH |
| 3 Spectrometer           | spect               |
| 4 Solvent                | CDCl3               |
| 5 Temperature            | 294.2               |
| 6 Experiment             | 1D                  |
| 7 Number of Scans        | 4                   |
| 8 Acquisition Date       | 2020-12-31T07:51:01 |
| 9 Spectrometer Frequency | 400.13              |

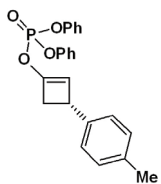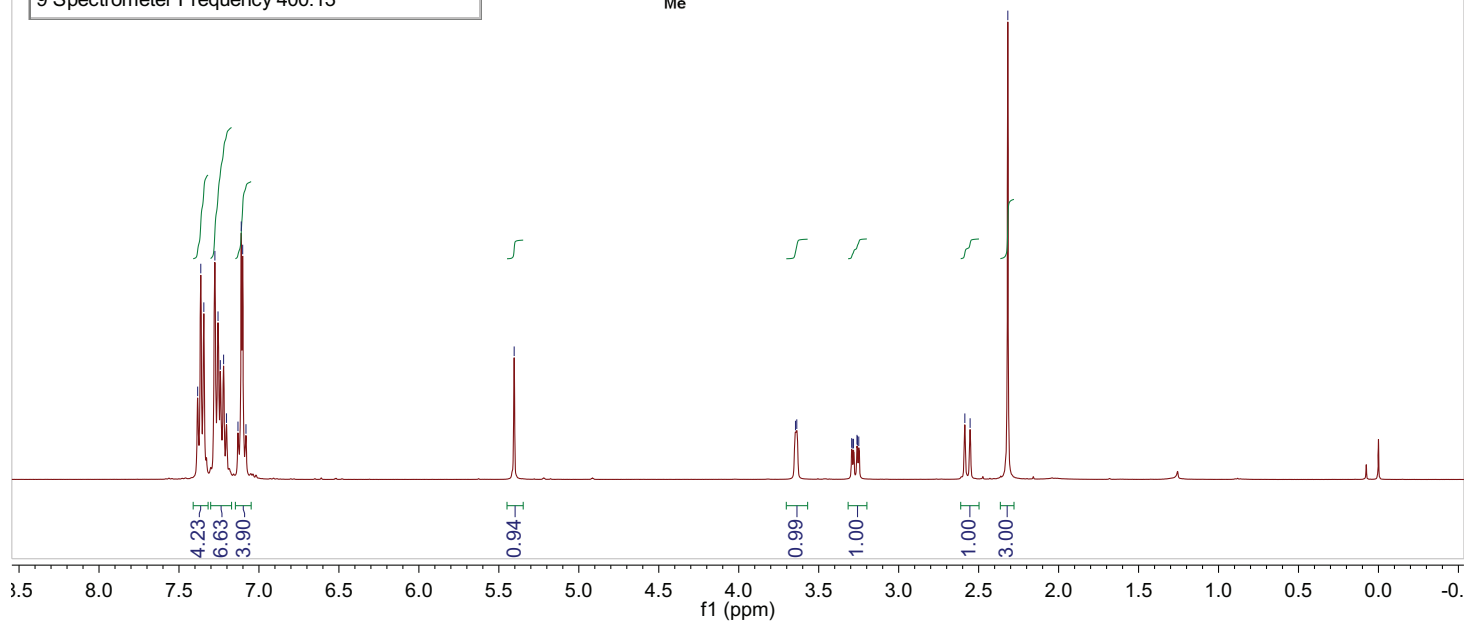

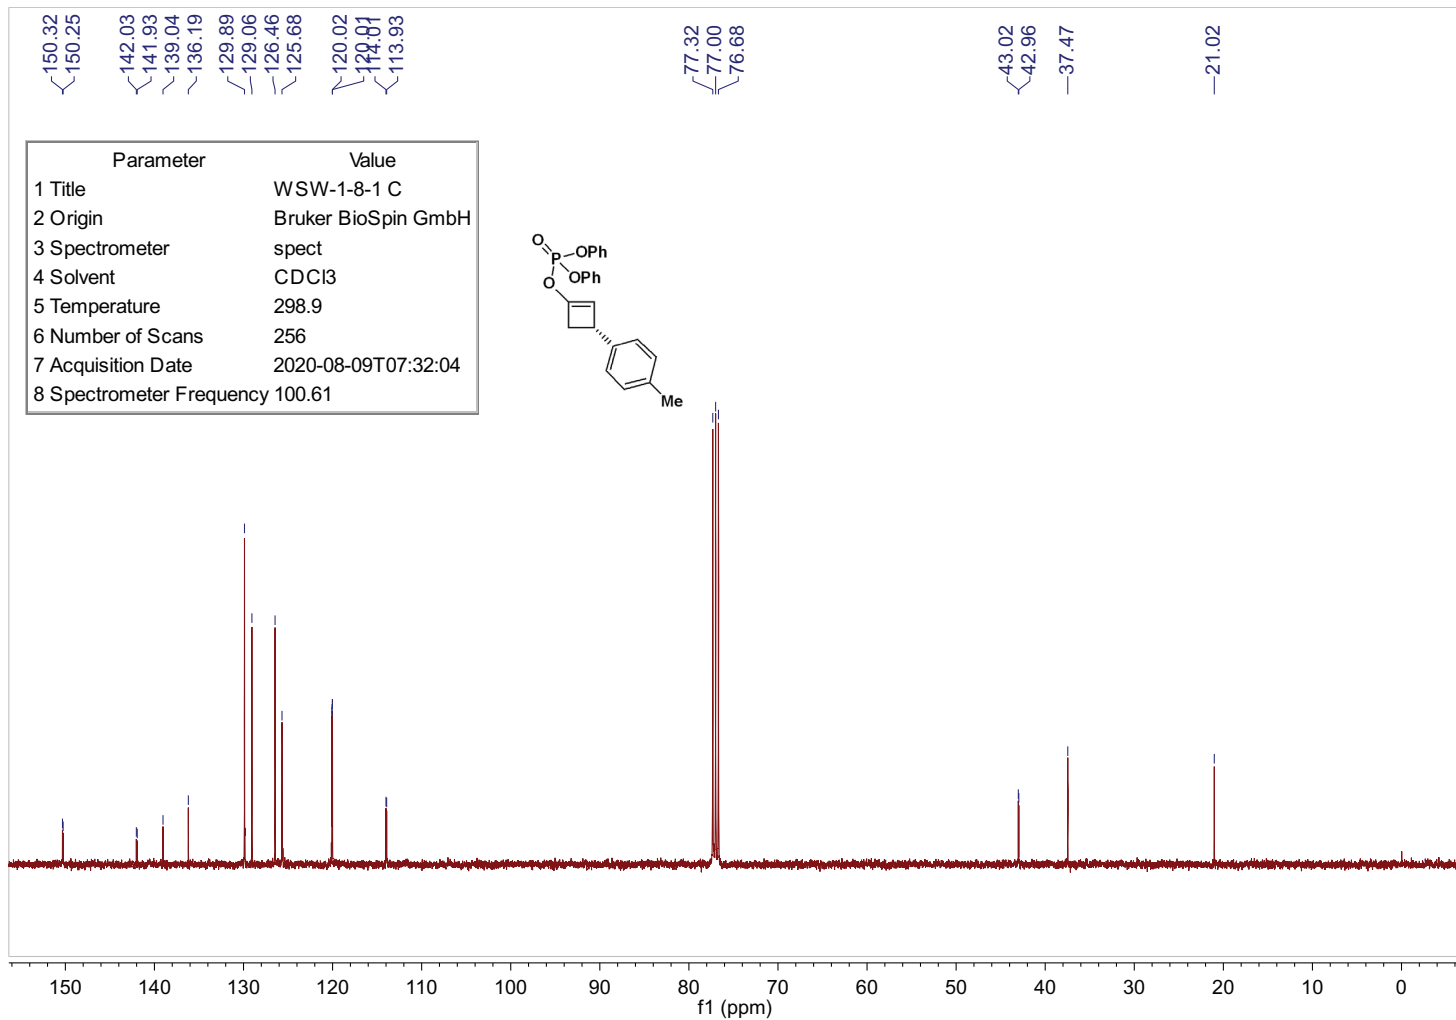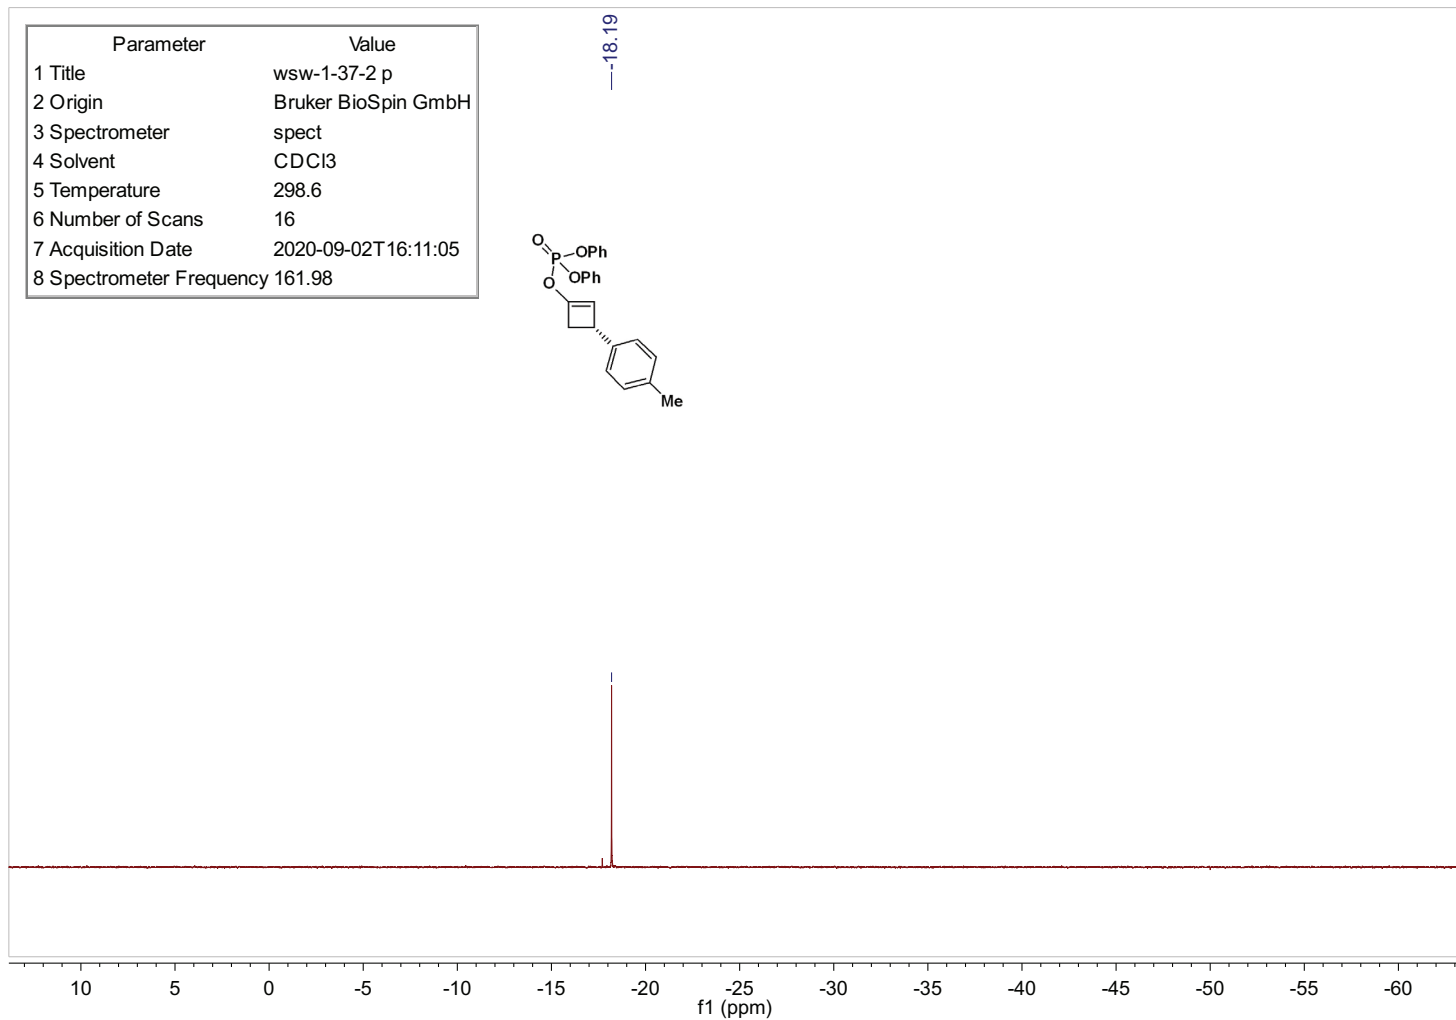

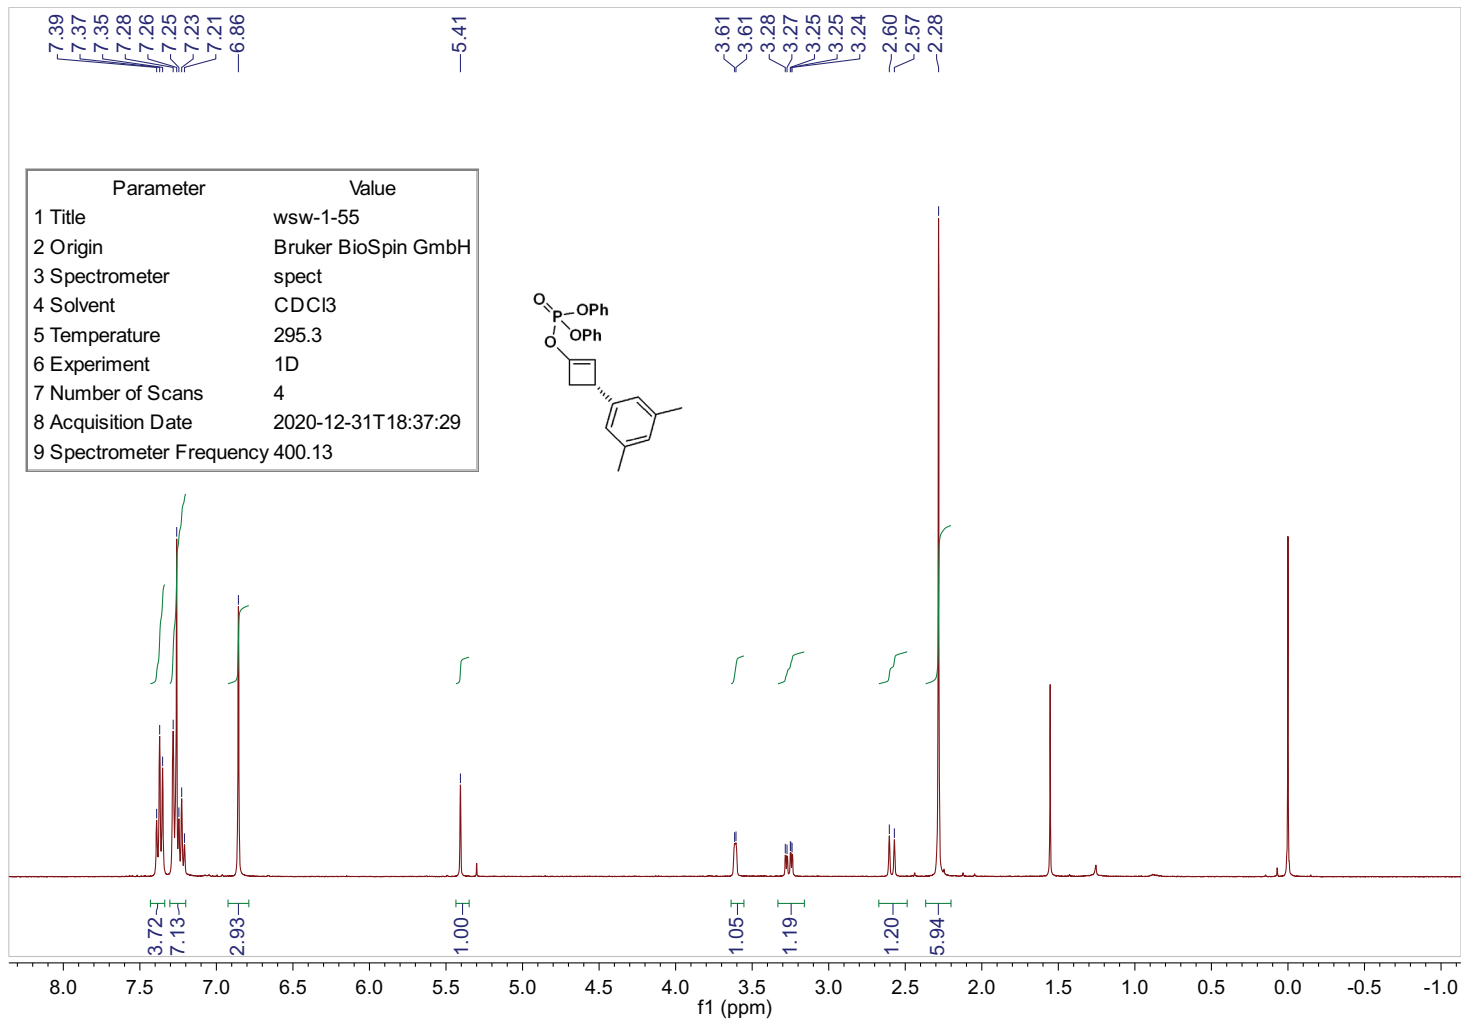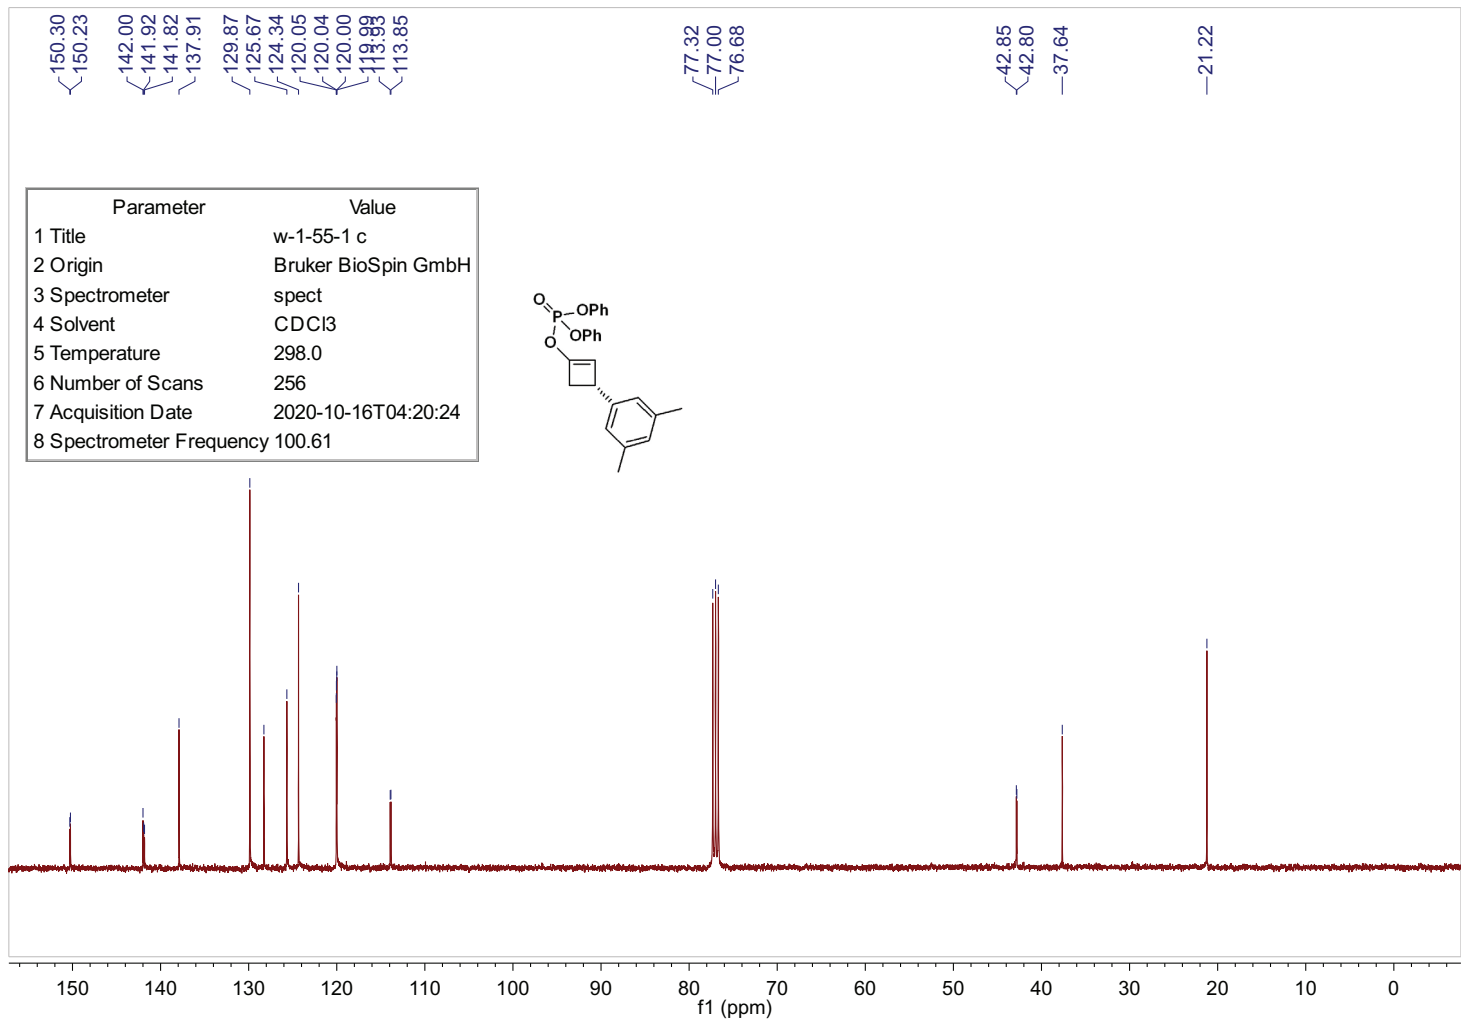

| Parameter                | Value               |
|--------------------------|---------------------|
| 1 Title                  | w-1-55-1 p          |
| 2 Origin                 | Bruker BioSpin GmbH |
| 3 Spectrometer           | spect               |
| 4 Solvent                | CDCl3               |
| 5 Temperature            | 297.7               |
| 6 Number of Scans        | 16                  |
| 7 Acquisition Date       | 2020-10-16T03:41:52 |
| 8 Spectrometer Frequency | 161.98              |

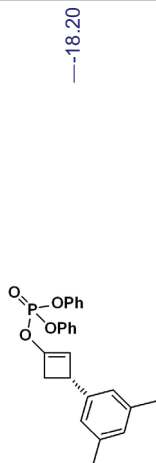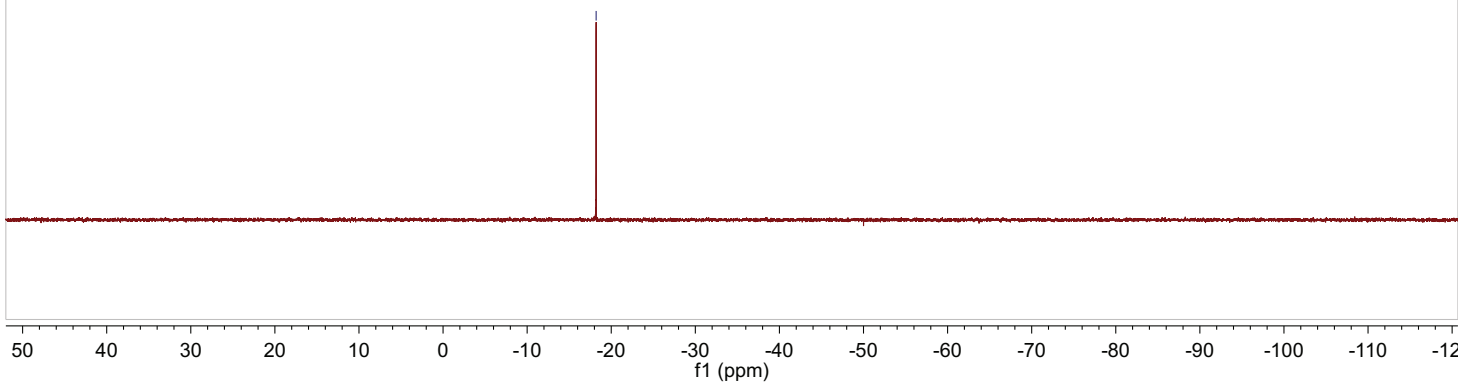

| Parameter                | Value               |
|--------------------------|---------------------|
| 1 Title                  | w-1-38-1            |
| 2 Origin                 | Bruker BioSpin GmbH |
| 3 Spectrometer           | spect               |
| 4 Solvent                | CDCl3               |
| 5 Temperature            | 298.1               |
| 6 Number of Scans        | 4                   |
| 7 Acquisition Date       | 2020-09-03T23:23:13 |
| 8 Spectrometer Frequency | 400.13              |

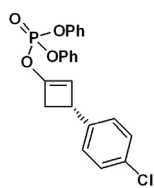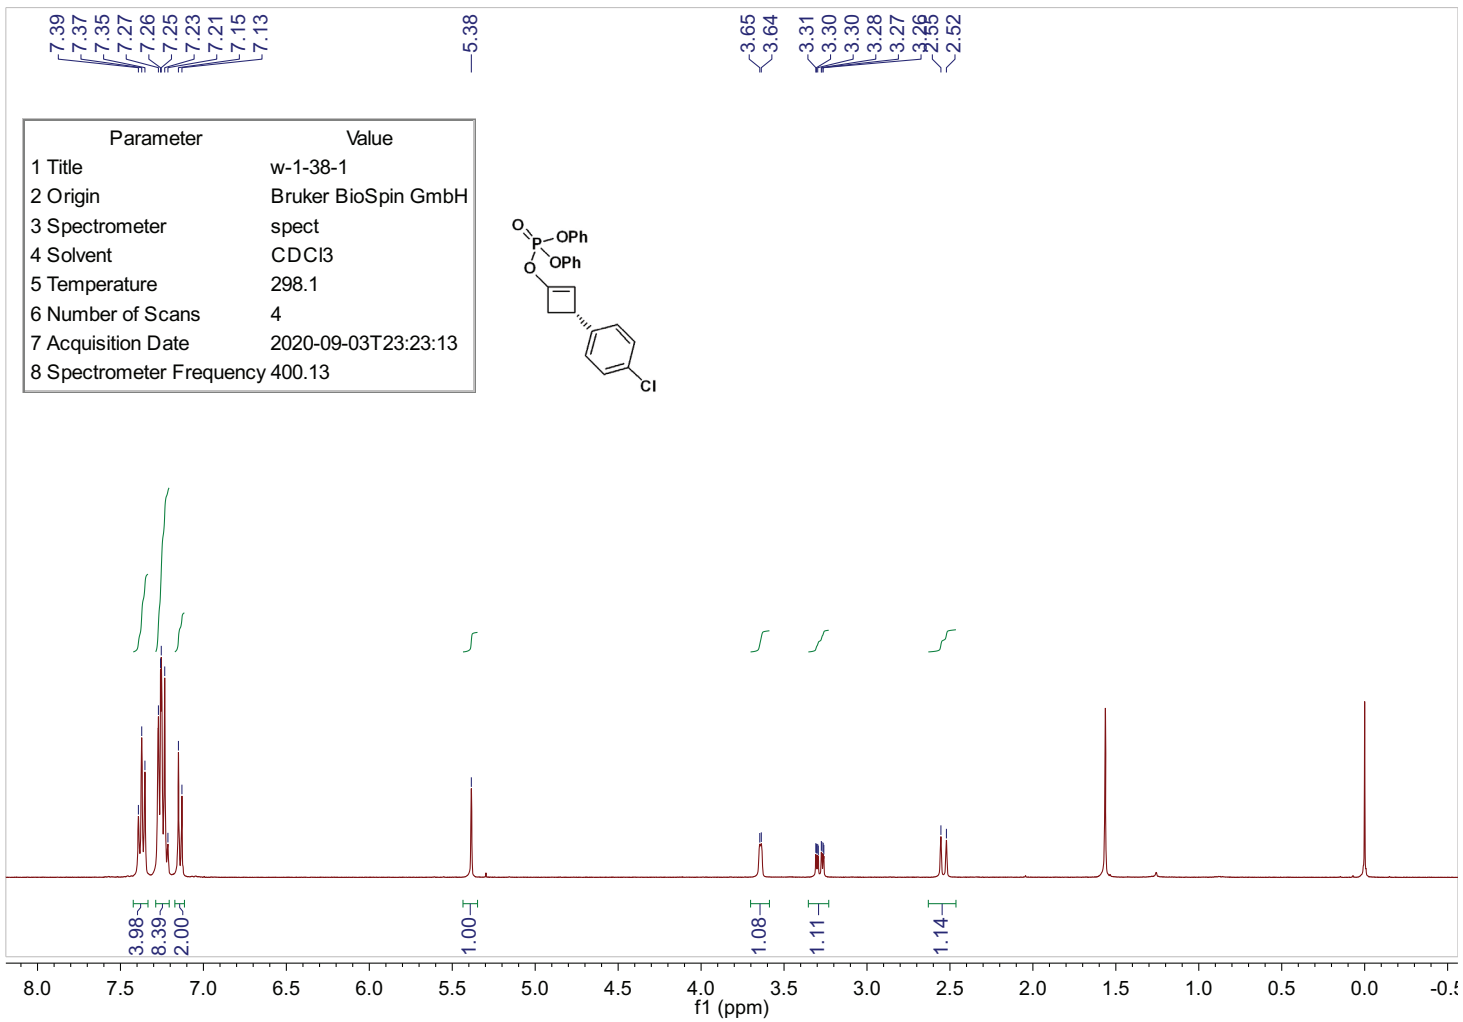

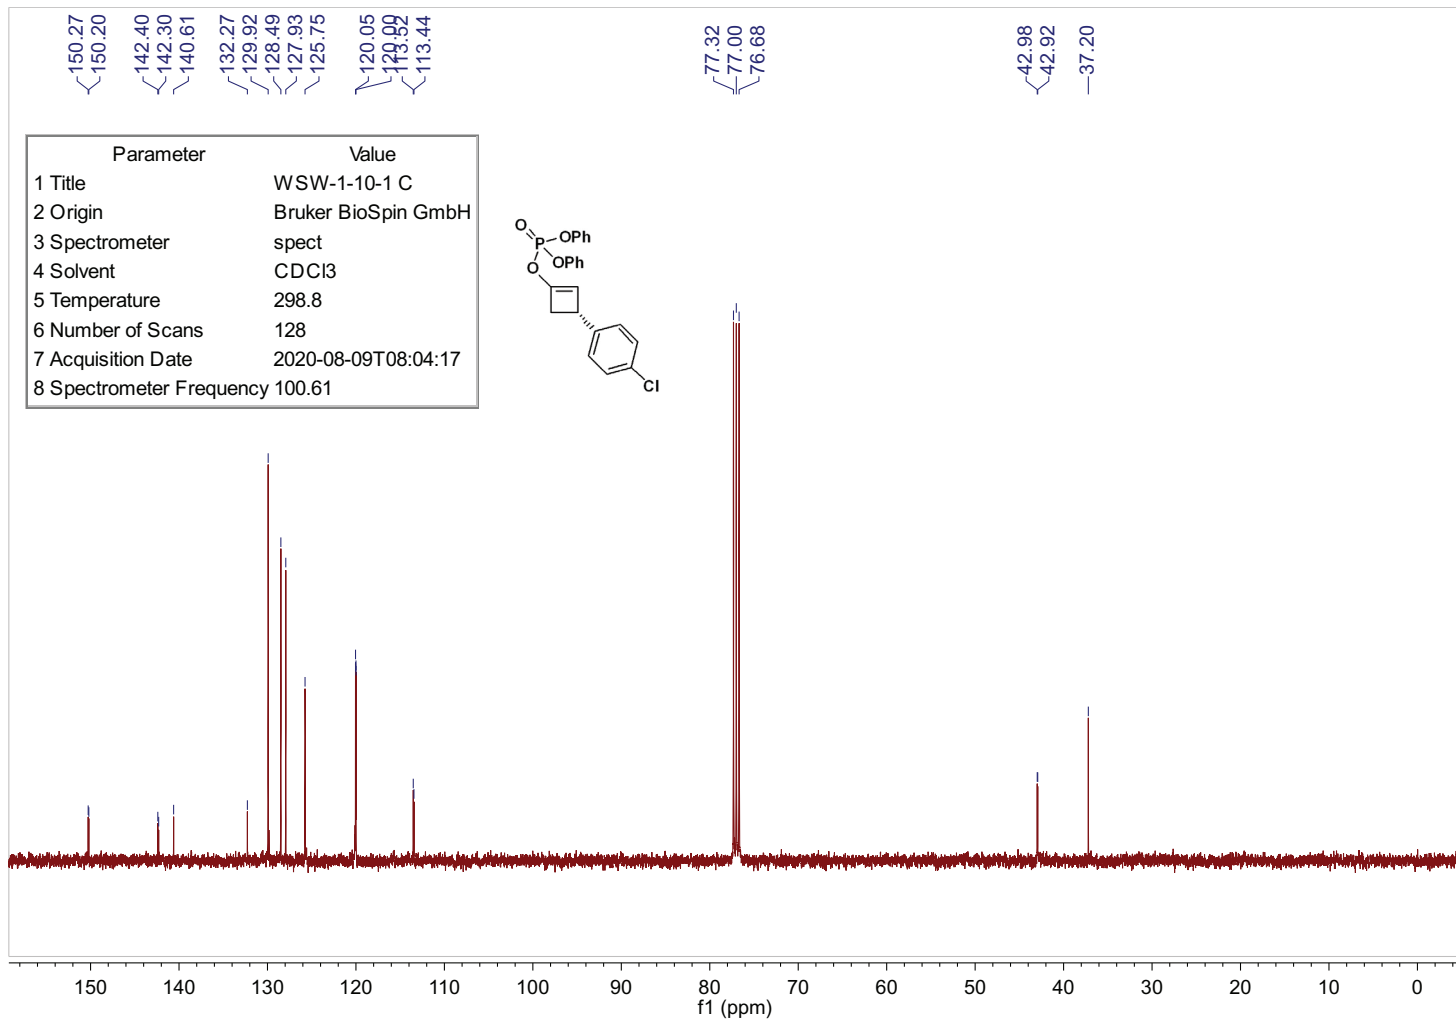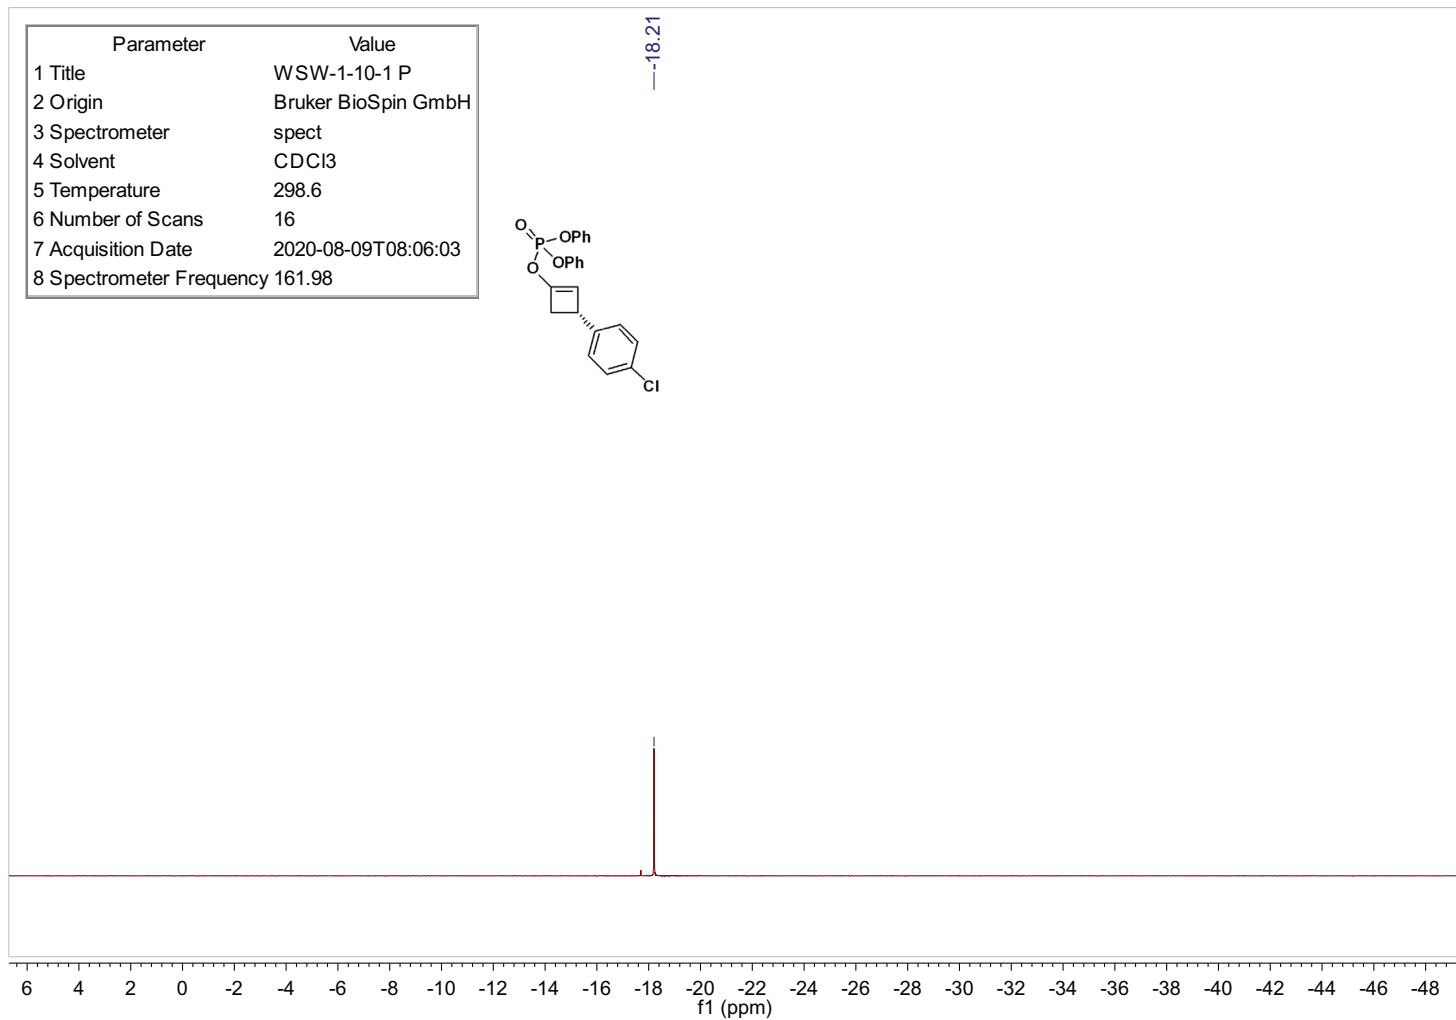

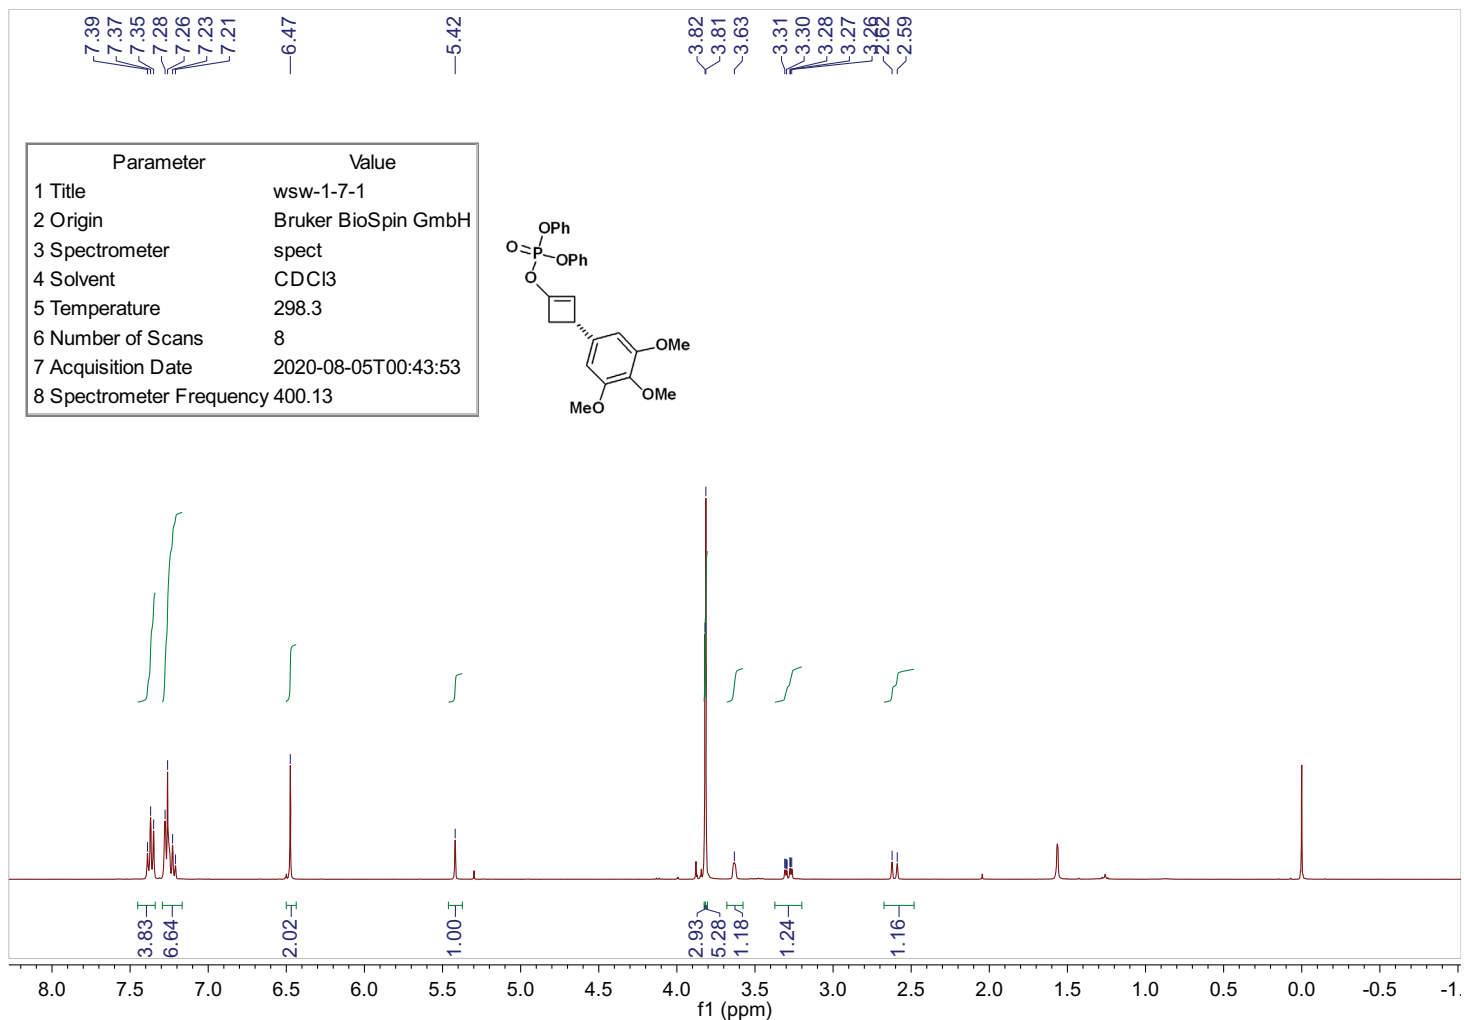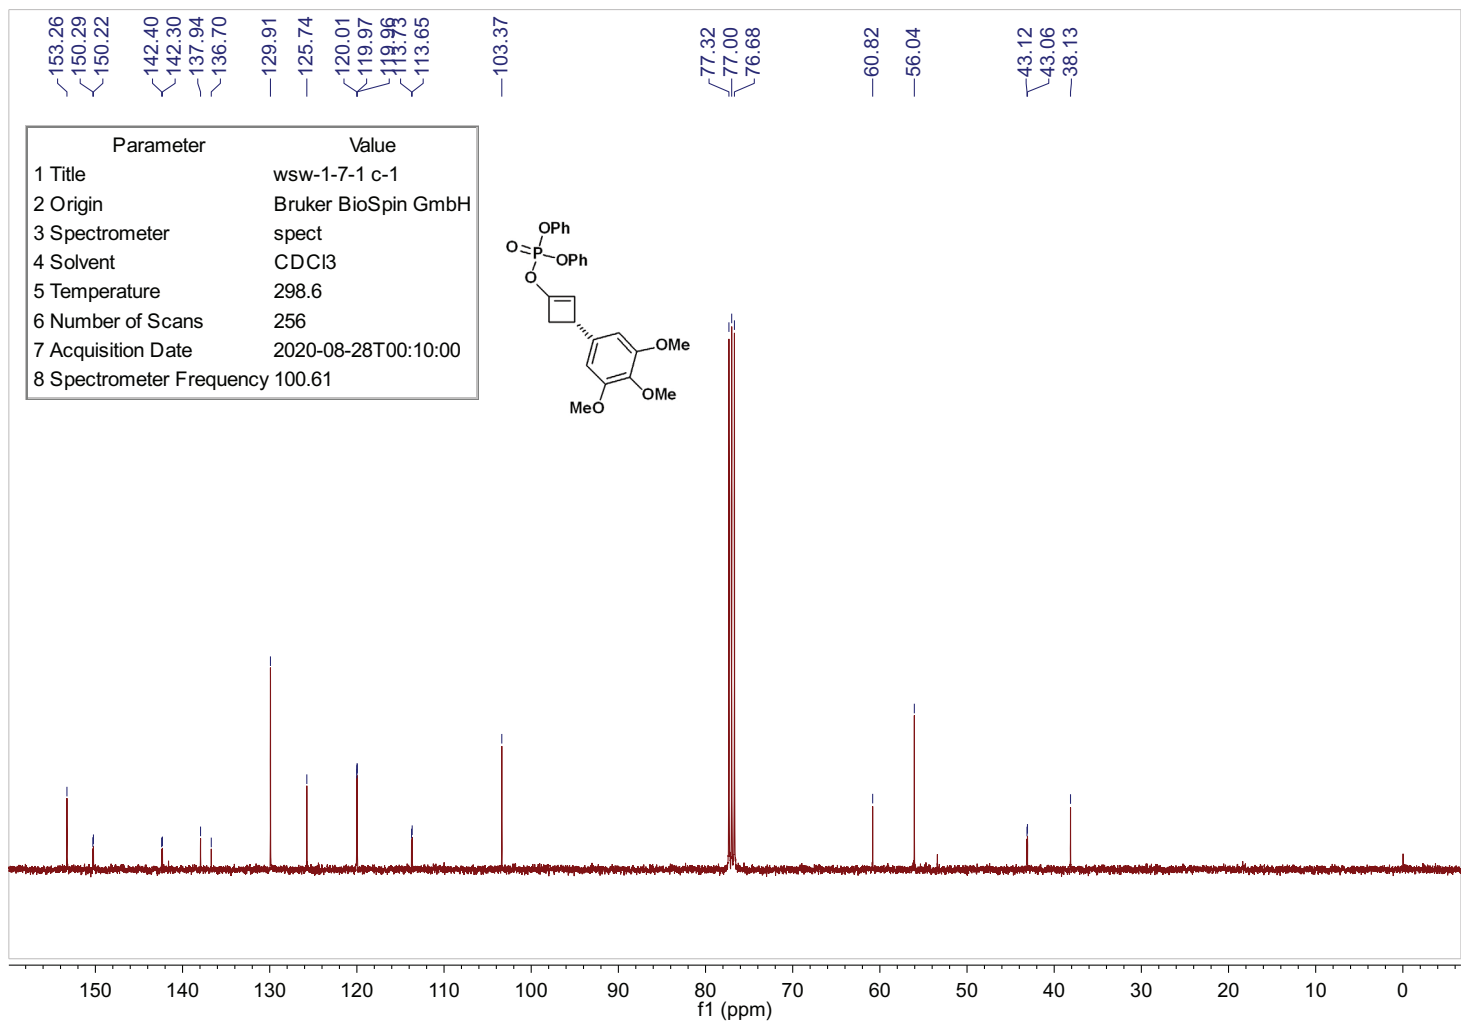

| Parameter                | Value               |
|--------------------------|---------------------|
| 1 Title                  | WSW-1-7-1 P         |
| 2 Origin                 | Bruker BioSpin GmbH |
| 3 Spectrometer           | spect               |
| 4 Solvent                | CDCl3               |
| 5 Temperature            | 298.8               |
| 6 Number of Scans        | 16                  |
| 7 Acquisition Date       | 2020-08-09T07:14:27 |
| 8 Spectrometer Frequency | 161.98              |

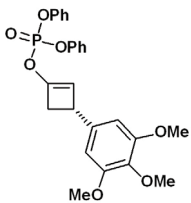

---18.16

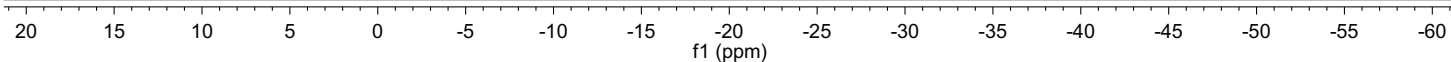

7.91  
7.89  
7.39  
7.37  
7.35  
7.28  
7.28  
7.26  
7.26  
7.26  
7.25  
7.25  
7.24  
7.24  
7.23  
7.21  
7.21  
-5.42

3.72  
3.71  
3.71  
3.33  
3.30  
3.30  
3.29  
3.29  
2.56  
-1.59

| Parameter                | Value               |
|--------------------------|---------------------|
| 1 Title                  | zcx-9-15ac          |
| 2 Origin                 | Bruker BioSpin GmbH |
| 3 Spectrometer           | spect               |
| 4 Solvent                | CDCl3               |
| 5 Temperature            | 297.8               |
| 6 Number of Scans        | 4                   |
| 7 Acquisition Date       | 2020-10-13T18:28:14 |
| 8 Spectrometer Frequency | 400.13              |

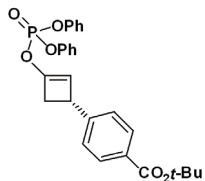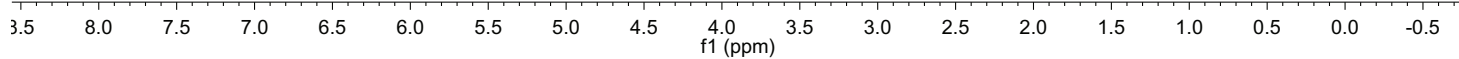



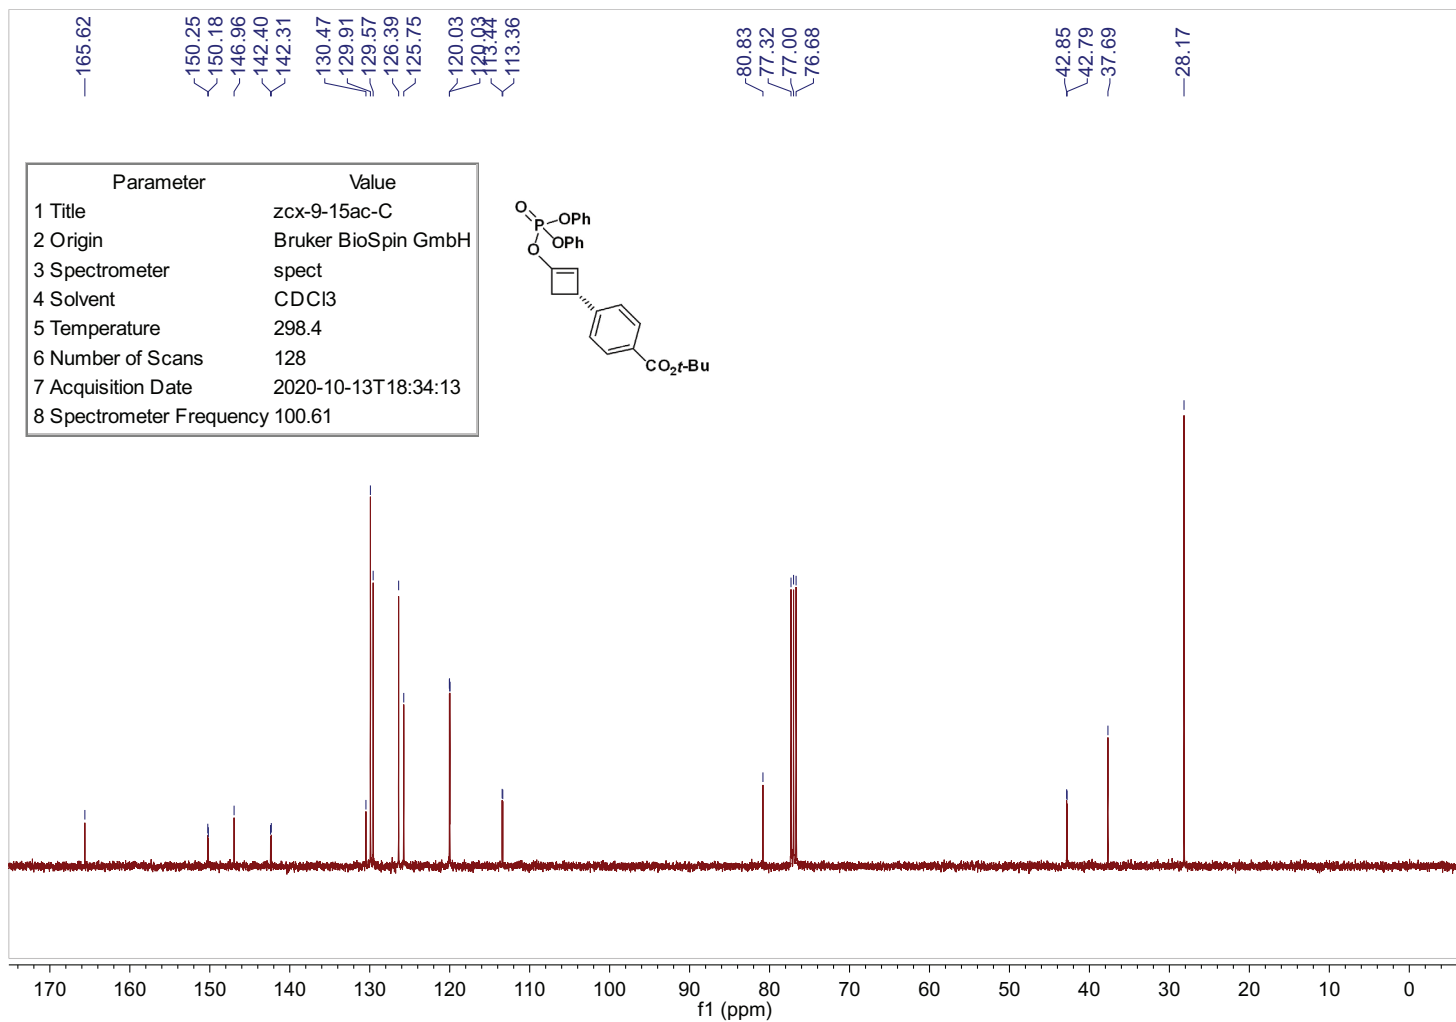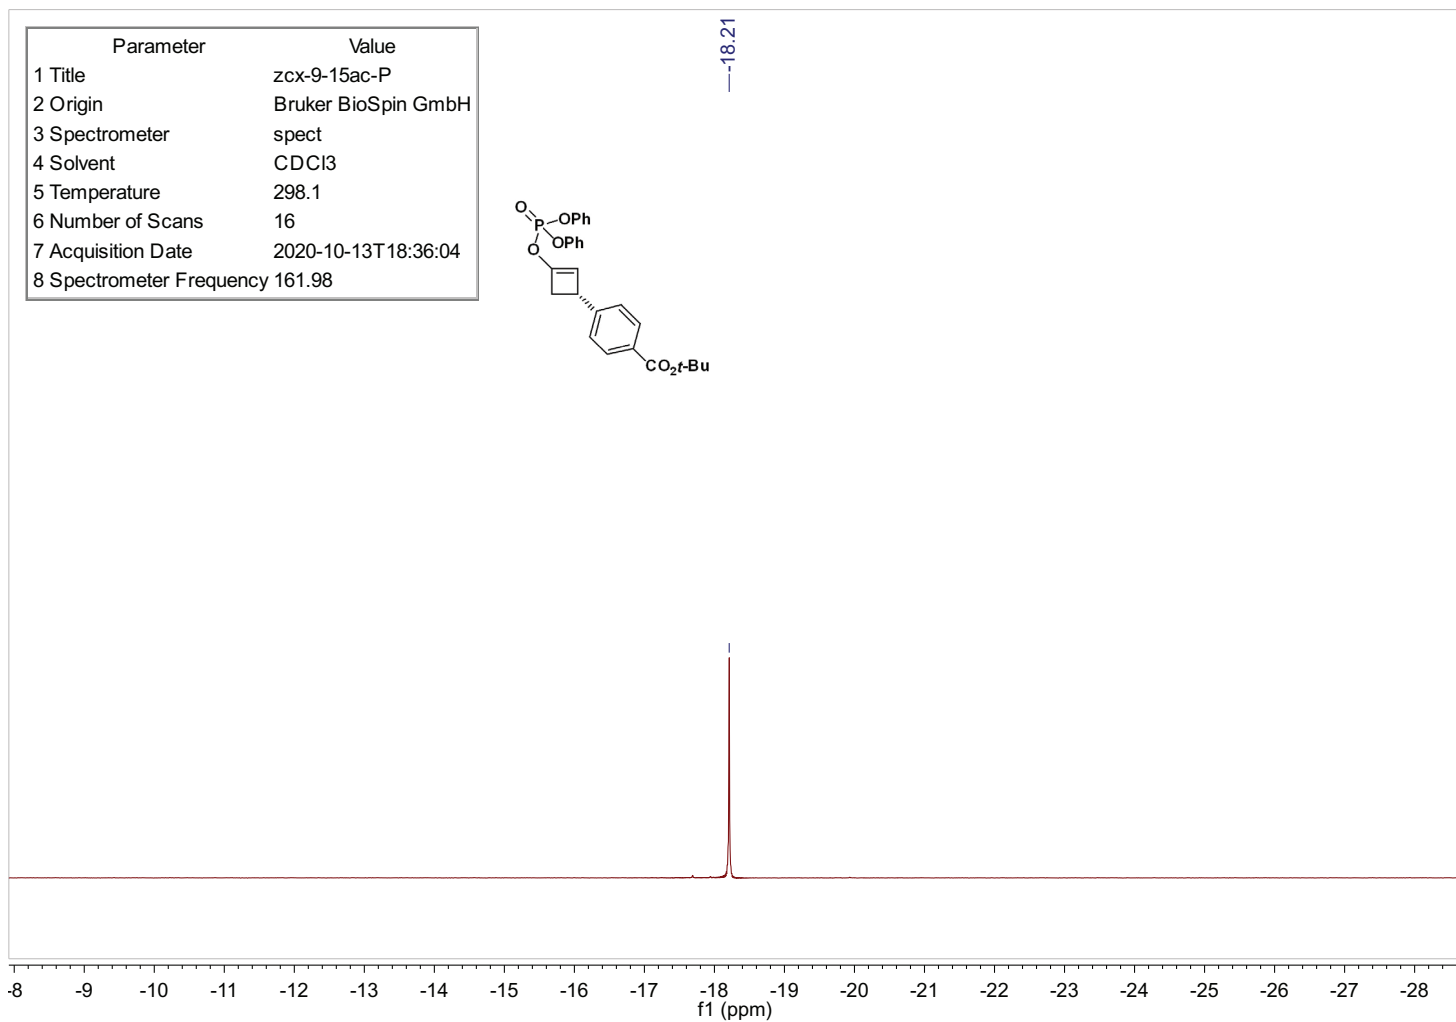

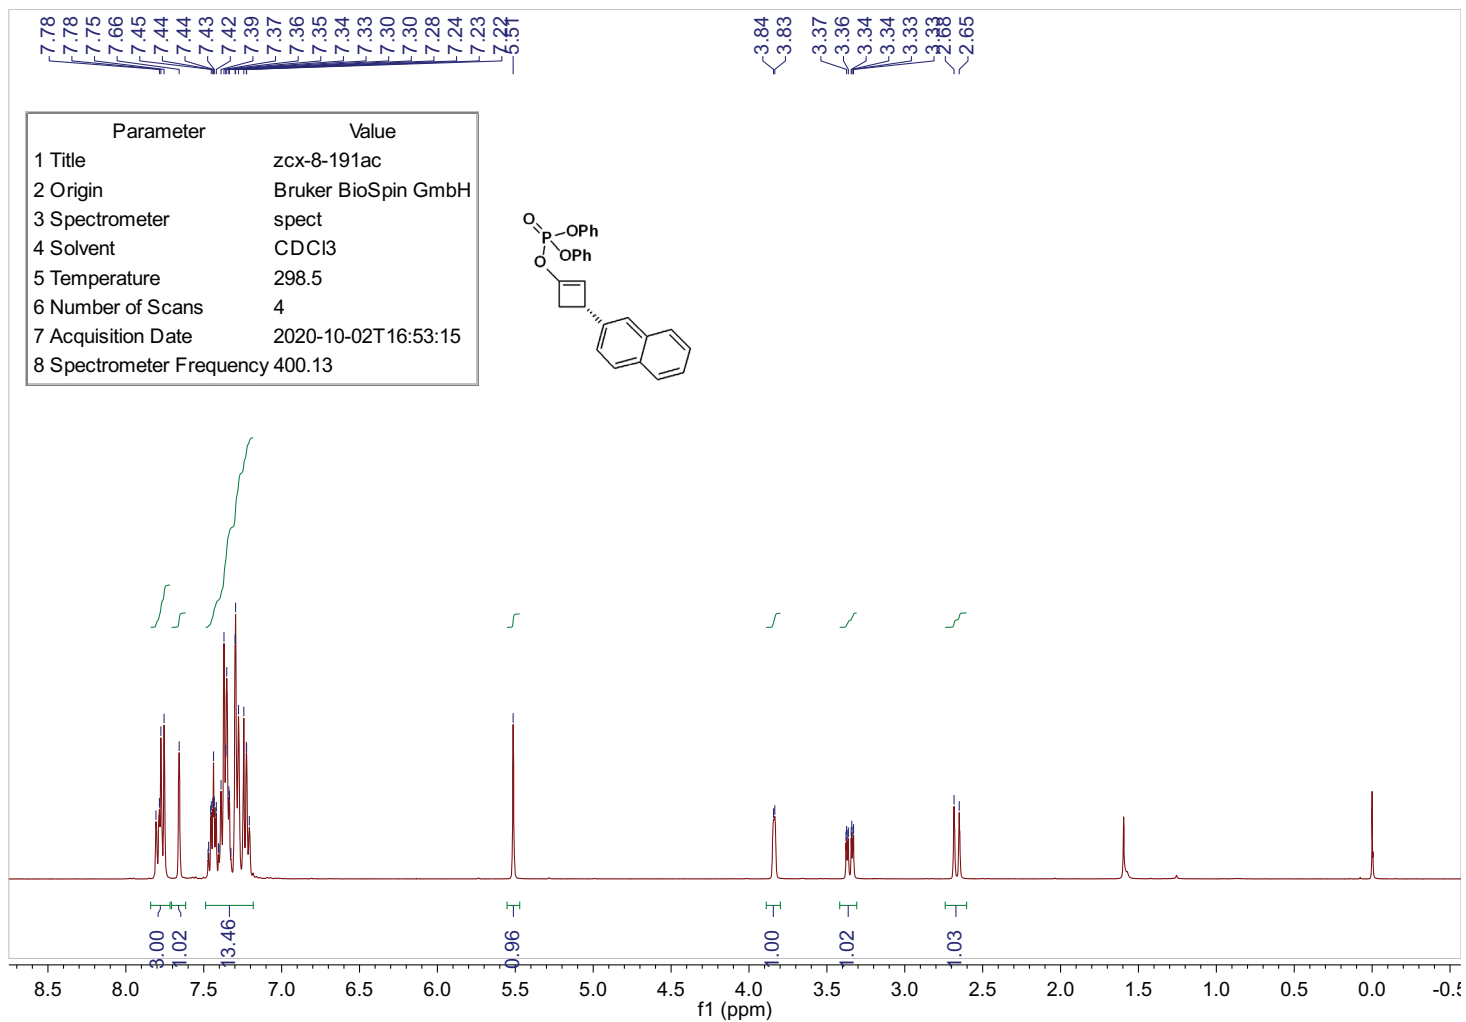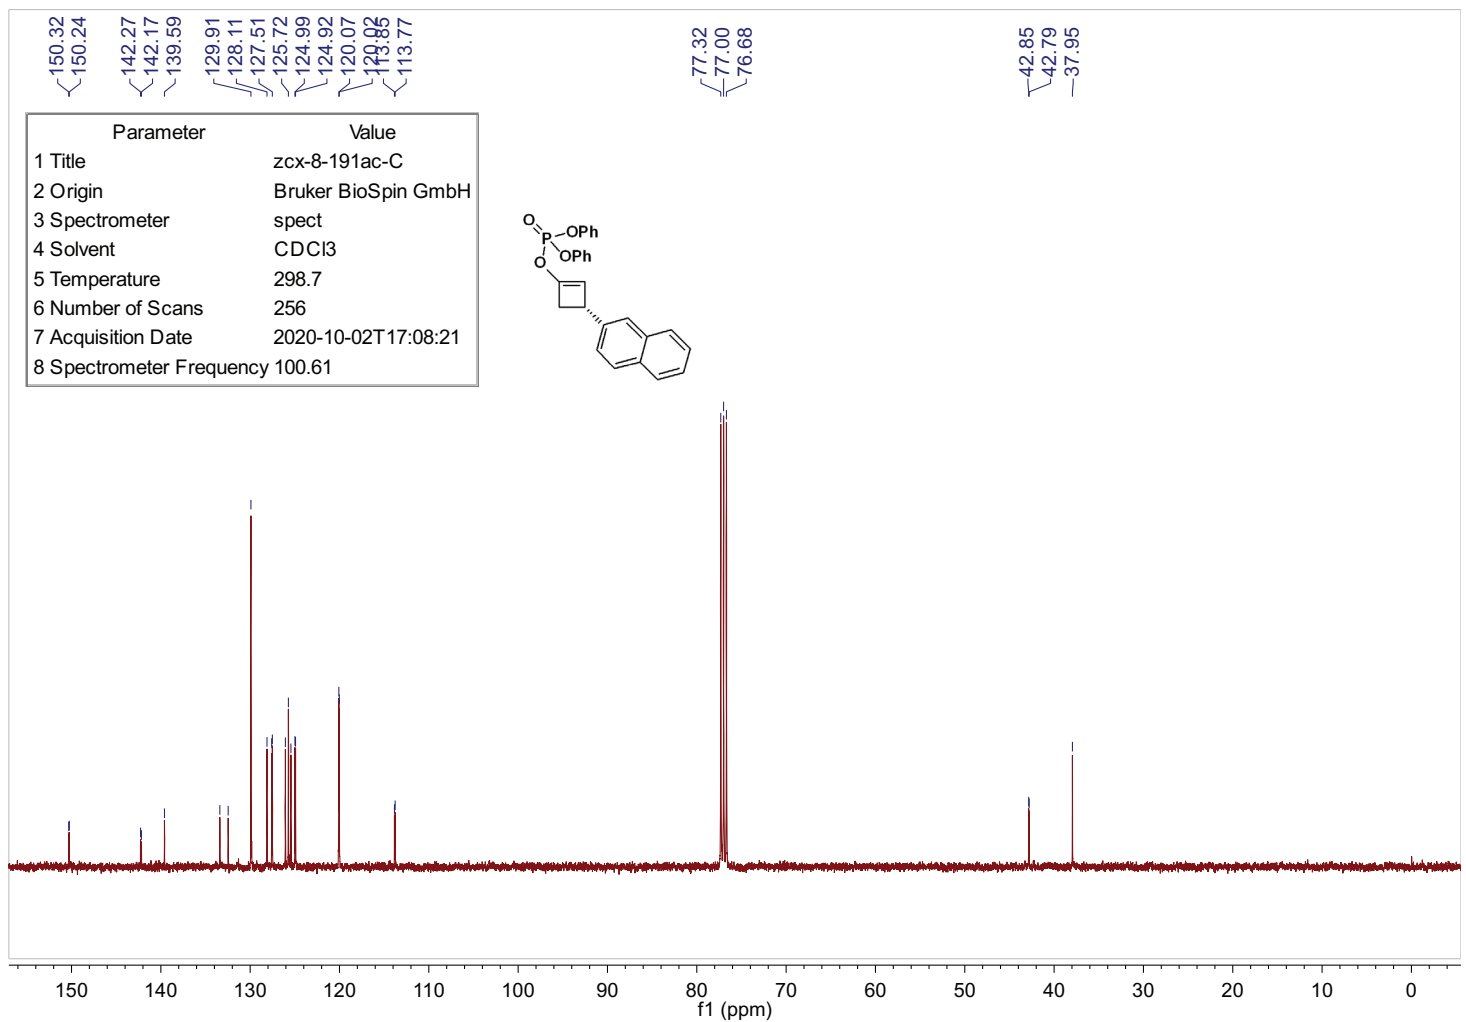

| Parameter                | Value               |
|--------------------------|---------------------|
| 1 Title                  | zcx-8-191ac-P       |
| 2 Origin                 | Bruker BioSpin GmbH |
| 3 Spectrometer           | spect               |
| 4 Solvent                | CDCl3               |
| 5 Temperature            | 299.5               |
| 6 Number of Scans        | 16                  |
| 7 Acquisition Date       | 2020-10-01T16:47:18 |
| 8 Spectrometer Frequency | 161.98              |

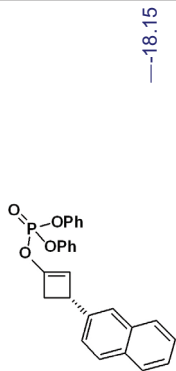

-18.15

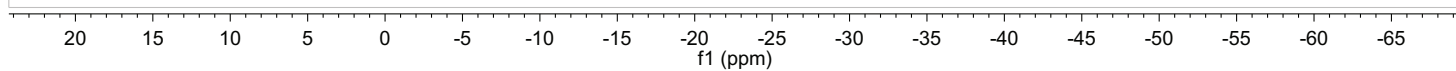

7.96  
7.86  
7.76  
7.74  
7.52  
7.52  
7.51  
7.50  
7.41  
7.39  
7.38  
7.36  
7.36  
7.35  
7.34  
7.28  
7.26  
7.24  
7.23  
5.67

-4.34

3.56  
3.55  
3.52  
3.51

2.64  
2.60

| Parameter                | Value               |
|--------------------------|---------------------|
| 1 Title                  | wsw-1-56            |
| 2 Origin                 | Bruker BioSpin GmbH |
| 3 Spectrometer           | spect               |
| 4 Solvent                | CDCl3               |
| 5 Temperature            | 295.0               |
| 6 Experiment             | 1D                  |
| 7 Number of Scans        | 4                   |
| 8 Acquisition Date       | 2021-01-03T02:45:57 |
| 9 Spectrometer Frequency | 400.13              |

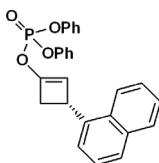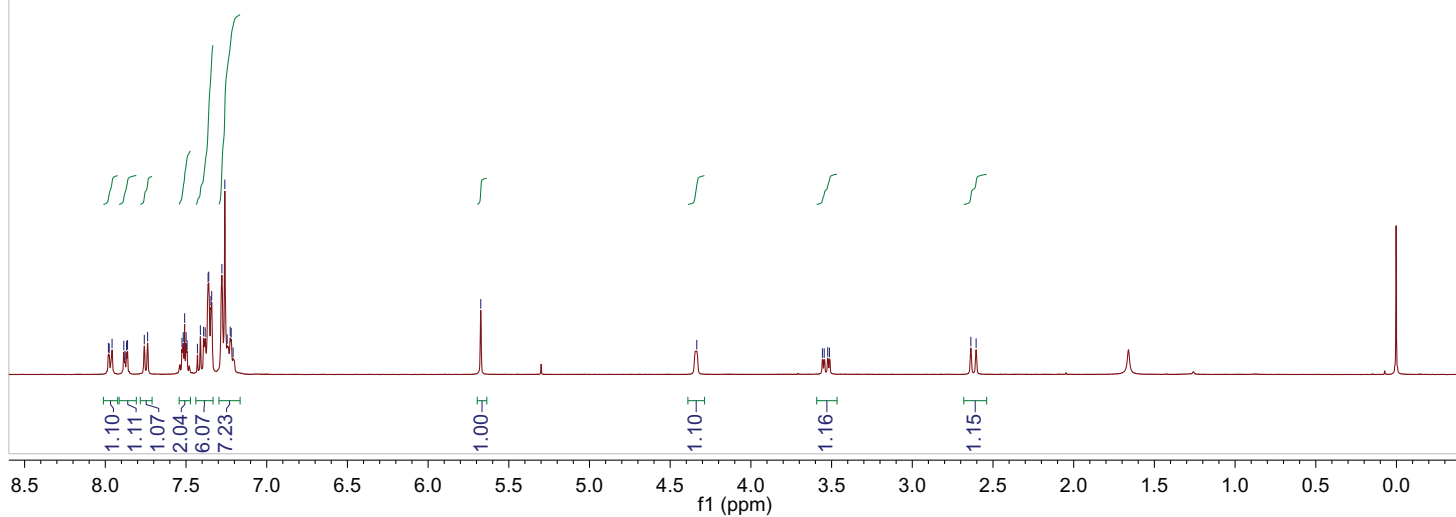

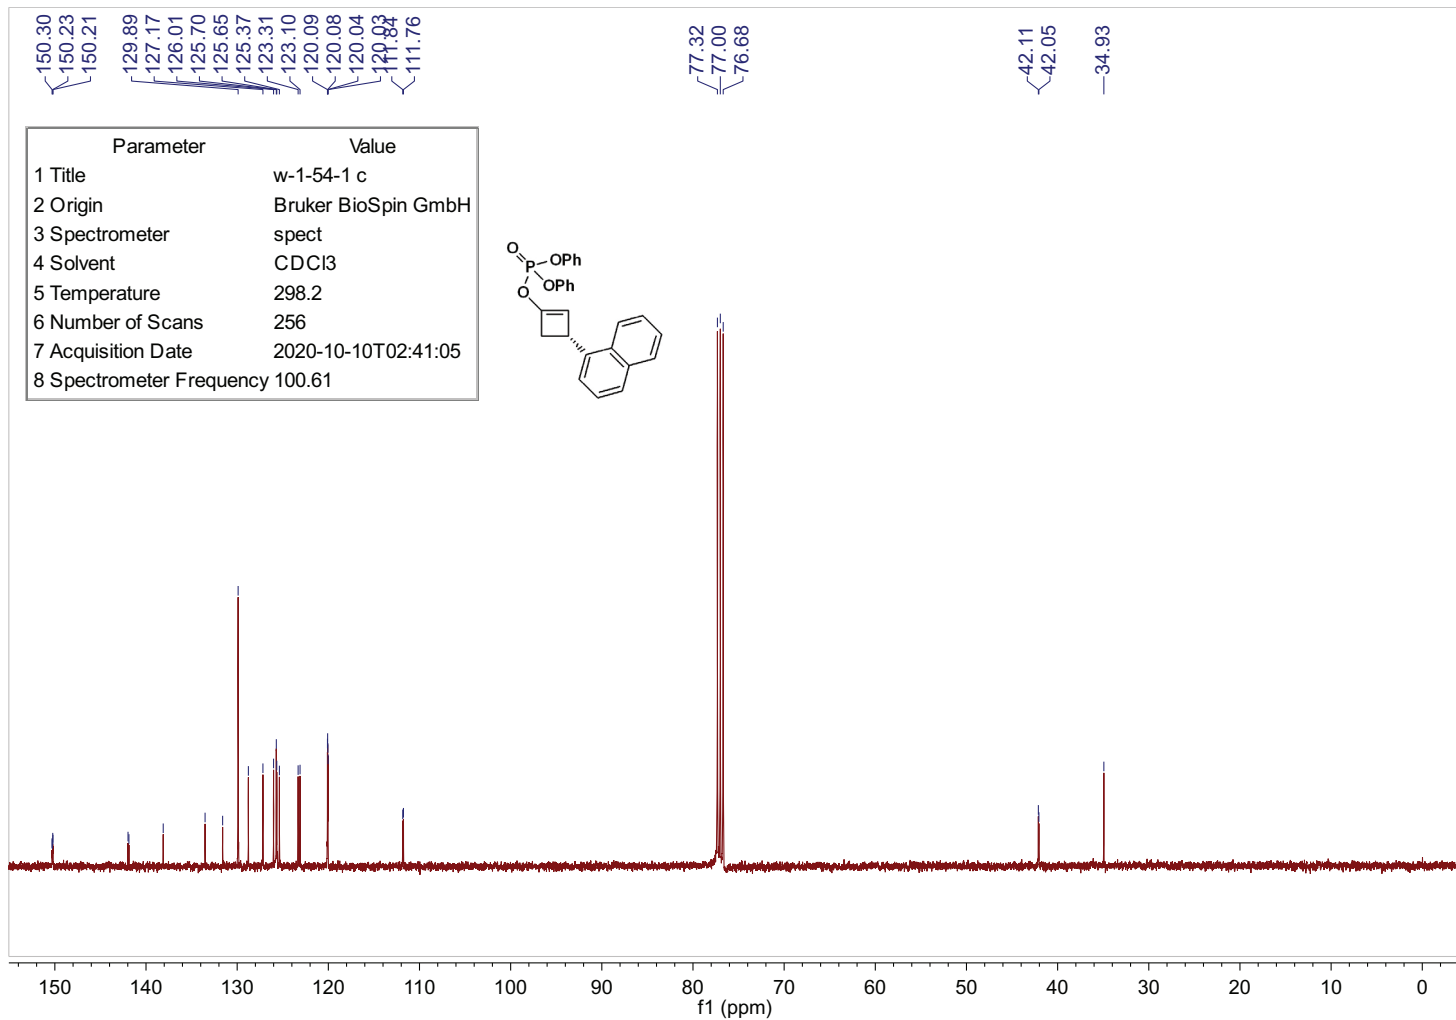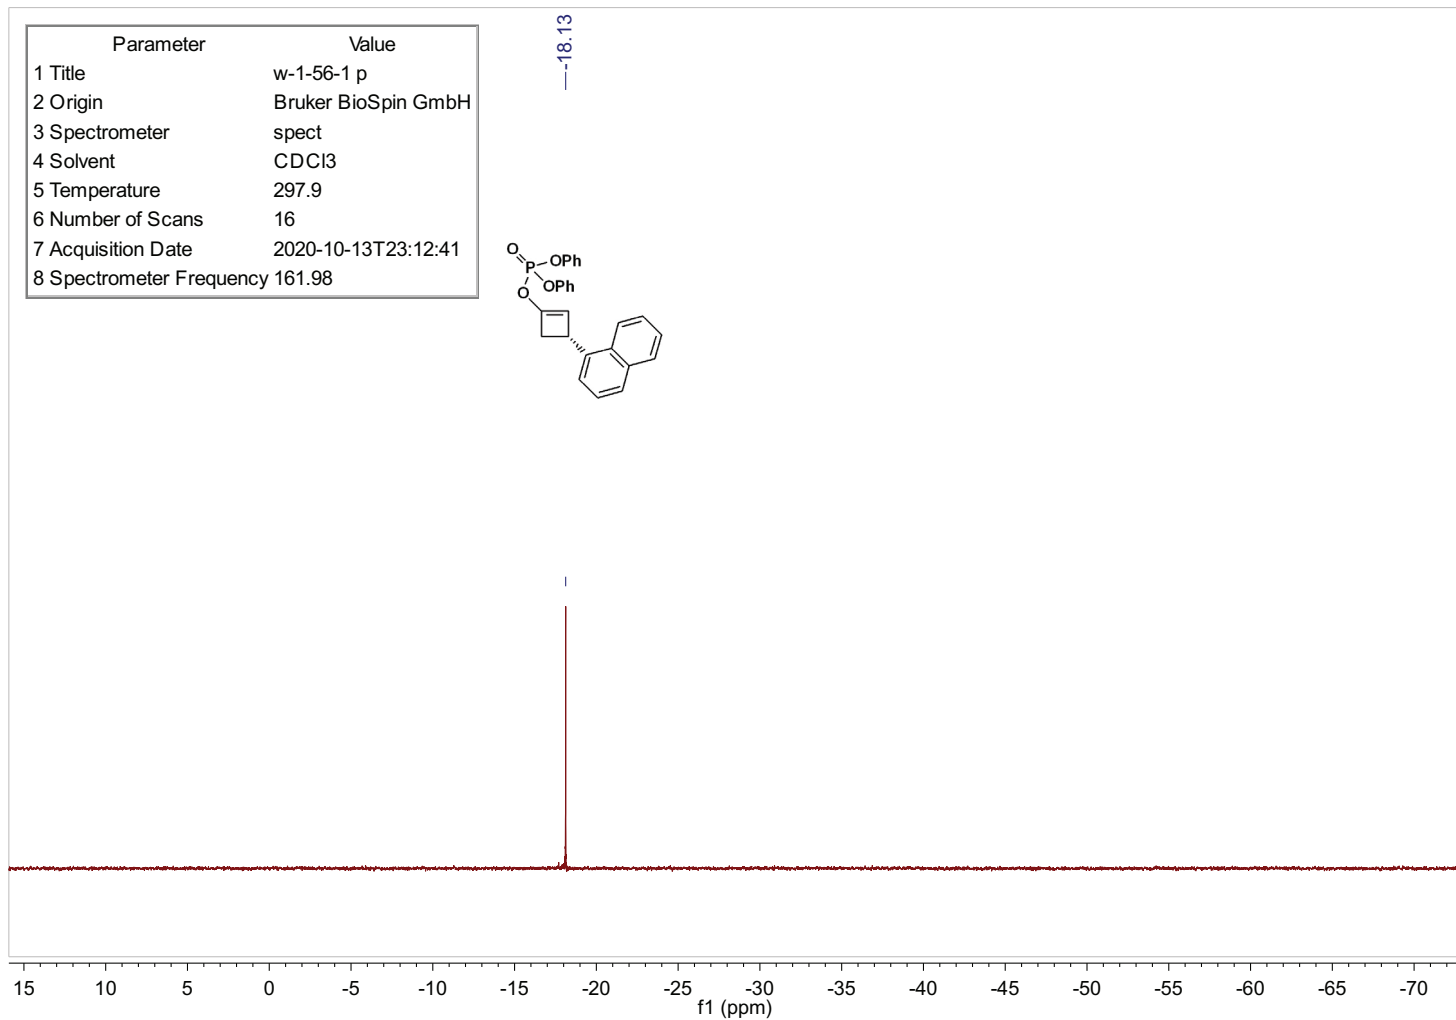

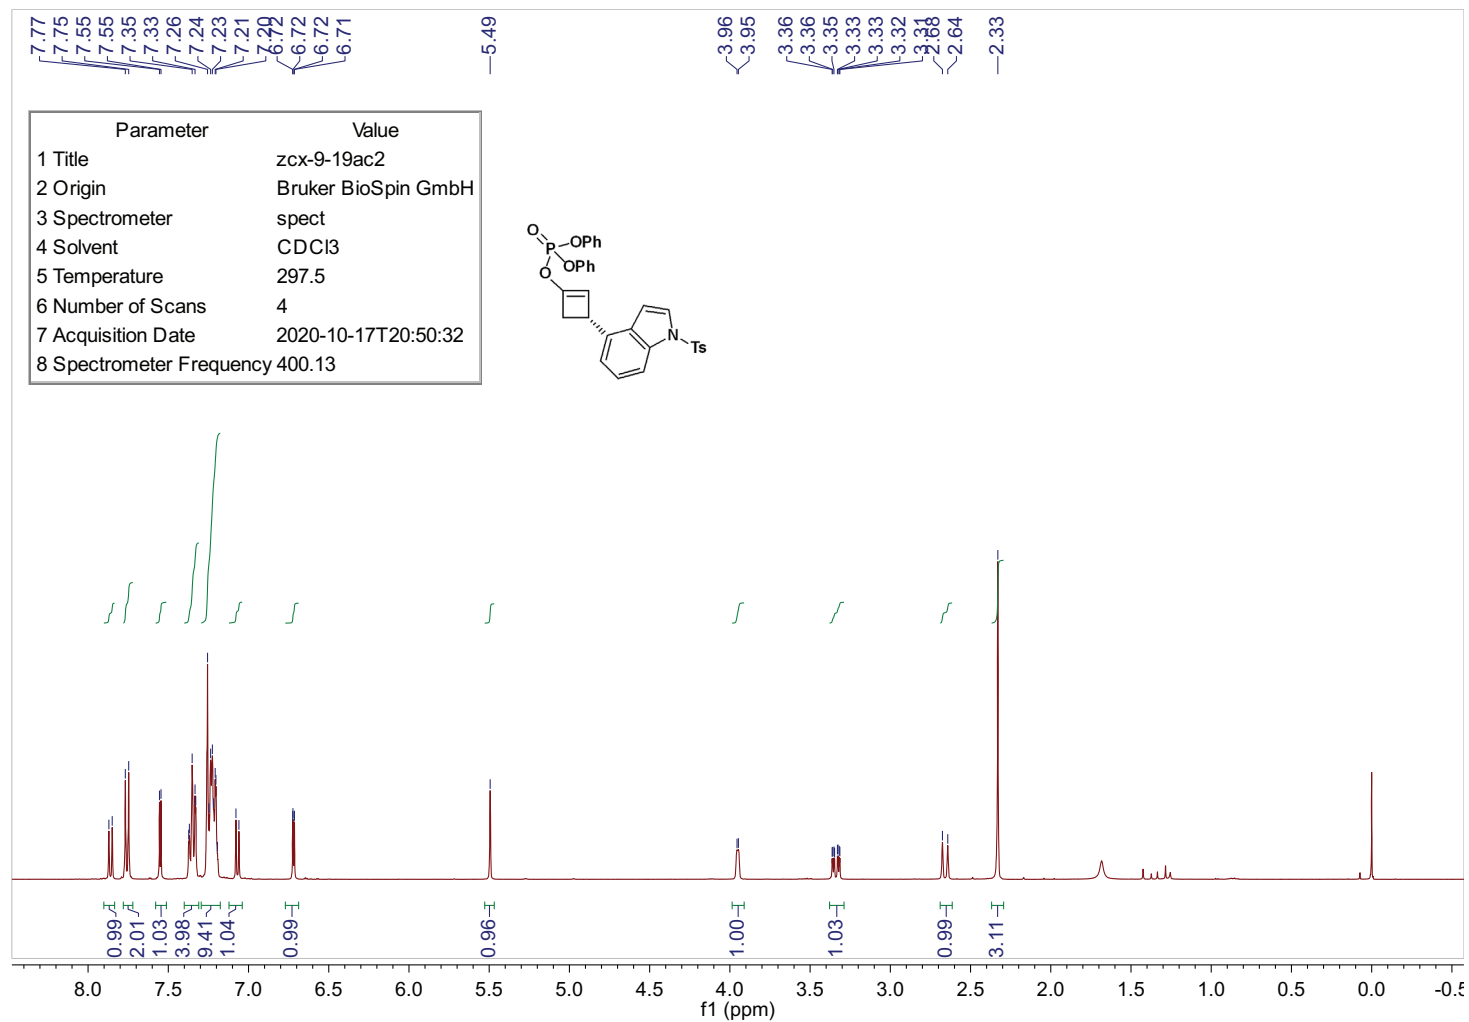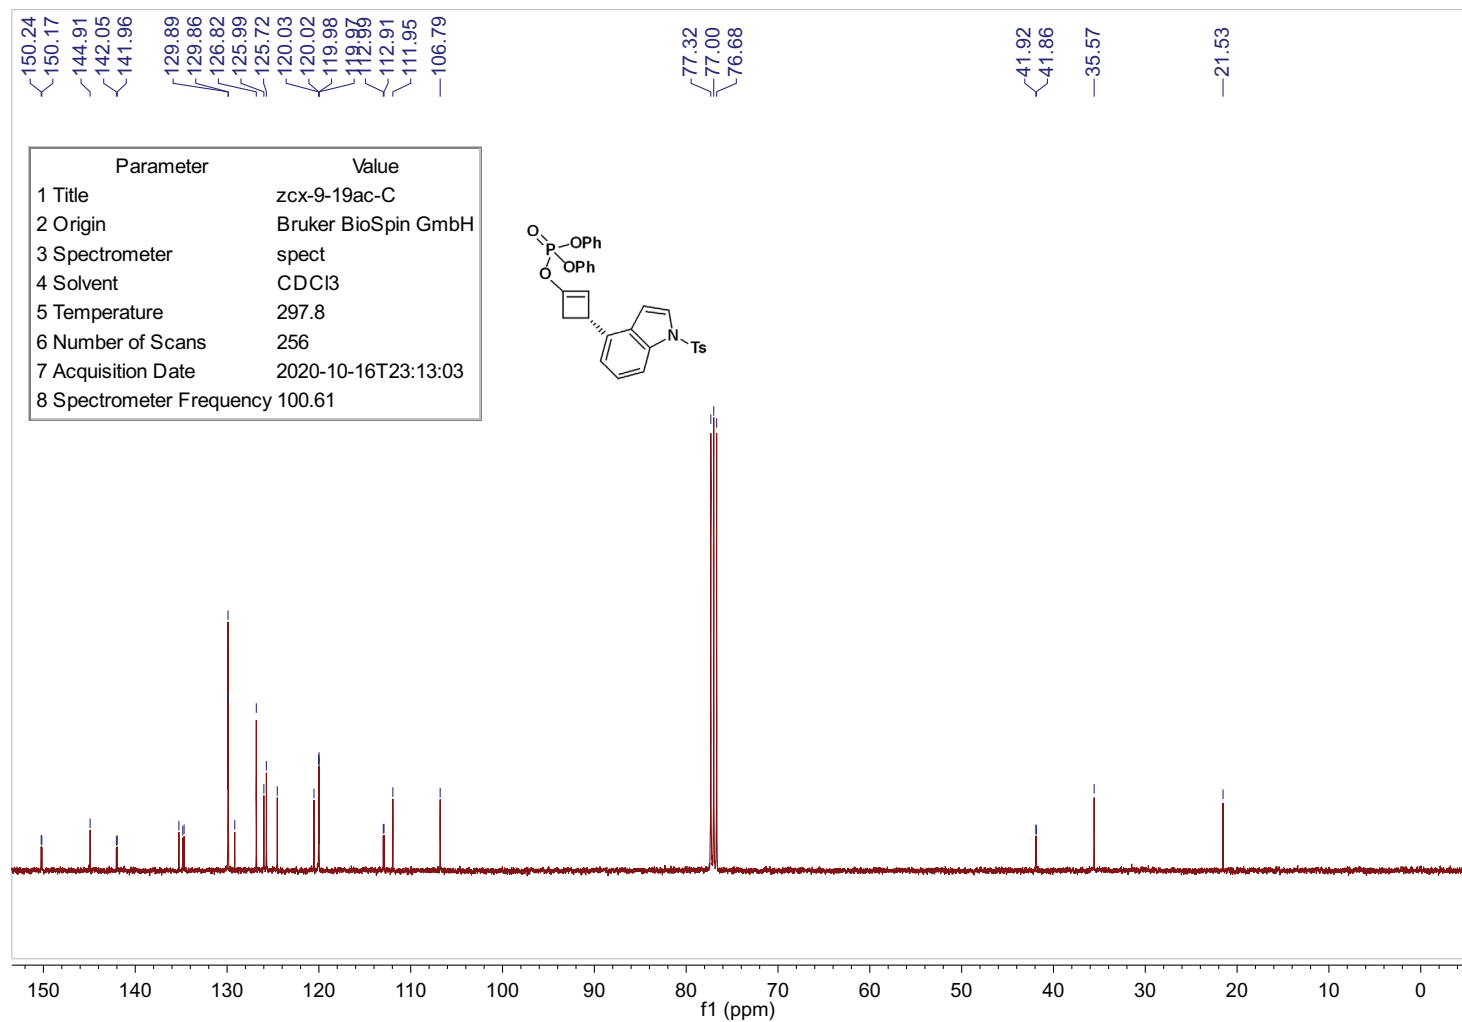

| Parameter                | Value               |
|--------------------------|---------------------|
| 1 Title                  | zcx-9-19ac-P        |
| 2 Origin                 | Bruker BioSpin GmbH |
| 3 Spectrometer           | spect               |
| 4 Solvent                | CDCl3               |
| 5 Temperature            | 297.6               |
| 6 Number of Scans        | 16                  |
| 7 Acquisition Date       | 2020-10-16T23:14:54 |
| 8 Spectrometer Frequency | 161.98              |

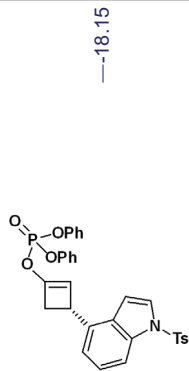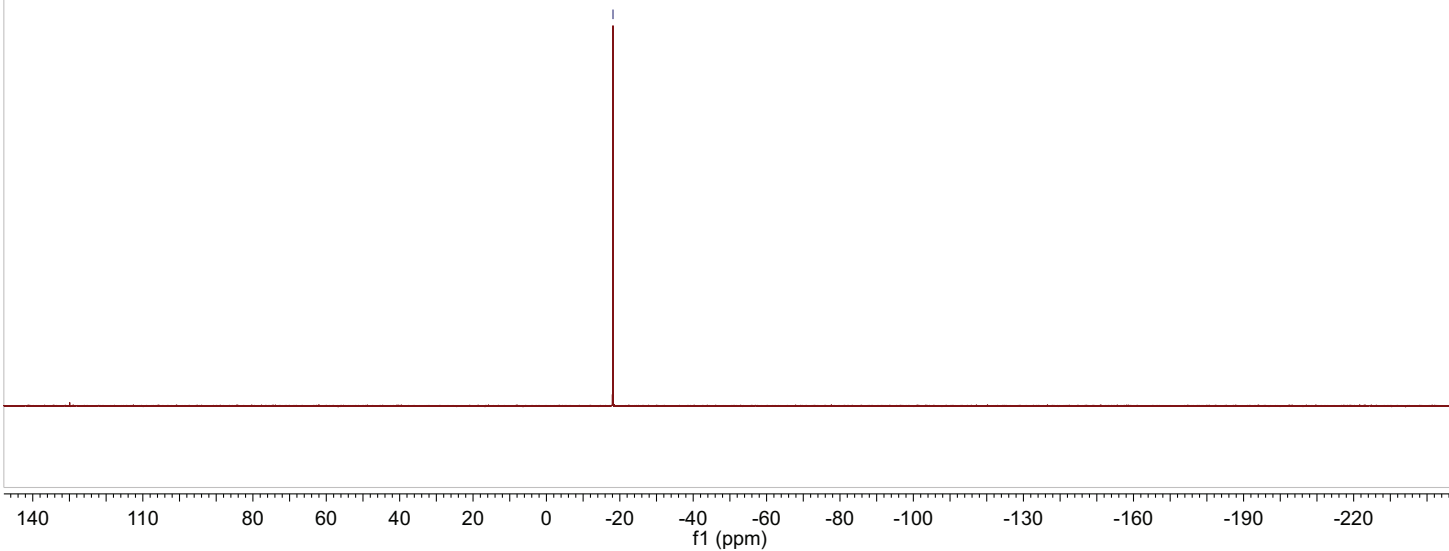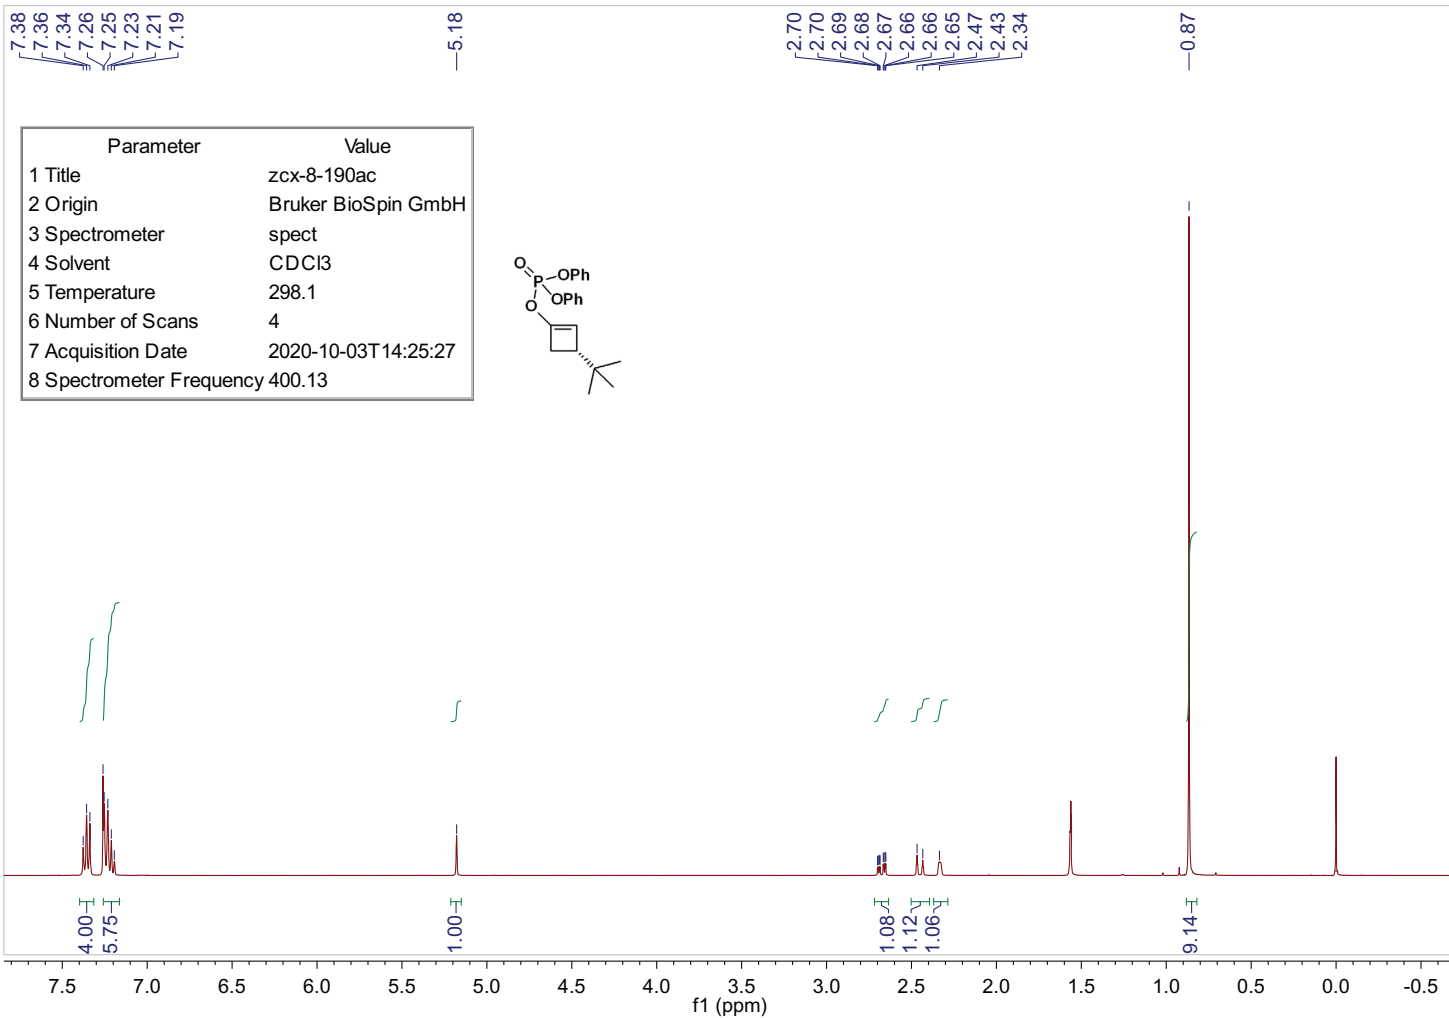

| Parameter                | Value               |
|--------------------------|---------------------|
| 1 Title                  | zcx-8-190ac         |
| 2 Origin                 | Bruker BioSpin GmbH |
| 3 Spectrometer           | spect               |
| 4 Solvent                | CDCl3               |
| 5 Temperature            | 298.1               |
| 6 Number of Scans        | 4                   |
| 7 Acquisition Date       | 2020-10-03T14:25:27 |
| 8 Spectrometer Frequency | 400.13              |

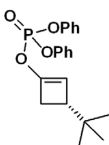

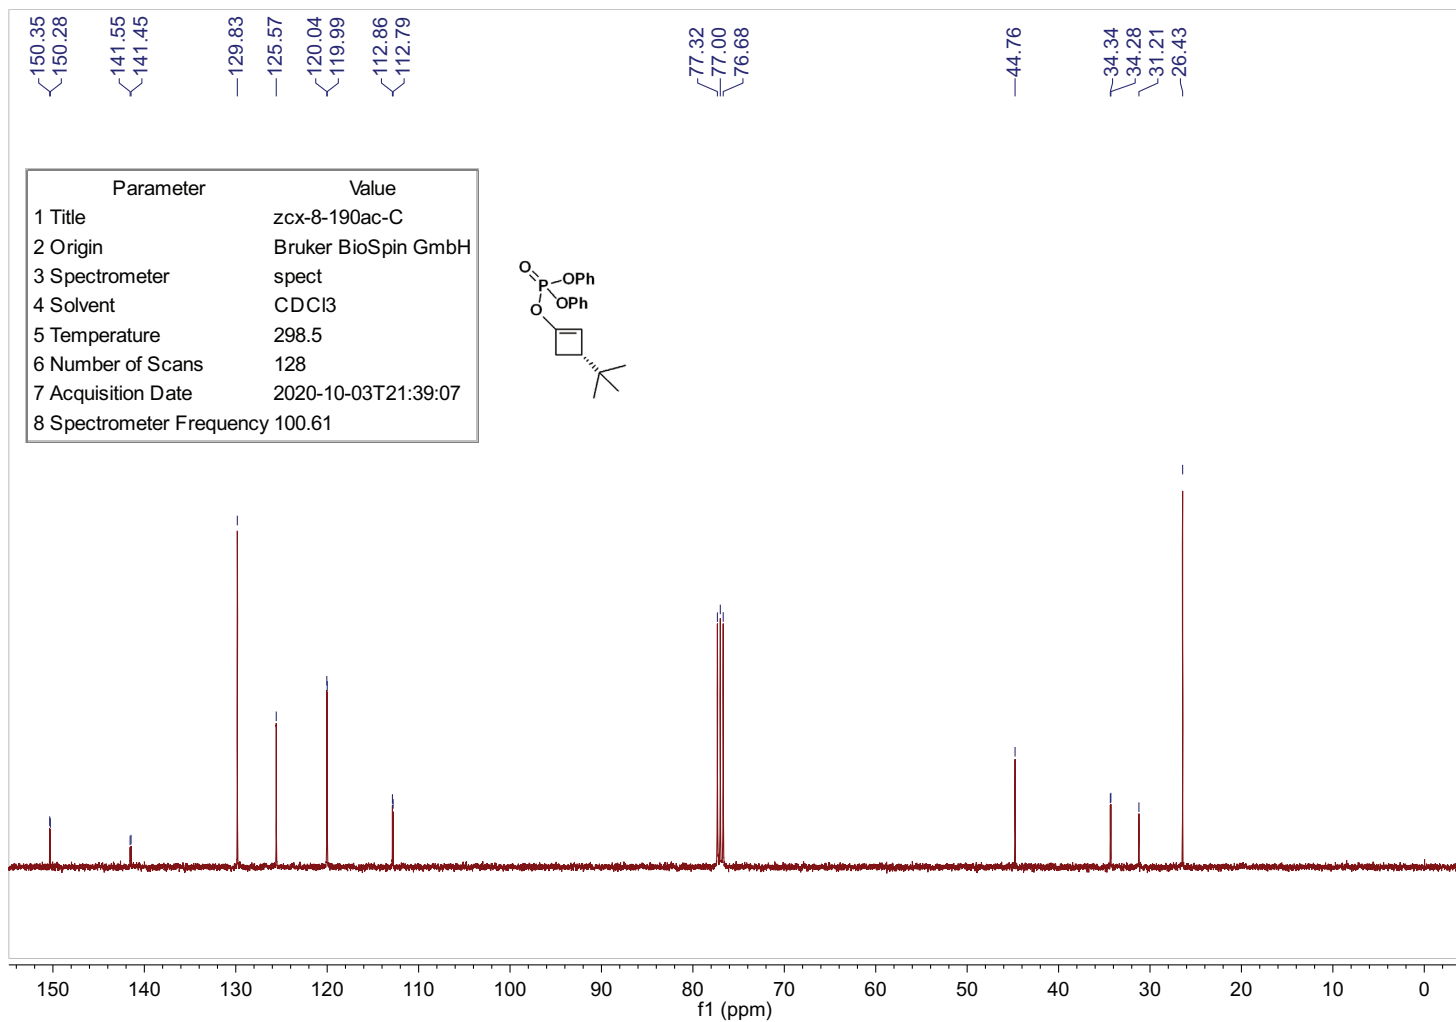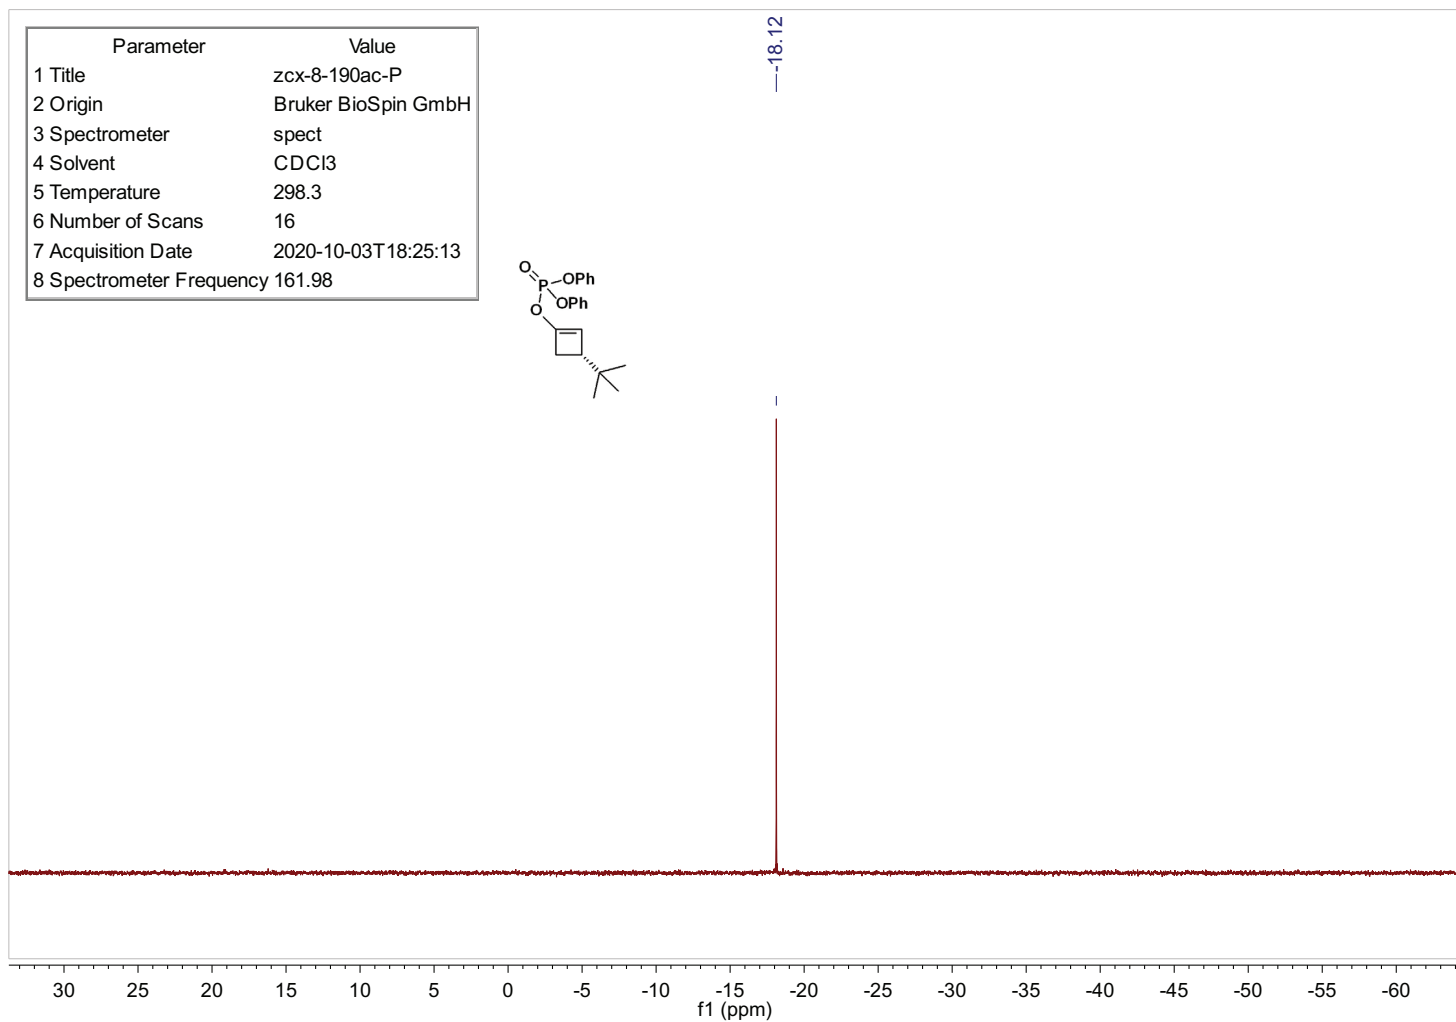

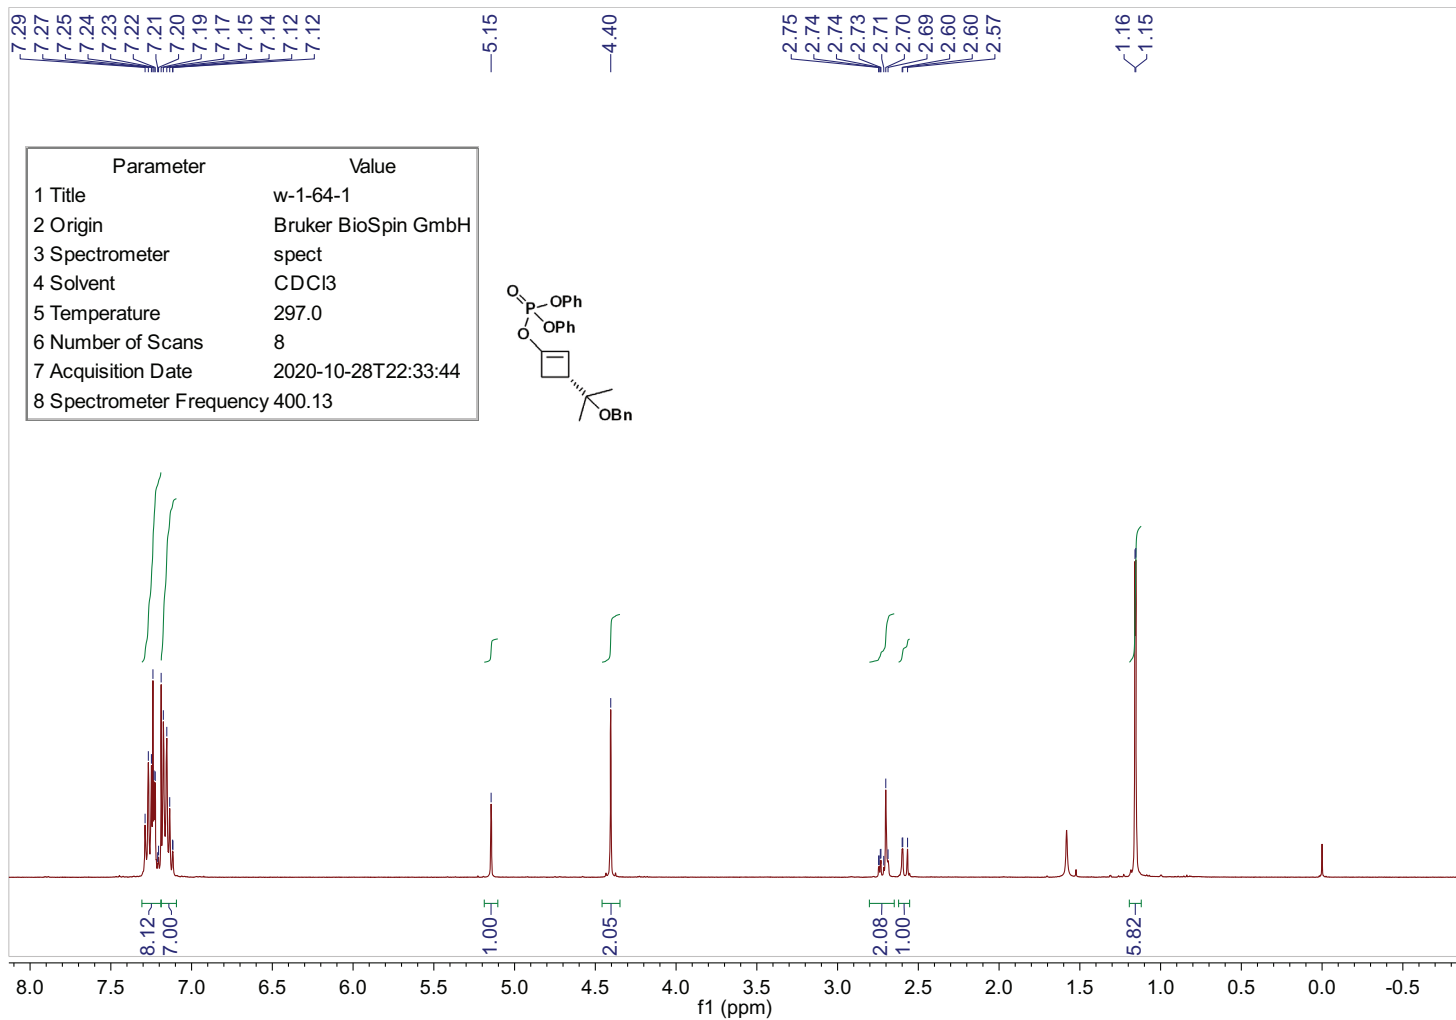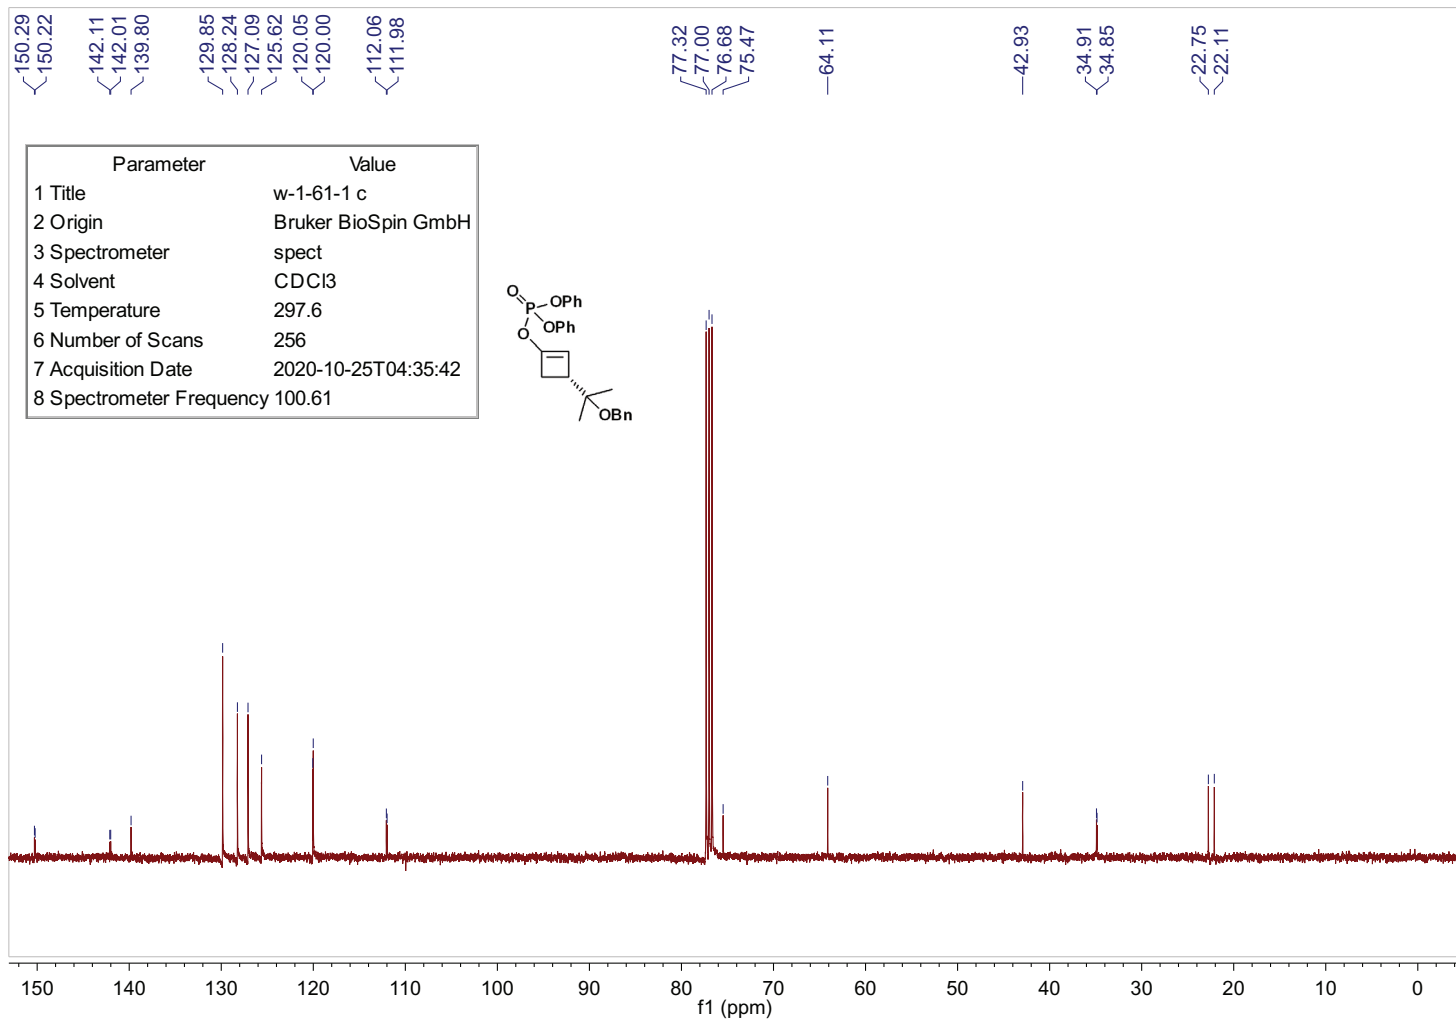



| Parameter                | Value               |
|--------------------------|---------------------|
| 1 Title                  | w-1-61-1 p          |
| 2 Origin                 | Bruker BioSpin GmbH |
| 3 Spectrometer           | spect               |
| 4 Solvent                | CDCl3               |
| 5 Temperature            | 297.3               |
| 6 Number of Scans        | 16                  |
| 7 Acquisition Date       | 2020-10-24T03:24:06 |
| 8 Spectrometer Frequency | 161.98              |

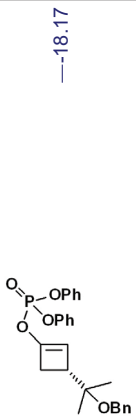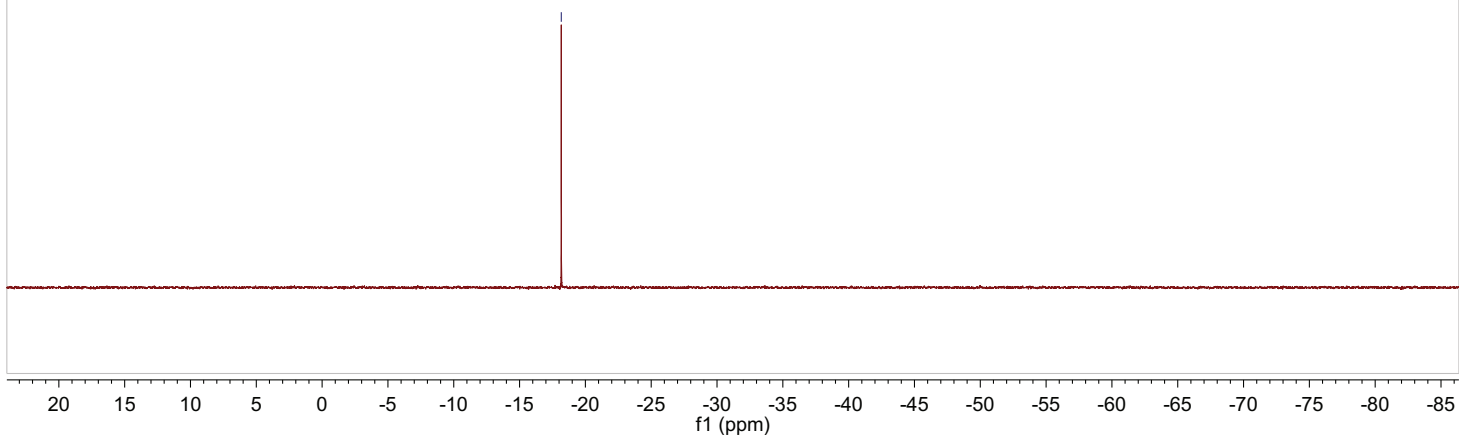

7.36  
7.34  
7.32  
7.24  
7.23  
7.21  
7.20  
7.18  
7.18  
6.83

5.22  
4.49  
3.53  
3.51  
3.51  
3.49  
3.45  
3.43  
3.43  
3.41  
2.91  
2.89  
2.88  
2.87  
2.38  
2.33  
2.24

| Parameter                | Value               |
|--------------------------|---------------------|
| 1 Title                  | W-1-53-1 H          |
| 2 Origin                 | Bruker BioSpin GmbH |
| 3 Spectrometer           | spect               |
| 4 Solvent                | CDCl3               |
| 5 Temperature            | 297.6               |
| 6 Number of Scans        | 4                   |
| 7 Acquisition Date       | 2020-10-08T08:49:10 |
| 8 Spectrometer Frequency | 400.13              |

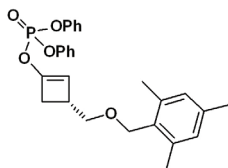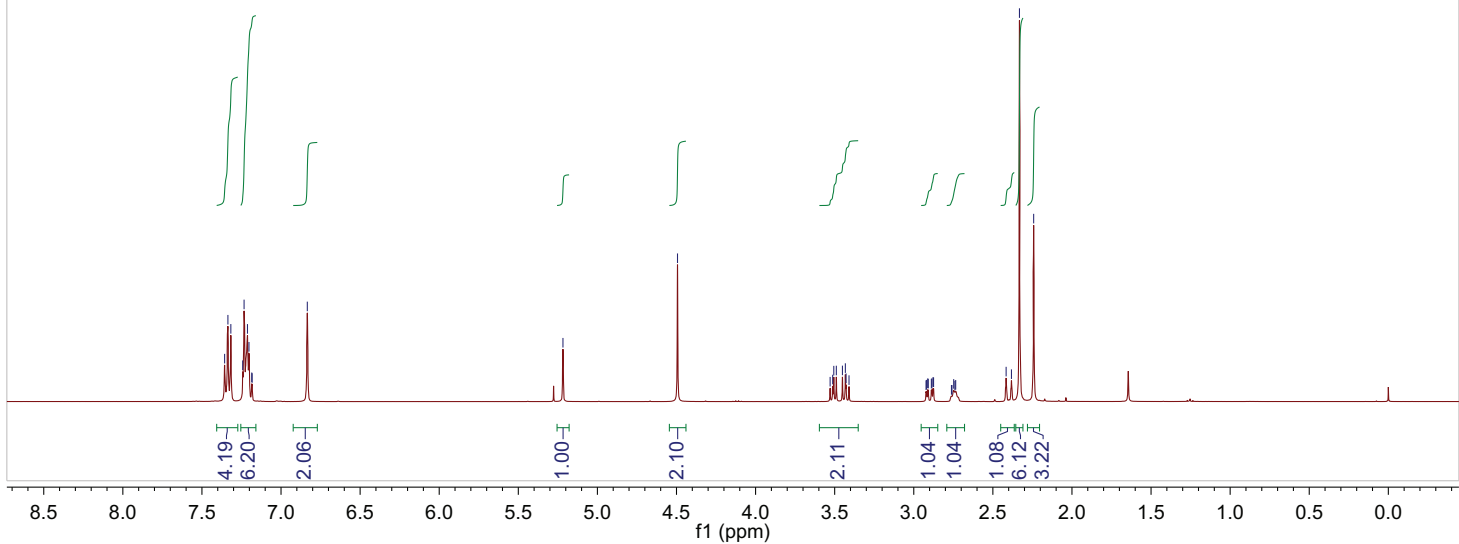

150.26  
150.19  
142.04  
141.95  
137.69  
137.54  
131.11  
129.83  
128.92  
125.63  
125.62  
120.05  
120.00  
112.42  
112.34

77.32  
77.00  
76.68  
73.42  
—67.13

36.99  
36.94  
33.57

20.92  
19.50

| Parameter                | Value               |
|--------------------------|---------------------|
| 1 Title                  | W-1-53-1 C          |
| 2 Origin                 | Bruker BioSpin GmbH |
| 3 Spectrometer           | spect               |
| 4 Solvent                | CDCl3               |
| 5 Temperature            | 298.1               |
| 6 Number of Scans        | 384                 |
| 7 Acquisition Date       | 2020-10-08T09:11:16 |
| 8 Spectrometer Frequency | 100.61              |

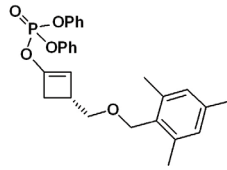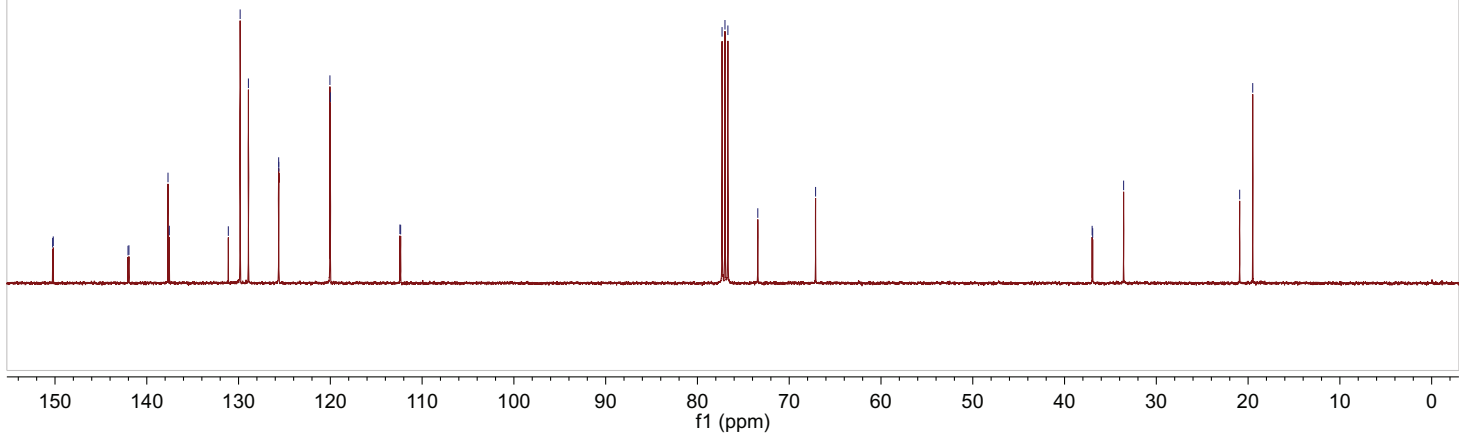

| Parameter                | Value               |
|--------------------------|---------------------|
| 1 Title                  | w-1-53-1 p          |
| 2 Origin                 | Bruker BioSpin GmbH |
| 3 Spectrometer           | spect               |
| 4 Solvent                | CDCl3               |
| 5 Temperature            | 297.7               |
| 6 Number of Scans        | 16                  |
| 7 Acquisition Date       | 2020-10-08T04:11:56 |
| 8 Spectrometer Frequency | 161.98              |

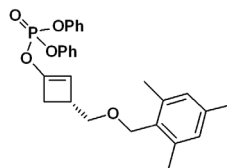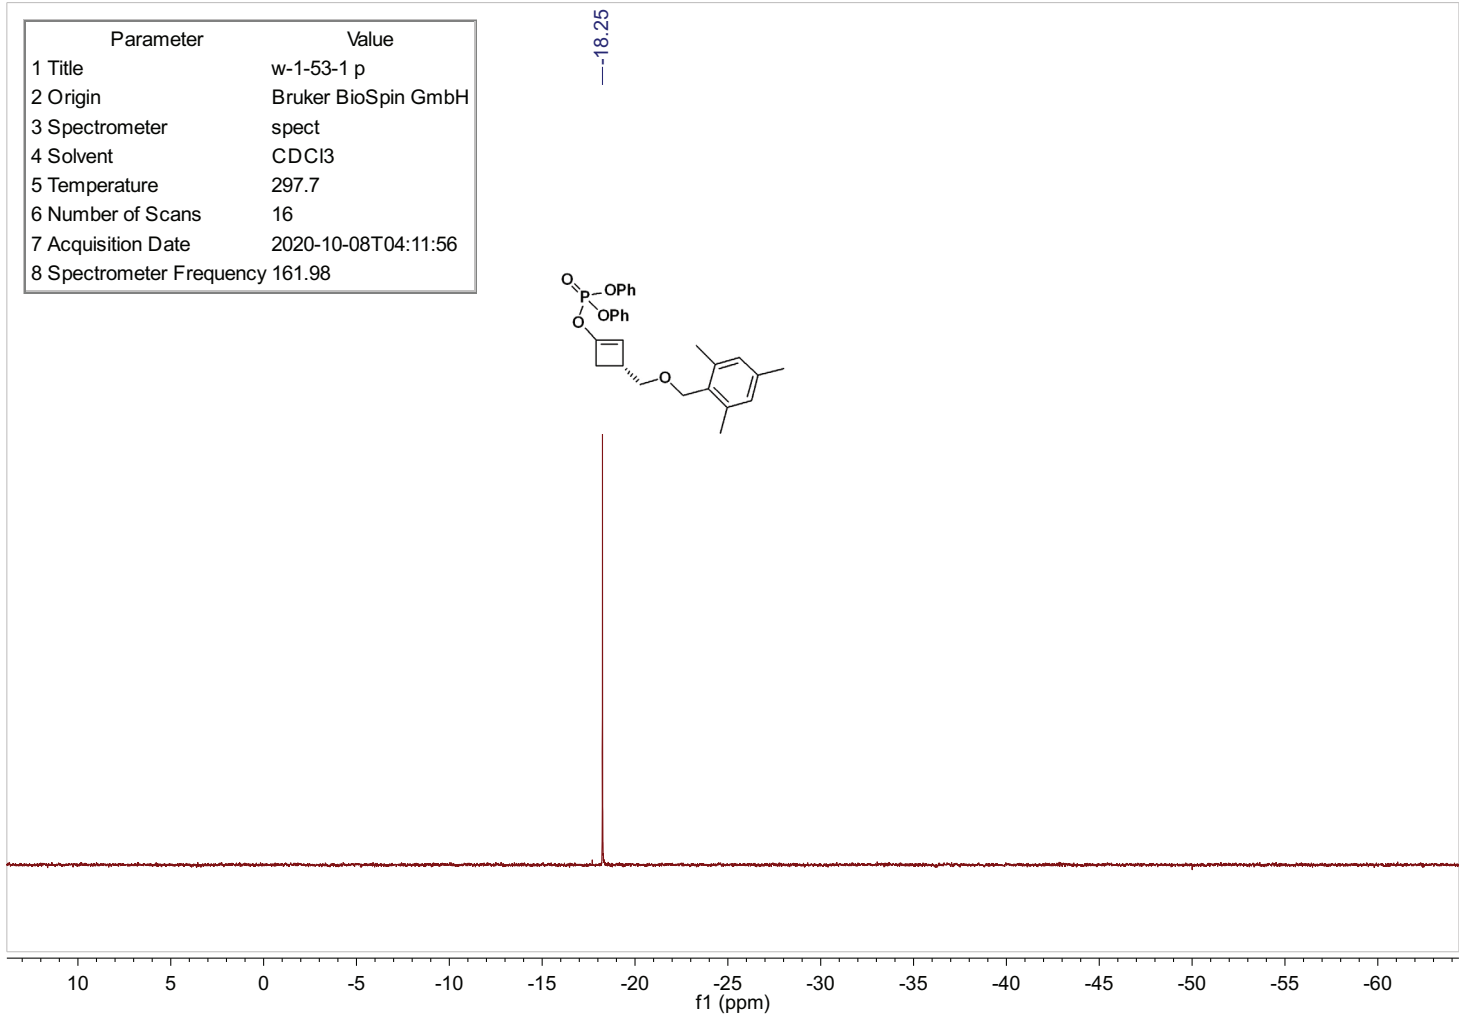

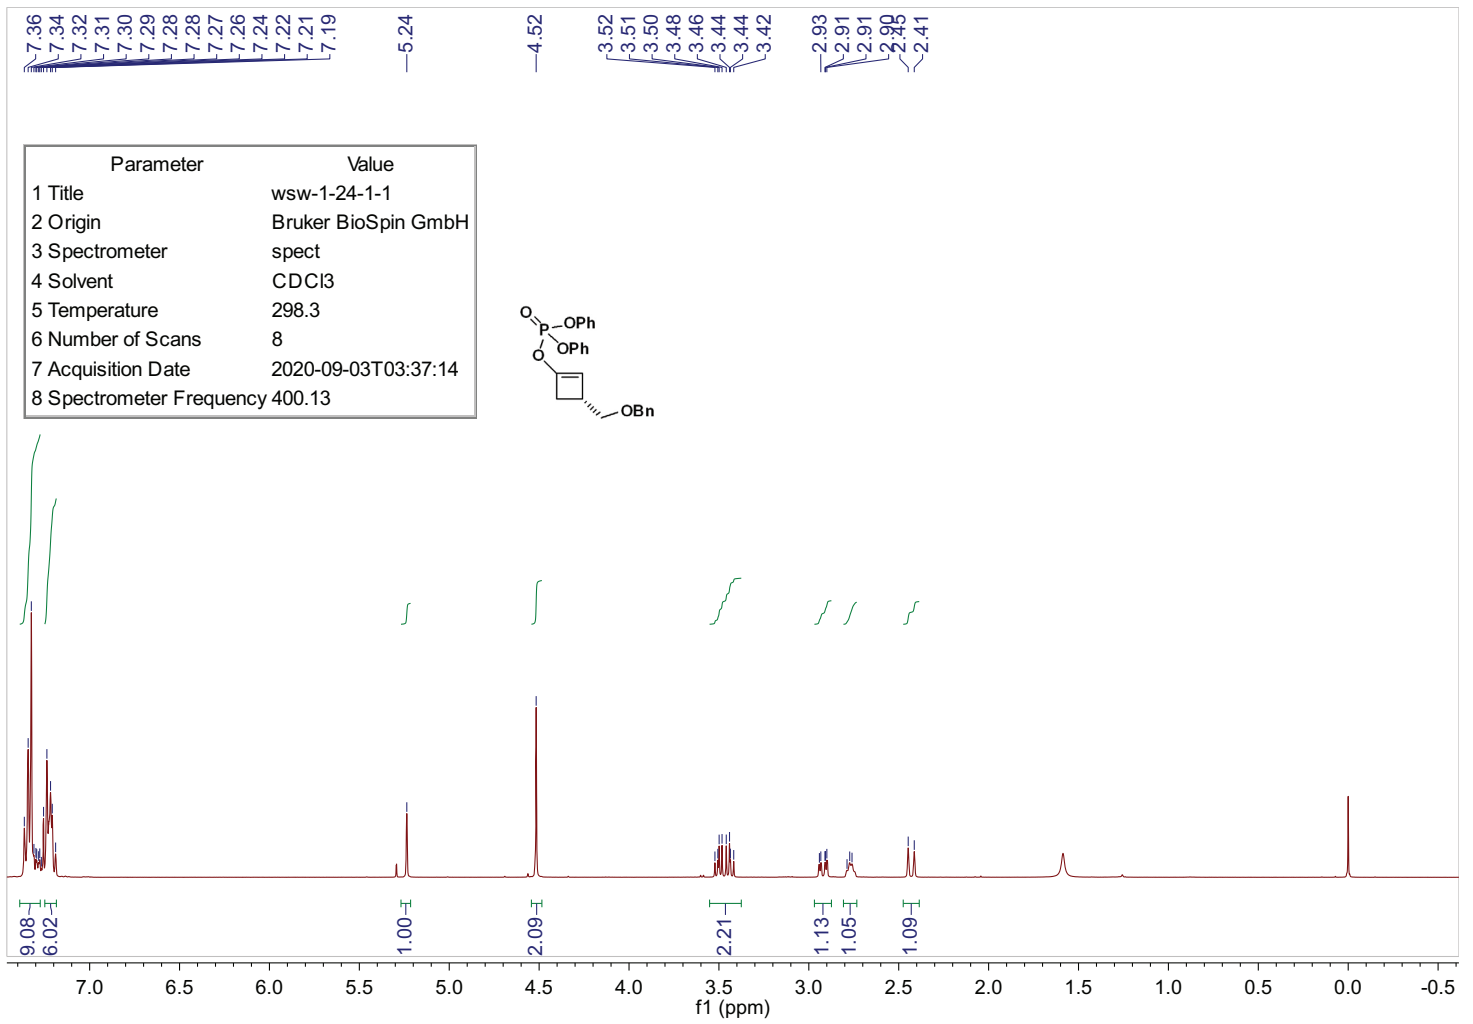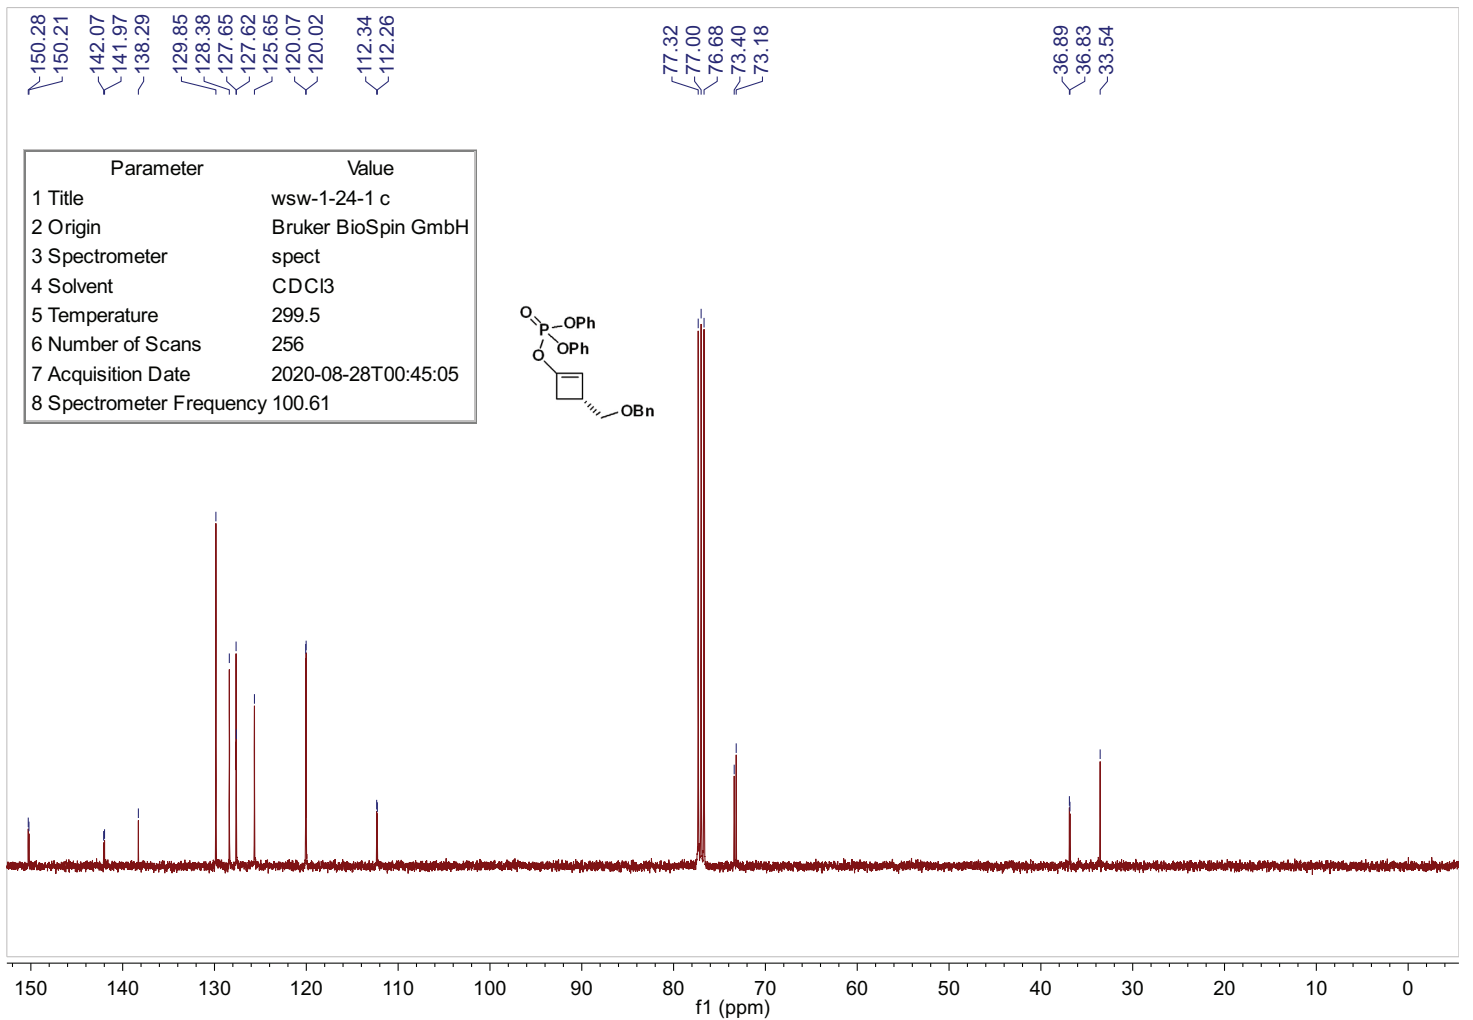

| Parameter                | Value               |
|--------------------------|---------------------|
| 1 Title                  | wsw-1-24-1-1 p      |
| 2 Origin                 | Bruker BioSpin GmbH |
| 3 Spectrometer           | spect               |
| 4 Solvent                | CDCl3               |
| 5 Temperature            | 298.6               |
| 6 Number of Scans        | 16                  |
| 7 Acquisition Date       | 2020-09-03T03:38:50 |
| 8 Spectrometer Frequency | 161.98              |

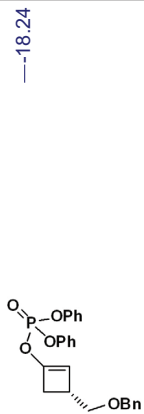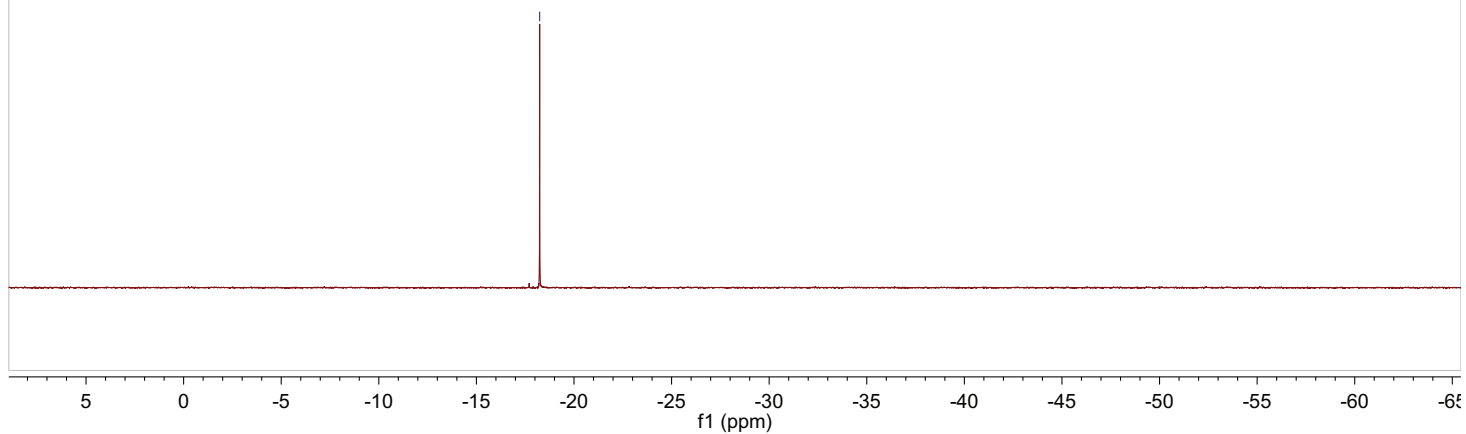

8.04  
8.02  
7.56  
7.55  
7.53  
7.43  
7.41  
7.39  
7.37  
7.35  
7.33  
7.26  
7.24  
7.22  
7.21  
7.19

5.27  
4.36  
4.34  
3.02  
3.01  
2.98  
2.97  
2.96  
2.94  
2.93  
2.60  
2.57

| Parameter                | Value               |
|--------------------------|---------------------|
| 1 Title                  | zcx-4-86ac2         |
| 2 Origin                 | Bruker BioSpin GmbH |
| 3 Spectrometer           | spect               |
| 4 Solvent                | CDCl3               |
| 5 Temperature            | 297.7               |
| 6 Experiment             | 1D                  |
| 7 Number of Scans        | 4                   |
| 8 Acquisition Date       | 2018-10-30T21:07:28 |
| 9 Spectrometer Frequency | 400.13              |

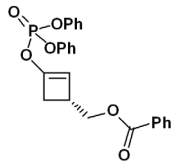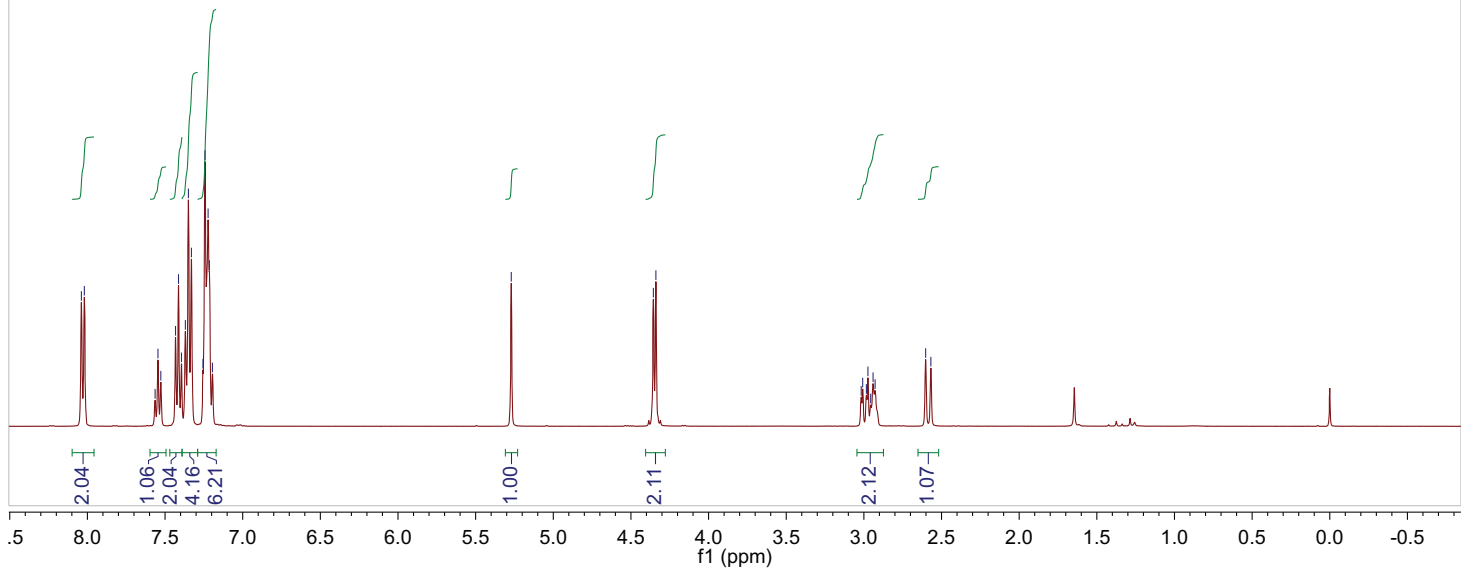

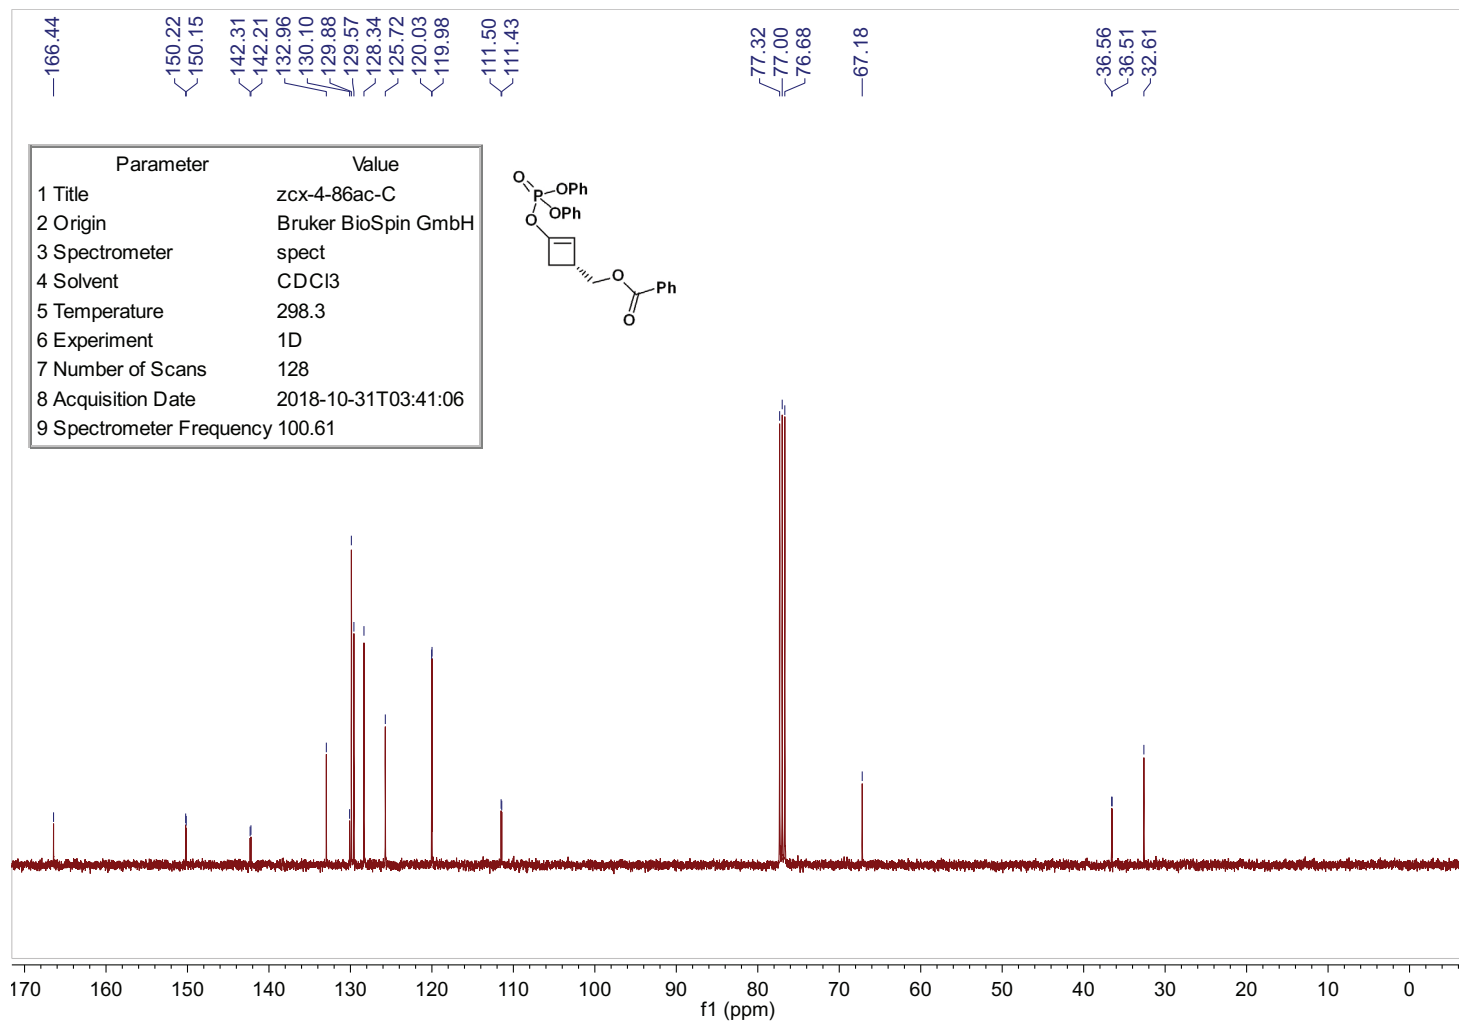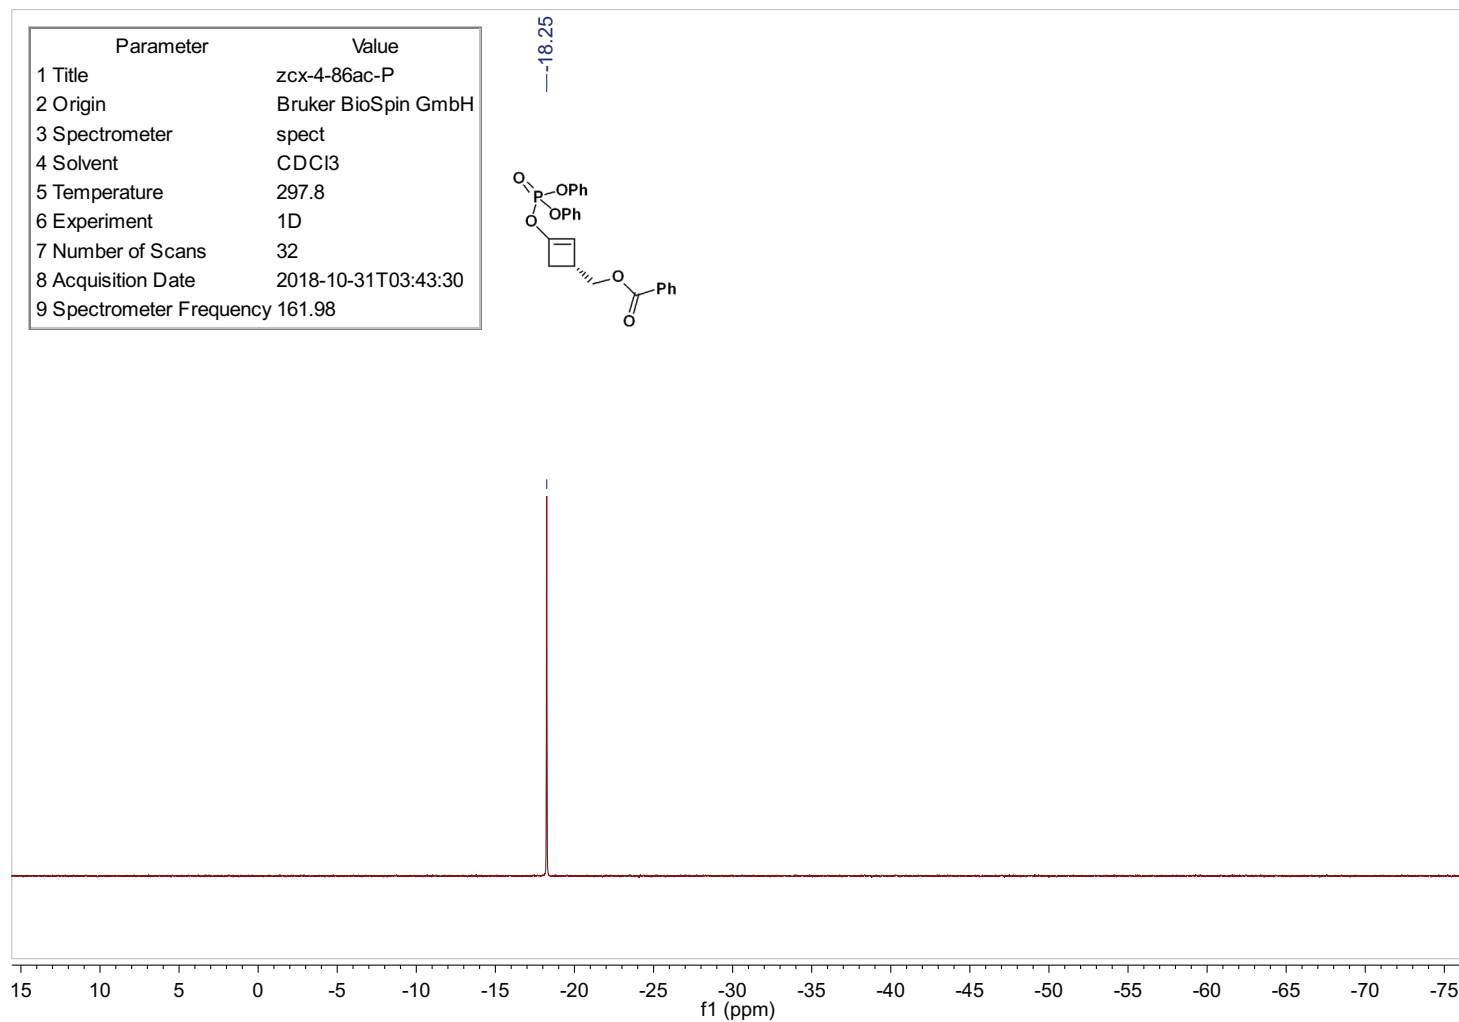

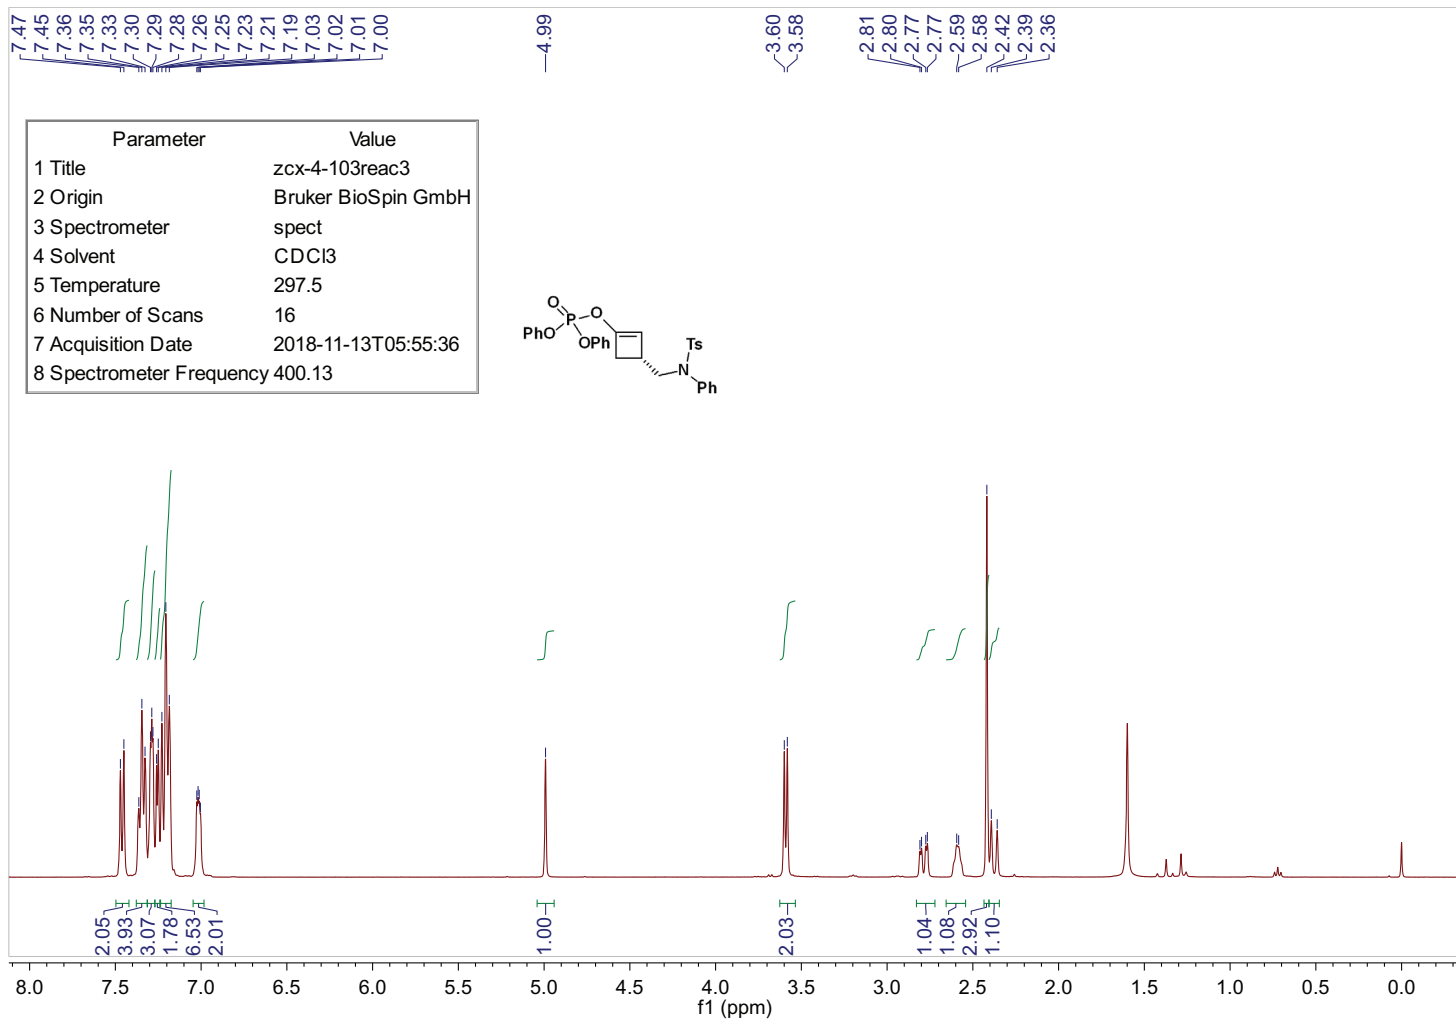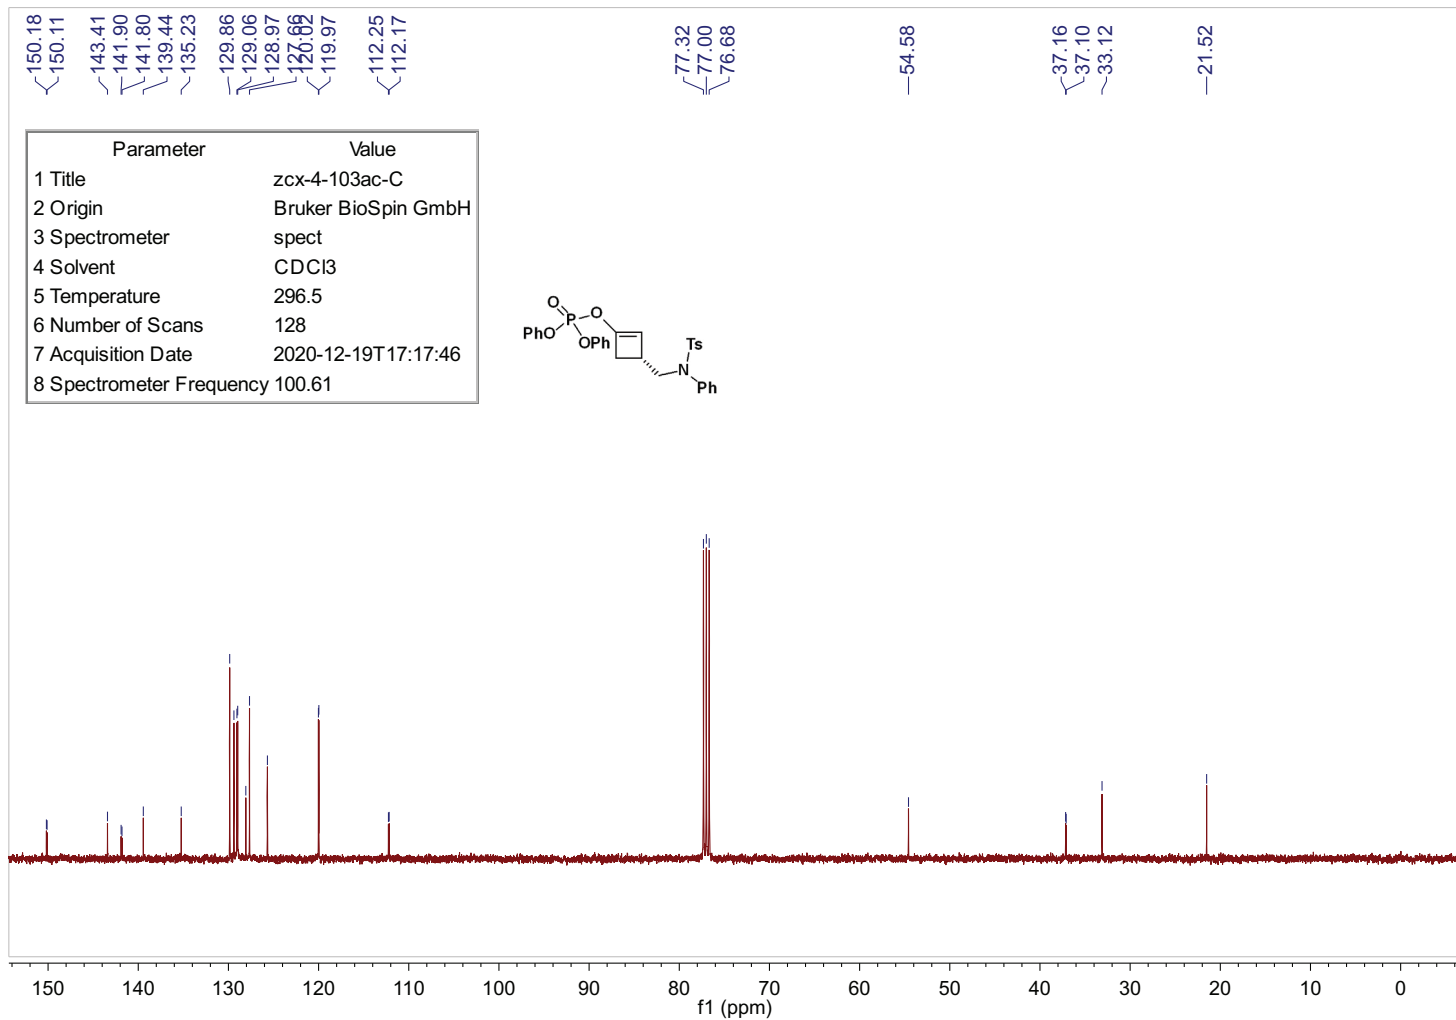

| Parameter                | Value               |
|--------------------------|---------------------|
| 1 Title                  | zcx-4-103ac-P       |
| 2 Origin                 | Bruker BioSpin GmbH |
| 3 Spectrometer           | spect               |
| 4 Solvent                | CDCl3               |
| 5 Temperature            | 296.2               |
| 6 Number of Scans        | 16                  |
| 7 Acquisition Date       | 2020-12-19T17:19:37 |
| 8 Spectrometer Frequency | 161.98              |

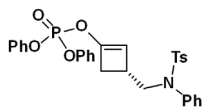

-18.32

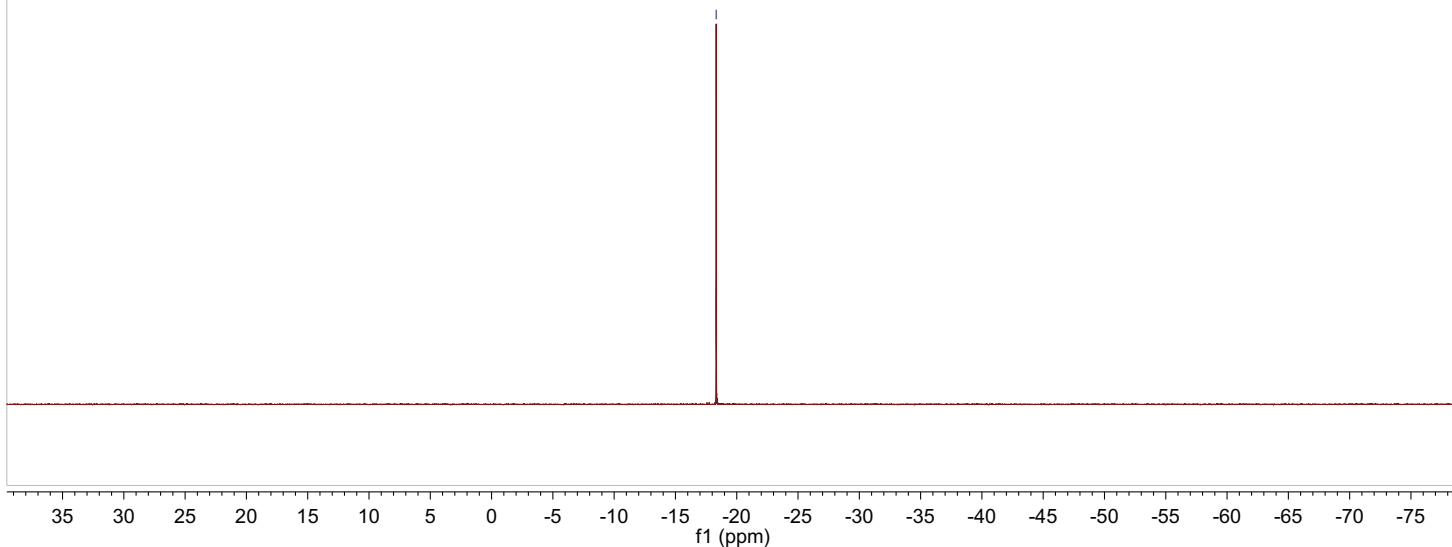

7.37  
7.35  
7.34  
7.27  
7.25  
7.23  
7.21  
7.19

-5.47

3.80  
3.79  
3.77  
3.75  
3.74

3.30  
3.28  
3.26  
3.19  
2.65  
2.62

1.45  
1.41  
1.40  
1.38  
1.19  
1.18  
1.17  
1.16

| Parameter                | Value               |
|--------------------------|---------------------|
| 1 Title                  | zcx-4-97ac          |
| 2 Origin                 | Bruker BioSpin GmbH |
| 3 Spectrometer           | spect               |
| 4 Solvent                | CDCl3               |
| 5 Temperature            | 297.7               |
| 6 Number of Scans        | 4                   |
| 7 Acquisition Date       | 2018-11-09T05:22:02 |
| 8 Spectrometer Frequency | 400.13              |

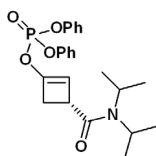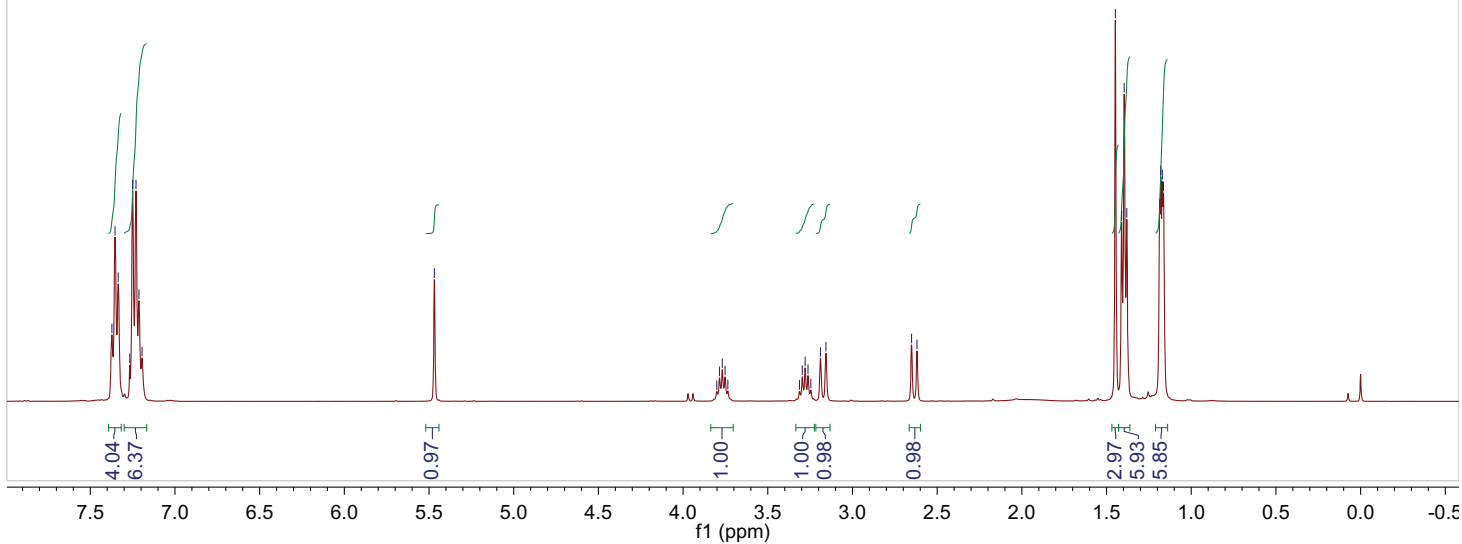

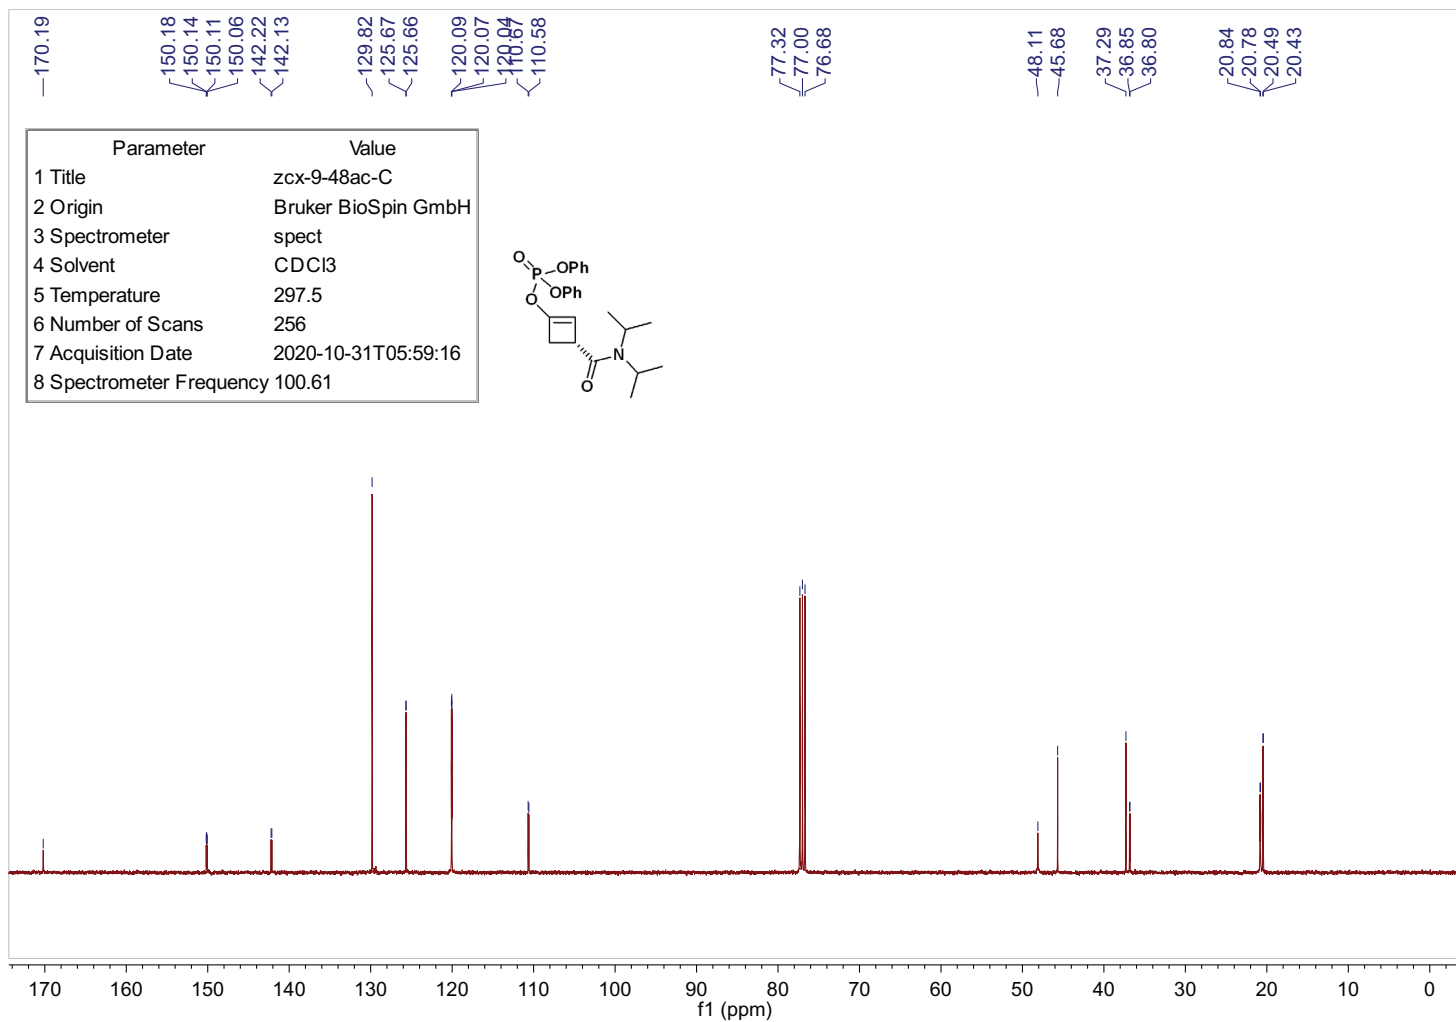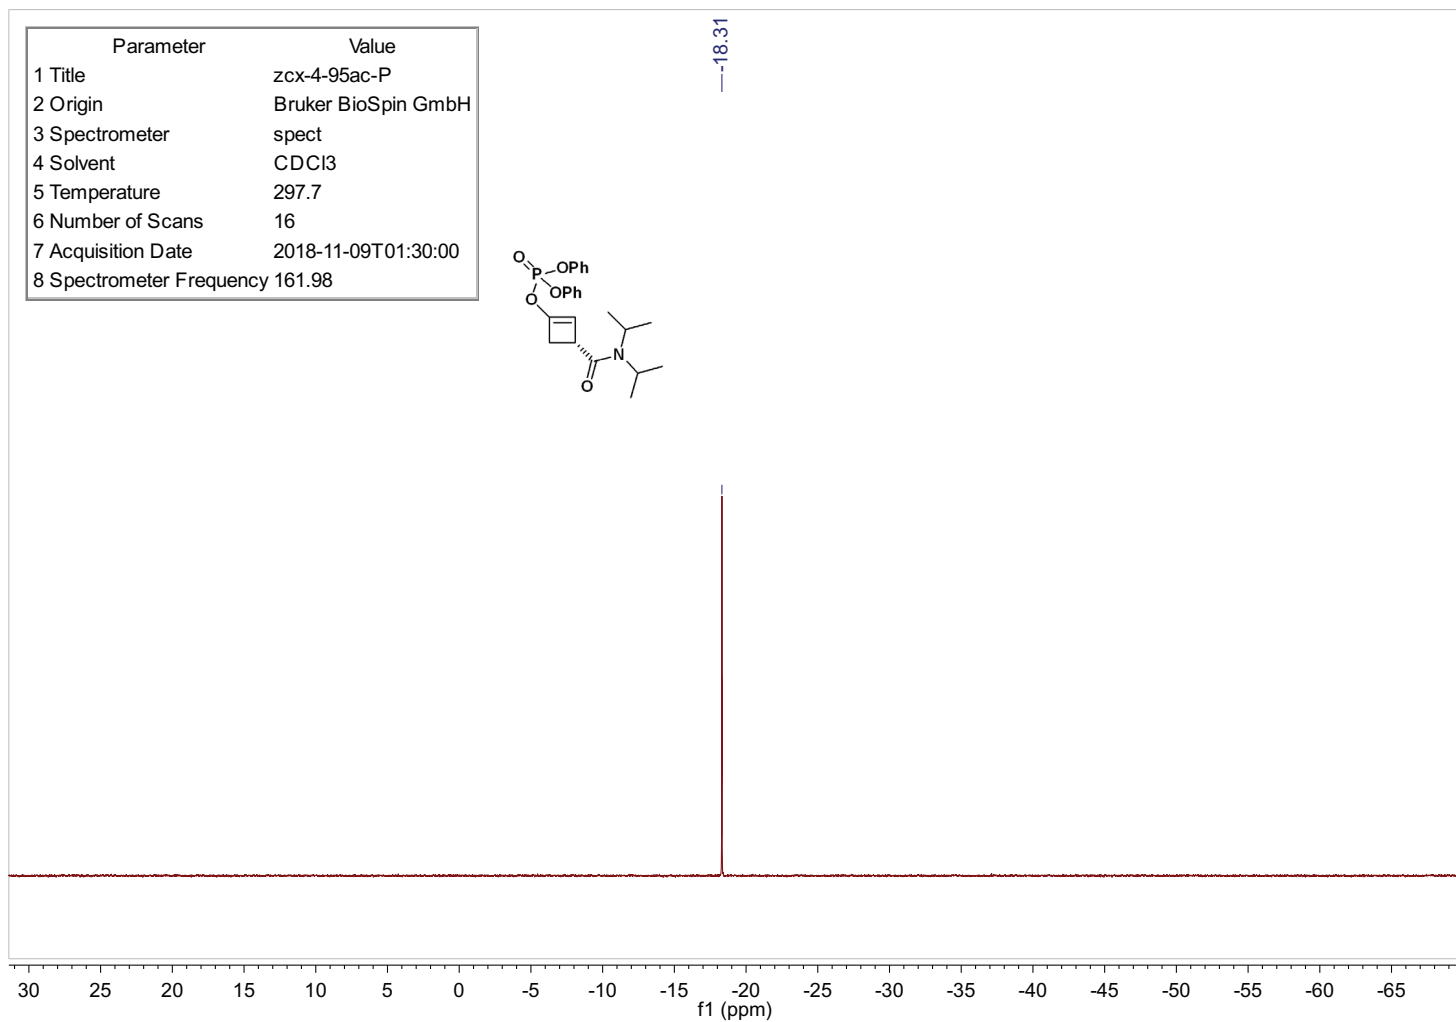



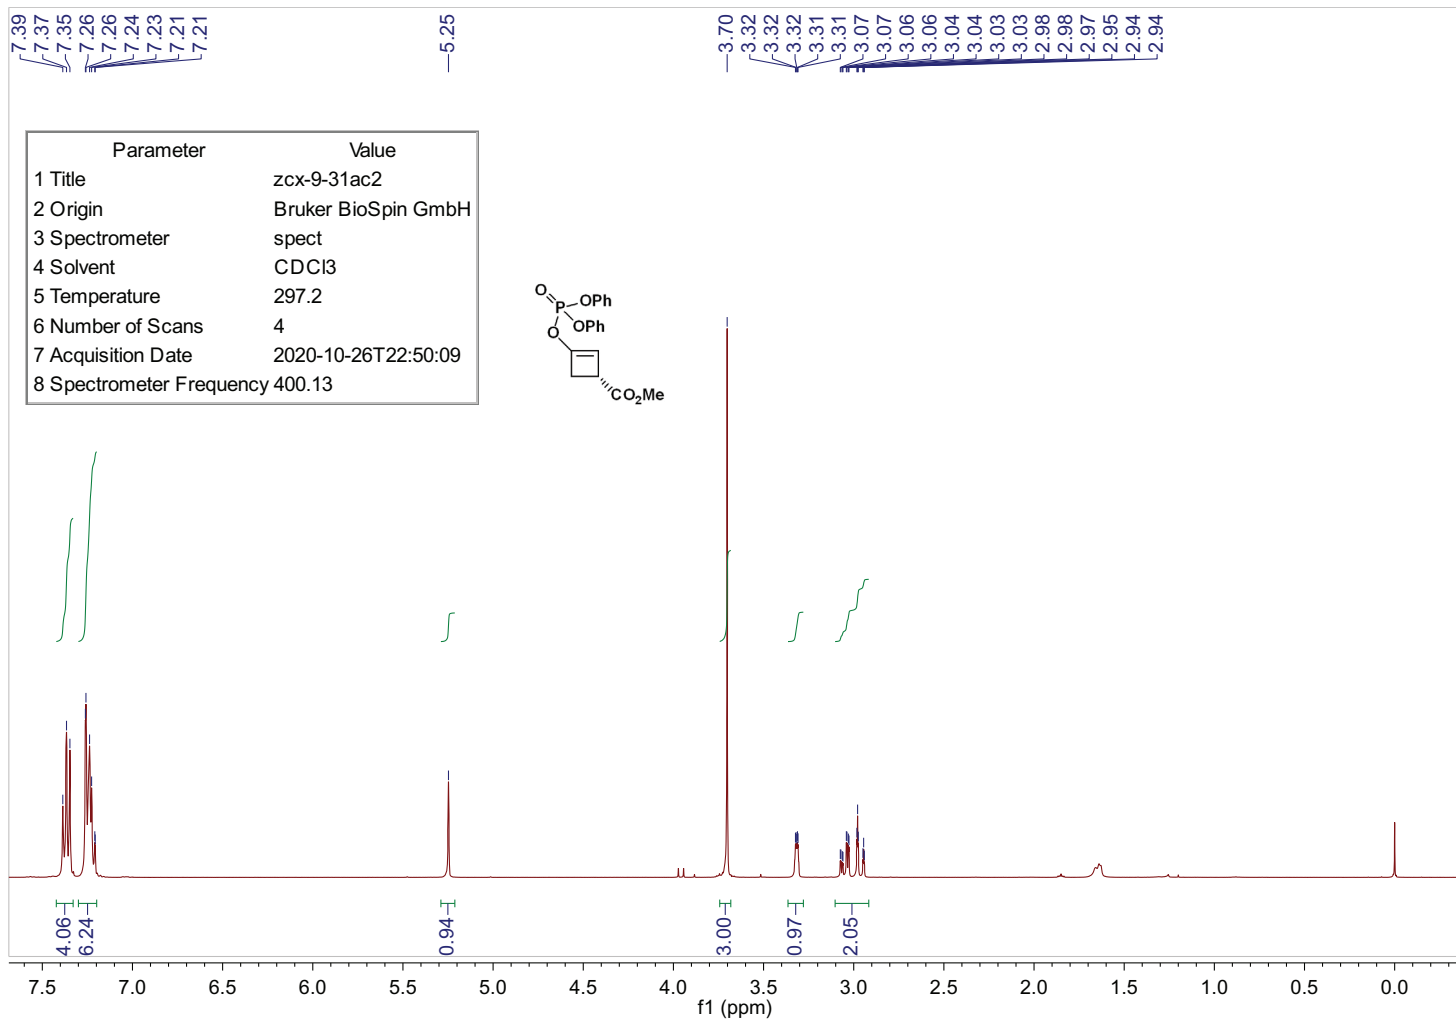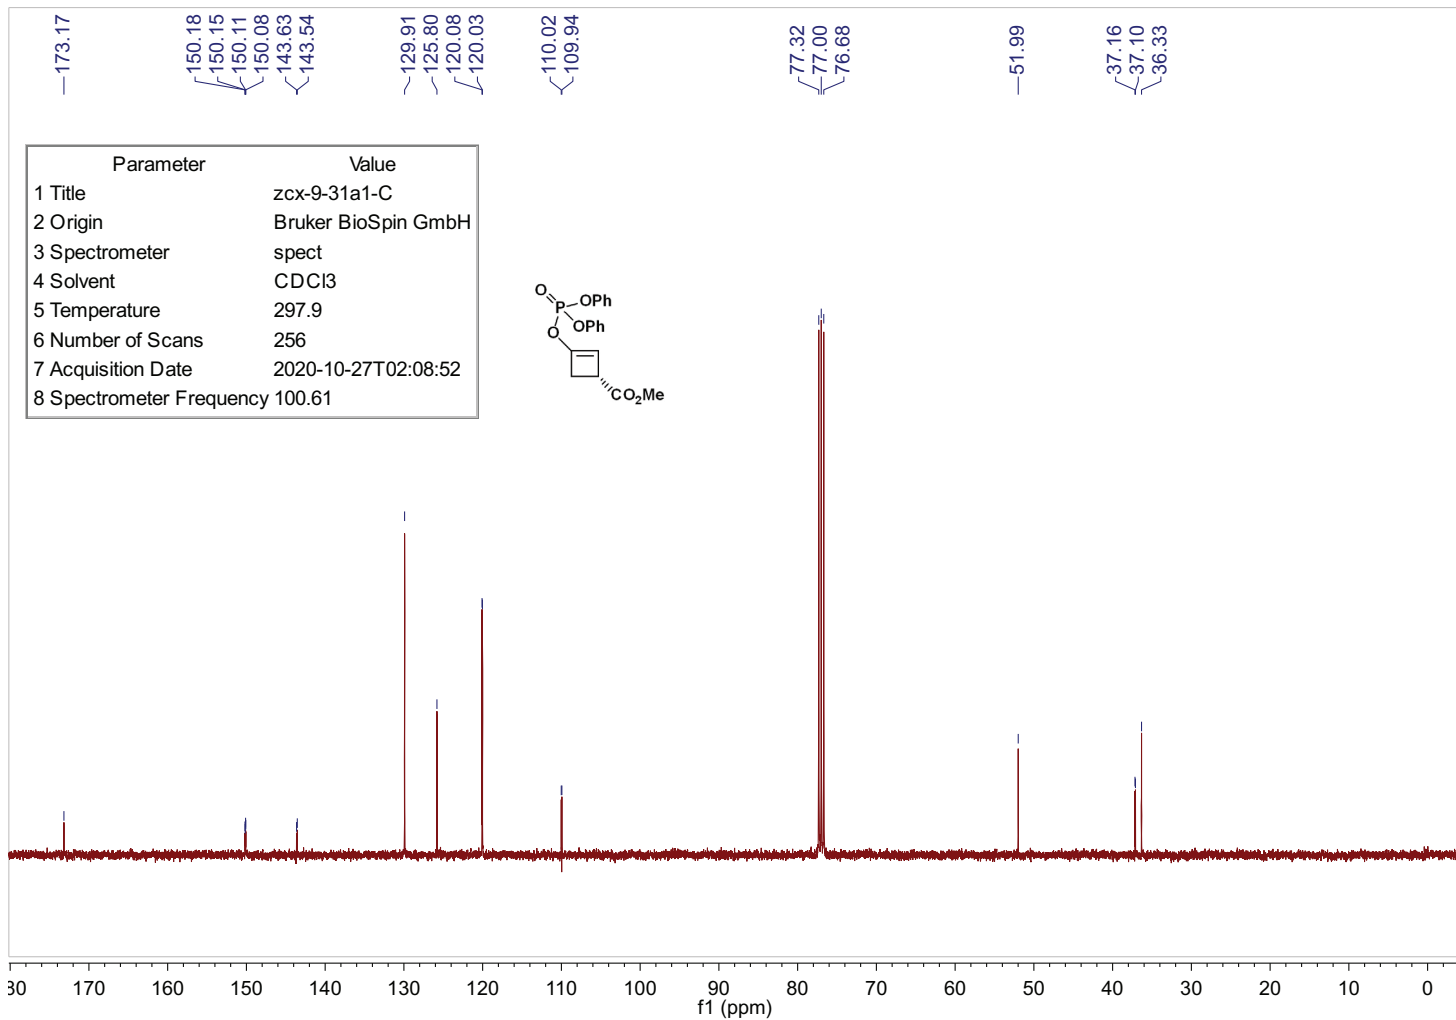

| Parameter                | Value               |
|--------------------------|---------------------|
| 1 Title                  | zcx-9-31ac1-P       |
| 2 Origin                 | Bruker BioSpin GmbH |
| 3 Spectrometer           | spect               |
| 4 Solvent                | CDCl3               |
| 5 Temperature            | 297.5               |
| 6 Number of Scans        | 16                  |
| 7 Acquisition Date       | 2020-10-26T22:46:42 |
| 8 Spectrometer Frequency | 161.98              |

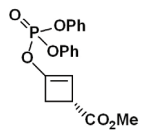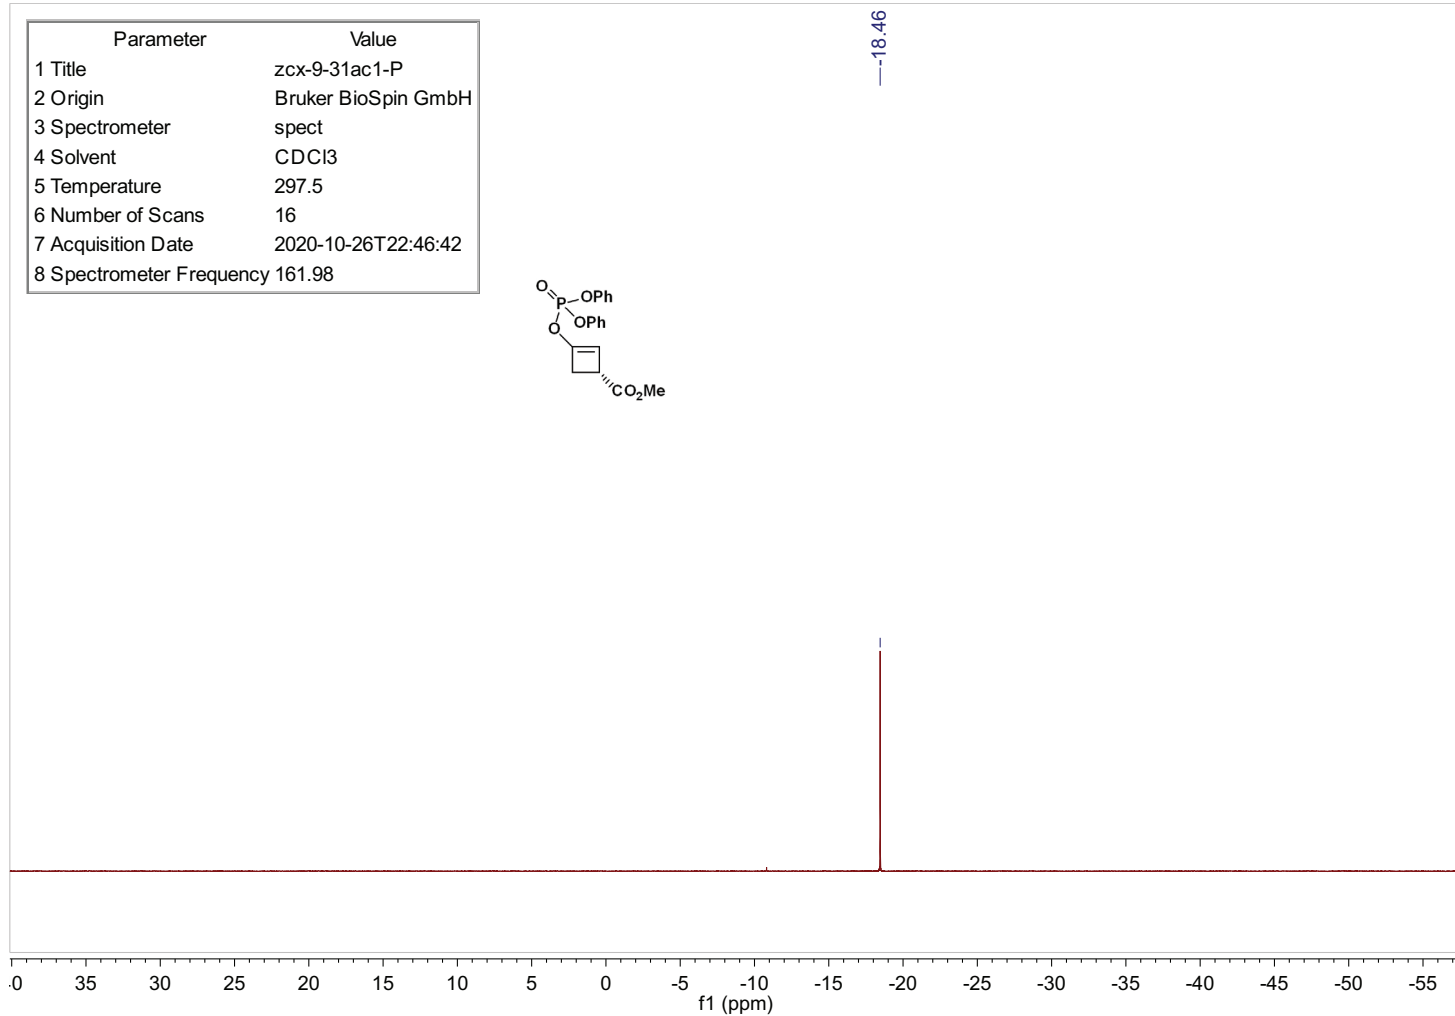

7.37  
7.37  
7.35  
7.33  
7.33  
7.25  
7.23  
7.21  
7.19

-5.47

3.80  
3.78  
3.77  
3.75  
3.73  
3.28  
3.26  
3.19  
2.65  
2.62  
2.62

1.45  
1.41  
1.40  
1.38  
1.18  
1.18  
1.17  
1.16

| Parameter                | Value               |
|--------------------------|---------------------|
| 1 Title                  | zcx-9-90ac1         |
| 2 Origin                 | Bruker BioSpin GmbH |
| 3 Spectrometer           | spect               |
| 4 Solvent                | CDCl3               |
| 5 Temperature            | 296.2               |
| 6 Number of Scans        | 4                   |
| 7 Acquisition Date       | 2020-11-25T01:44:12 |
| 8 Spectrometer Frequency | 400.13              |

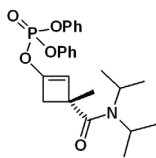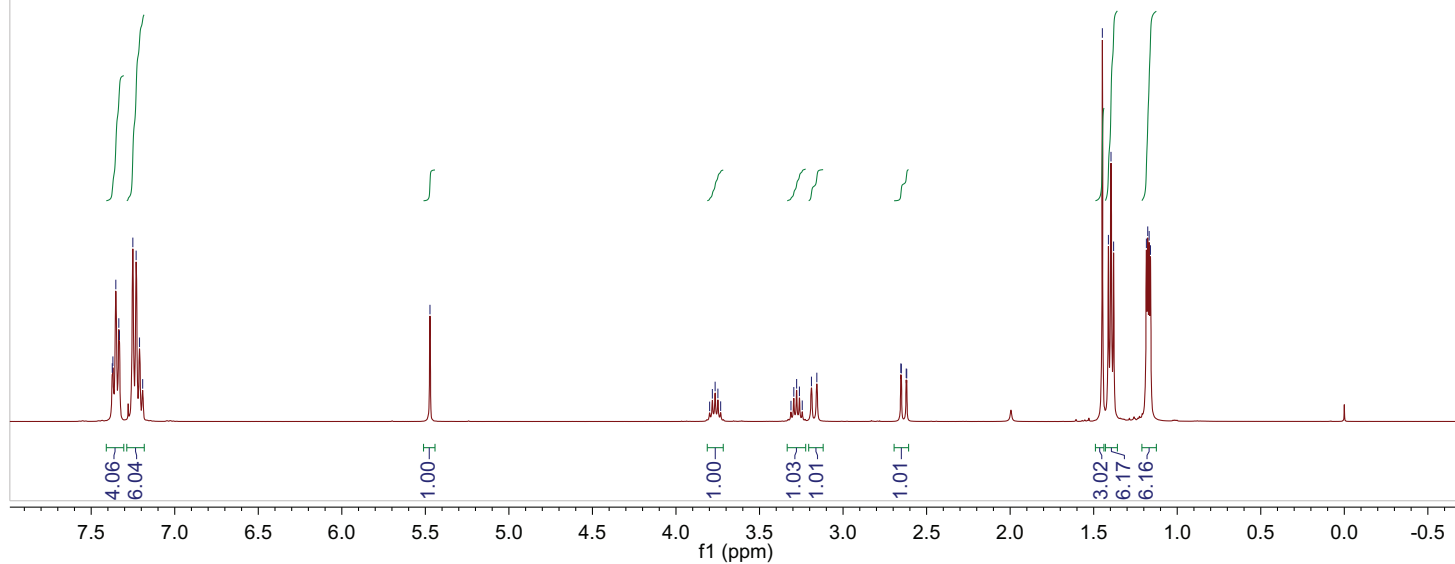

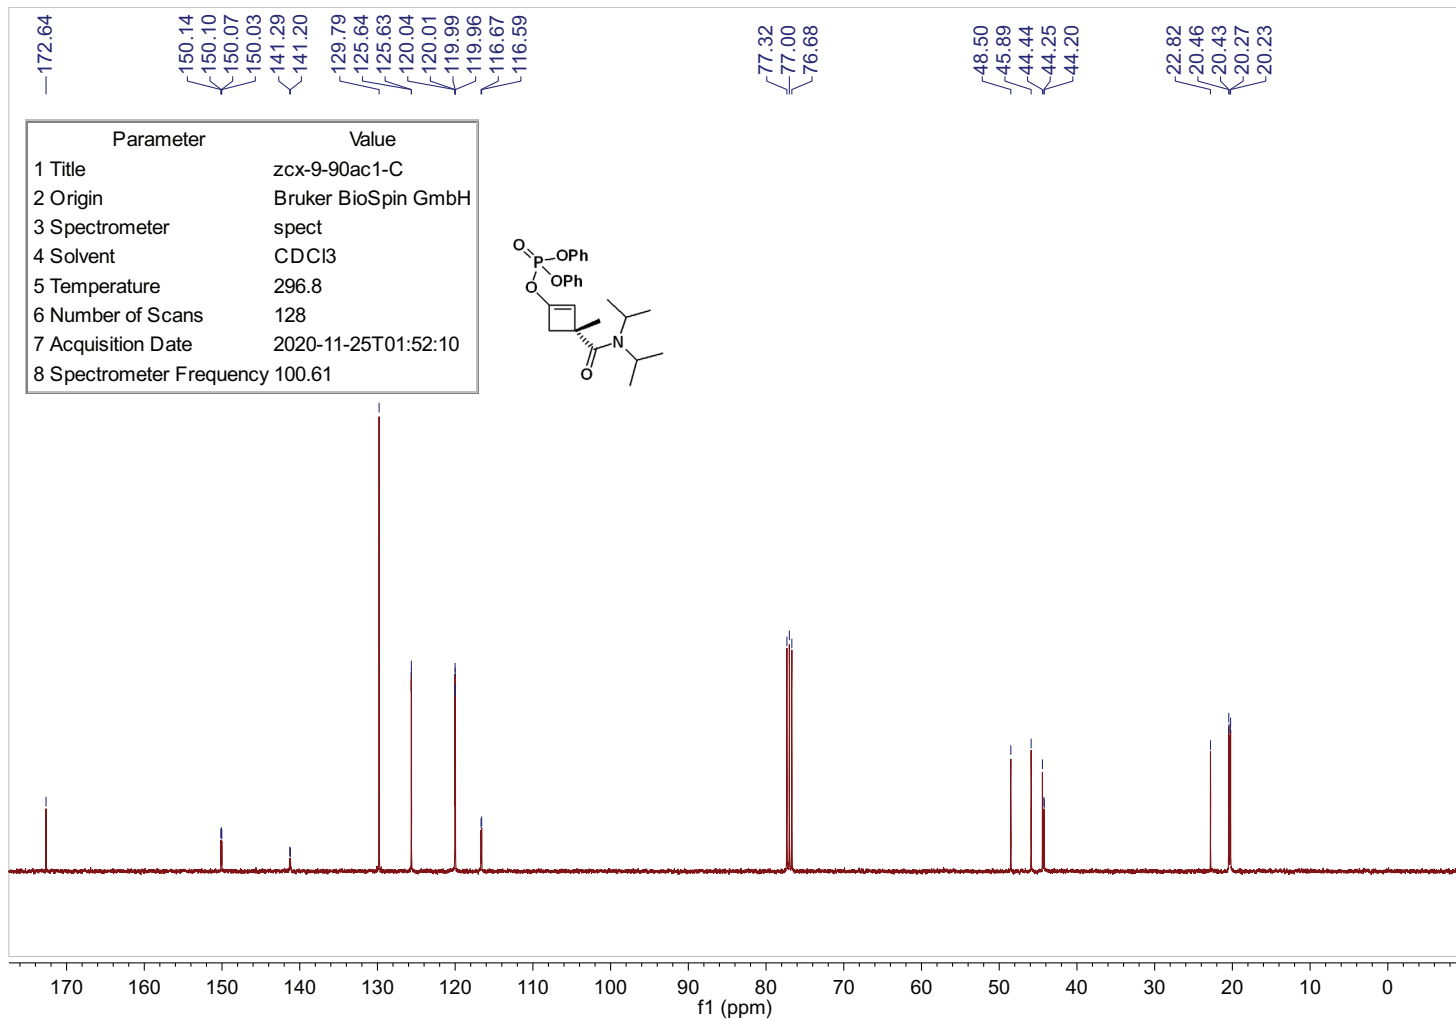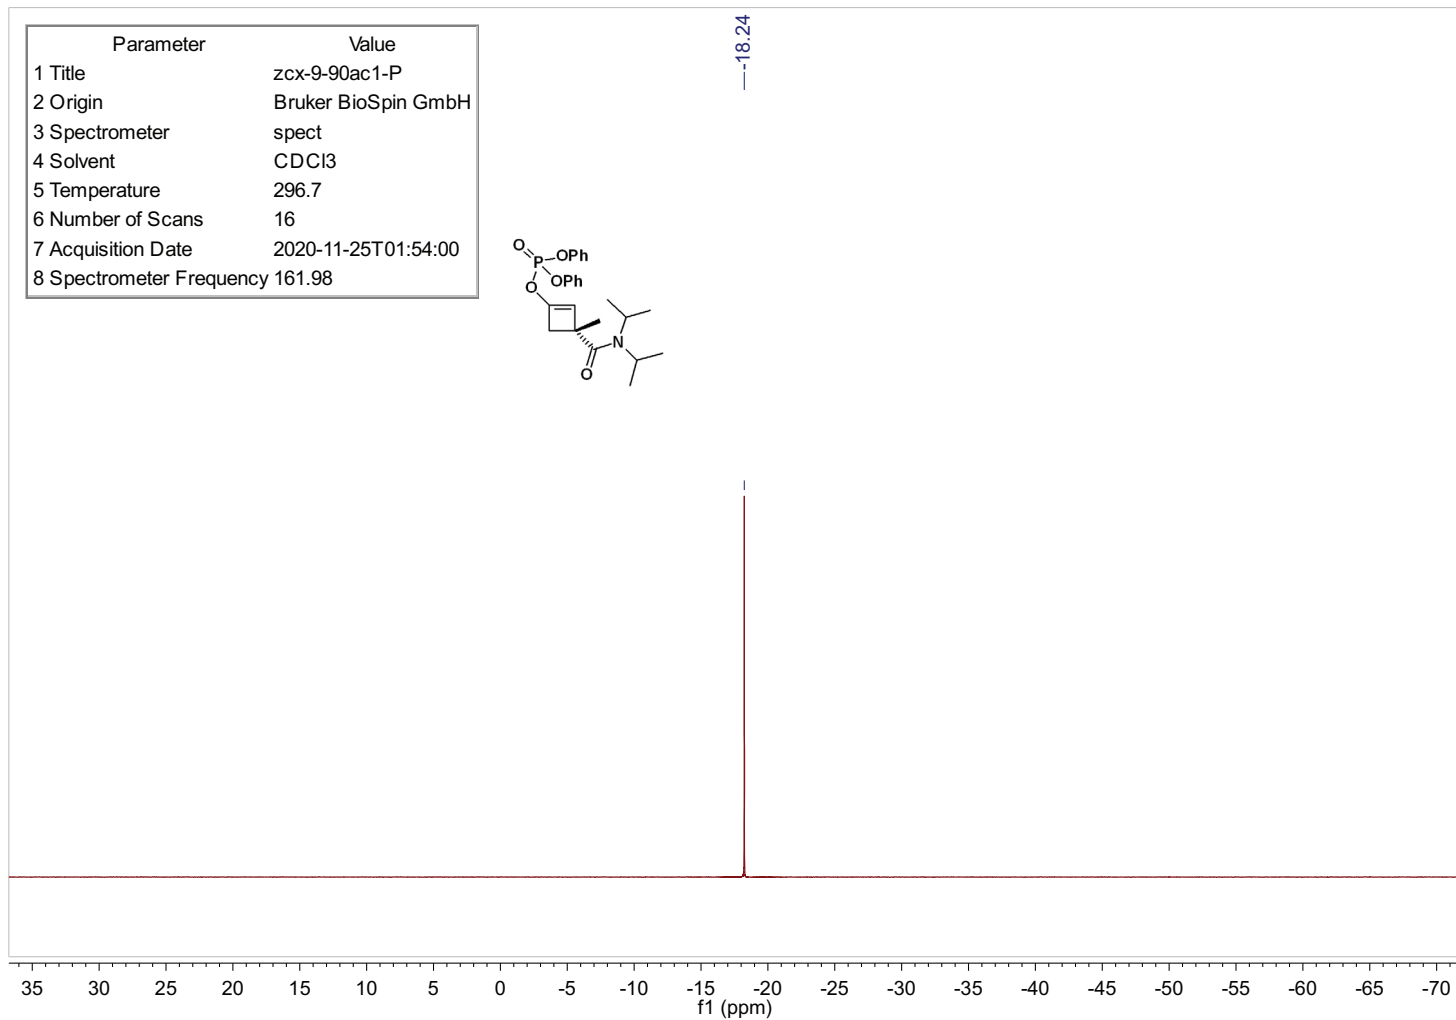

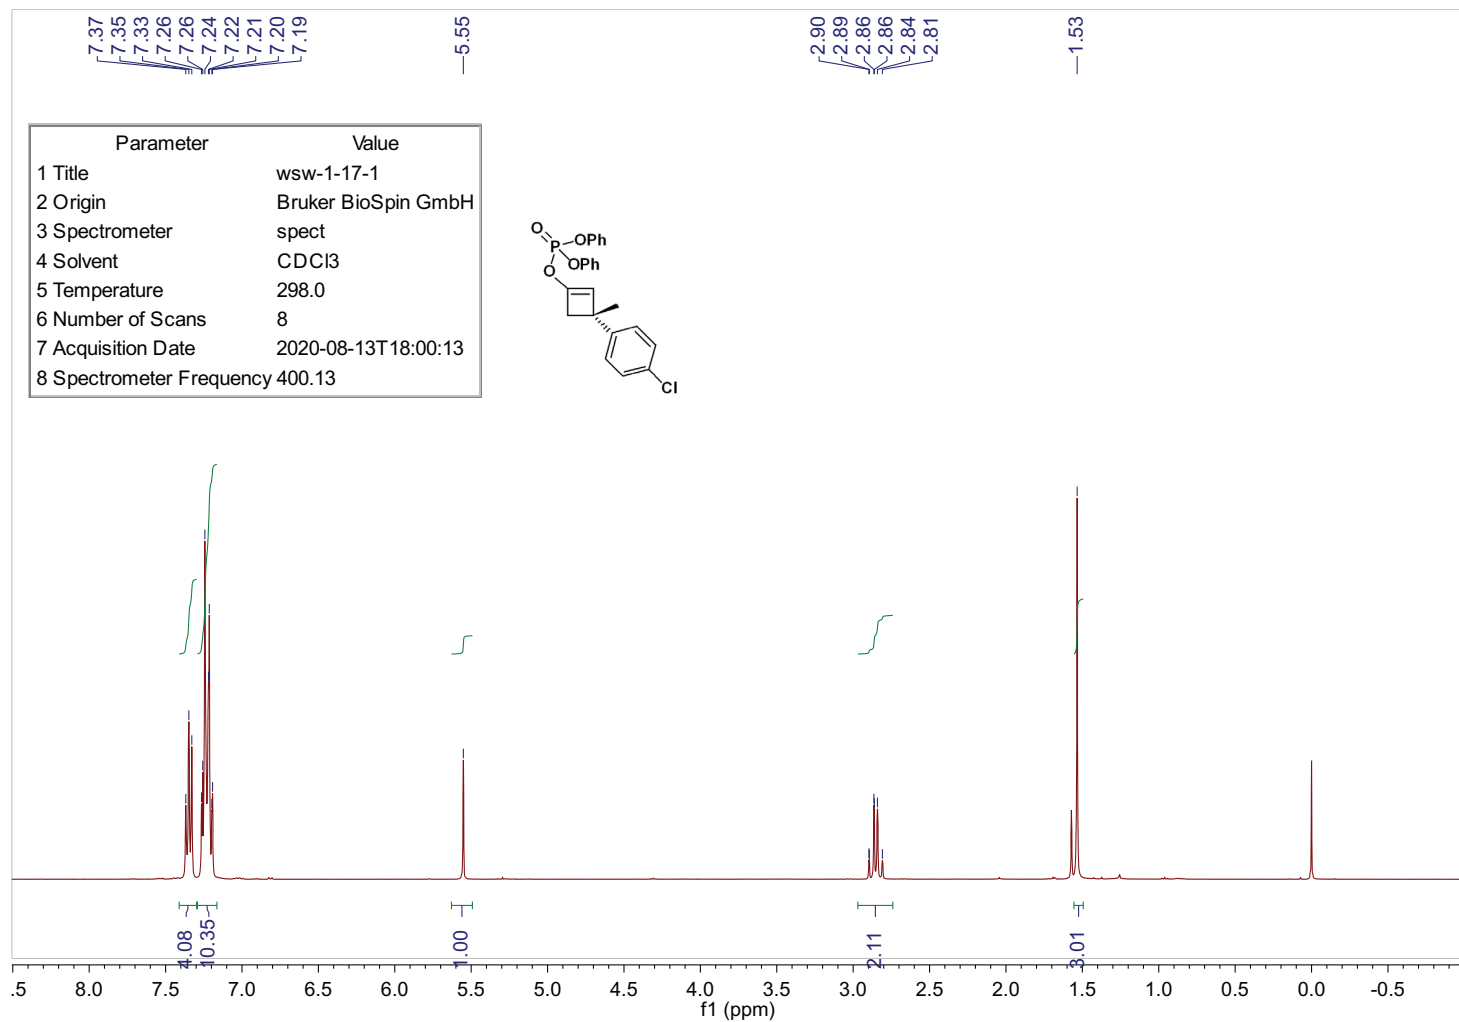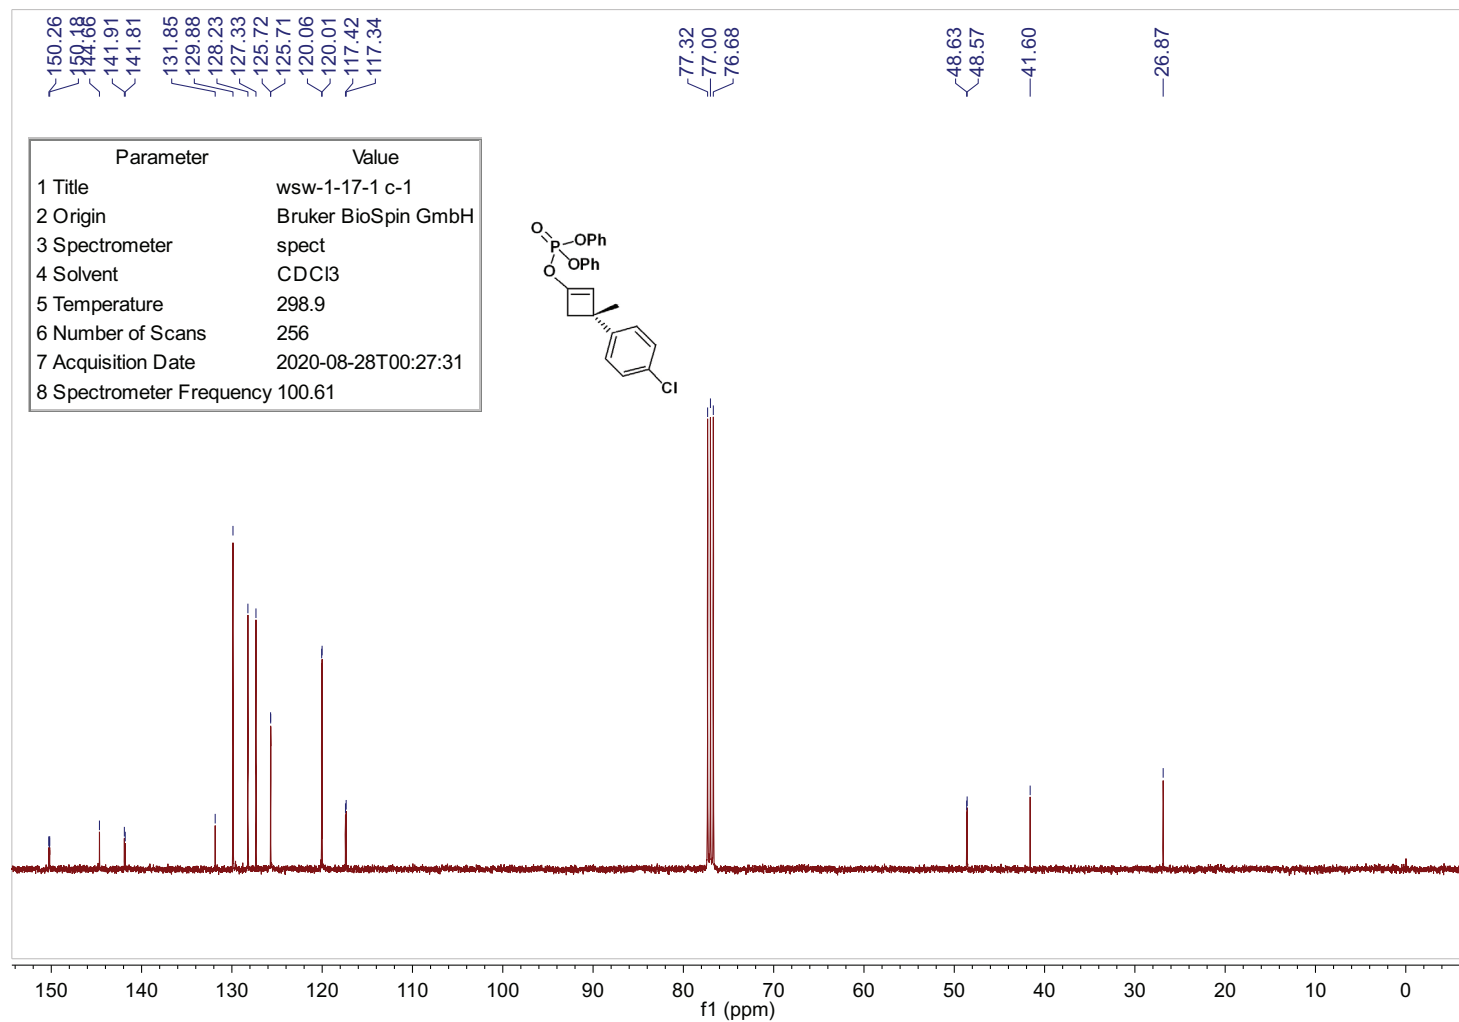

| Parameter                | Value               |
|--------------------------|---------------------|
| 1 Title                  | wsw-1-17-1 p        |
| 2 Origin                 | Bruker BioSpin GmbH |
| 3 Spectrometer           | spect               |
| 4 Solvent                | CDCl3               |
| 5 Temperature            | 298.3               |
| 6 Number of Scans        | 16                  |
| 7 Acquisition Date       | 2020-08-13T18:10:01 |
| 8 Spectrometer Frequency | 161.98              |

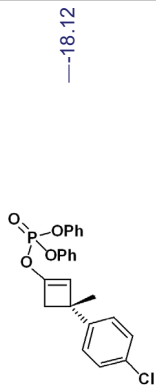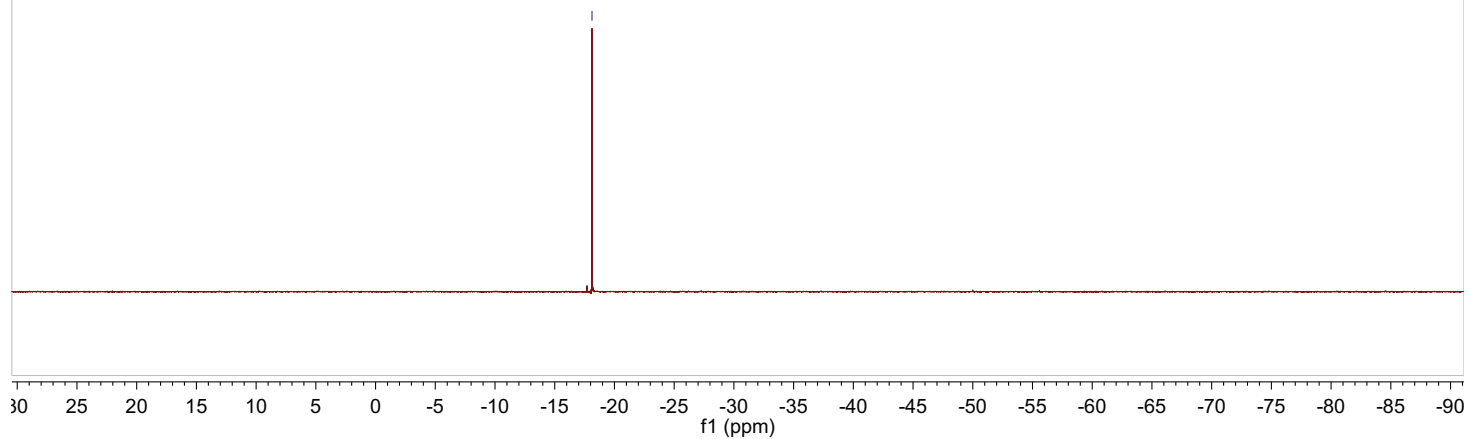

7.37  
7.35  
7.31  
7.31  
7.30  
7.30  
7.29  
7.29  
6.68  
6.64  
6.57  
6.56  
6.53  
6.52

5.26  
5.25  
5.25  
4.95  
4.94

| Parameter                | Value               |
|--------------------------|---------------------|
| 1 Title                  | zcx-9-102ac         |
| 2 Origin                 | Bruker BioSpin GmbH |
| 3 Spectrometer           | spect               |
| 4 Solvent                | CDCl3               |
| 5 Temperature            | 296.3               |
| 6 Number of Scans        | 4                   |
| 7 Acquisition Date       | 2020-12-01T12:49:45 |
| 8 Spectrometer Frequency | 400.13              |

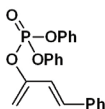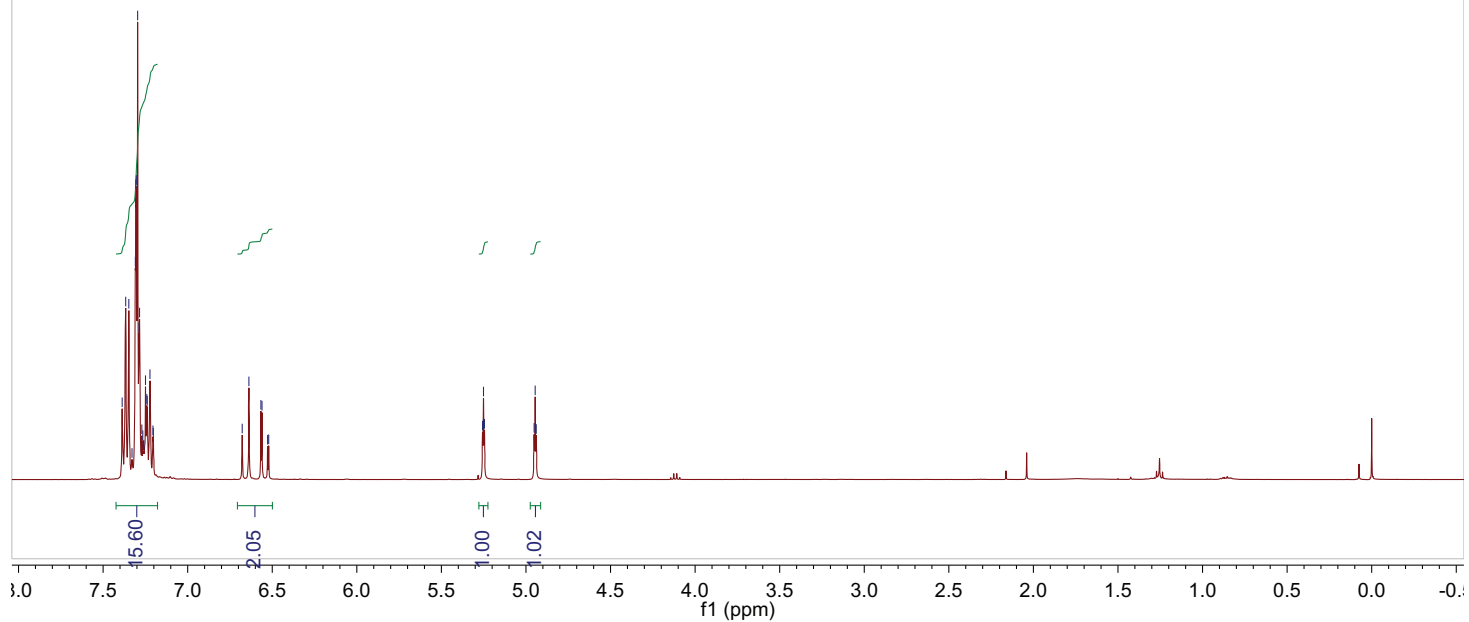

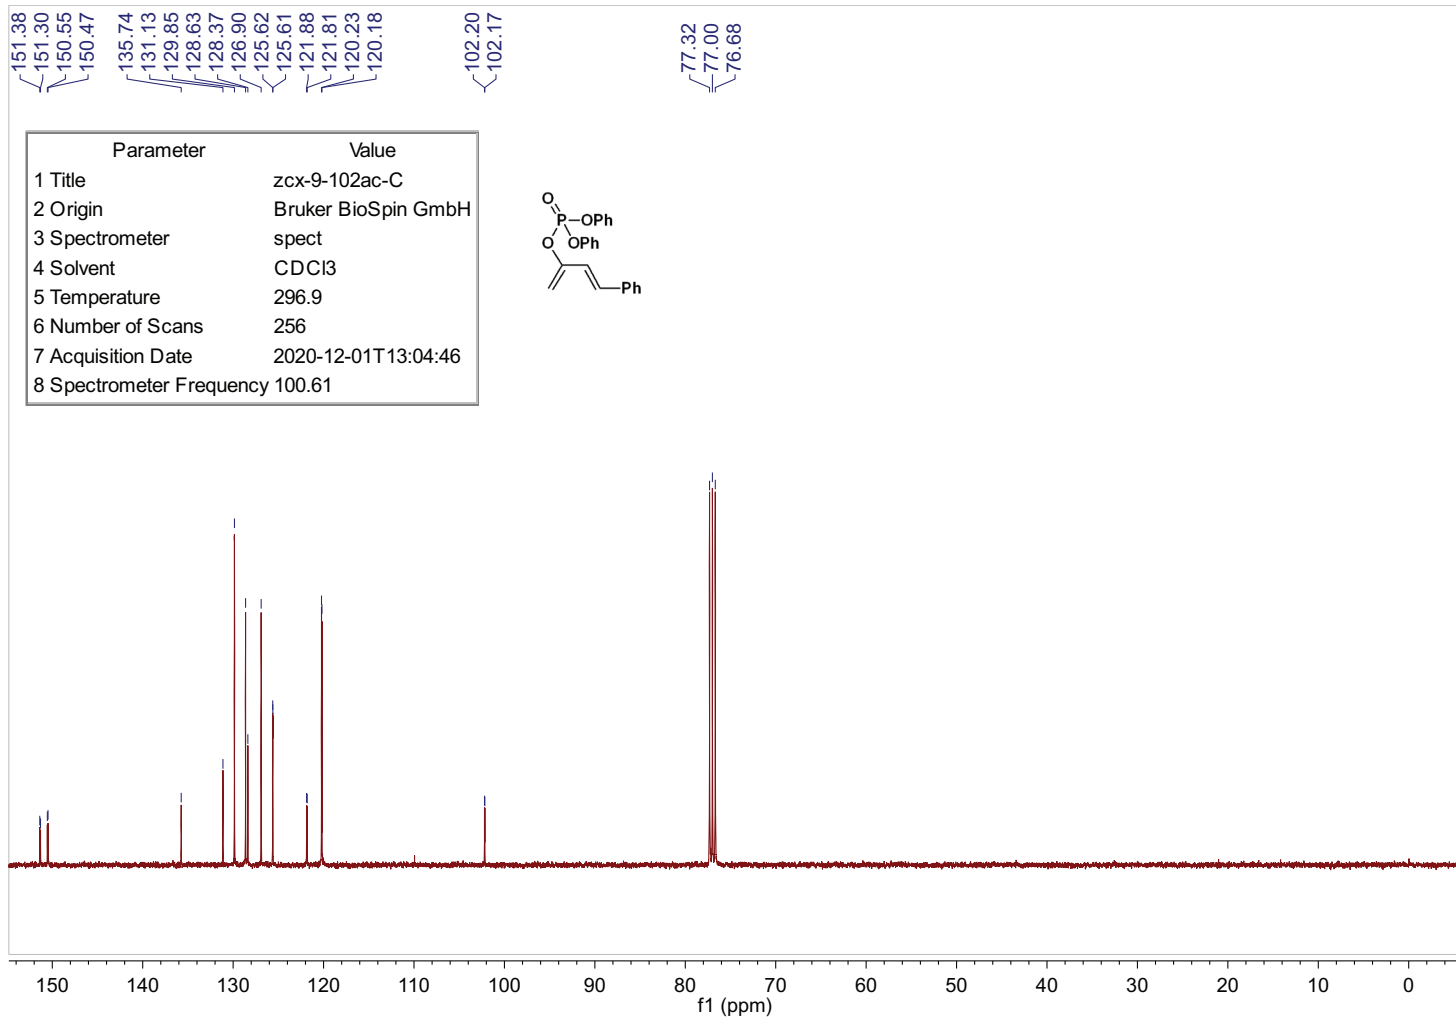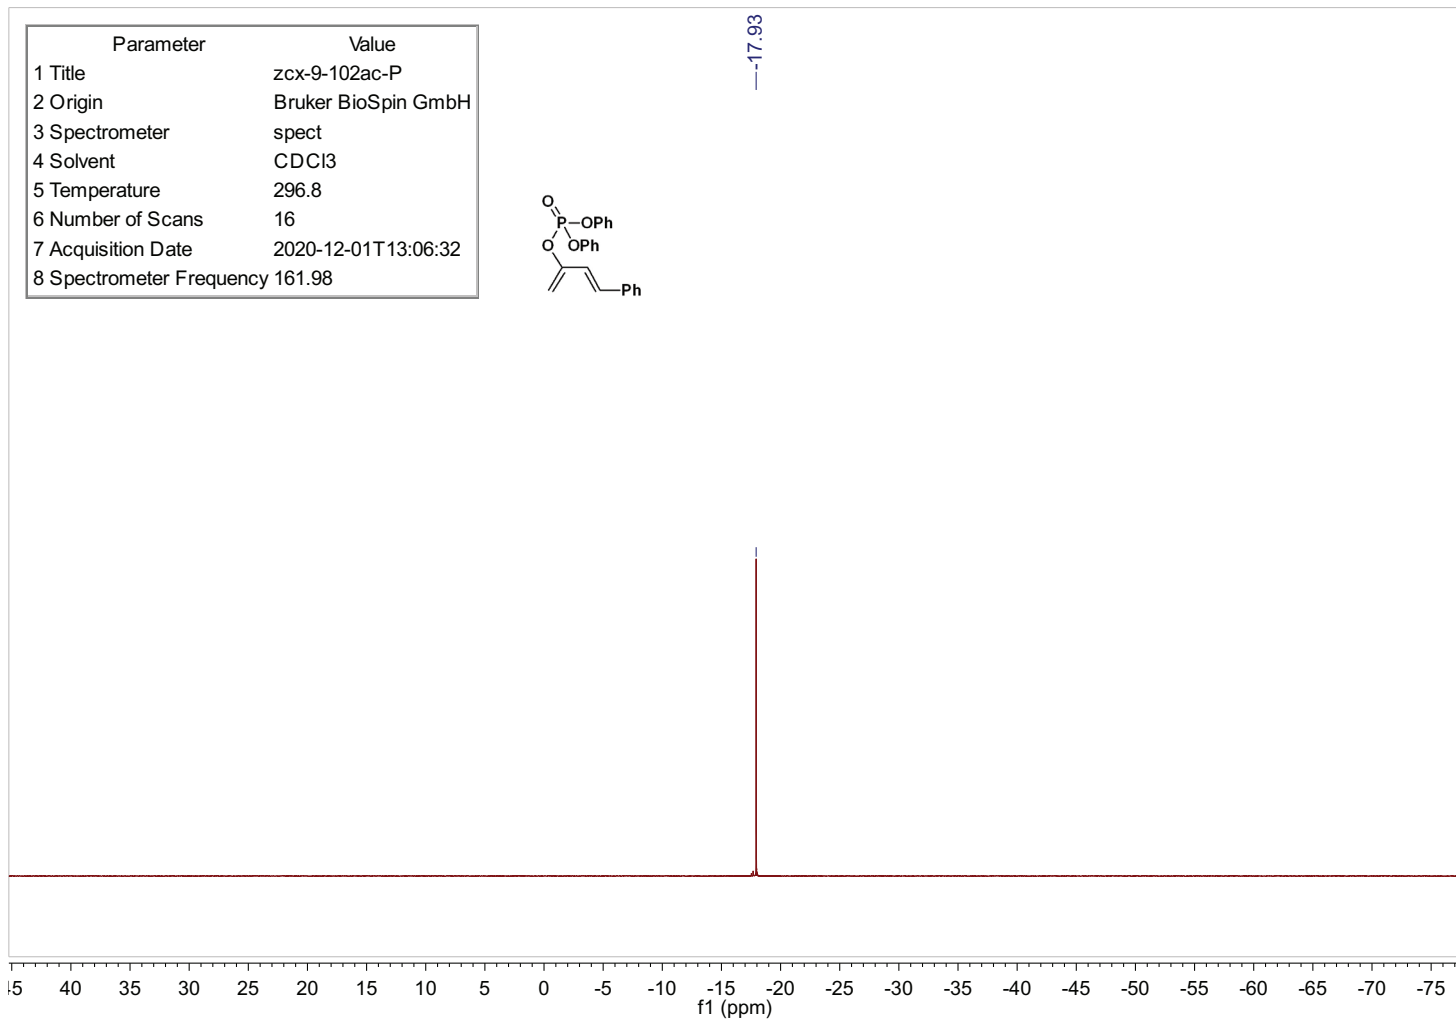

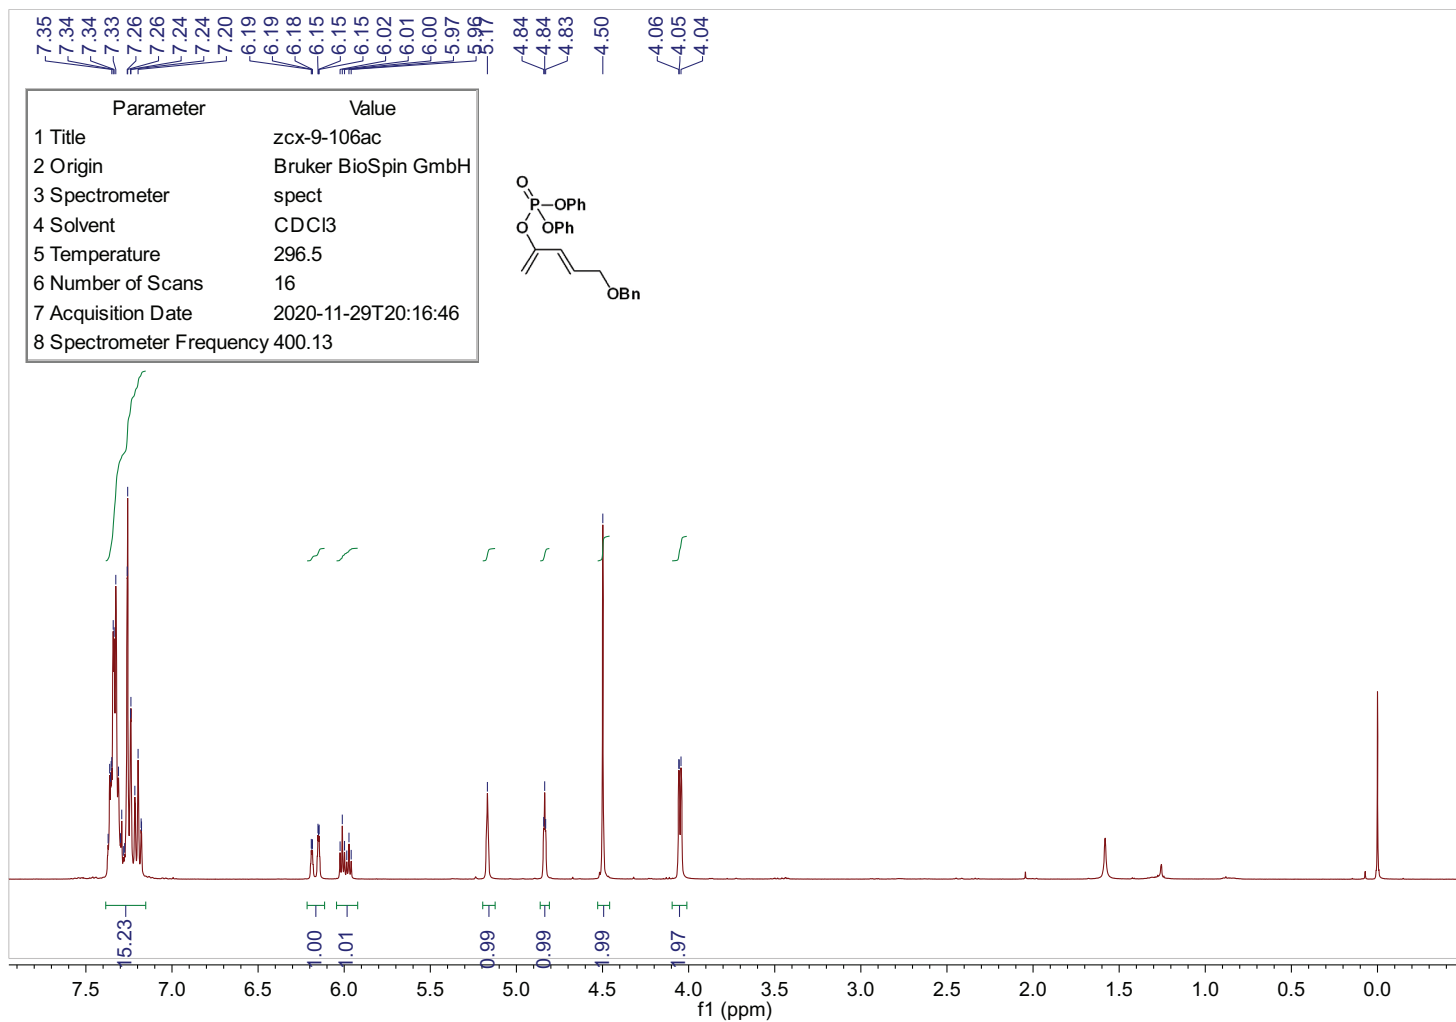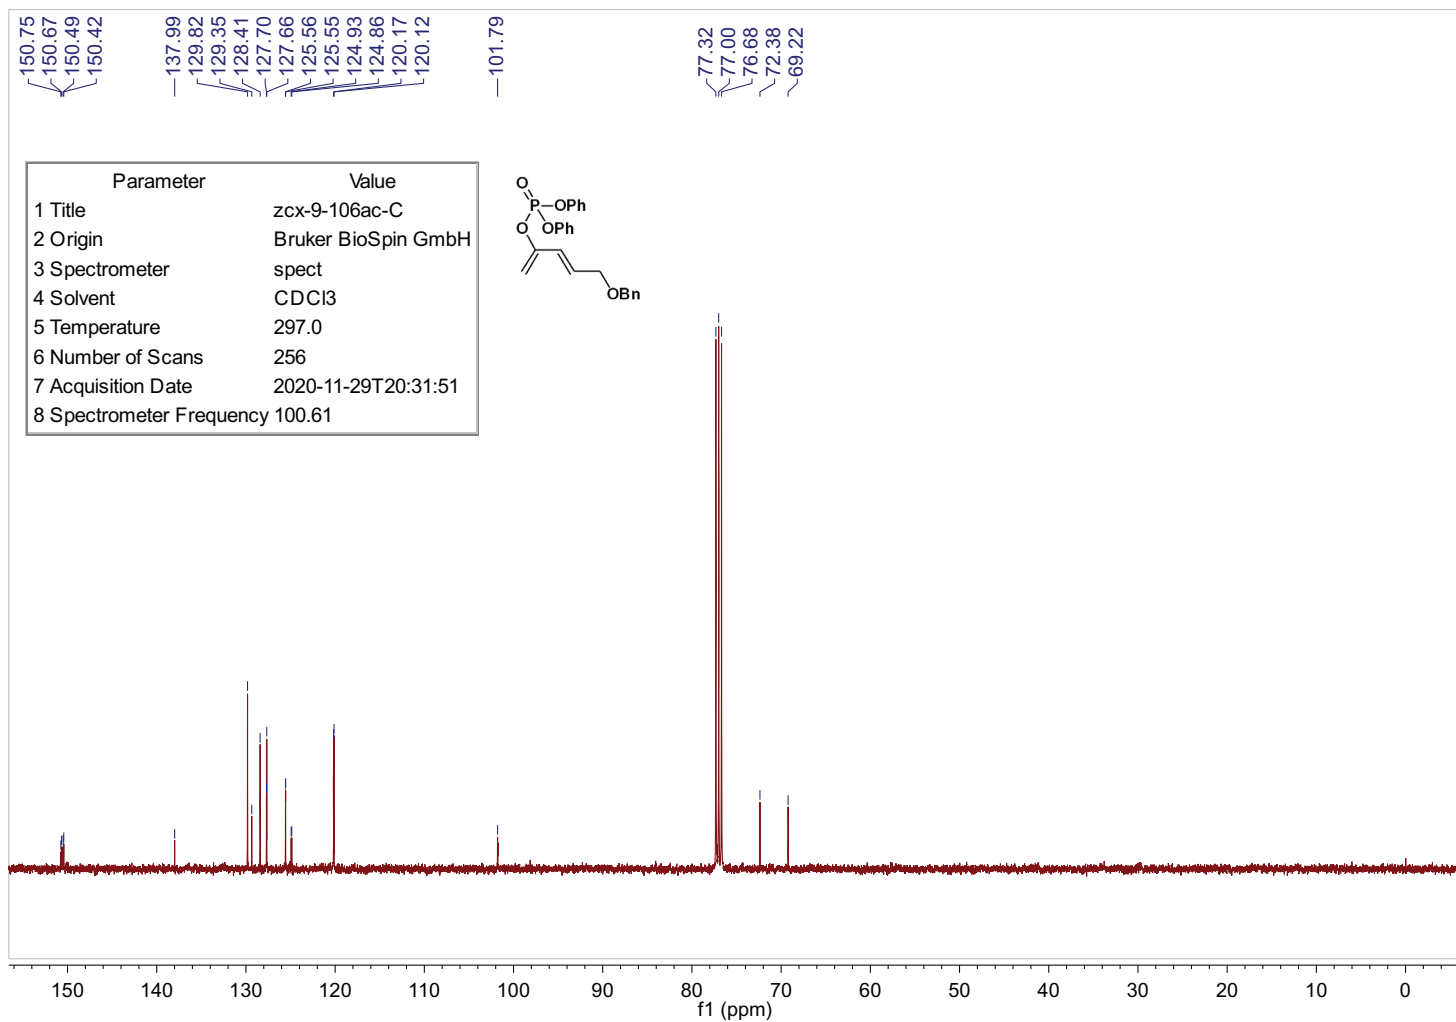

| Parameter                | Value               |
|--------------------------|---------------------|
| 1 Title                  | zcx-9-106ac-P       |
| 2 Origin                 | Bruker BioSpin GmbH |
| 3 Spectrometer           | spect               |
| 4 Solvent                | CDCl3               |
| 5 Temperature            | 296.5               |
| 6 Number of Scans        | 16                  |
| 7 Acquisition Date       | 2020-11-30T03:16:37 |
| 8 Spectrometer Frequency | 161.98              |

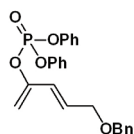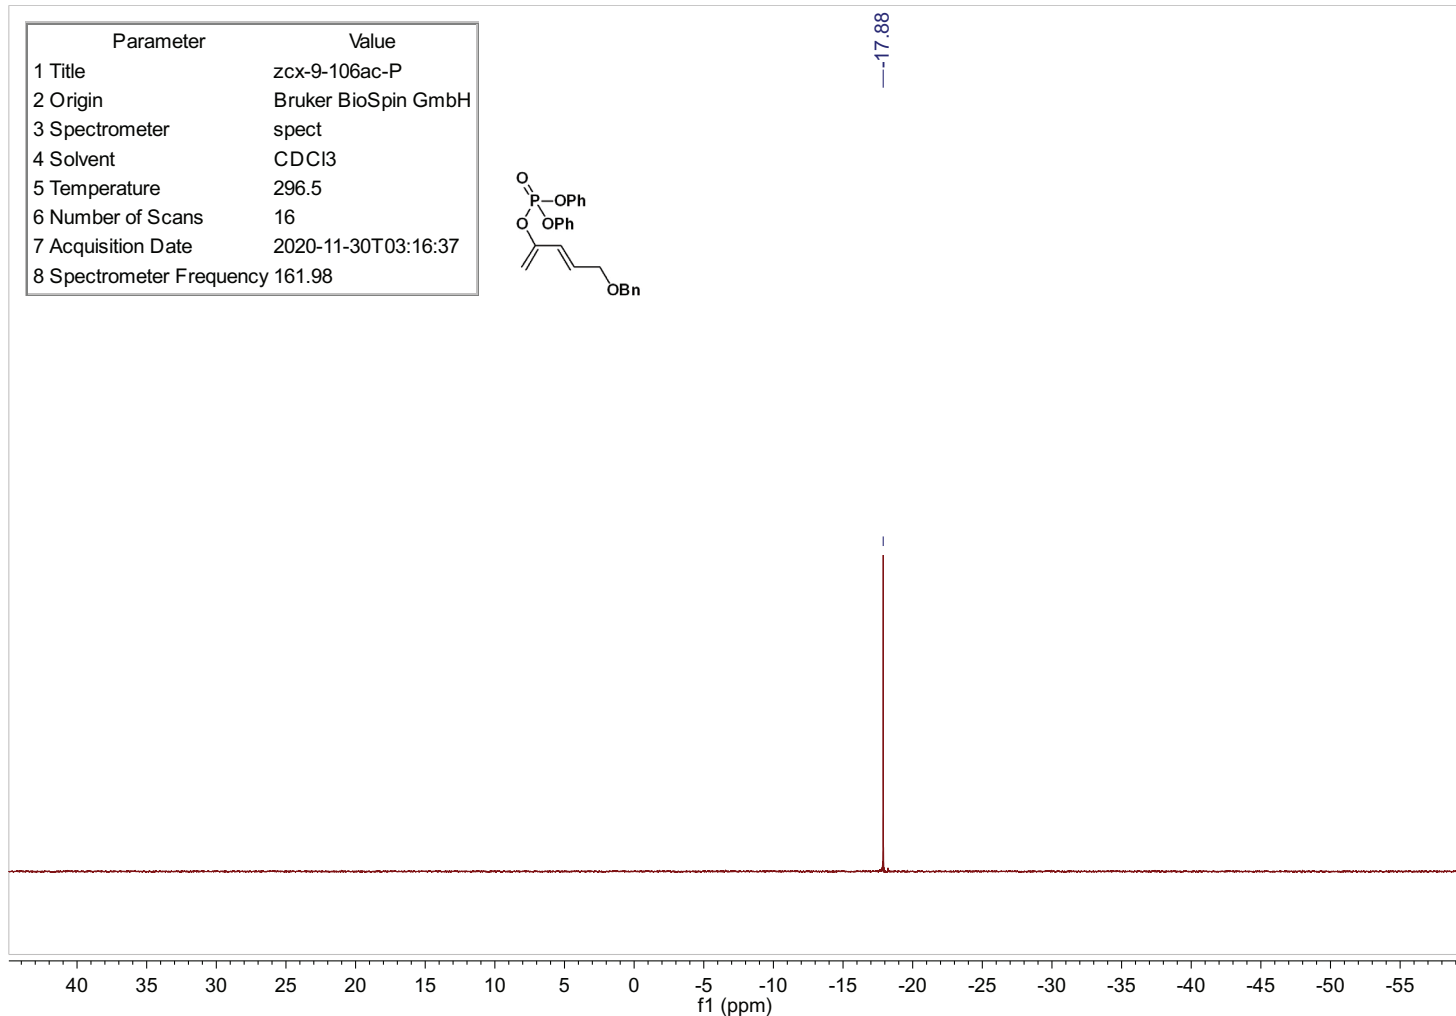

| Parameter                | Value               |
|--------------------------|---------------------|
| 1 Title                  | zcx-9-148ac         |
| 2 Origin                 | Bruker BioSpin GmbH |
| 3 Spectrometer           | spect               |
| 4 Solvent                | CDCl3               |
| 5 Temperature            | 295.8               |
| 6 Experiment             | 1D                  |
| 7 Number of Scans        | 4                   |
| 8 Acquisition Date       | 2020-12-25T16:42:45 |
| 9 Spectrometer Frequency | 400.13              |

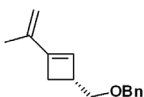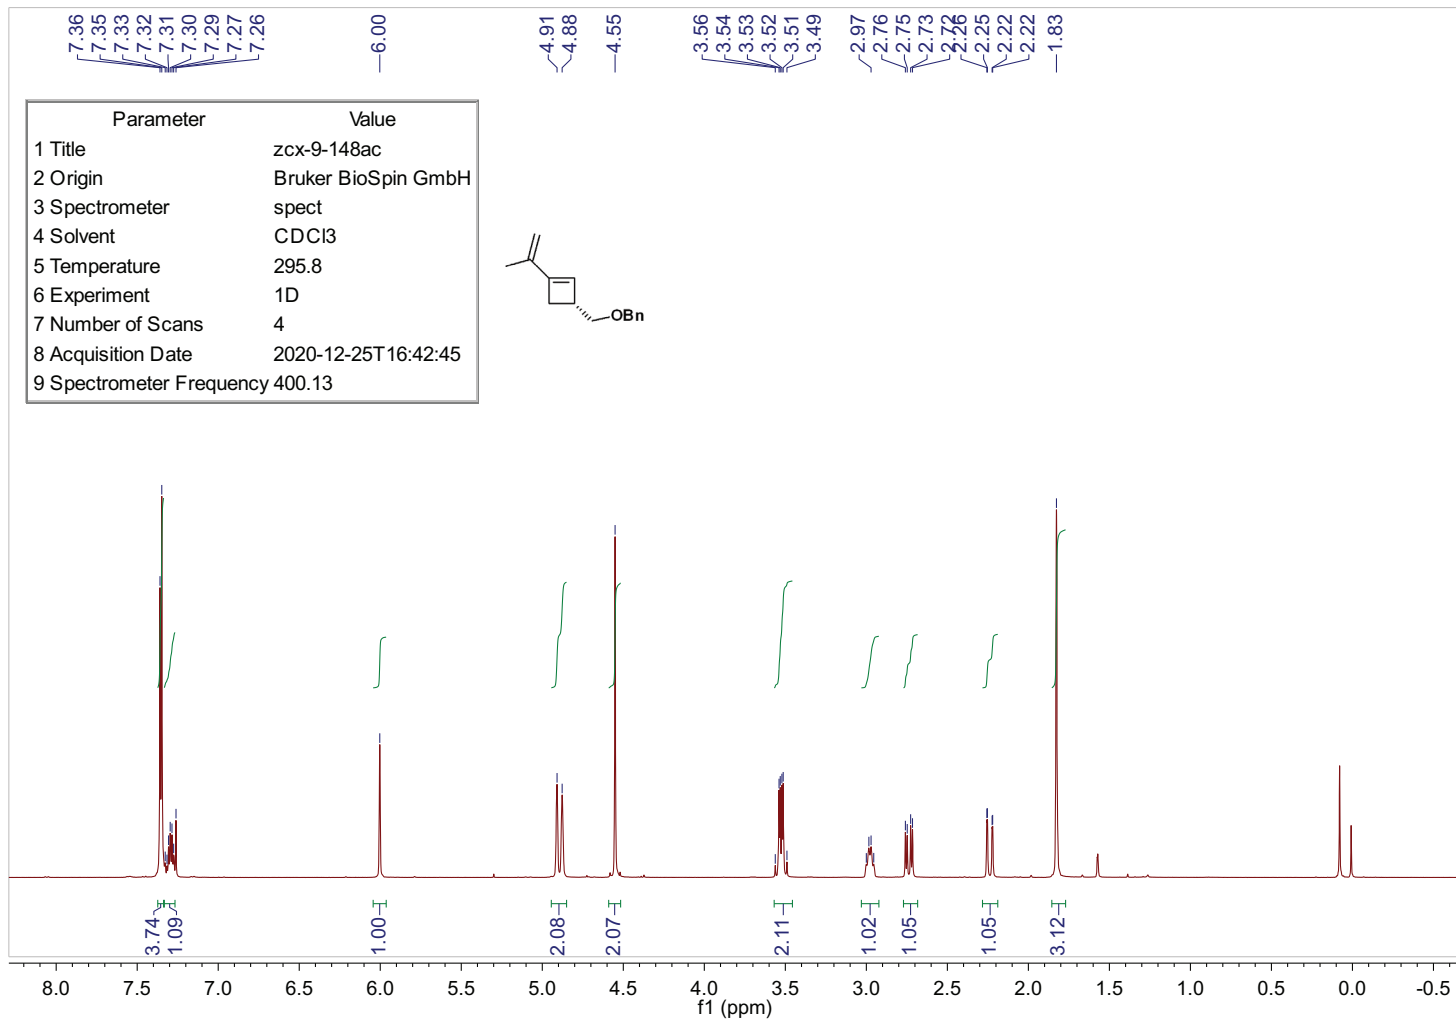



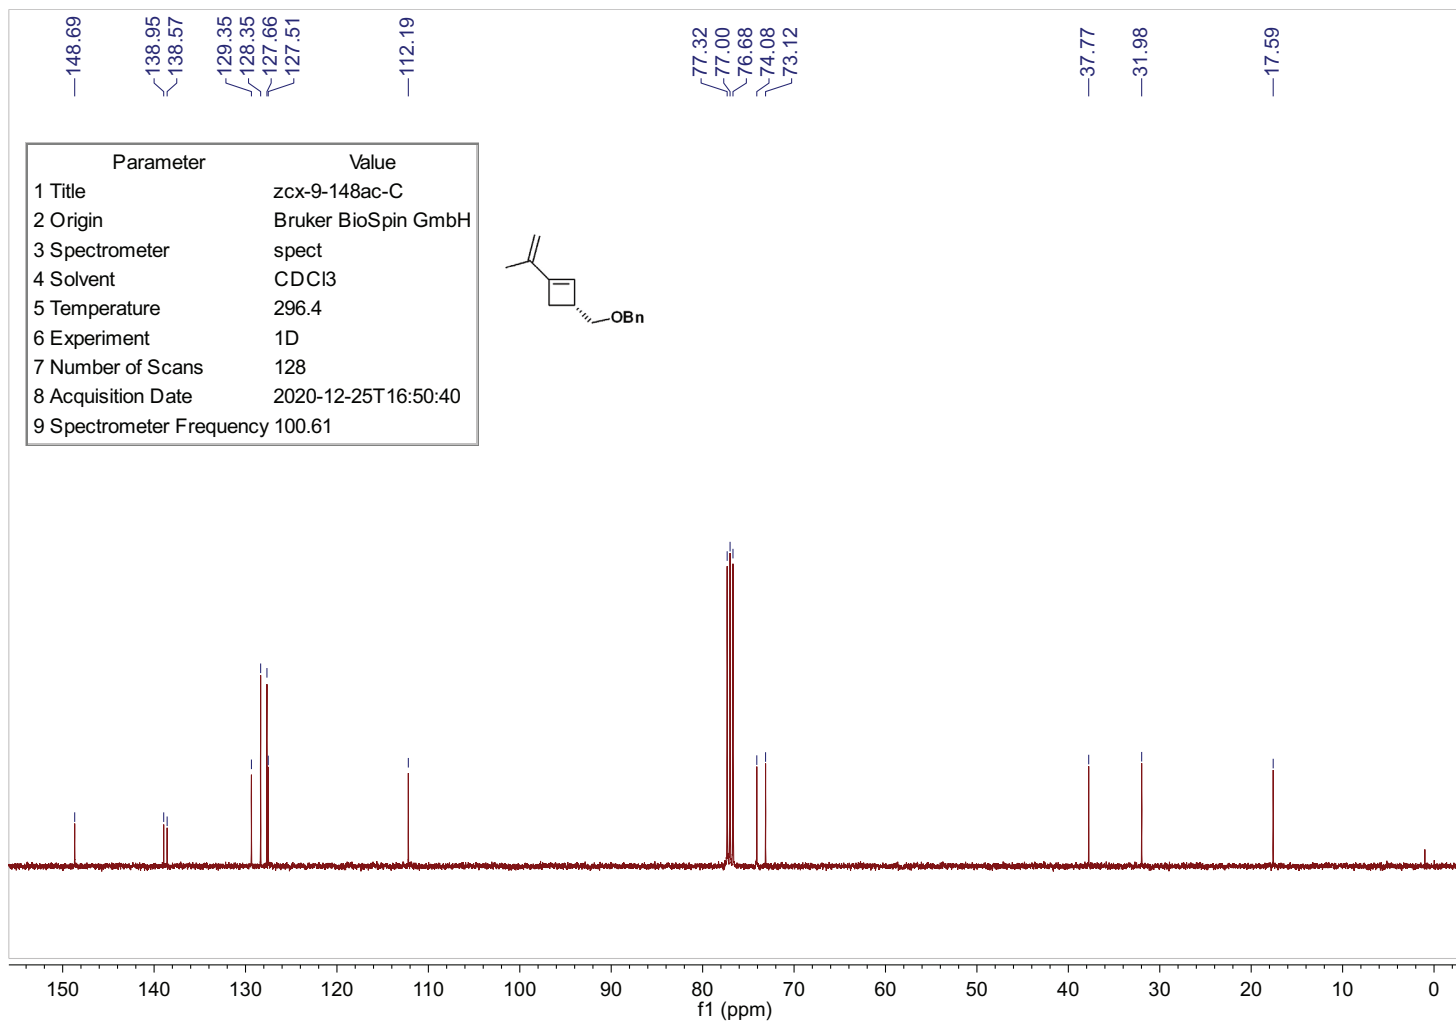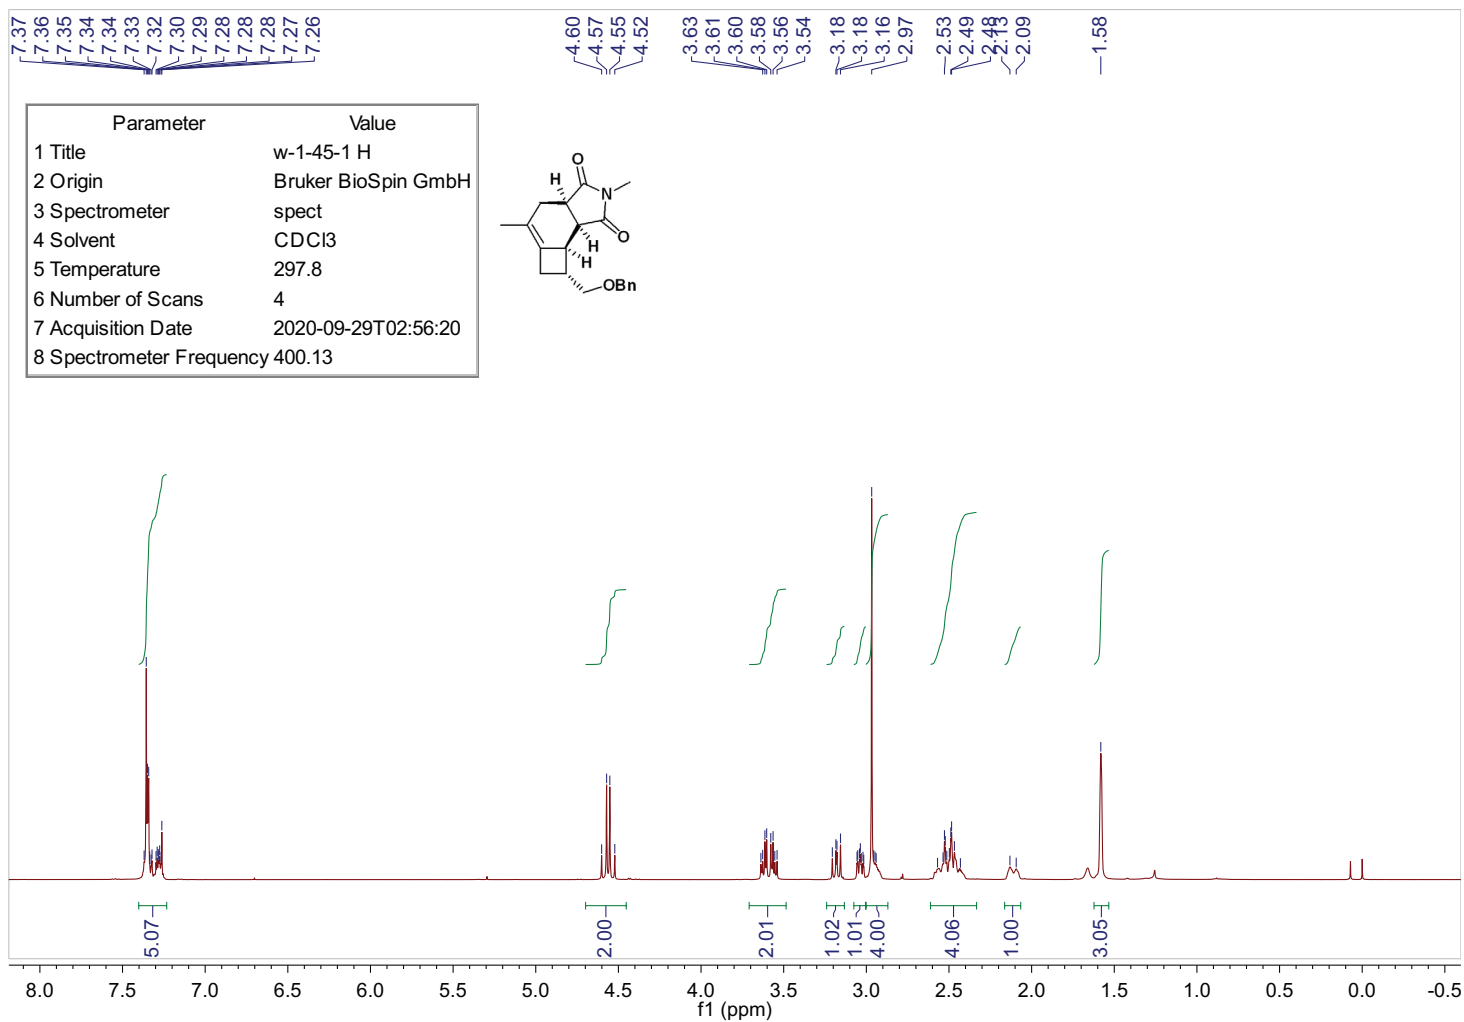

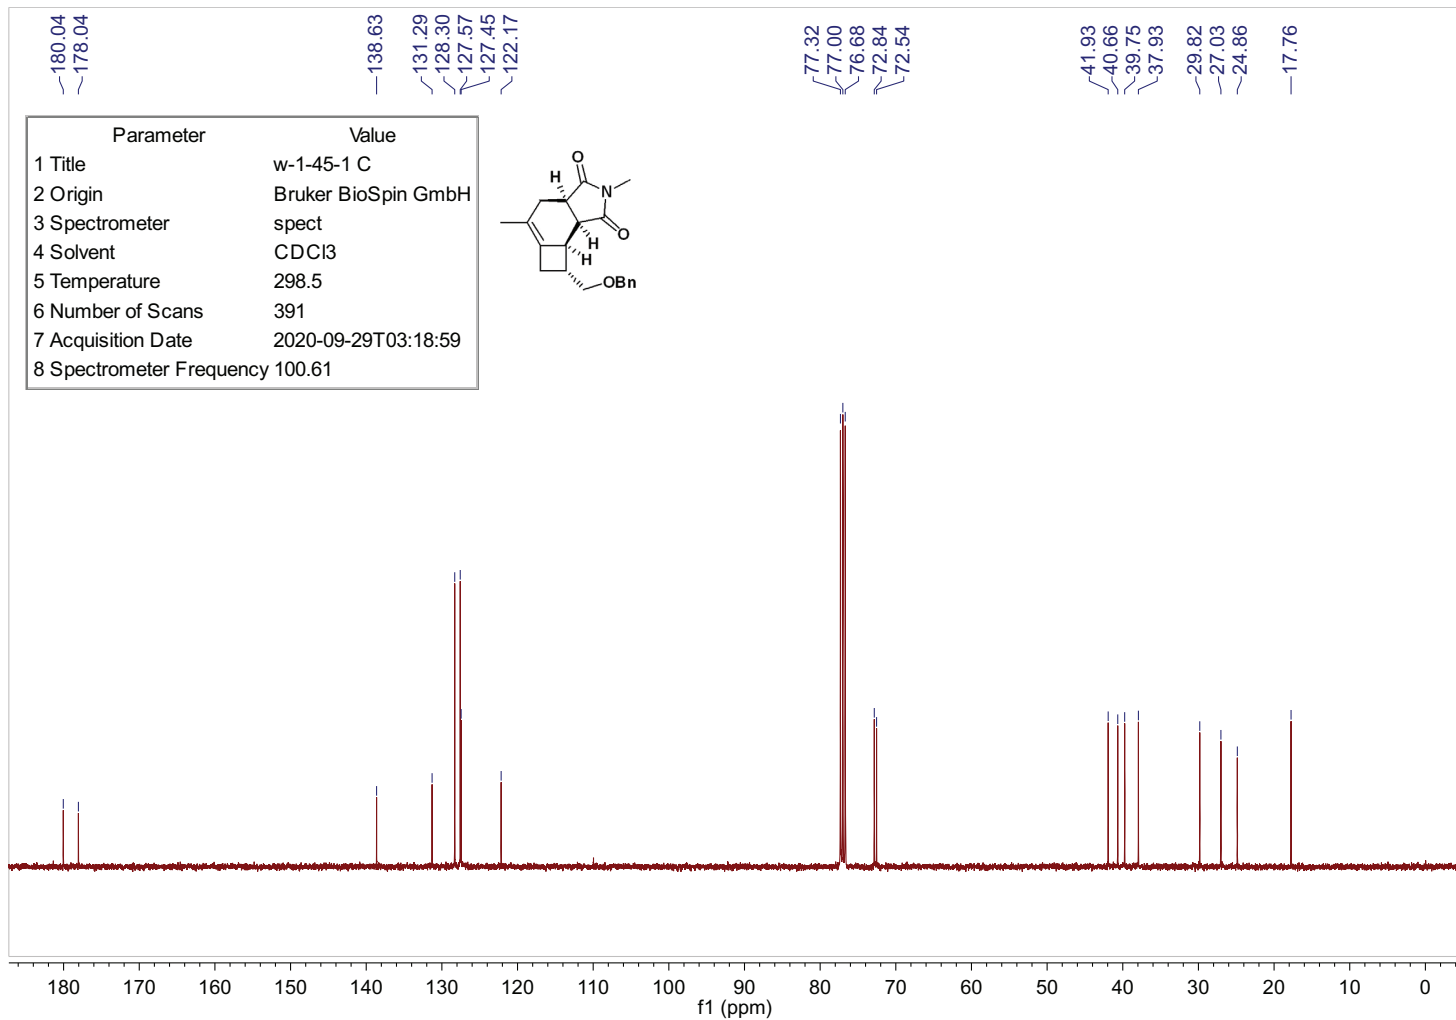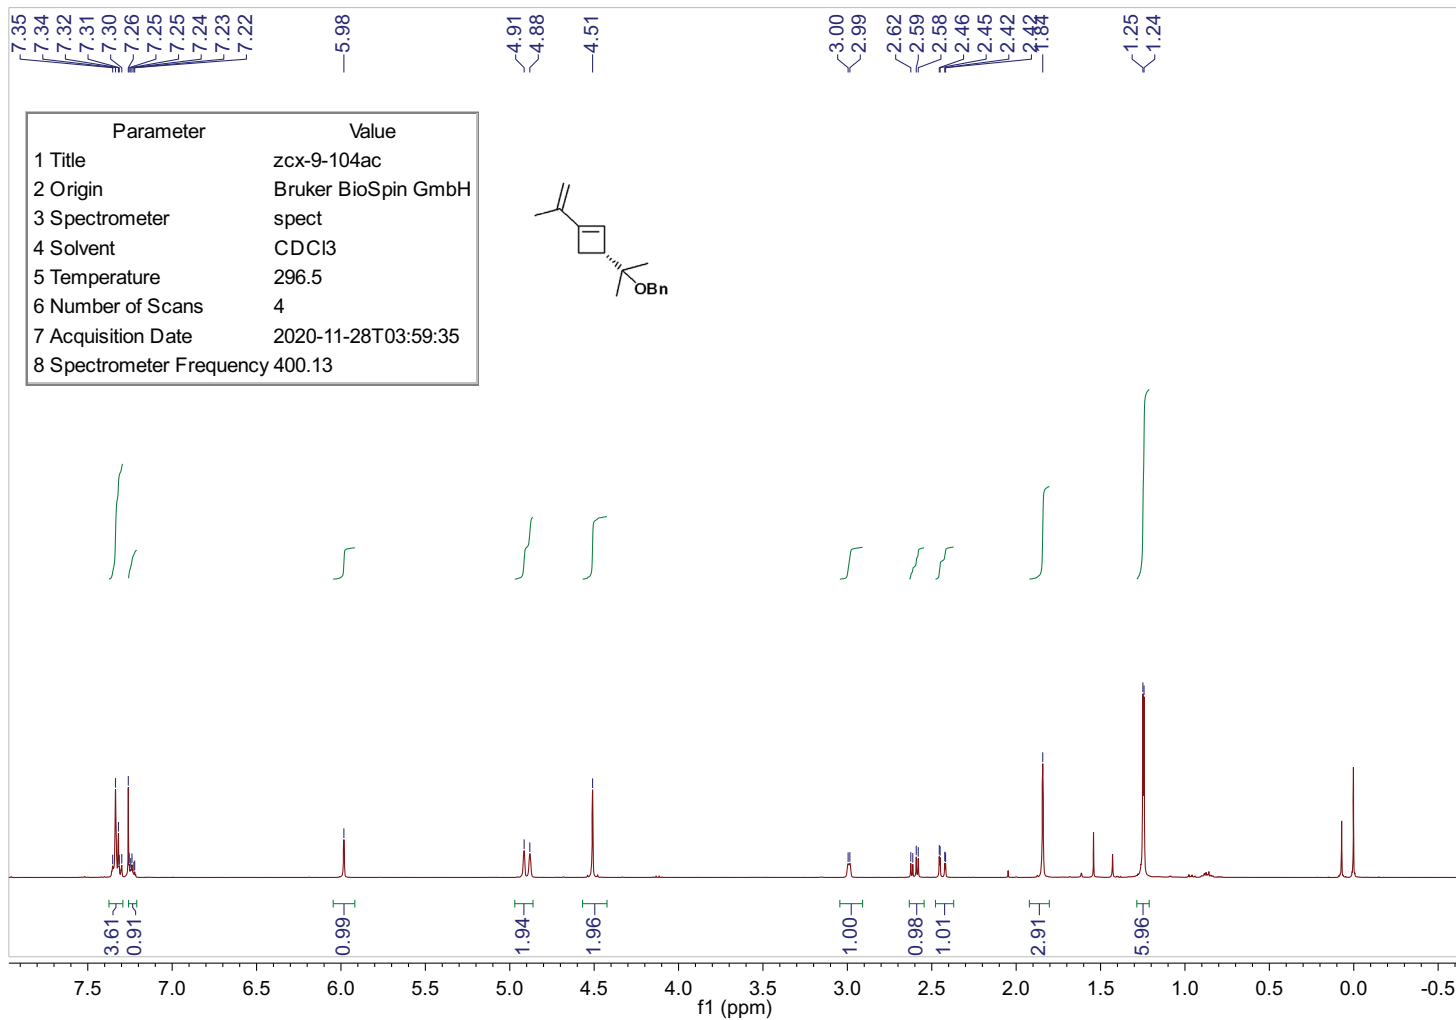

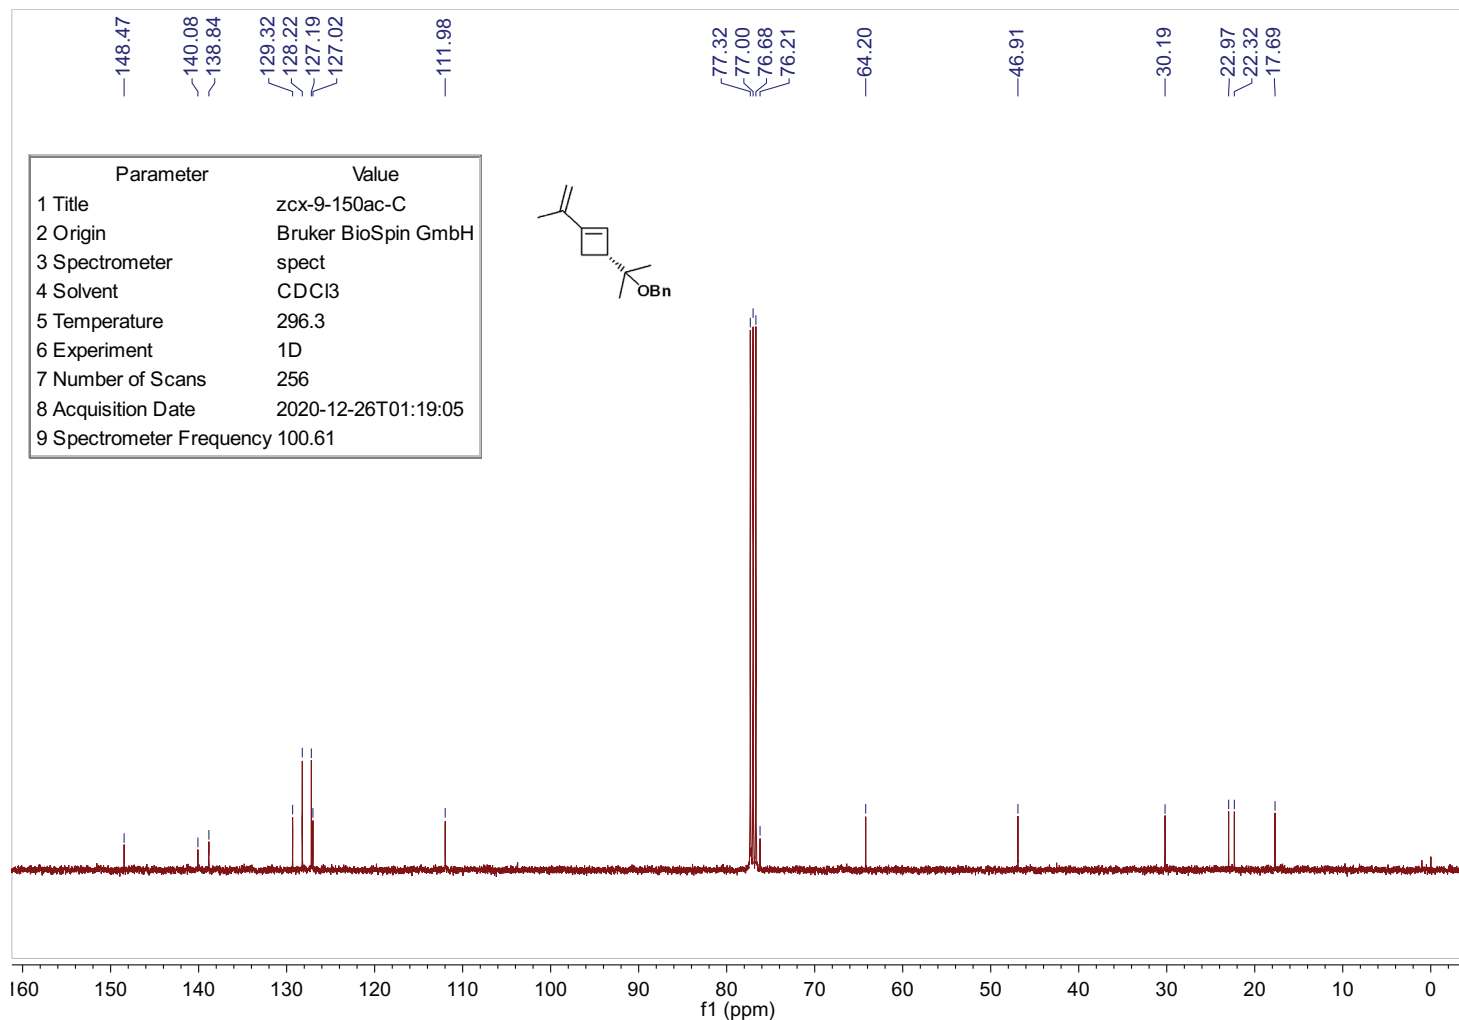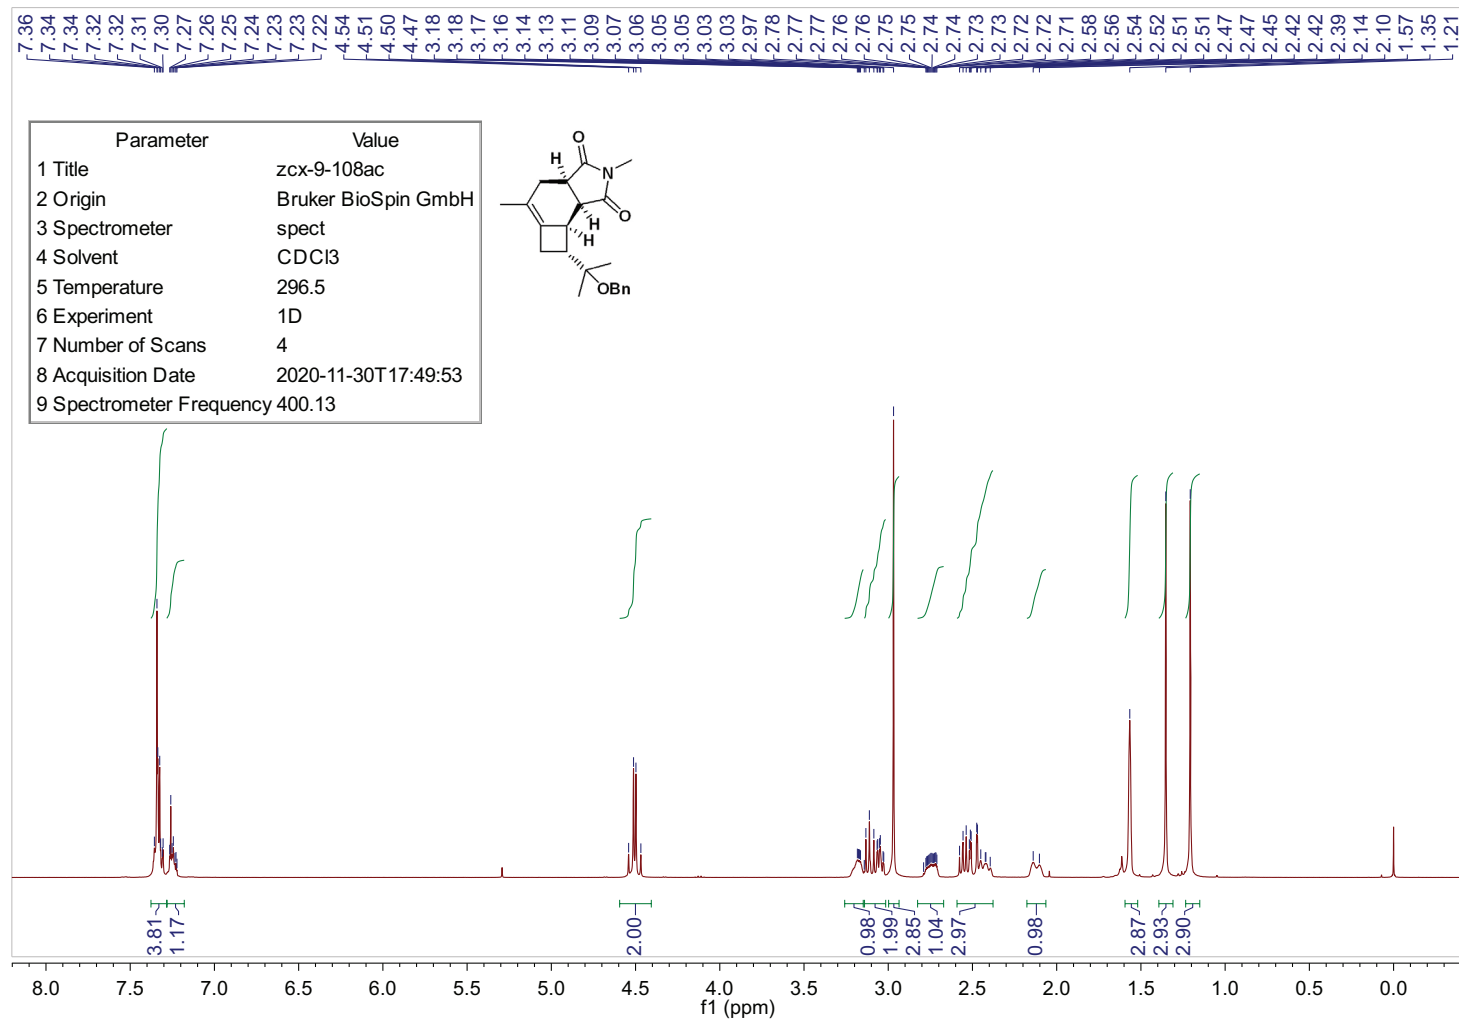

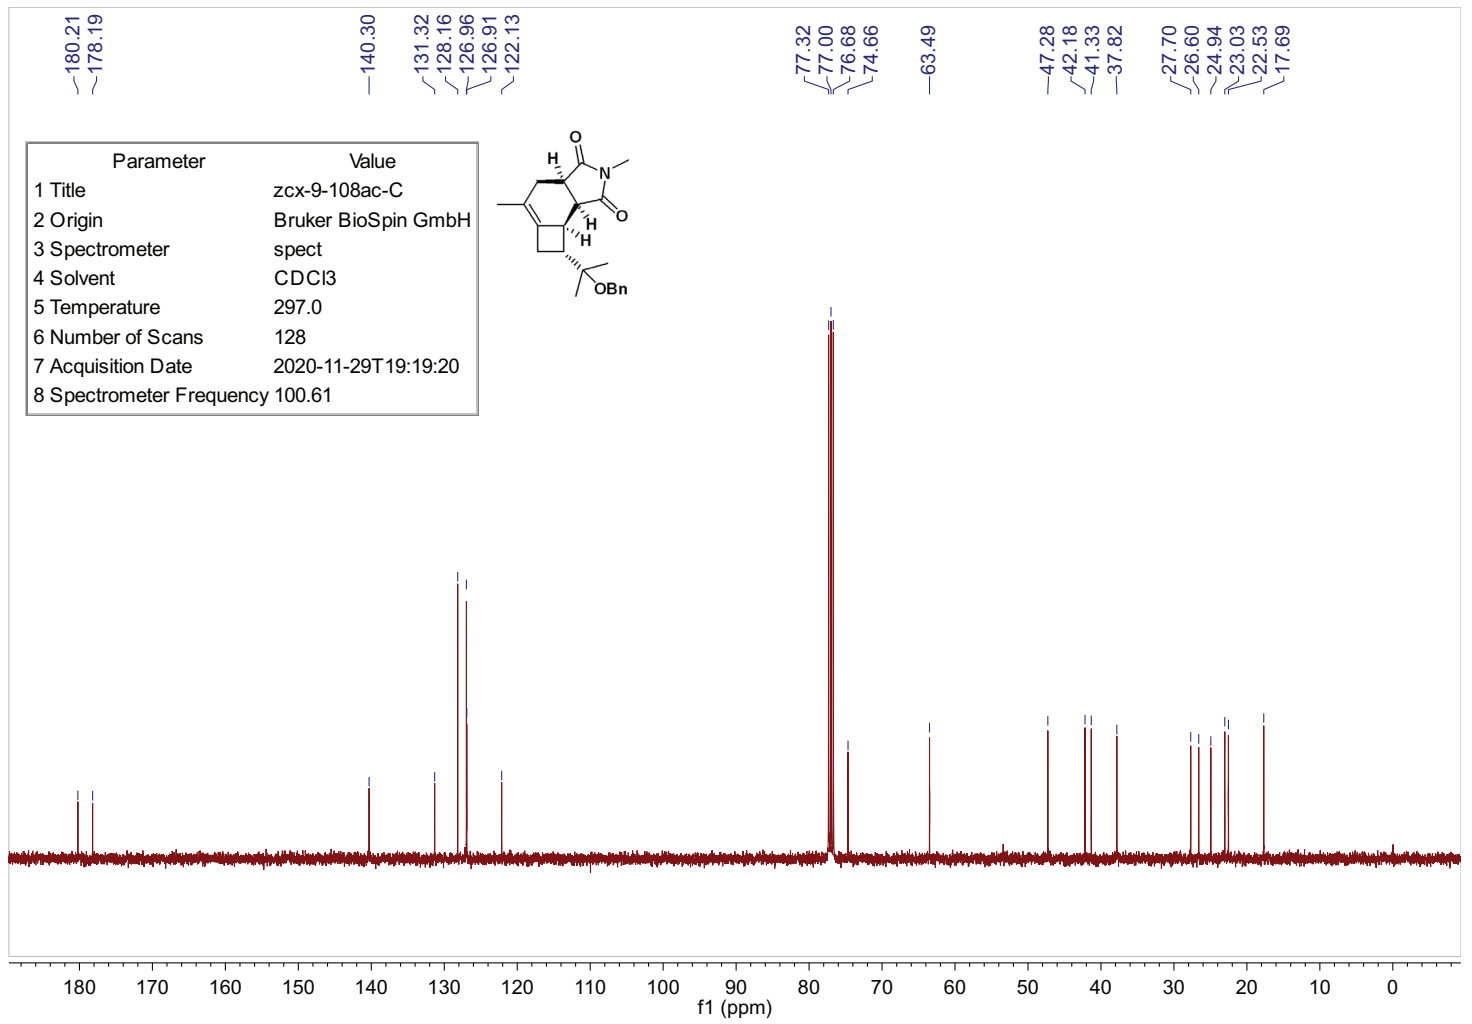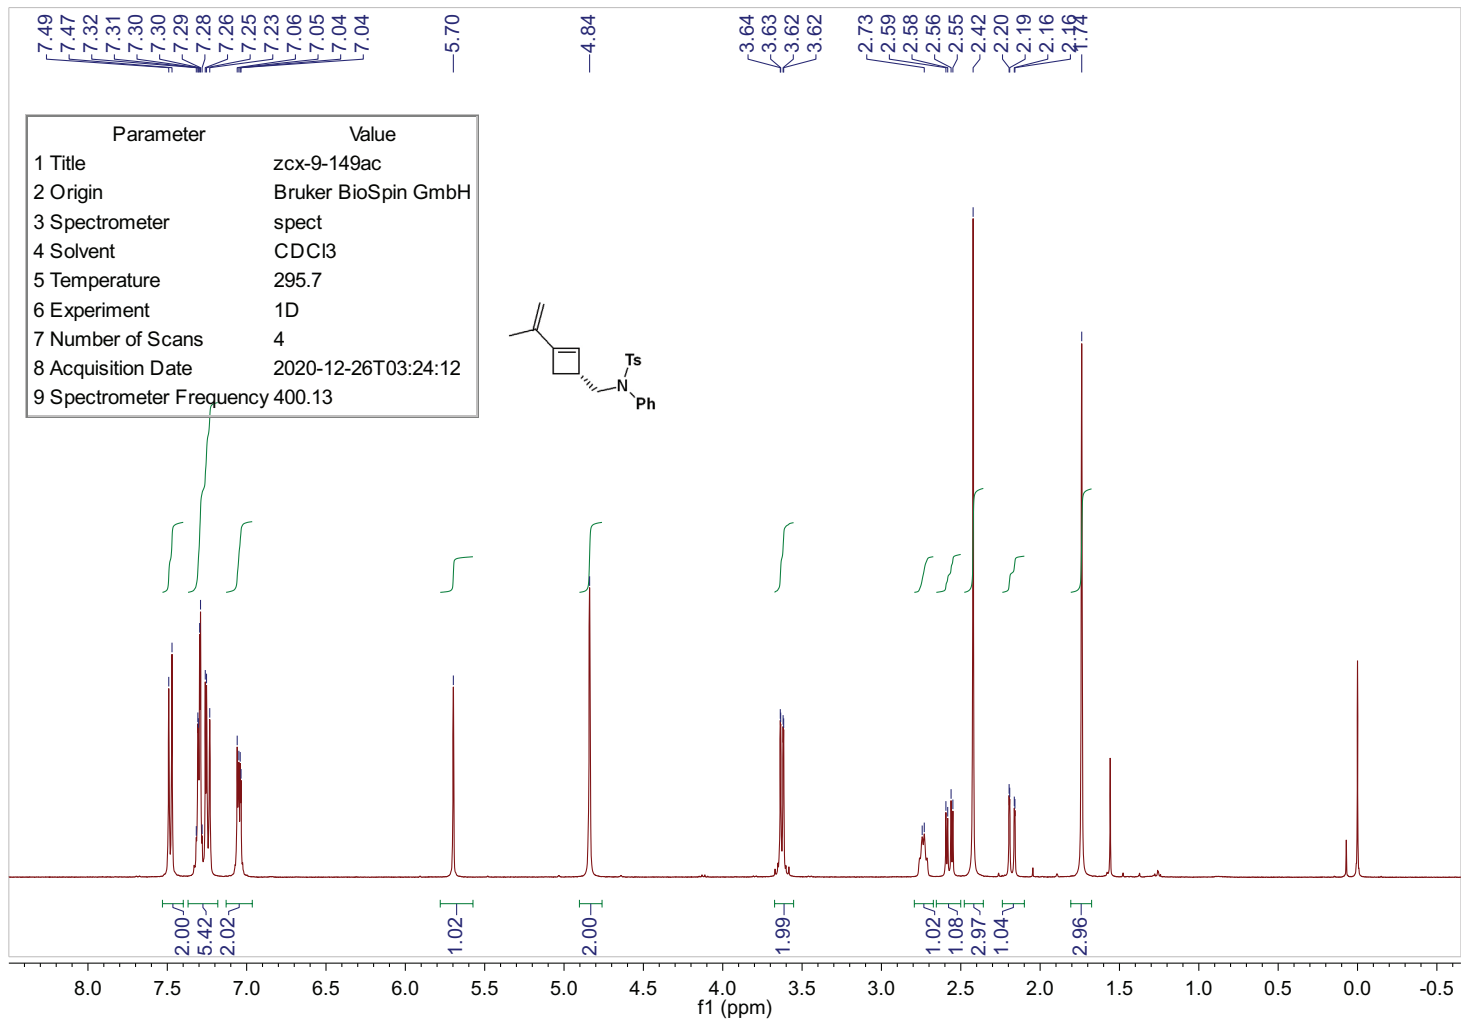

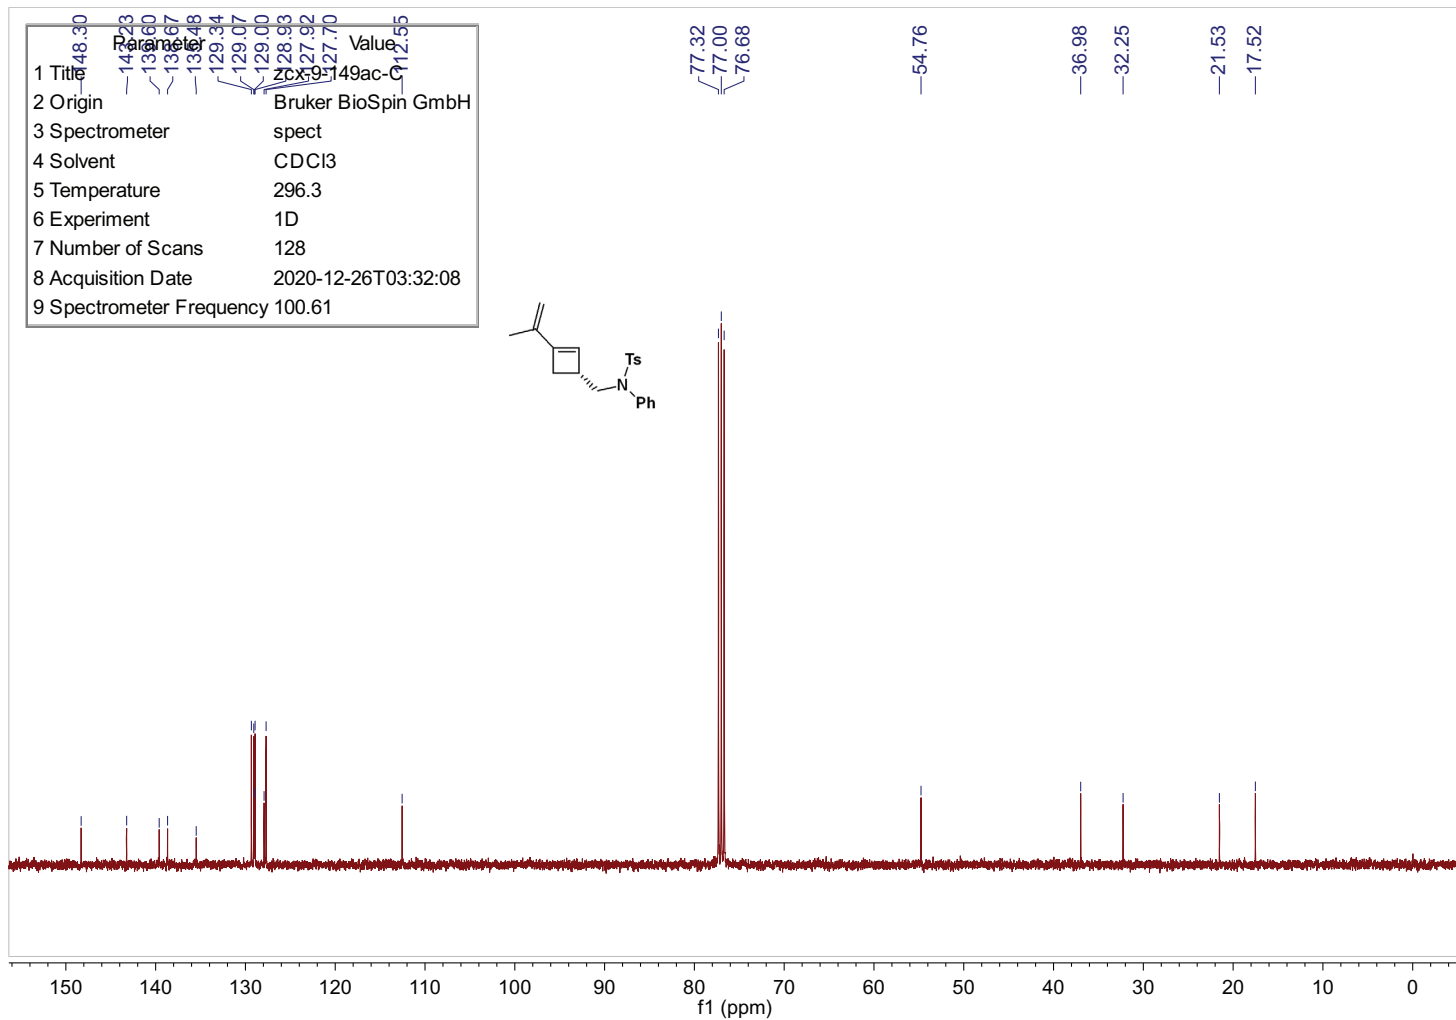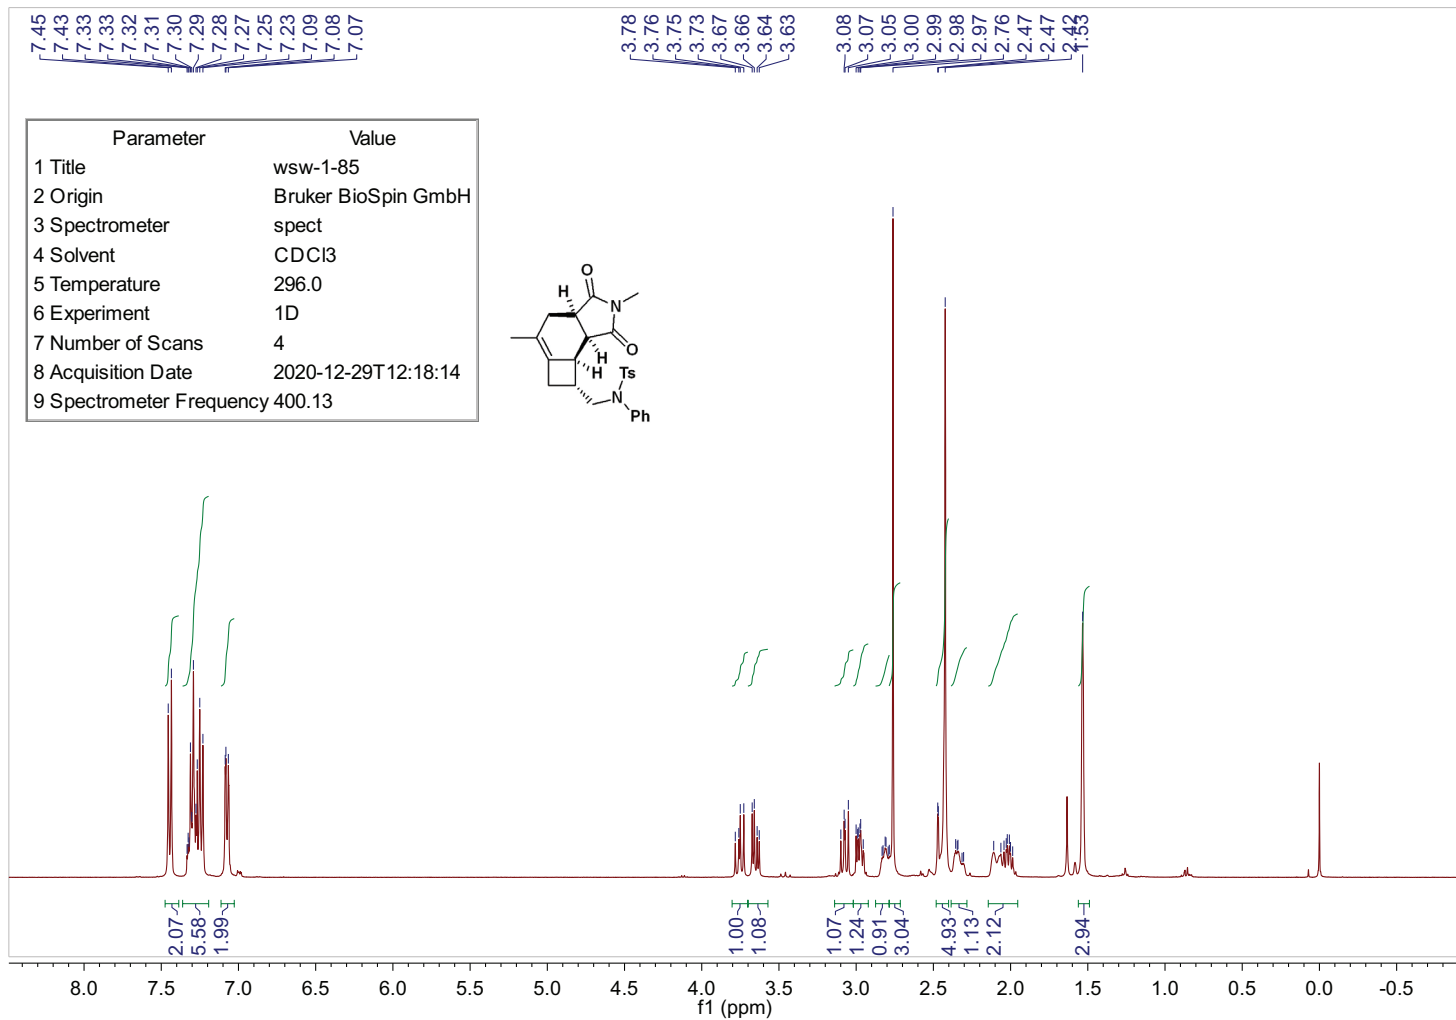

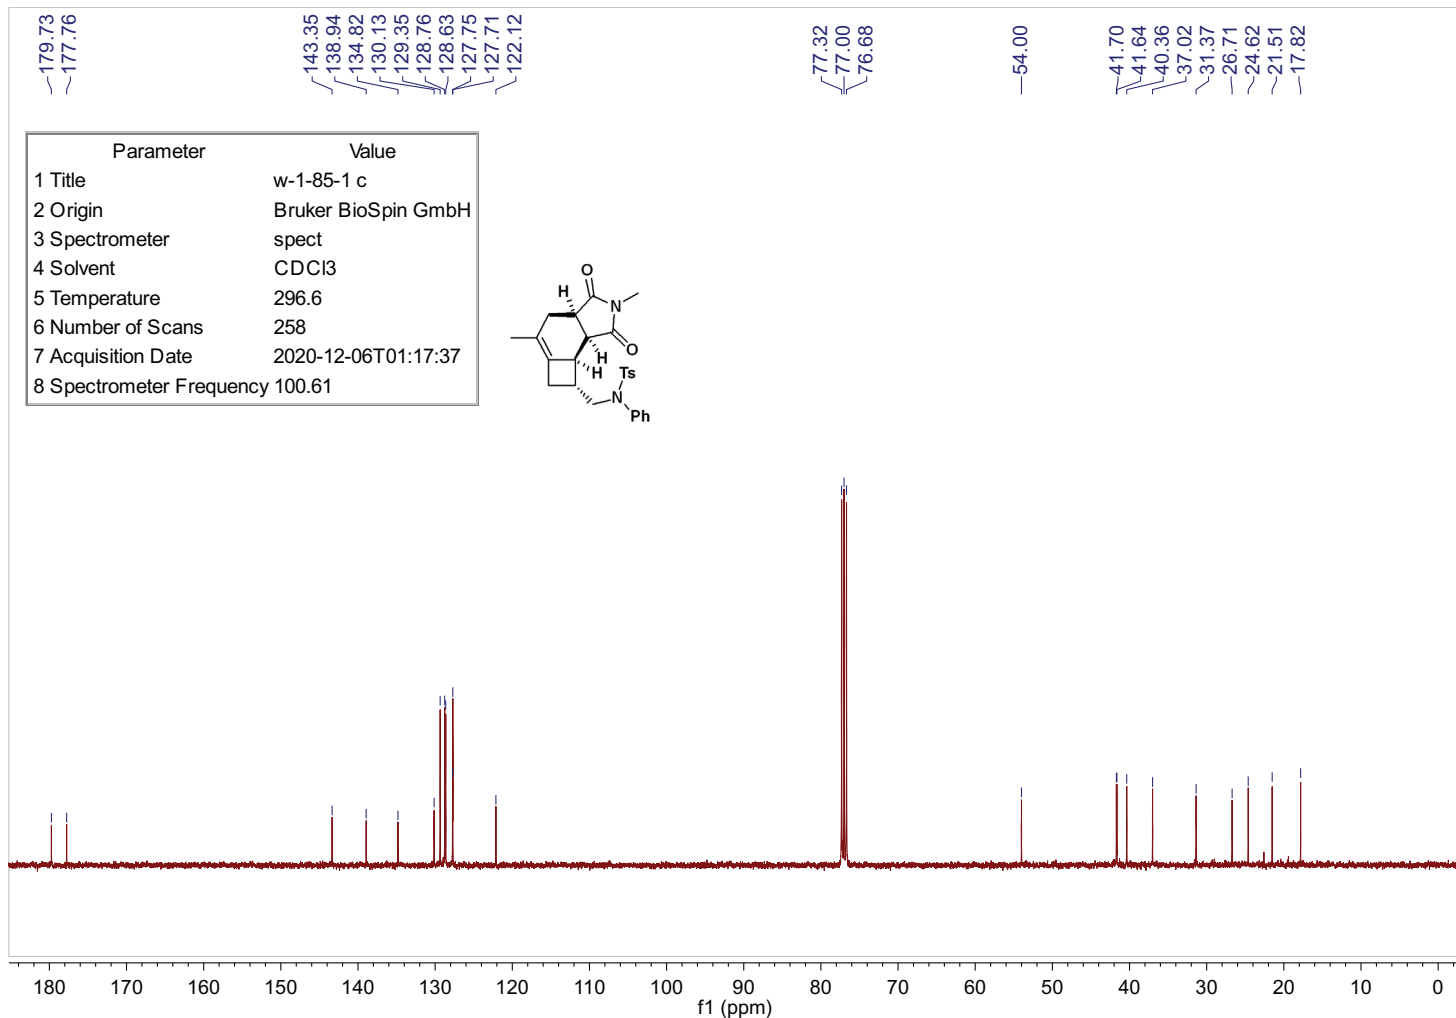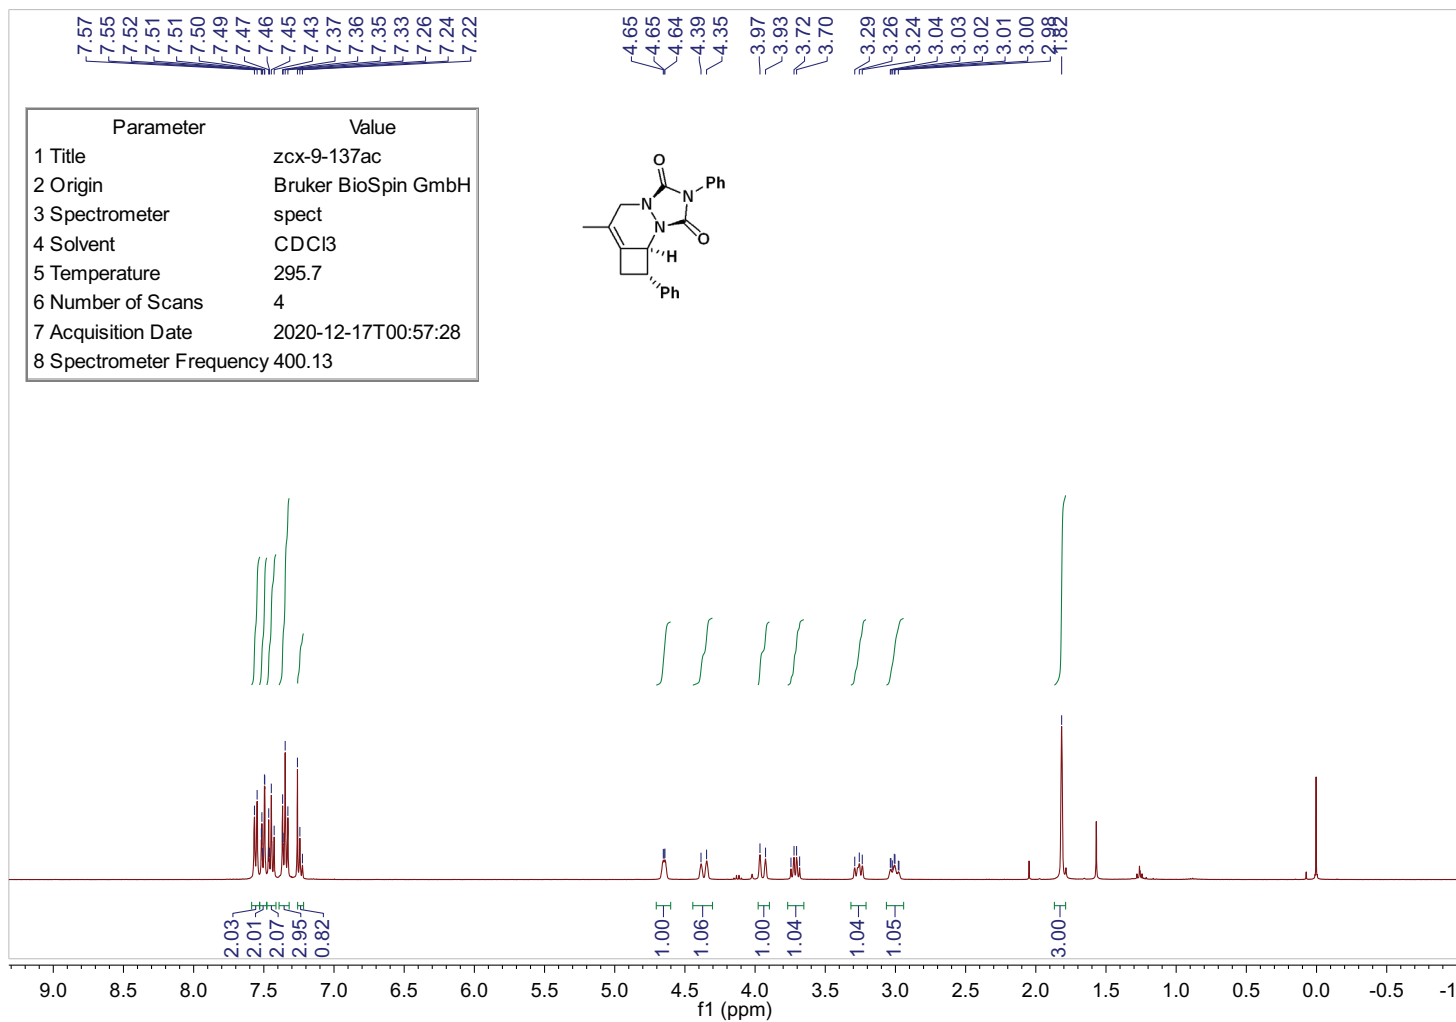

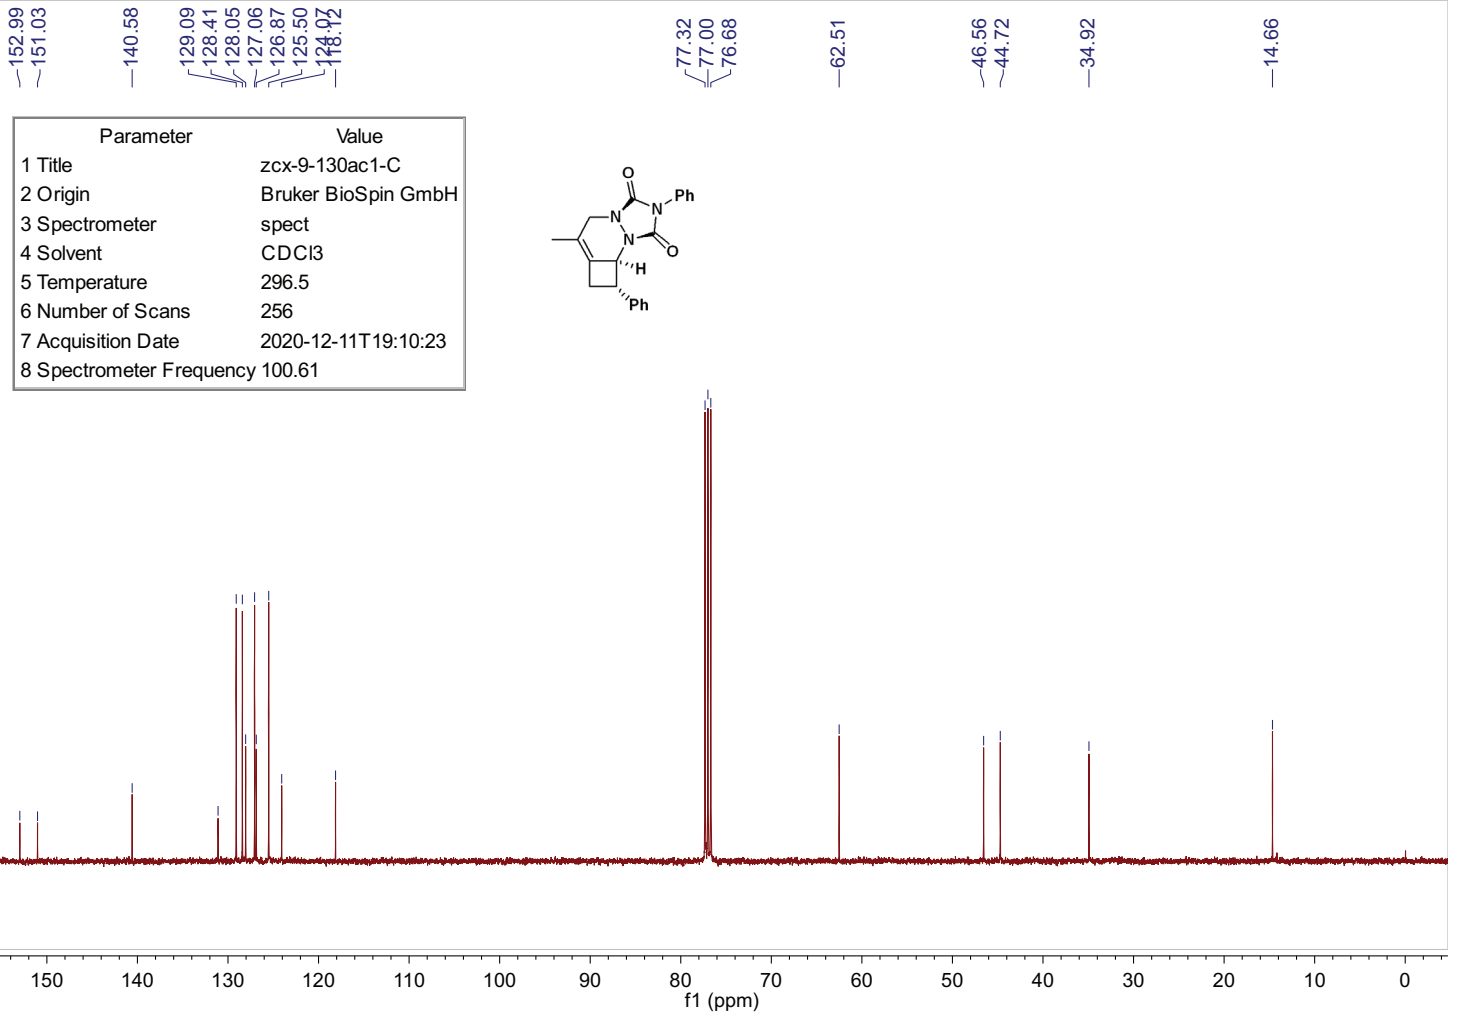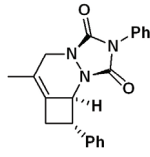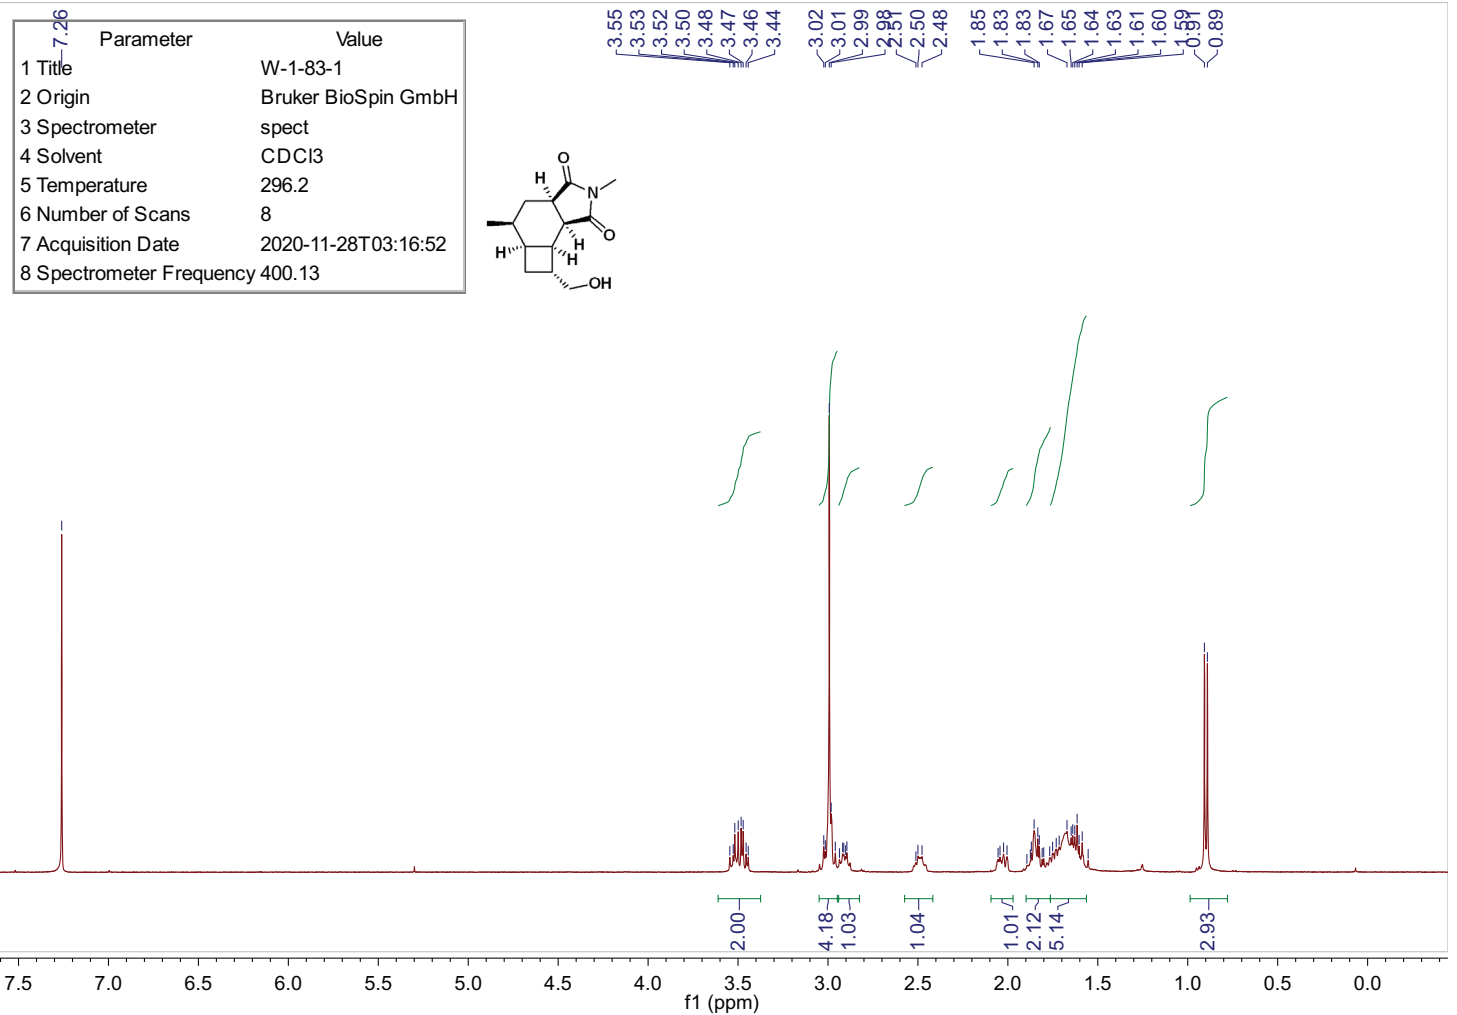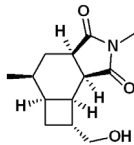

181.21  
180.29

77.32  
77.00  
76.68  
67.59

39.69  
39.66  
38.72  
37.24  
32.59  
29.49  
26.56  
24.67  
19.46  
17.06

| Parameter                | Value               |
|--------------------------|---------------------|
| 1 Title                  | w-1-83-1 c          |
| 2 Origin                 | Bruker BioSpin GmbH |
| 3 Spectrometer           | spect               |
| 4 Solvent                | CDCl3               |
| 5 Temperature            | 297.2               |
| 6 Number of Scans        | 256                 |
| 7 Acquisition Date       | 2020-11-28T15:43:28 |
| 8 Spectrometer Frequency | 100.61              |

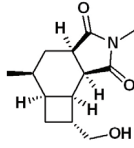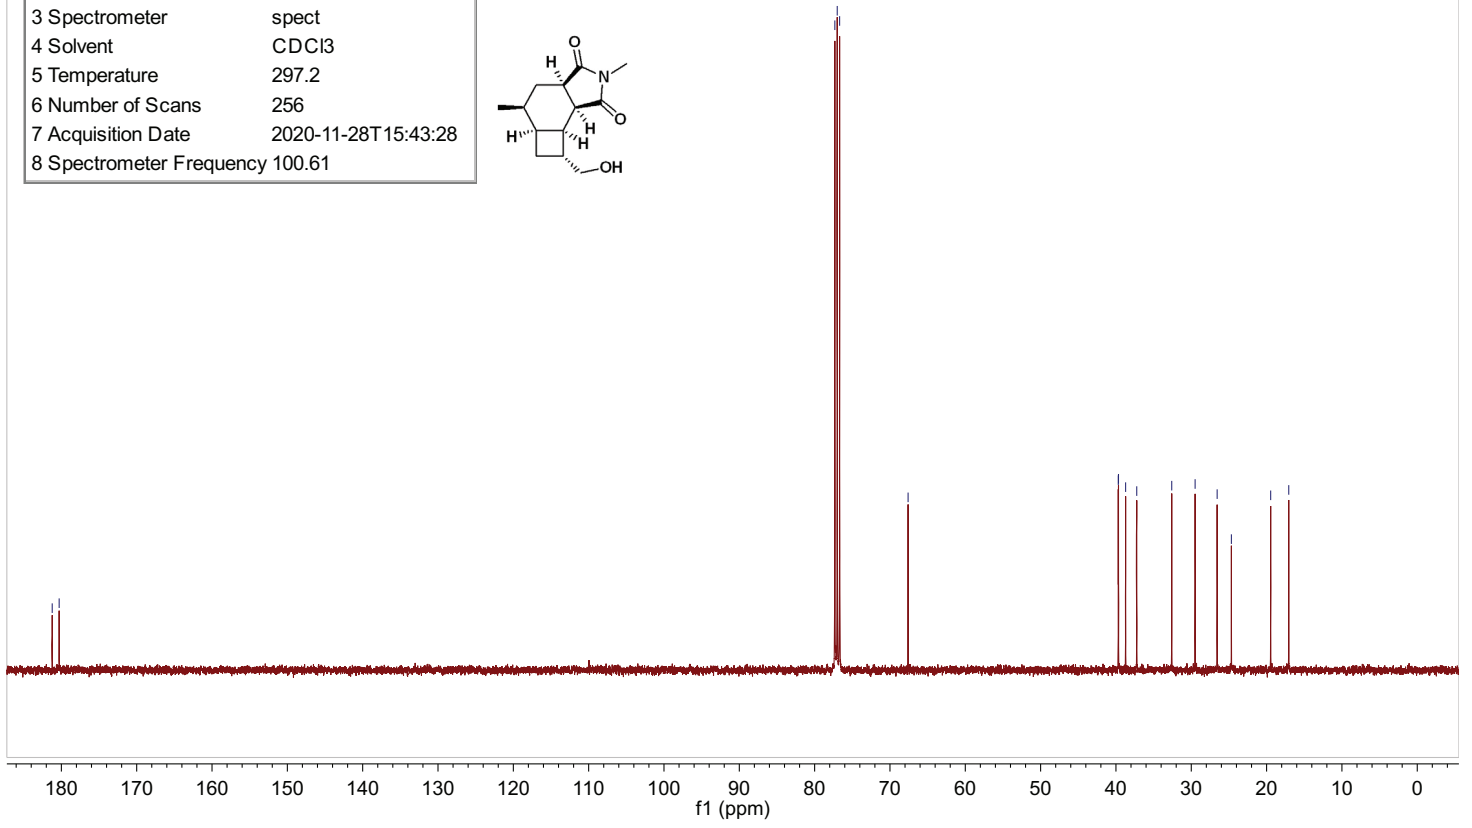



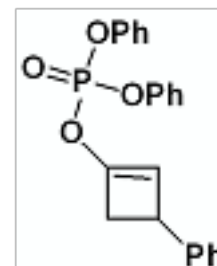

## <Sample Information>

Sample Name : zcx-7-11ac  
 Sample ID :  
 Data Filename : zcx-7-11ac.lcd

Method Filename : OJ-H;1 ml; 10% IPA in Hex;40 min.lcm

Batch Filename : zcx-7-11ac zcx-5-95 96ac.lcb

Vial # : 1-46

Sample Type : Unknown

Injection Volume : 10 uL

Date Acquired : 10/26/2019 11:13:36 AM

Acquired by : System Administrator

Date Processed : 10/26/2019 11:53:38 AM

Processed by : System Administrator

## <Chromatogram>

mAU

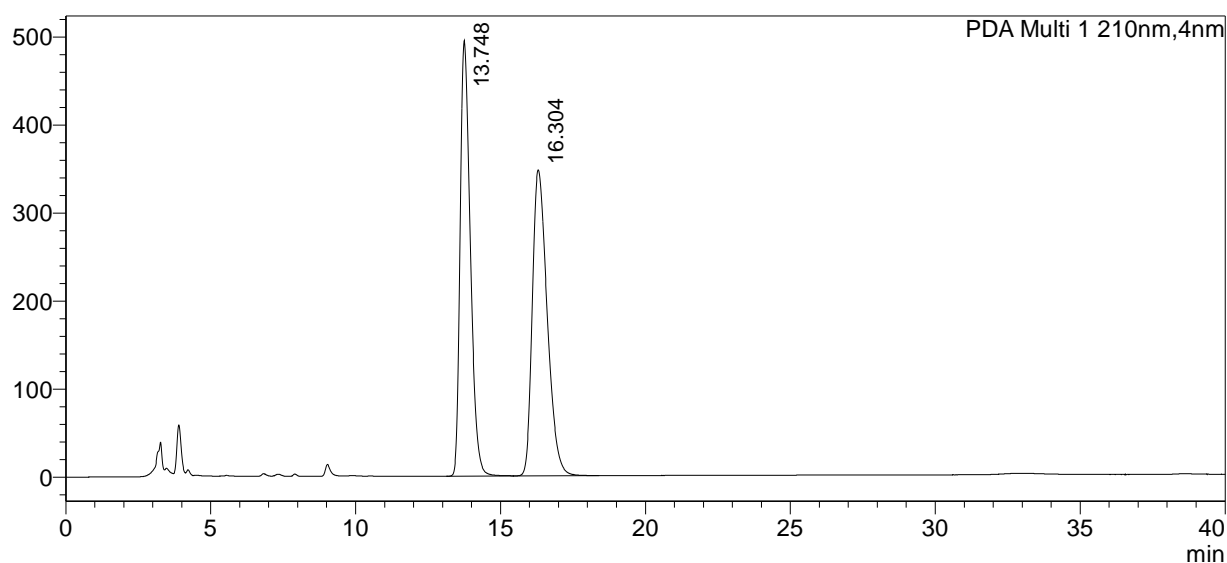

## <Peak Table>

PDA Ch1 210nm

| Peak# | Ret. Time | Area     | Height | Conc.  | Unit | Mark | Name |
|-------|-----------|----------|--------|--------|------|------|------|
| 1     | 13.748    | 12107636 | 495033 | 49.358 |      |      |      |
| 2     | 16.304    | 12422395 | 347484 | 50.642 |      | V    |      |
| Total |           | 24530031 | 842517 |        |      |      |      |

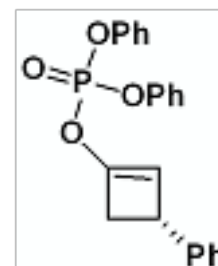

## <Sample Information>

Sample Name : wsw-1-30-1  
 Sample ID :  
 Data Filename : wsw-1-30-1.lcd

Method Filename : OJ-H;1 ml; 10% IPA in Hex;40 min.lcm

Batch Filename : zcx-8-81ac.lcb

Vial # : 1-31

Sample Type : Unknown

Injection Volume : 10 uL

Date Acquired : 8/28/2020 12:04:23 AM

Acquired by : System Administrator

Date Processed : 8/28/2020 12:44:26 AM

Processed by : System Administrator

## <Chromatogram>

mAU

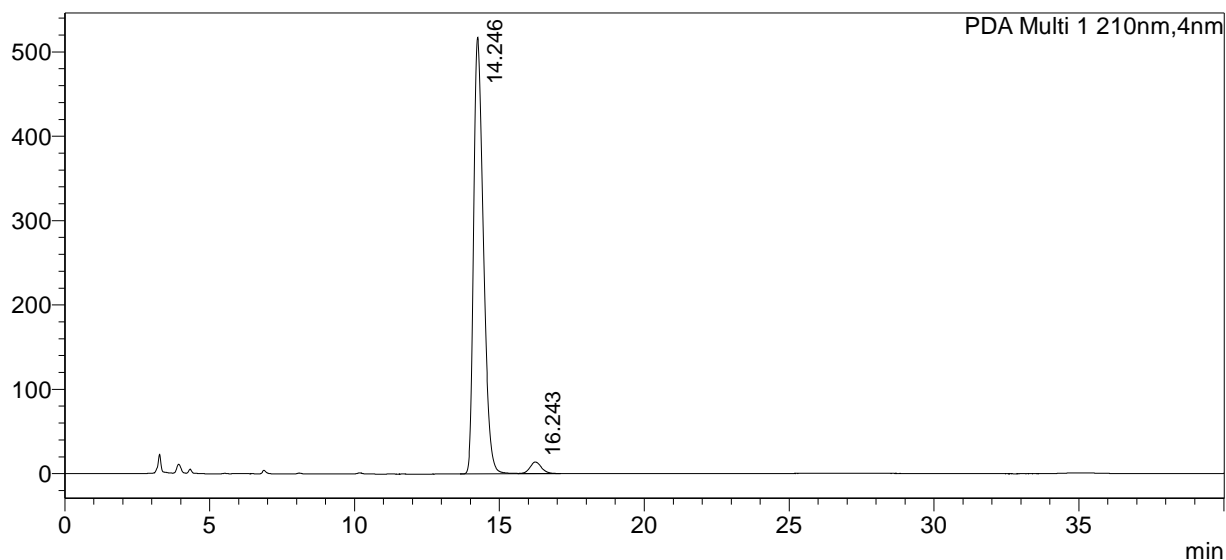

## <Peak Table>

PDA Ch1 210nm

| Peak# | Ret. Time | Area     | Height | Conc.  | Unit | Mark | Name |
|-------|-----------|----------|--------|--------|------|------|------|
| 1     | 14.246    | 12194364 | 517584 | 97.061 |      | S    |      |
| 2     | 16.243    | 369253   | 13558  | 2.939  |      | T    |      |
| Total |           | 12563617 | 531141 |        |      |      |      |

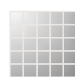SHIMADZU  
LabSolutions

## Analysis Report

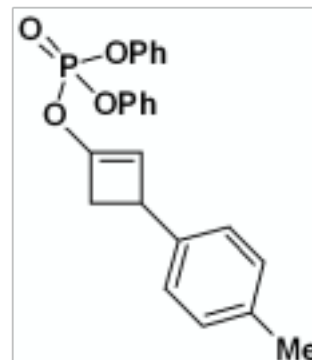

## &lt;Sample Information&gt;

Sample Name : w-1-8-1-1 ODH 5%  
 Sample ID :  
 Data Filename : w-1-8-1-1 ODH 5%.lcd  
  
 Method Filename : OD-H,1ml 5%IPA in Hex;40min.lcm  
 Batch Filename : ZJ-1-89.lcb  
 Vial # : 1-16  
 Injection Volume : 10 uL  
 Date Acquired : 9/4/2020 11:31:31 PM  
 Date Processed : 9/5/2020 12:11:34 AM

Sample Type : Unknown  
 Acquired by : System Administrator  
 Processed by : System Administrator

## &lt;Chromatogram&gt;

mAU

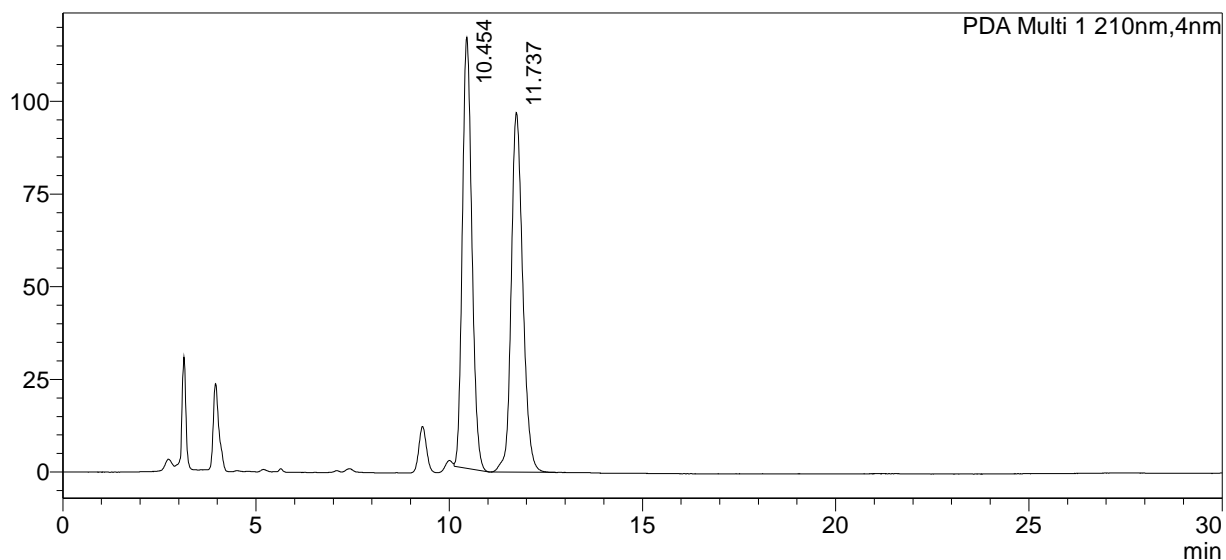

## &lt;Peak Table&gt;

PDA Ch1 210nm

| Peak# | Ret. Time | Area    | Height | Conc.  | Unit | Mark | Name |
|-------|-----------|---------|--------|--------|------|------|------|
| 1     | 10.454    | 1997289 | 116284 | 49.741 |      |      |      |
| 2     | 11.737    | 2018088 | 97032  | 50.259 |      |      |      |
| Total |           | 4015376 | 213316 |        |      |      |      |

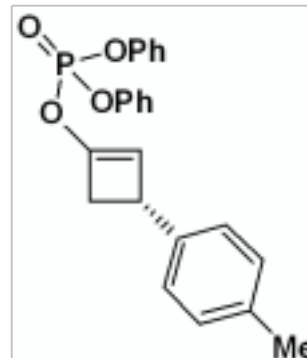

## <Sample Information>

Sample Name : w-1-37-2-1 ODH 5%  
 Sample ID :  
 Data Filename : w-1-37-2-1 ODH 5%.lcd

Method Filename : OD-H,1ml 5%IPA in Hex;40min.lcm  
 Batch Filename : ZJ-1-89.lcb  
 Vial # : 1-17  
 Injection Volume : 10 uL  
 Date Acquired : 9/5/2020 12:12:04 AM  
 Date Processed : 9/5/2020 12:52:08 AM

Sample Type : Unknown  
 Acquired by : System Administrator  
 Processed by : System Administrator

## <Chromatogram>

mAU

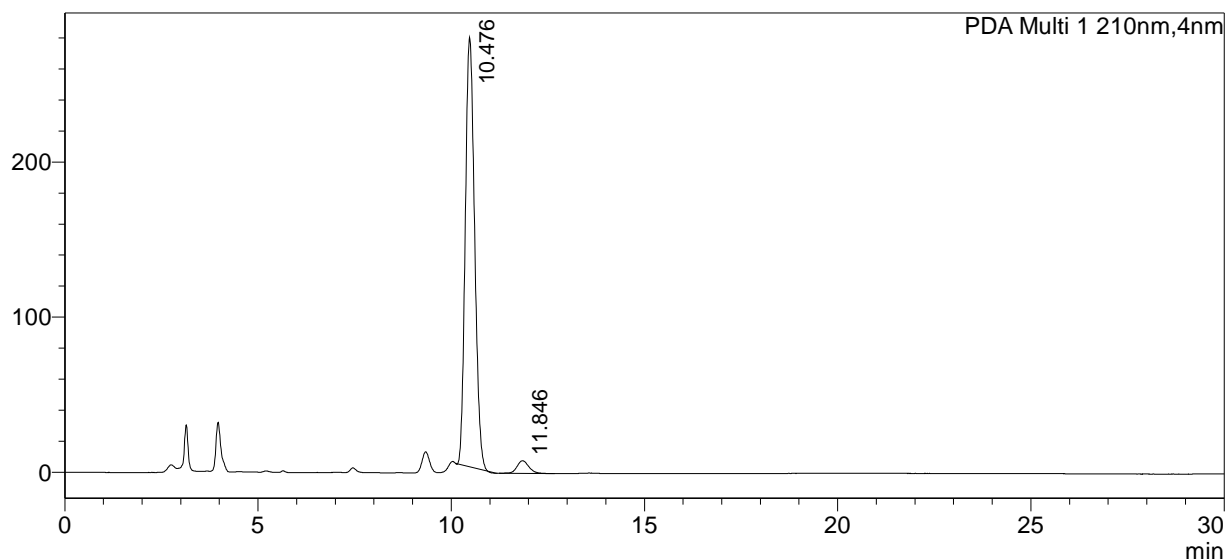

## <Peak Table>

PDA Ch1 210nm

| Peak# | Ret. Time | Area    | Height | Conc.  | Unit | Mark | Name |
|-------|-----------|---------|--------|--------|------|------|------|
| 1     | 10.476    | 4645956 | 276892 | 96.405 |      |      |      |
| 2     | 11.846    | 173227  | 8152   | 3.595  |      |      |      |
| Total |           | 4819183 | 285044 |        |      |      |      |

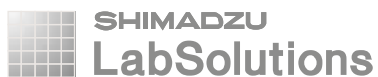

# Analysis Report

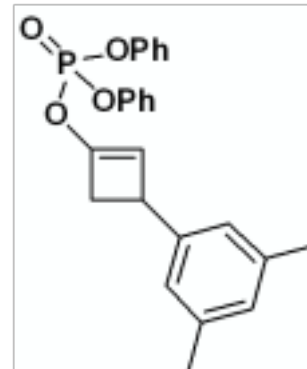

## <Sample Information>

Sample Name : w-1-55-1 ojh 10%  
 Sample ID :  
 Data Filename : w-1-55-1 ojh 10%.lcd  
  
 Method Filename : OJ-H;1 ml; 10% IPA in Hex; 40 min.lcm  
 Batch Filename : w-1-55-1  
 Vial # : 1-4  
 Injection Volume : 10 uL  
 Date Acquired : 10/16/2020 1:45:39 AM  
 Date Processed : 10/16/2020 2:25:41 AM  
  
 Sample Type : Unknown  
 Acquired by : System Administrator  
 Processed by : System Administrator

## <Chromatogram>

mAU

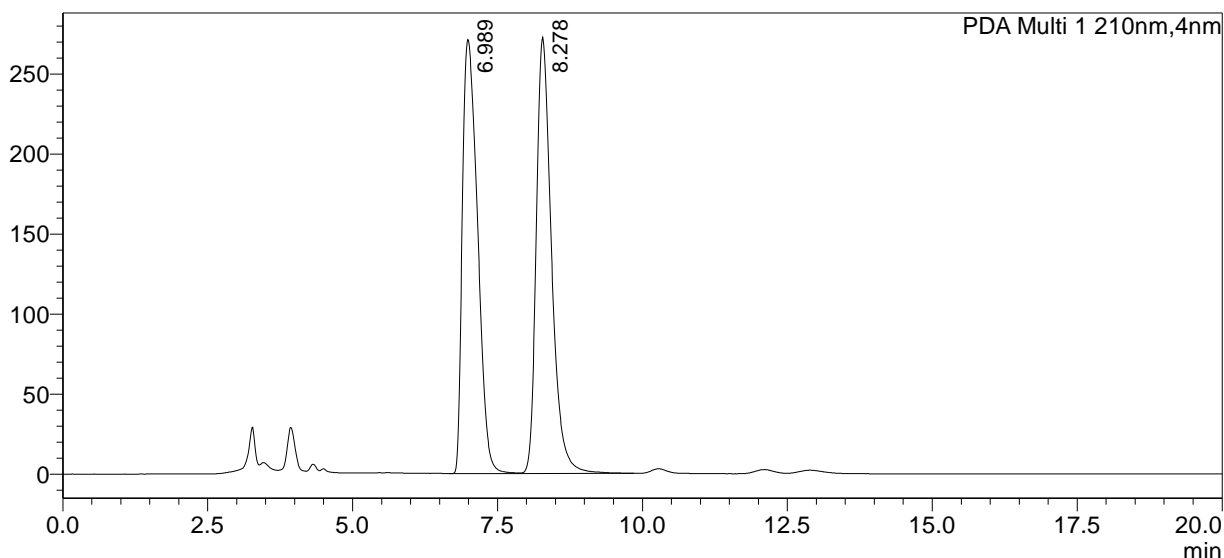

## <Peak Table>

PDA Ch1 210nm

| Peak# | Ret. Time | Area    | Height | Conc.  | Unit | Mark | Name |
|-------|-----------|---------|--------|--------|------|------|------|
| 1     | 6.989     | 4957619 | 271180 | 49.880 |      |      |      |
| 2     | 8.278     | 4981525 | 272479 | 50.120 |      | V    |      |
| Total |           | 9939144 | 543658 |        |      |      |      |

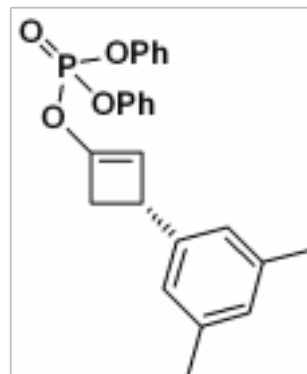

## <Sample Information>

Sample Name : w-1-58-2 ojh 10%  
 Sample ID :  
 Data Filename : w-1-58-2 ojh 10%.lcd

Method Filename : OJ-H;1 ml; 10% IPA in Hex; 20 min.lcm

Batch Filename : zcx-9-15ac.lcb

Vial # : 1-5

Sample Type : Unknown

Injection Volume : 10 uL

Date Acquired : 10/16/2020 6:17:41 PM

Acquired by : System Administrator

Date Processed : 10/16/2020 6:37:45 PM

Processed by : System Administrator

## <Chromatogram>

mAU

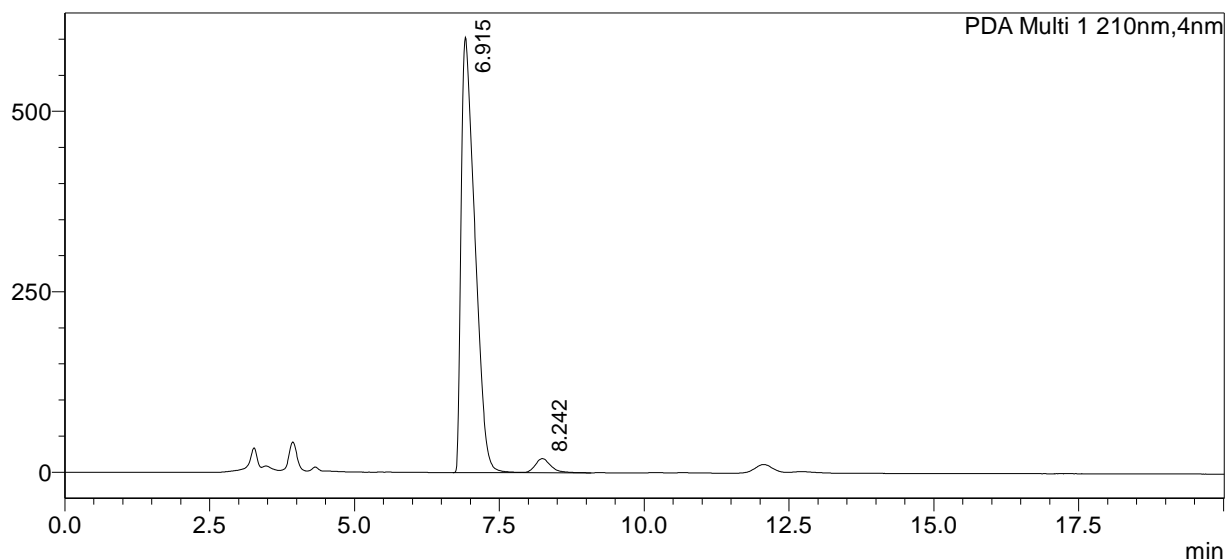

## <Peak Table>

PDA Ch1 210nm

| Peak# | Ret. Time | Area     | Height | Conc.  | Unit | Mark | Name |
|-------|-----------|----------|--------|--------|------|------|------|
| 1     | 6.915     | 9962642  | 603076 | 96.422 |      | V    |      |
| 2     | 8.242     | 369708   | 19590  | 3.578  |      | V    |      |
| Total |           | 10332350 | 622666 |        |      |      |      |

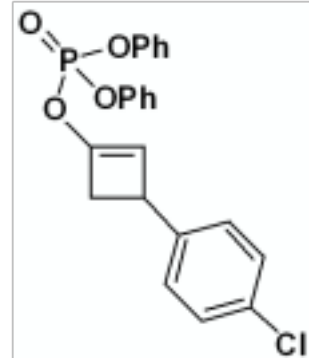

## <Sample Information>

Sample Name : wsw-1-10-1  
 Sample ID :  
 Data Filename : wsw-1-10-1.lcd

Method Filename : OJ-H;1 ml; 10% IPA in Hex;40 min.lcm  
 Batch Filename : zcx-8-81ac.lcb  
 Vial # : 1-32  
 Injection Volume : 10 uL  
 Date Acquired : 8/9/2020 6:34:39 AM  
 Date Processed : 8/9/2020 7:14:42 AM

Sample Type : Unknown  
 Acquired by : System Administrator  
 Processed by : System Administrator

## <Chromatogram>

mAU

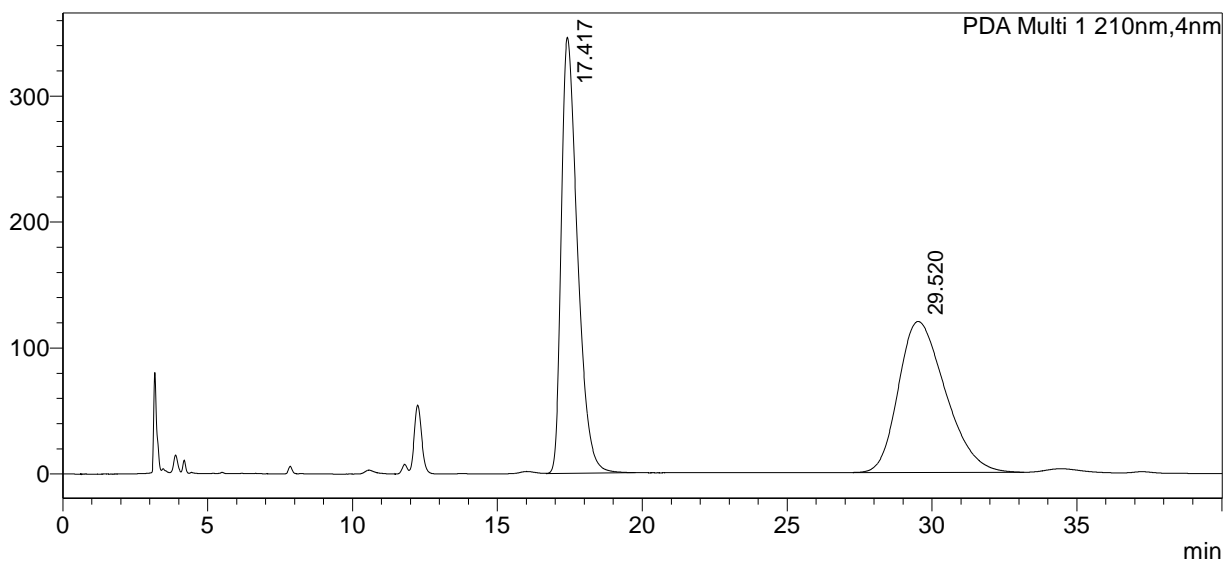

## <Peak Table>

PDA Ch1 210nm

| Peak# | Ret. Time | Area     | Height | Conc.  | Unit | Mark | Name |
|-------|-----------|----------|--------|--------|------|------|------|
| 1     | 17.417    | 13476708 | 346008 | 49.946 |      |      |      |
| 2     | 29.520    | 13505743 | 119847 | 50.054 |      |      |      |
| Total |           | 26982451 | 465855 |        |      |      |      |

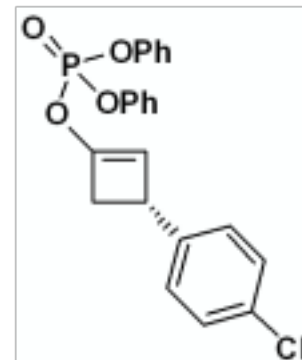

## <Sample Information>

Sample Name : w-1-38-2  
 Sample ID :  
 Data Filename : w-1-38-2.lcd

Method Filename : OJ-H;1 ml; 10% IPA in Hex; 40 min.lcm

Batch Filename : ZJ-1-89.lcb

Vial # : 1-3

Sample Type : Unknown

Injection Volume : 10 uL

Date Acquired : 9/4/2020 12:17:41 AM

Acquired by : System Administrator

Date Processed : 9/4/2020 12:57:43 AM

Processed by : System Administrator

## <Chromatogram>

mAU

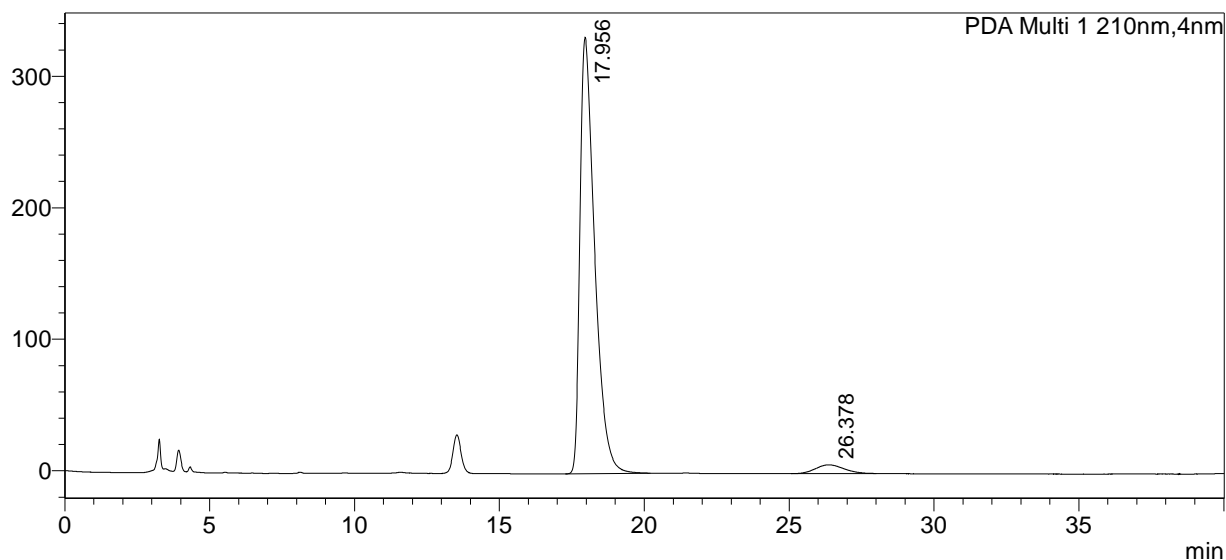

## <Peak Table>

PDA Ch1 210nm

| Peak# | Ret. Time | Area     | Height | Conc.  | Unit | Mark | Name |
|-------|-----------|----------|--------|--------|------|------|------|
| 1     | 17.956    | 11710884 | 331764 | 96.261 |      |      |      |
| 2     | 26.378    | 454938   | 6661   | 3.739  |      |      |      |
| Total |           | 12165822 | 338426 |        |      |      |      |



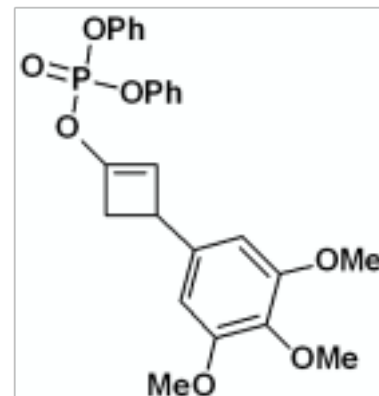

## <Sample Information>

Sample Name : wsw-1-7-1-1-1  
 Sample ID :  
 Data Filename : wsw-1-7-1-1-1.lcd

Method Filename : OZ-H;1 ml; 10% IPA in Hex; 80 min.lcm  
 Batch Filename : 1.lcb  
 Vial # : 1-92  
 Injection Volume : 10 uL  
 Date Acquired : 9/2/2020 8:26:32 AM  
 Date Processed : 9/2/2020 9:46:36 AM

Sample Type : Unknown  
 Acquired by : System Administrator  
 Processed by : System Administrator

## <Chromatogram>

mAU

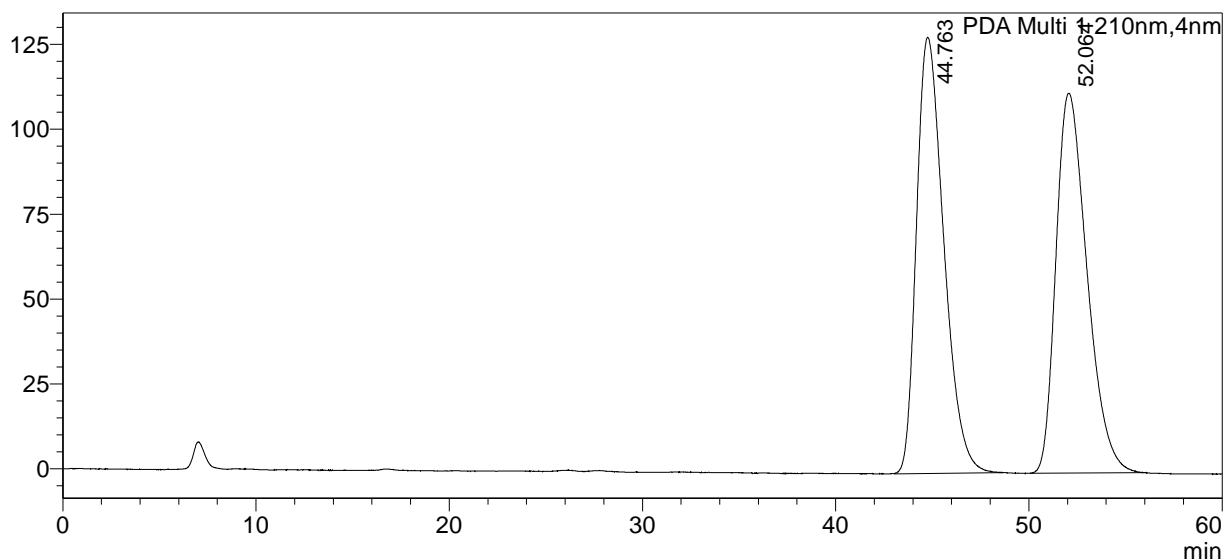

## <Peak Table>

PDA Ch1 210nm

| Peak# | Ret. Time | Area     | Height | Conc.  | Unit | Mark | Name |
|-------|-----------|----------|--------|--------|------|------|------|
| 1     | 44.763    | 12629993 | 128426 | 50.236 |      | S    |      |
| 2     | 52.064    | 12511376 | 111871 | 49.764 |      | S    |      |
| Total |           | 25141369 | 240296 |        |      |      |      |

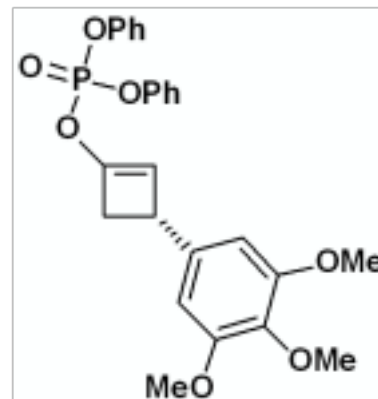

## <Sample Information>

Sample Name : zcx-4-93ac  
 Sample ID :  
 Data Filename : zcx-4-93ac001.lcd

Method Filename : OZ-H;1 ml; 10% IPA in Hex; 80 min.lcm  
 Batch Filename : 1.lcb  
 Vial # : 1-93  
 Injection Volume : 10 uL  
 Date Acquired : 9/1/2020 7:33:16 PM  
 Date Processed : 9/1/2020 8:53:20 PM

Sample Type : Unknown  
 Acquired by : System Administrator  
 Processed by : System Administrator

## <Chromatogram>

mAU

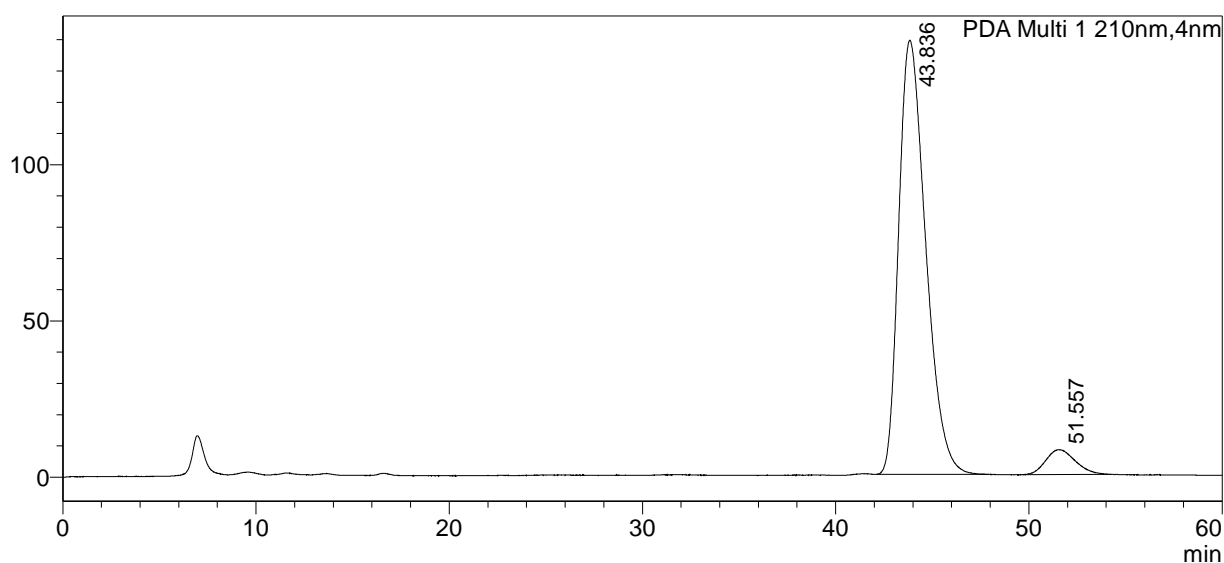

## <Peak Table>

PDA Ch1 210nm

| Peak# | Ret. Time | Area     | Height | Conc.  | Unit | Mark | Name |
|-------|-----------|----------|--------|--------|------|------|------|
| 1     | 43.836    | 13479704 | 138931 | 94.037 |      | SV   |      |
| 2     | 51.557    | 854720   | 7985   | 5.963  |      | S    |      |
| Total |           | 14334425 | 146915 |        |      |      |      |

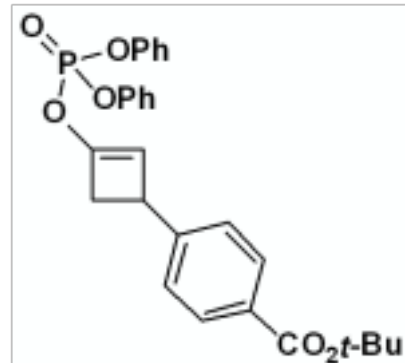

## <Sample Information>

Sample Name : zcx-9-15ac AD  
 Sample ID :  
 Data Filename : zcx-9-15ac AD.lcd

Method Filename : AD-H;1 ml; 20% IPA in Hex;40 min.lcm  
 Batch Filename : zcx-9-15ac.lcb  
 Vial # : 1-68  
 Injection Volume : 10 uL  
 Date Acquired : 10/13/2020 7:37:51 PM  
 Date Processed : 10/13/2020 8:17:54 PM

Sample Type : Unknown  
 Acquired by : System Administrator  
 Processed by : System Administrator

## <Chromatogram>

mAU

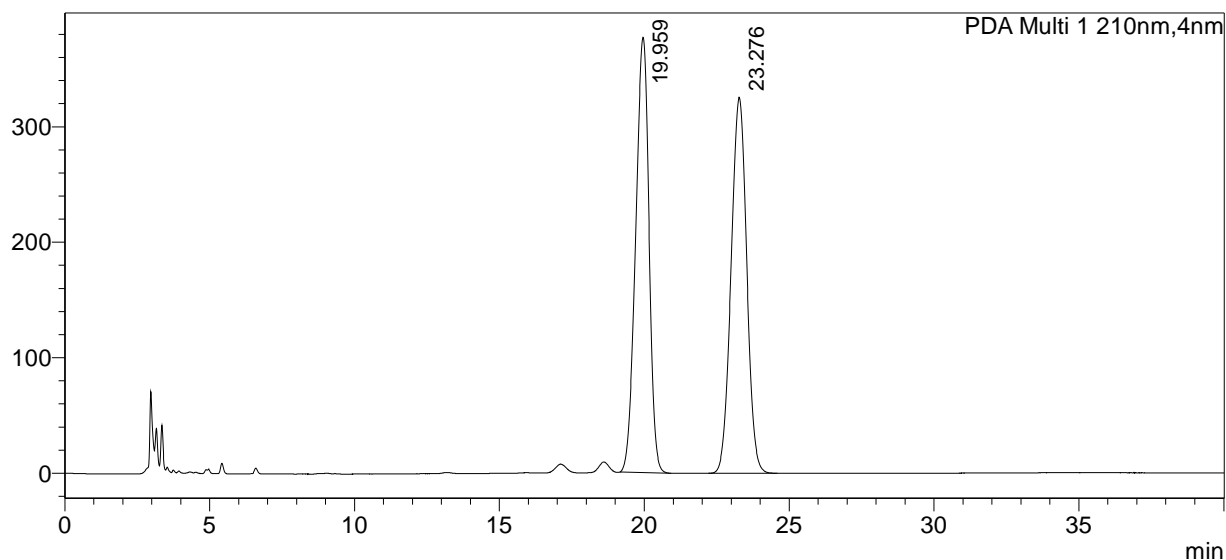

## <Peak Table>

PDA Ch1 210nm

| Peak# | Ret. Time | Area     | Height | Conc.  | Unit | Mark | Name |
|-------|-----------|----------|--------|--------|------|------|------|
| 1     | 19.959    | 12041382 | 376739 | 49.649 |      |      |      |
| 2     | 23.276    | 12211554 | 325618 | 50.351 |      |      |      |
| Total |           | 24252936 | 702356 |        |      |      |      |

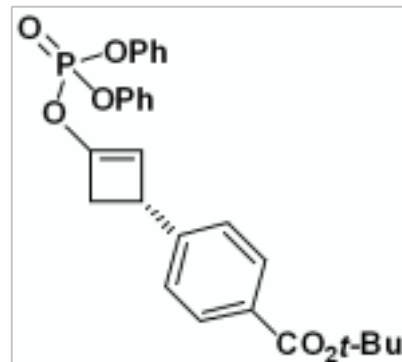

## <Sample Information>

Sample Name : zcx-9-23ac  
 Sample ID :  
 Data Filename : zcx-9-23ac001.lcd

Method Filename : AD-H;1 ml; 20% IPA in Hex;40 min.lcm  
 Batch Filename : zcx-9-15ac.lcb  
 Vial # : 1-18  
 Injection Volume : 10 uL  
 Date Acquired : 10/18/2020 9:41:15 AM  
 Date Processed : 10/18/2020 10:14:57 AM

Sample Type : Unknown  
 Acquired by : System Administrator  
 Processed by : System Administrator

## <Chromatogram>

mAU

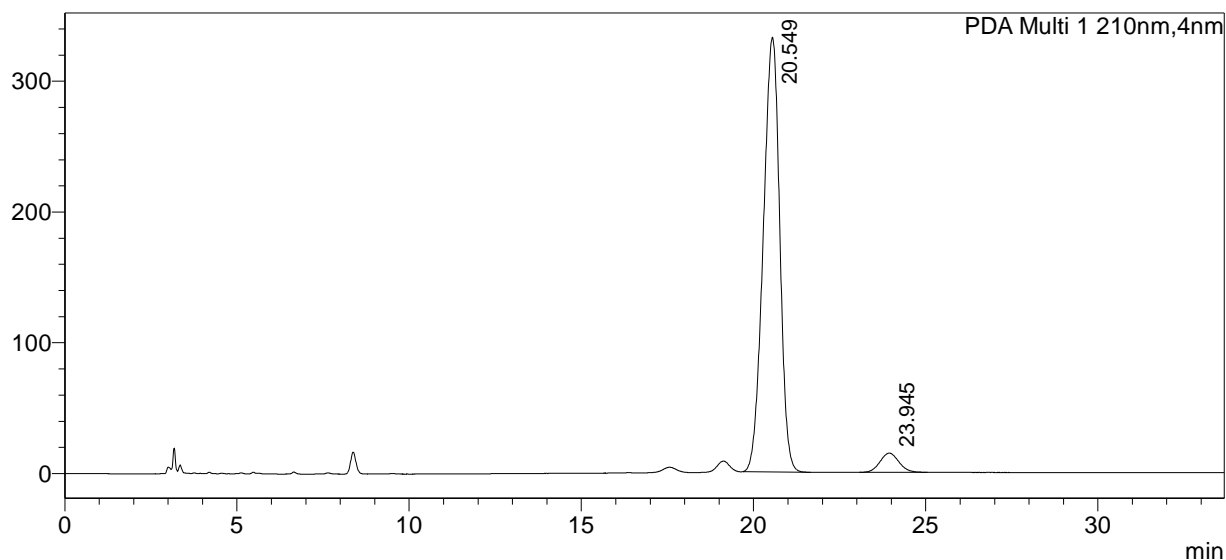

## <Peak Table>

PDA Ch1 210nm

| Peak# | Ret. Time | Area     | Height | Conc.  | Unit | Mark | Name |
|-------|-----------|----------|--------|--------|------|------|------|
| 1     | 20.549    | 11044940 | 332257 | 95.178 |      |      |      |
| 2     | 23.945    | 559557   | 14701  | 4.822  |      |      |      |
| Total |           | 11604496 | 346958 |        |      |      |      |

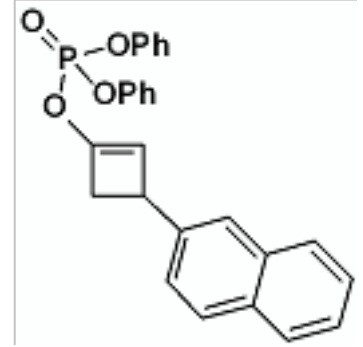

## <Sample Information>

Sample Name : zcx-8-191ac  
 Sample ID :  
 Data Filename : zcx-8-191ac002.lcd

Method Filename : OJ-H;1 ml; 40% IPA in Hex;50 min.lcm  
 Batch Filename : zcx-8-188ac.lcb  
 Vial # : 1-5  
 Injection Volume : 10 uL  
 Date Acquired : 10/4/2020 6:51:14 PM  
 Date Processed : 10/4/2020 7:41:17 PM

Sample Type : Unknown  
 Acquired by : System Administrator  
 Processed by : System Administrator

## <Chromatogram>

mAU

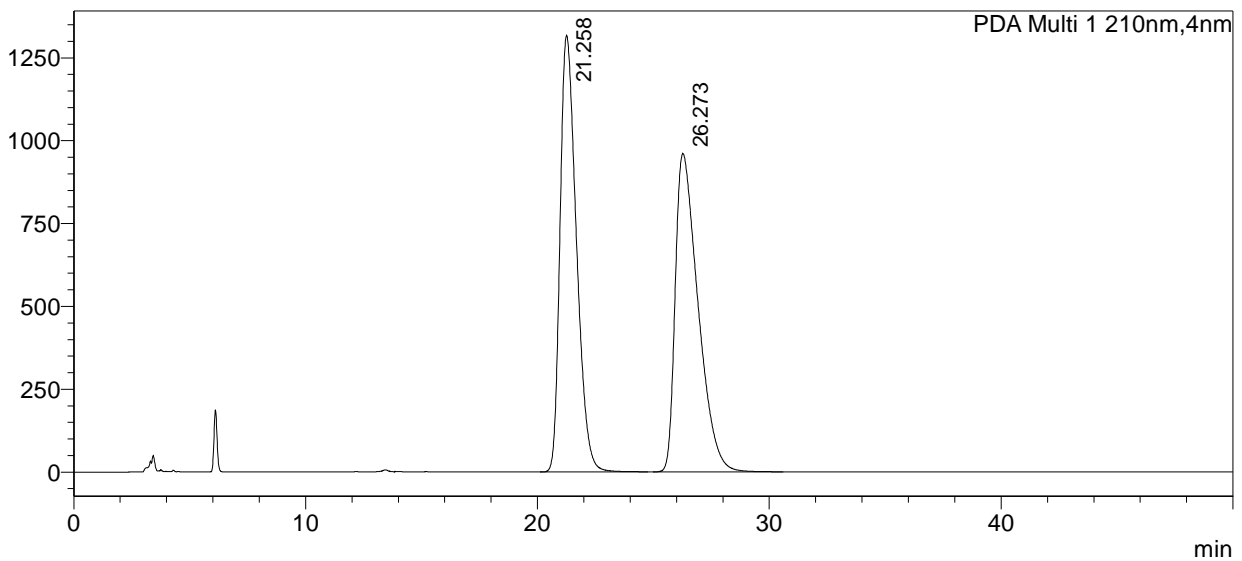

## <Peak Table>

PDA Ch1 210nm

| Peak# | Ret. Time | Area      | Height  | Conc.  | Unit | Mark | Name |
|-------|-----------|-----------|---------|--------|------|------|------|
| 1     | 21.258    | 64609006  | 1317358 | 49.626 |      |      |      |
| 2     | 26.273    | 65582178  | 960549  | 50.374 |      | S    |      |
| Total |           | 130191184 | 2277907 |        |      |      |      |

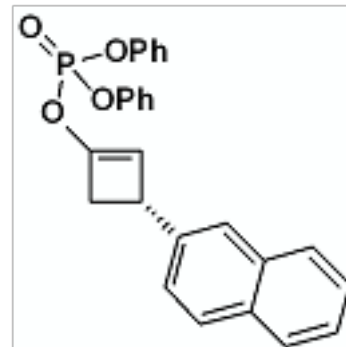

## <Sample Information>

Sample Name : zcx-8-193ac  
 Sample ID :  
 Data Filename : zcx-8-193ac002.lcd

Method Filename : OJ-H;1 ml; 40% IPA in Hex;50 min.lcm  
 Batch Filename : zcx-8-188ac.lcb  
 Vial # : 1-6  
 Injection Volume : 10 uL  
 Date Acquired : 10/4/2020 7:41:46 PM  
 Date Processed : 10/4/2020 8:31:49 PM

Sample Type : Unknown  
 Acquired by : System Administrator  
 Processed by : System Administrator

## <Chromatogram>

mAU

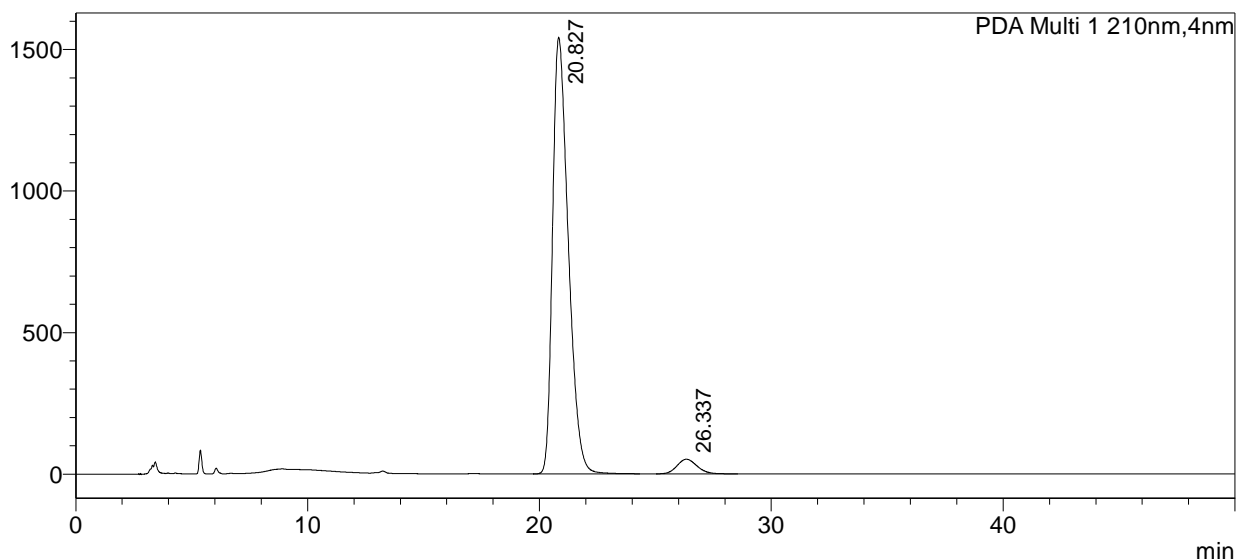

## <Peak Table>

PDA Ch1 210nm

| Peak# | Ret. Time | Area     | Height  | Conc.  | Unit | Mark | Name |
|-------|-----------|----------|---------|--------|------|------|------|
| 1     | 20.827    | 72777069 | 1541987 | 95.925 |      | S    |      |
| 2     | 26.337    | 3091792  | 51635   | 4.075  |      | S    |      |
| Total |           | 75868862 | 1593622 |        |      |      |      |

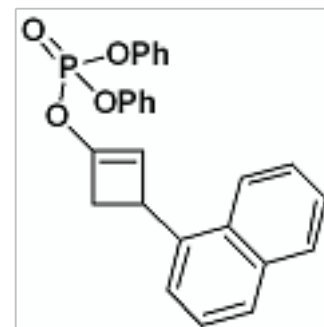

## <Sample Information>

Sample Name : w-1-54-1 odh 10%  
 Sample ID :  
 Data Filename : w-1-54-1 odh 10%.lcd

Method Filename : OD-H;1 ml; 10% IPA in Hex; 40 min.lcm  
 Batch Filename : w-1-54-1 odh  
 Vial # : 1-4  
 Injection Volume : 10 uL  
 Date Acquired : 10/11/2020 3:21:17 PM  
 Date Processed : 10/11/2020 4:01:20 PM

Sample Type : Unknown  
 Acquired by : System Administrator  
 Processed by : System Administrator

## <Chromatogram>

mAU

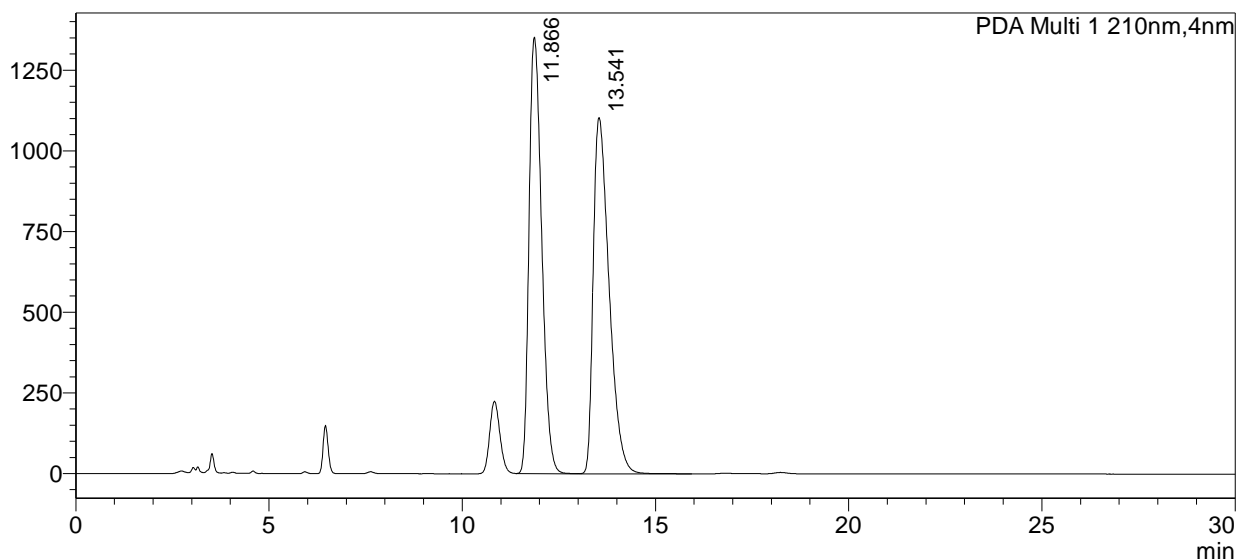

## <Peak Table>

PDA Ch1 210nm

| Peak# | Ret. Time | Area     | Height  | Conc.  | Unit | Mark | Name |
|-------|-----------|----------|---------|--------|------|------|------|
| 1     | 11.866    | 30859421 | 1351950 | 49.507 |      |      |      |
| 2     | 13.541    | 31473851 | 1103407 | 50.493 |      | V    |      |
| Total |           | 62333272 | 2455357 |        |      |      |      |

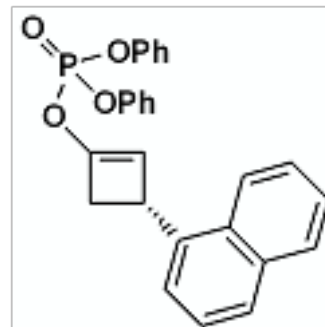

## <Sample Information>

Sample Name : w-1-56-1 odh  
 Sample ID :  
 Data Filename : w-1-56-1 odh.lcd

Method Filename : OD-H;1 ml; 10% IPA in Hex; 40 min.lcm  
 Batch Filename : w-1-56-1 odh  
 Vial # : 1-3  
 Injection Volume : 10 uL  
 Date Acquired : 10/16/2020 12:44:51 AM  
 Date Processed : 10/16/2020 1:24:53 AM

Sample Type : Unknown  
 Acquired by : System Administrator  
 Processed by : System Administrator

## <Chromatogram>

mAU

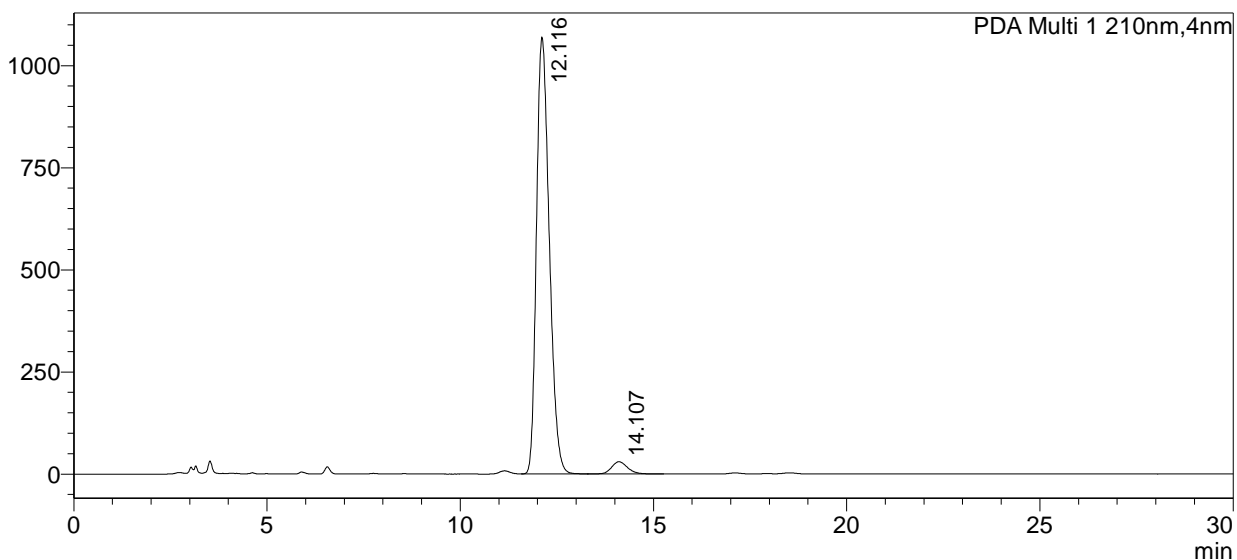

## <Peak Table>

PDA Ch1 210nm

| Peak# | Ret. Time | Area     | Height  | Conc.  | Unit | Mark | Name |
|-------|-----------|----------|---------|--------|------|------|------|
| 1     | 12.116    | 24623294 | 1069048 | 96.584 |      |      |      |
| 2     | 14.107    | 870853   | 29984   | 3.416  |      | V    |      |
| Total |           | 25494147 | 1099031 |        |      |      |      |



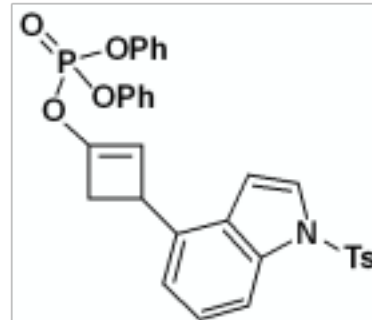

## <Sample Information>

Sample Name : zcx-9-19ac  
 Sample ID :  
 Data Filename : zcx-9-19ac.lcd

Method Filename : AD-H;1 ml; 40% IPA in Hex;60 min.lcm  
 Batch Filename : zcx-9-15ac.lcb  
 Vial # : 1-16  
 Injection Volume : 10 uL  
 Date Acquired : 10/19/2020 4:55:54 PM  
 Date Processed : 10/19/2020 5:55:53 PM

Sample Type : Unknown  
 Acquired by : System Administrator  
 Processed by : System Administrator

## <Chromatogram>

mAU

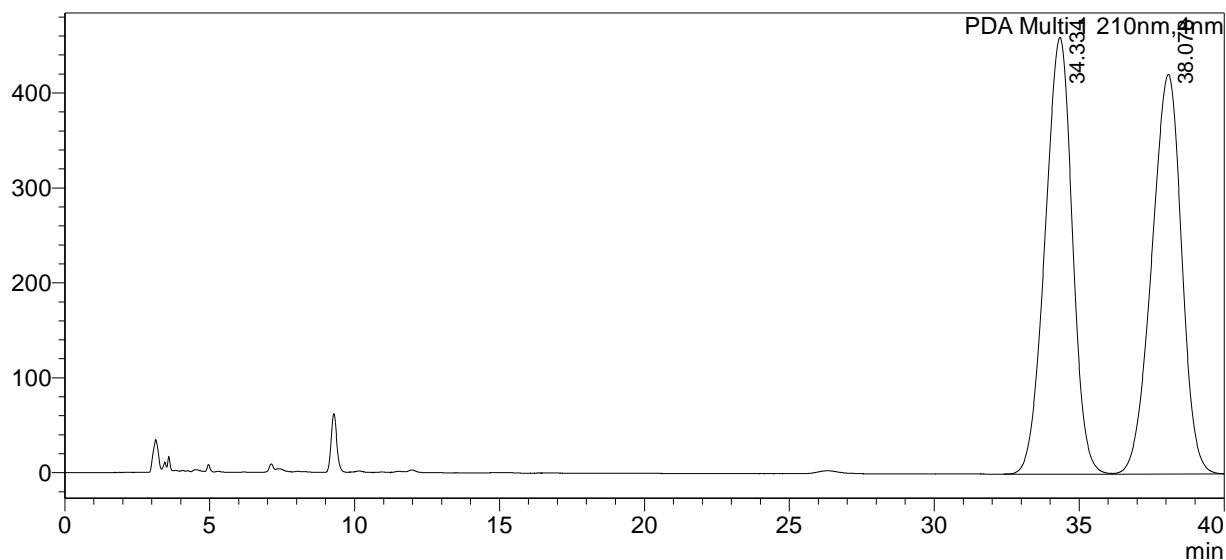

## <Peak Table>

PDA Ch1 210nm

| Peak# | Ret. Time | Area     | Height | Conc.  | Unit | Mark | Name |
|-------|-----------|----------|--------|--------|------|------|------|
| 1     | 34.334    | 30126377 | 460054 | 49.971 |      | V    |      |
| 2     | 38.078    | 30161860 | 421062 | 50.029 |      | SV   |      |
| Total |           | 60288236 | 881117 |        |      |      |      |

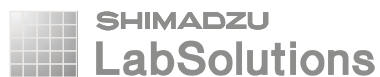

# Analysis Report

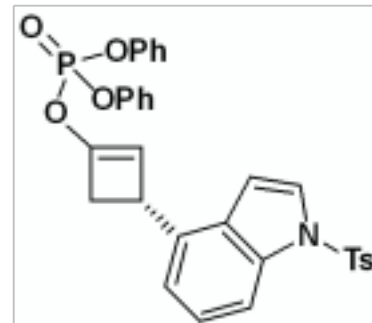

## <Sample Information>

Sample Name : zcx-9-24ac  
 Sample ID :  
 Data Filename : zcx-9-24ac001.lcd

Method Filename : AD-H;1 ml; 40% IPA in Hex;60 min.lcm  
 Batch Filename : zcx-9-15ac.lcb  
 Vial # : 1-20  
 Injection Volume : 10 uL  
 Date Acquired : 10/20/2020 12:31:00 AM  
 Date Processed : 10/20/2020 1:31:02 AM

Sample Type : Unknown  
 Acquired by : System Administrator  
 Processed by : System Administrator

## <Chromatogram>

mAU

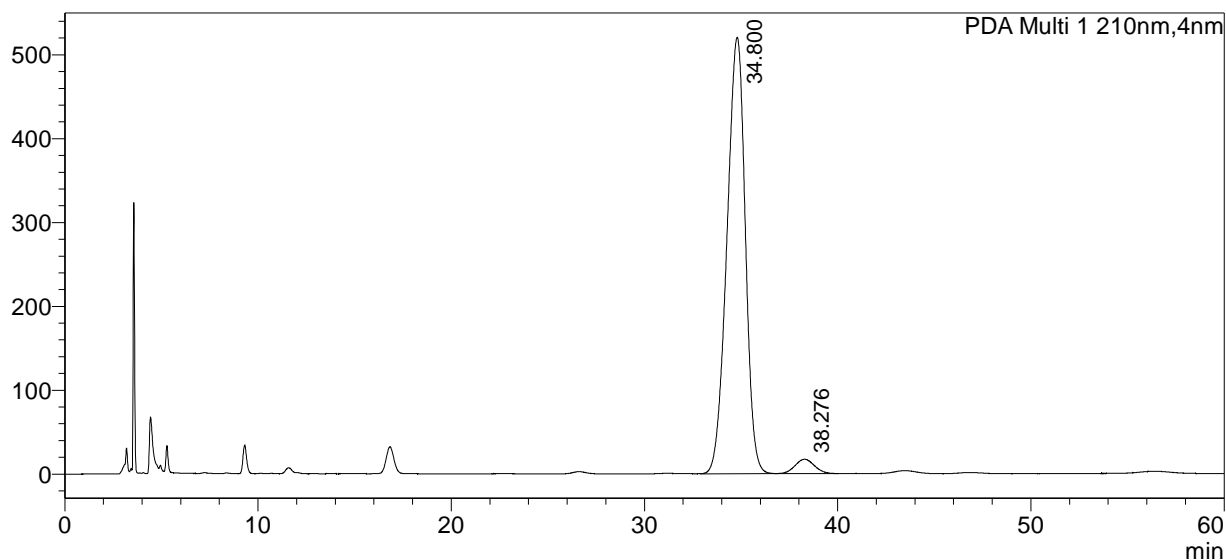

## <Peak Table>

PDA Ch1 210nm

| Peak# | Ret. Time | Area     | Height | Conc.  | Unit | Mark | Name |
|-------|-----------|----------|--------|--------|------|------|------|
| 1     | 34.800    | 34400277 | 520415 | 96.607 |      | V    |      |
| 2     | 38.276    | 1208091  | 17151  | 3.393  |      | V    |      |
| Total |           | 35608368 | 537565 |        |      |      |      |

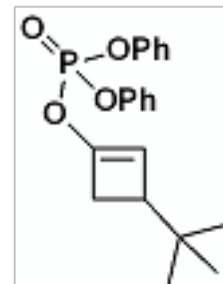

## <Sample Information>

Sample Name : zcx-8-190ac AD  
 Sample ID :  
 Data Filename : zcx-8-190ac AD.lcd

Method Filename : AD-H; 1 ml; 5%IPA in Hex; 40min.lcm

Batch Filename : zcx-8-188ac.lcb

Vial # : 1-65

Sample Type : Unknown

Injection Volume : 10 uL

Date Acquired : 10/5/2020 10:58:09 AM

Acquired by : System Administrator

Date Processed : 10/5/2020 11:38:12 AM

Processed by : System Administrator

## <Chromatogram>

mAU

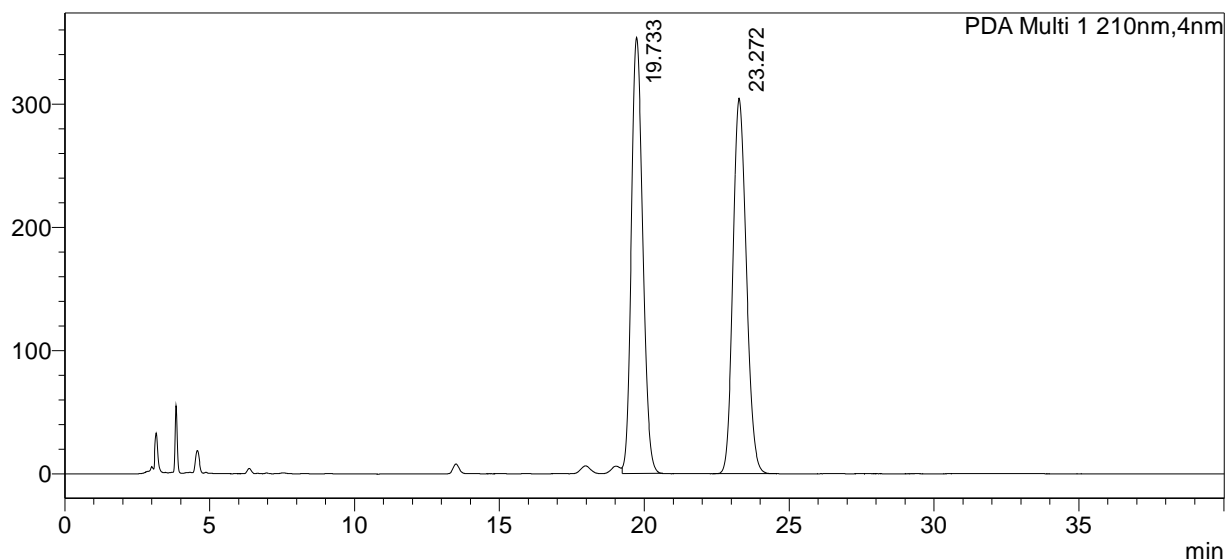

## <Peak Table>

PDA Ch1 210nm

| Peak# | Ret. Time | Area     | Height | Conc.  | Unit | Mark | Name |
|-------|-----------|----------|--------|--------|------|------|------|
| 1     | 19.733    | 9647918  | 353667 | 49.578 |      |      |      |
| 2     | 23.272    | 9812280  | 304598 | 50.422 |      |      |      |
| Total |           | 19460198 | 658265 |        |      |      |      |

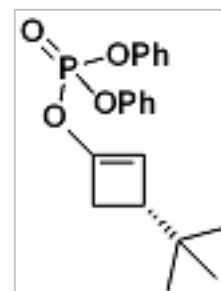

## <Sample Information>

Sample Name : zcx-8-194ac AD  
 Sample ID :  
 Data Filename : zcx-8-194ac AD.lcd

Method Filename : AD-H; 1 ml; 5%IPA in Hex; 40min.lcm

Batch Filename : zcx-8-188ac.lcb

Vial # : 1-66

Sample Type : Unknown

Injection Volume : 10 uL

Date Acquired : 10/5/2020 3:01:11 PM

Acquired by : System Administrator

Date Processed : 10/5/2020 3:41:13 PM

Processed by : System Administrator

## <Chromatogram>

mAU

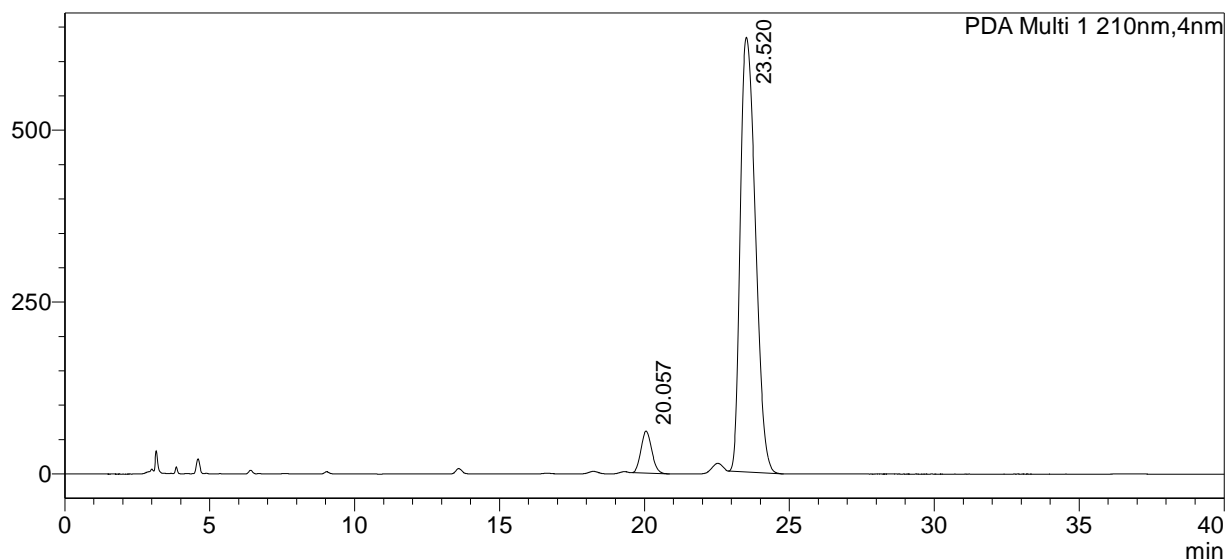

## <Peak Table>

PDA Ch1 210nm

| Peak# | Ret. Time | Area     | Height | Conc.  | Unit | Mark | Name |
|-------|-----------|----------|--------|--------|------|------|------|
| 1     | 20.057    | 1572259  | 60971  | 6.395  |      |      |      |
| 2     | 23.520    | 23013204 | 632321 | 93.605 |      |      |      |
| Total |           | 24585463 | 693291 |        |      |      |      |

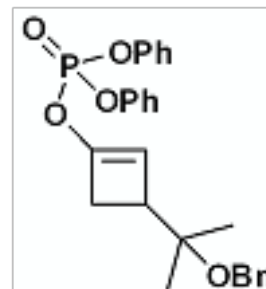

## <Sample Information>

Sample Name : w-1-61-1 odh 10%  
 Sample ID :  
 Data Filename : w-1-61-1 odh 10%.lcd

Method Filename : OD-H;1 ml; 10% IPA in Hex; 40 min.lcm  
 Batch Filename : zcx-9-15ac.lcb  
 Vial # : 1-1  
 Injection Volume : 10 uL  
 Date Acquired : 11/2/2020 6:00:05 PM  
 Date Processed : 11/2/2020 6:40:07 PM

Sample Type : Unknown  
 Acquired by : System Administrator  
 Processed by : System Administrator

## <Chromatogram>

mAU

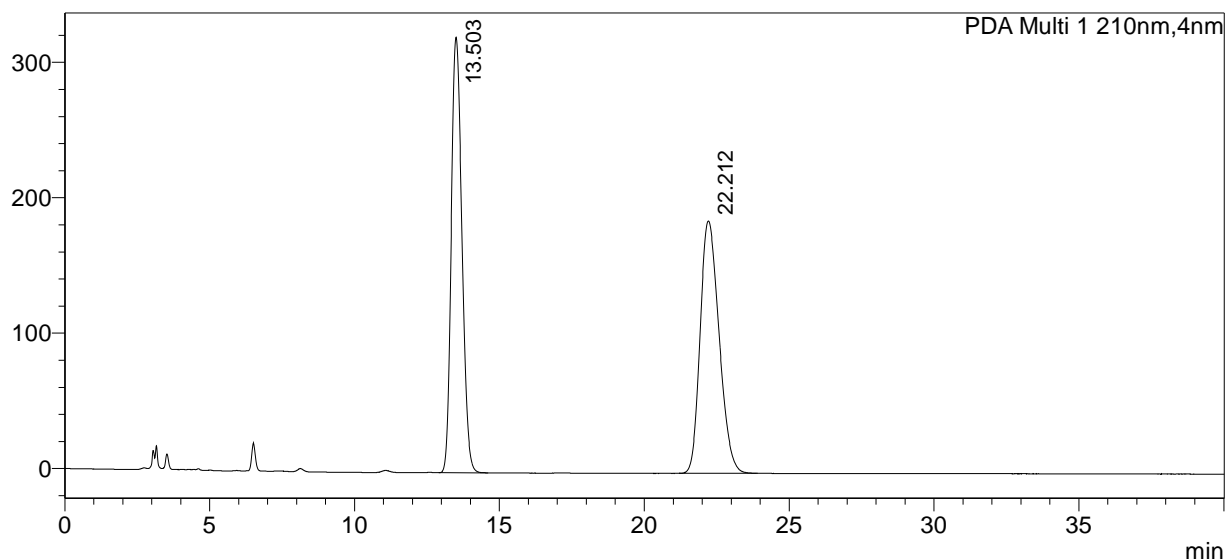

## <Peak Table>

PDA Ch1 210nm

| Peak# | Ret. Time | Area     | Height | Conc.  | Unit | Mark | Name |
|-------|-----------|----------|--------|--------|------|------|------|
| 1     | 13.503    | 8217860  | 321558 | 49.271 |      |      |      |
| 2     | 22.212    | 8461186  | 186389 | 50.729 |      |      |      |
| Total |           | 16679046 | 507947 |        |      |      |      |

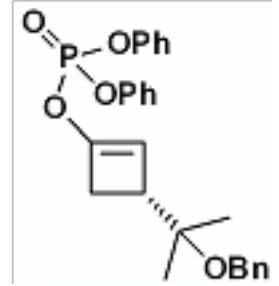

## <Sample Information>

Sample Name : w-1-64-1  
 Sample ID :  
 Data Filename : w-1-64-1.lcd

Method Filename : OD-H;1 ml; 10% IPA in Hex; 40 min.lcm  
 Batch Filename : zcx-9-15ac.lcb  
 Vial # : 1-2  
 Injection Volume : 10 uL  
 Date Acquired : 11/3/2020 3:02:41 PM  
 Date Processed : 11/3/2020 3:42:44 PM

Sample Type : Unknown  
 Acquired by : System Administrator  
 Processed by : System Administrator

## <Chromatogram>

mAU

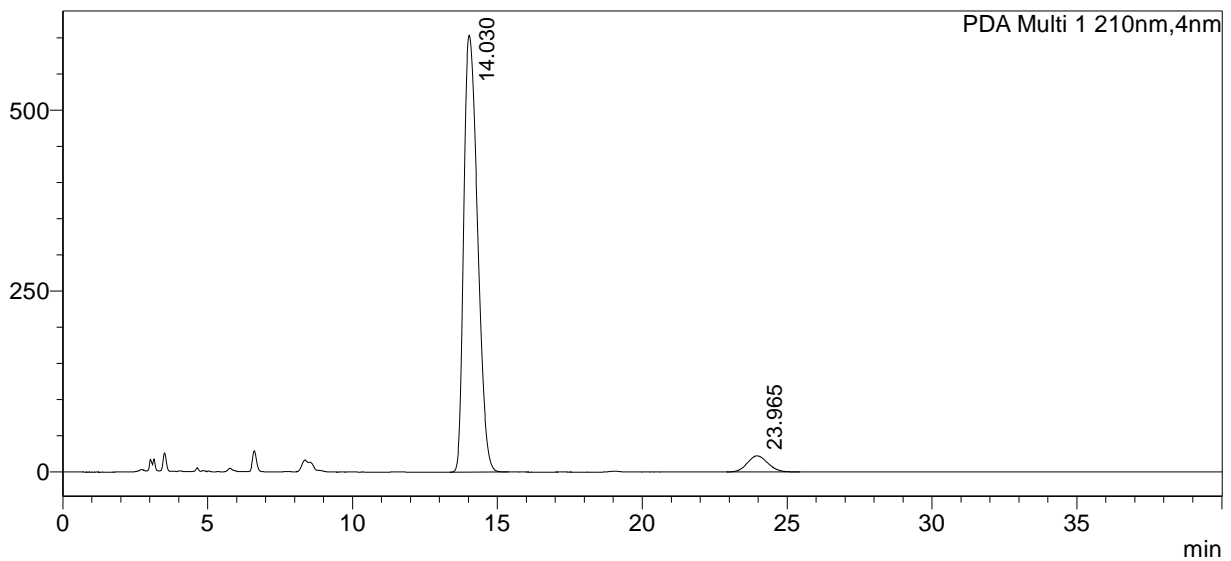

## <Peak Table>

PDA Ch1 210nm

| Peak# | Ret. Time | Area     | Height | Conc.  | Unit | Mark | Name |
|-------|-----------|----------|--------|--------|------|------|------|
| 1     | 14.030    | 20003424 | 603559 | 94.807 |      |      |      |
| 2     | 23.965    | 1095602  | 22214  | 5.193  |      | SV   |      |
| Total |           | 21099026 | 625773 |        |      |      |      |



# Analysis Report

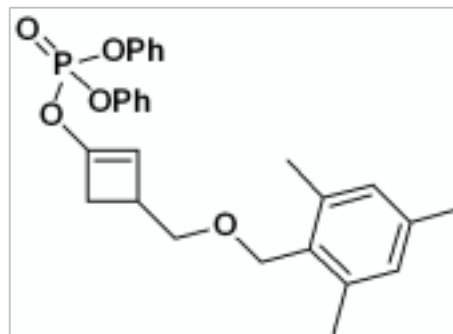

## <Sample Information>

Sample Name : w-1-53-1 ojh 10%  
 Sample ID :  
 Data Filename : w-1-53-1.lcd

Method Filename : OJ-H;1 ml; 10% IPA in Hex;40 min.lcm  
 Batch Filename : zcx-8-188ac.lcb  
 Vial # : 1-3  
 Injection Volume : 10 uL  
 Date Acquired : 10/10/2020 2:10:55 AM  
 Date Processed : 10/10/2020 2:50:58 AM

Sample Type : Unknown  
 Acquired by : System Administrator  
 Processed by : System Administrator

## <Chromatogram>

mAU

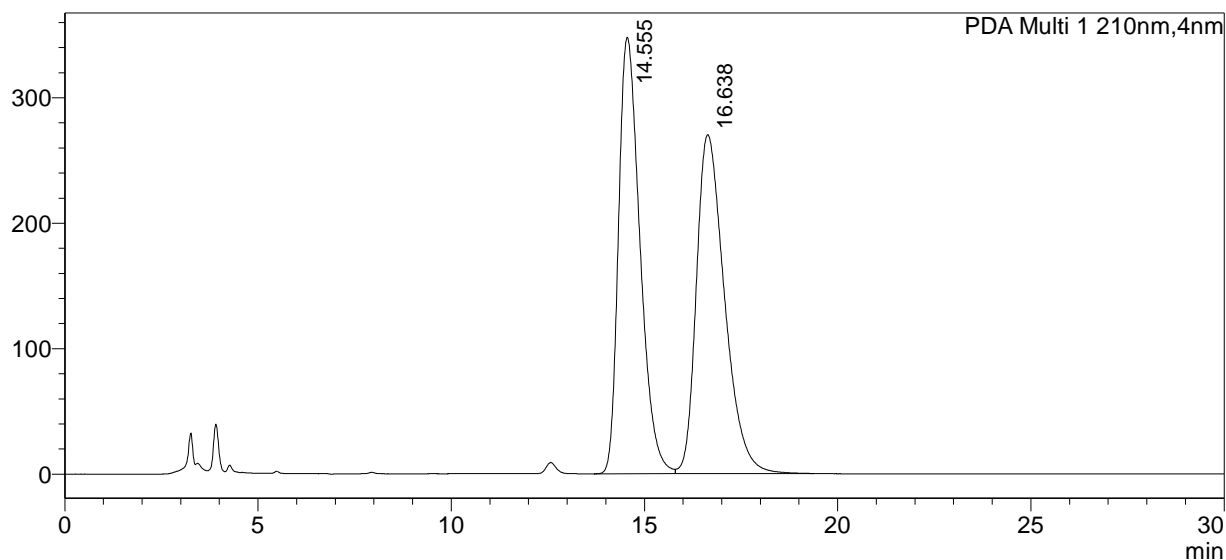

## <Peak Table>

PDA Ch1 210nm

| Peak# | Ret. Time | Area     | Height | Conc.  | Unit | Mark | Name |
|-------|-----------|----------|--------|--------|------|------|------|
| 1     | 14.555    | 13424563 | 347891 | 49.516 |      |      |      |
| 2     | 16.638    | 13686807 | 270219 | 50.484 |      | V    |      |
| Total |           | 27111370 | 618110 |        |      |      |      |

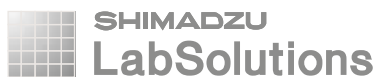

# Analysis Report

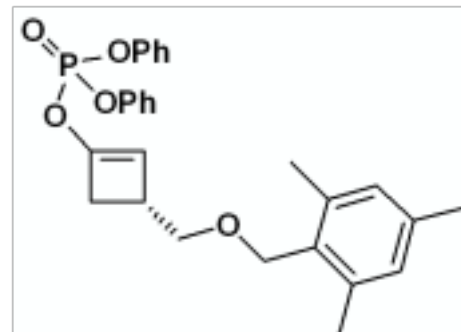

## <Sample Information>

Sample Name : w-1-52-1-1 ojh 10%  
 Sample ID :  
 Data Filename : w-1-52-1-1.lcd

Method Filename : OJ-H;1 ml; 10% IPA in Hex;40 min.lcm  
 Batch Filename : zcx-8-188ac.lcb  
 Vial # : 1-2  
 Injection Volume : 10 uL  
 Date Acquired : 10/10/2020 1:10:07 AM  
 Date Processed : 10/10/2020 1:50:10 AM

Sample Type : Unknown  
 Acquired by : System Administrator  
 Processed by : System Administrator

## <Chromatogram>

mAU

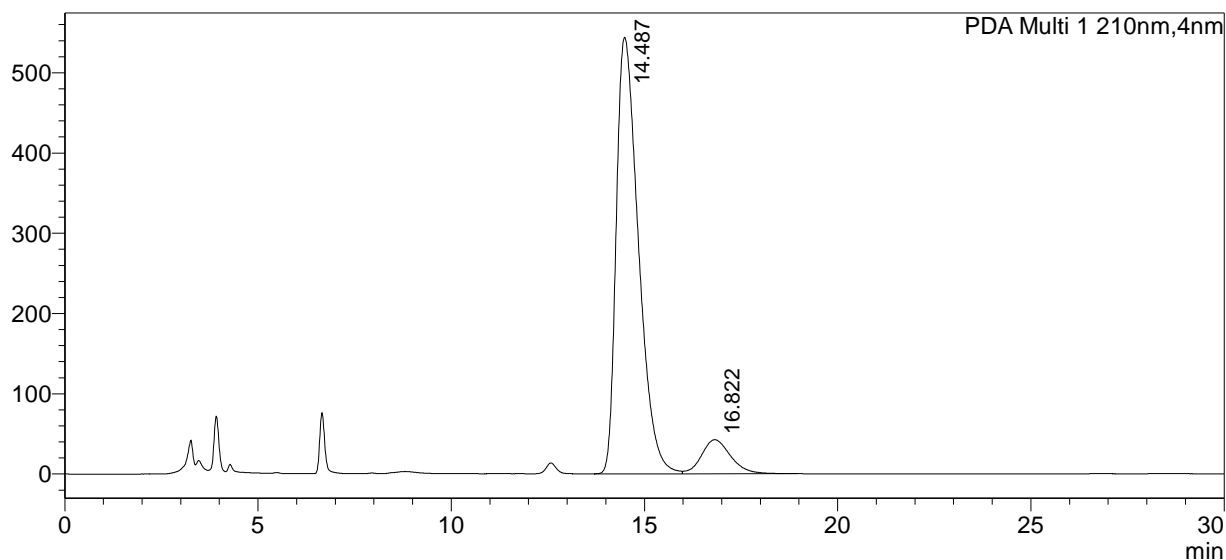

## <Peak Table>

PDA Ch1 210nm

| Peak# | Ret. Time | Area     | Height | Conc.  | Unit | Mark | Name |
|-------|-----------|----------|--------|--------|------|------|------|
| 1     | 14.487    | 21703620 | 543789 | 90.682 |      |      |      |
| 2     | 16.822    | 2230231  | 42434  | 9.318  |      | SV   |      |
| Total |           | 23933851 | 586223 |        |      |      |      |



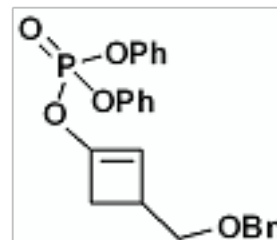

## <Sample Information>

Sample Name : wsw-1-24-1  
 Sample ID :  
 Data Filename : wsw-1-24-1-1.lcd

Method Filename : OJ-H;1 ml; 5% IPA in Hex;80 min.lcm  
 Batch Filename : zcx-8-81ac.lcb  
 Vial # : 1-1  
 Injection Volume : 10 uL  
 Date Acquired : 8/23/2020 10:56:41 AM  
 Date Processed : 8/23/2020 12:16:43 PM

Sample Type : Unknown  
 Acquired by : System Administrator  
 Processed by : System Administrator

## <Chromatogram>

mAU

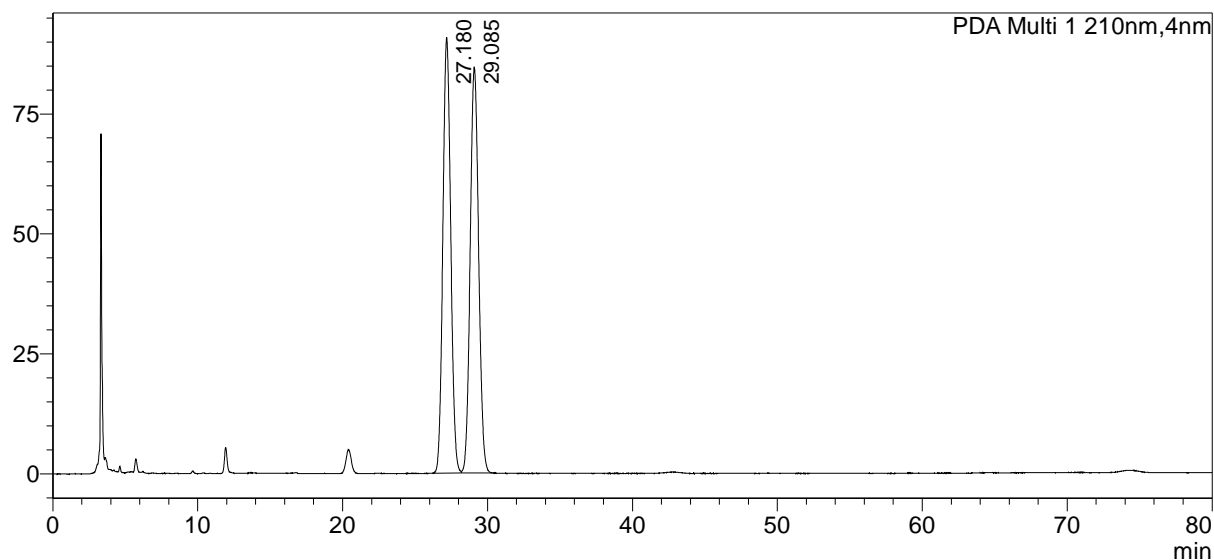

## <Peak Table>

PDA Ch1 210nm

| Peak# | Ret. Time | Area    | Height | Conc.  | Unit | Mark | Name |
|-------|-----------|---------|--------|--------|------|------|------|
| 1     | 27.180    | 3421314 | 90803  | 49.947 |      |      |      |
| 2     | 29.085    | 3428570 | 84642  | 50.053 |      | V    |      |
| Total |           | 6849884 | 175445 |        |      |      |      |

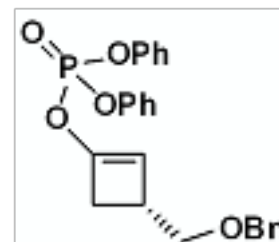

## <Sample Information>

Sample Name : w-1-31-2  
 Sample ID :  
 Data Filename : w-1-31-2.lcd

Method Filename : OJ-H;1 ml; 5% IPA in Hex;80 min.lcm  
 Batch Filename : zcx-8-81ac.lcb  
 Vial # : 1-63  
 Injection Volume : 10 uL  
 Date Acquired : 8/29/2020 7:30:09 PM  
 Date Processed : 8/29/2020 8:50:12 PM

Sample Type : Unknown  
 Acquired by : System Administrator  
 Processed by : System Administrator

## <Chromatogram>

mAU

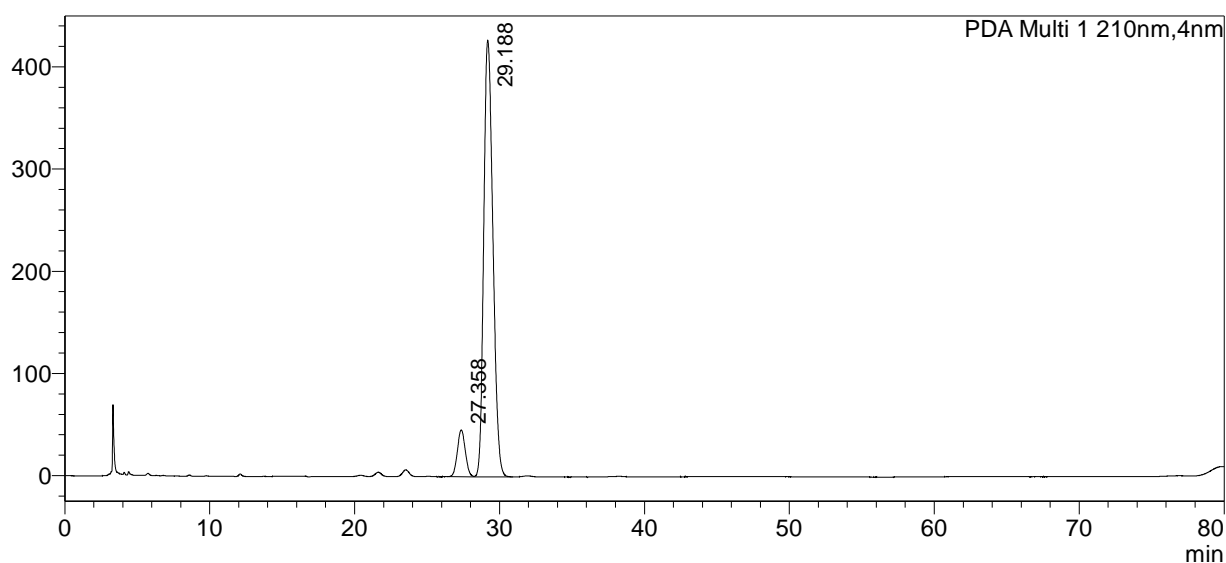

## <Peak Table>

PDA Ch1 210nm

| Peak# | Ret. Time | Area     | Height | Conc.  | Unit | Mark | Name |
|-------|-----------|----------|--------|--------|------|------|------|
| 1     | 27.358    | 1748461  | 45780  | 8.506  |      |      |      |
| 2     | 29.188    | 18807982 | 426953 | 91.494 |      | V    |      |
| Total |           | 20556443 | 472733 |        |      |      |      |

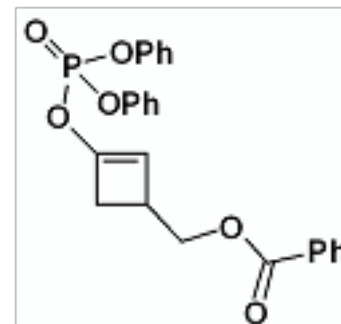

## <Sample Information>

Sample Name : zcx-4-86ac  
 Sample ID :  
 Data Filename : zcx-4-86ac002.lcd

Method Filename : OJ-H;1 ml; 10% IPA in Hex;70 min.lcm  
 Batch Filename : zcx-9-109.lcb  
 Vial # : 1-46  
 Injection Volume : 10 uL  
 Date Acquired : 12/28/2020 9:06:55 AM  
 Date Processed : 12/29/2020 8:45:28 AM

Sample Type : Unknown  
 Acquired by : System Administrator  
 Processed by : System Administrator

## <Chromatogram>

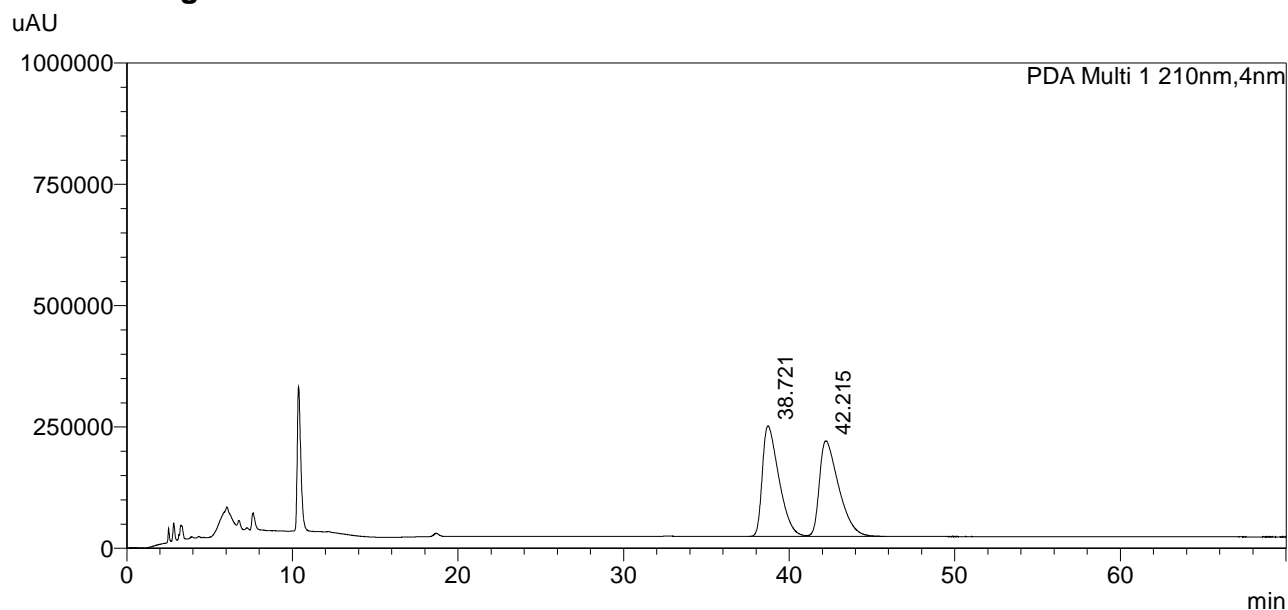

## <Peak Table>

PDA Ch1 210nm

| Peak# | Ret. Time | Area     | Height | Conc.  | Unit | Mark | Name |
|-------|-----------|----------|--------|--------|------|------|------|
| 1     | 38.721    | 15876765 | 227712 | 49.887 |      |      |      |
| 2     | 42.215    | 15948650 | 196861 | 50.113 |      | V    |      |
| Total |           | 31825415 | 424573 |        |      |      |      |

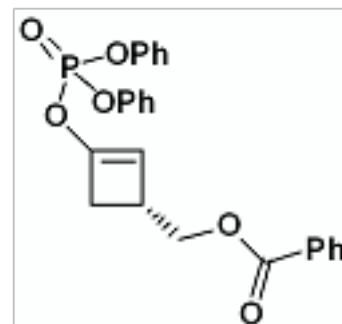

## <Sample Information>

Sample Name : zcx-9-152ac  
 Sample ID :  
 Data Filename : zcx-9-152ac.lcd

Method Filename : OJ-H;1 ml; 10% IPA in Hex;70 min.lcm  
 Batch Filename : zcx-9-109.lcb  
 Vial # : 1-47  
 Injection Volume : 10 uL  
 Date Acquired : 12/27/2020 3:44:23 PM  
 Date Processed : 12/27/2020 4:54:26 PM

Sample Type : Unknown  
 Acquired by : System Administrator  
 Processed by : System Administrator

## <Chromatogram>

mAU

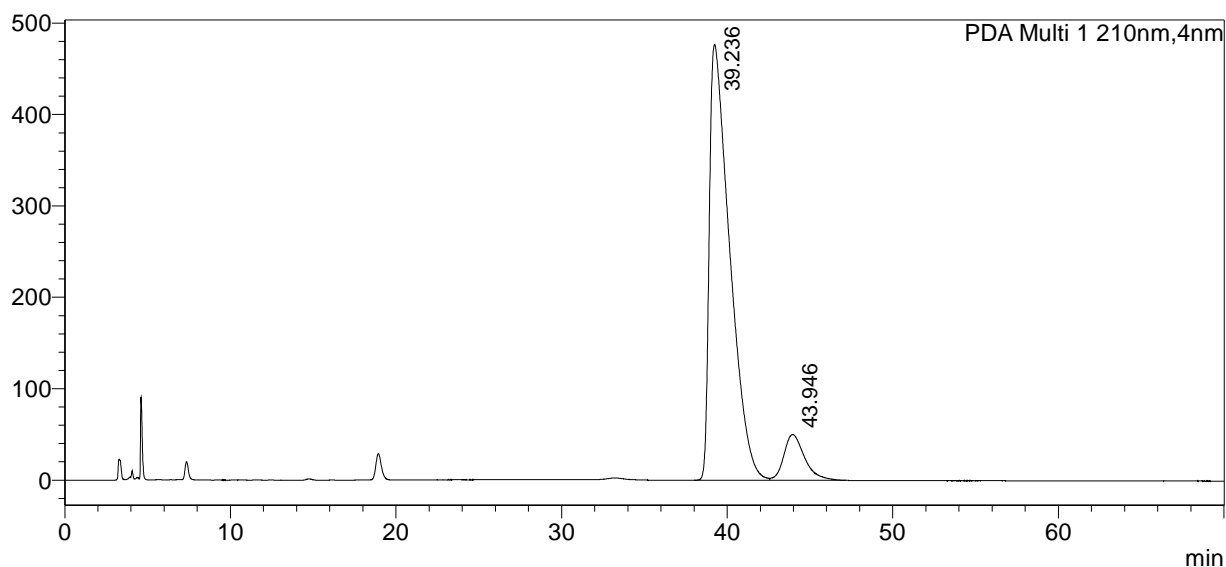

## <Peak Table>

PDA Ch1 210nm

| Peak# | Ret. Time | Area     | Height | Conc.  | Unit | Mark | Name |
|-------|-----------|----------|--------|--------|------|------|------|
| 1     | 39.236    | 40832720 | 476910 | 90.341 |      |      |      |
| 2     | 43.946    | 4365691  | 50065  | 9.659  |      | V    |      |
| Total |           | 45198411 | 526975 |        |      |      |      |

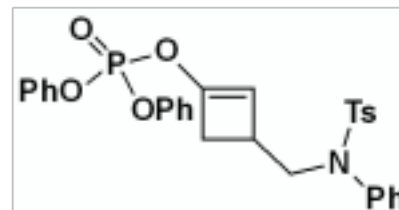

## <Sample Information>

Sample Name : zcx-2-140-1  
 Sample ID :  
 Data Filename : zcx-2-140-1-1.lcd

Method Filename : 6; IA;1ml;10% IPA in Hex;120 min.lcm  
 Batch Filename : 2.lcb  
 Vial # : 1-1  
 Injection Volume : 10 uL  
 Date Acquired : 12/5/2020 1:17:40 PM  
 Date Processed : 12/5/2020 3:17:42 PM

Sample Type : Unknown  
 Acquired by : System Administrator  
 Processed by : System Administrator

## <Chromatogram>

mAU

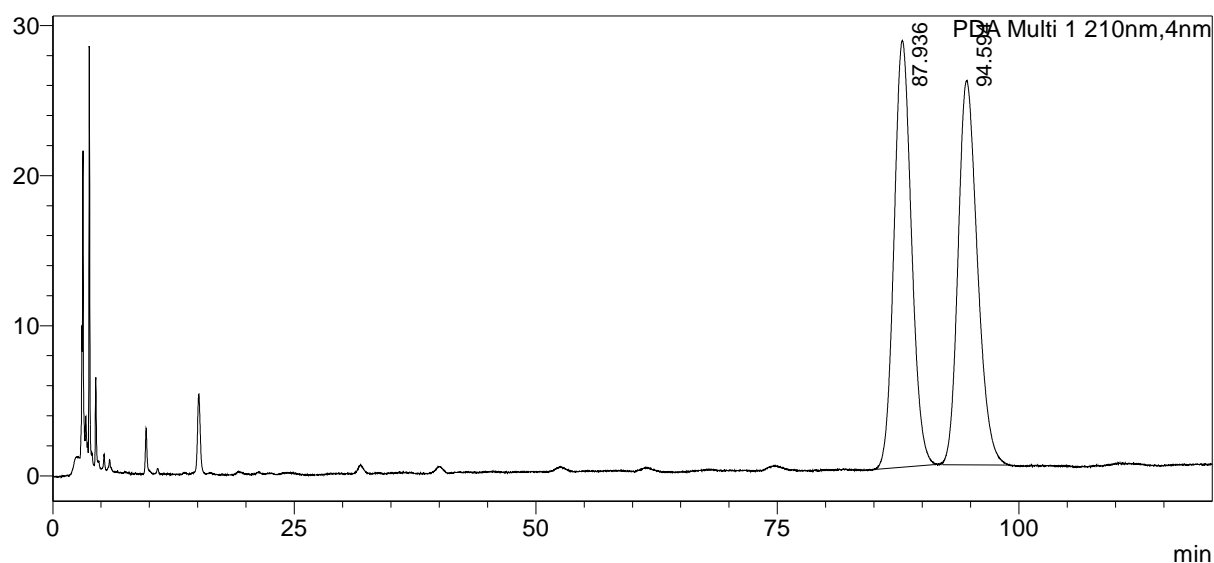

## <Peak Table>

PDA Ch1 210nm

| Peak# | Ret. Time | Area    | Height | Conc.  | Unit | Mark | Name |
|-------|-----------|---------|--------|--------|------|------|------|
| 1     | 87.936    | 3558876 | 28431  | 49.966 |      |      |      |
| 2     | 94.594    | 3563762 | 25600  | 50.034 |      | S    |      |
| Total |           | 7122637 | 54031  |        |      |      |      |

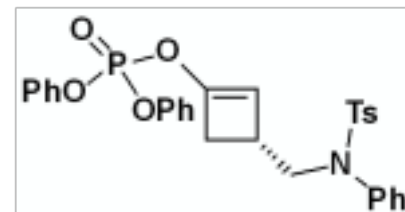

## <Sample Information>

Sample Name : w-1-87-1-1  
 Sample ID :  
 Data Filename : wsw-1-87-1-1.lcd

Method Filename : 6; IA;1ml;10% IPA in Hex;120 min.lcm

Batch Filename : 1.lcb

Vial # : 1-9

Injection Volume : 10 uL

Date Acquired : 12/4/2020 11:20:49 PM

Date Processed : 12/5/2020 1:20:52 AM

Sample Type : Unknown

Acquired by : System Administrator

Processed by : System Administrator

## <Chromatogram>

mAU

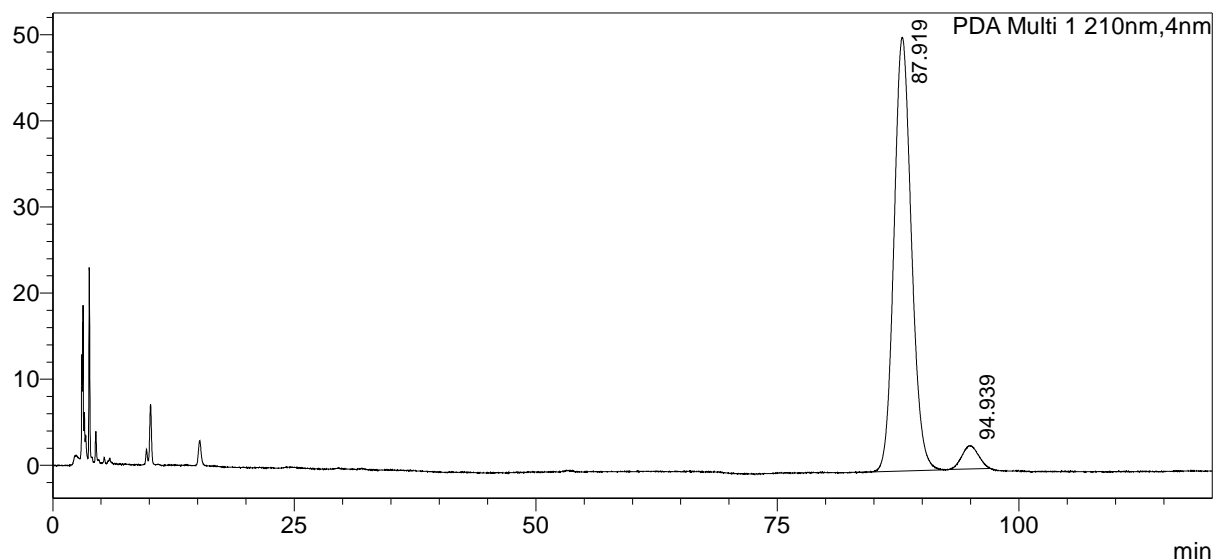

## <Peak Table>

PDA Ch1 210nm

| Peak# | Ret. Time | Area    | Height | Conc.  | Unit | Mark | Name |
|-------|-----------|---------|--------|--------|------|------|------|
| 1     | 87.919    | 6310280 | 50347  | 95.083 |      |      |      |
| 2     | 94.939    | 326354  | 2718   | 4.917  |      |      |      |
| Total |           | 6636633 | 53065  |        |      |      |      |

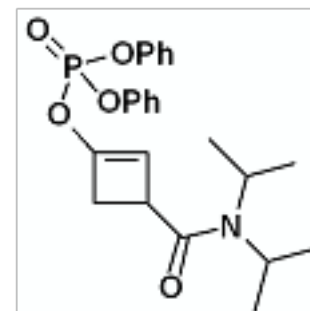

## <Sample Information>

Sample Name : wsw-1-69  
 Sample ID :  
 Data Filename : wsw-1-69.lcd

Method Filename : 6; IA;1ml;3% IPA in Hex;80 min.lcm  
 Batch Filename : 1.lcb  
 Vial # : 1-50  
 Injection Volume : 10 uL  
 Date Acquired : 11/9/2020 9:19:43 PM  
 Date Processed : 11/9/2020 10:39:46 PM

Sample Type : Unknown  
 Acquired by : System Administrator  
 Processed by : System Administrator

## <Chromatogram>

mAU

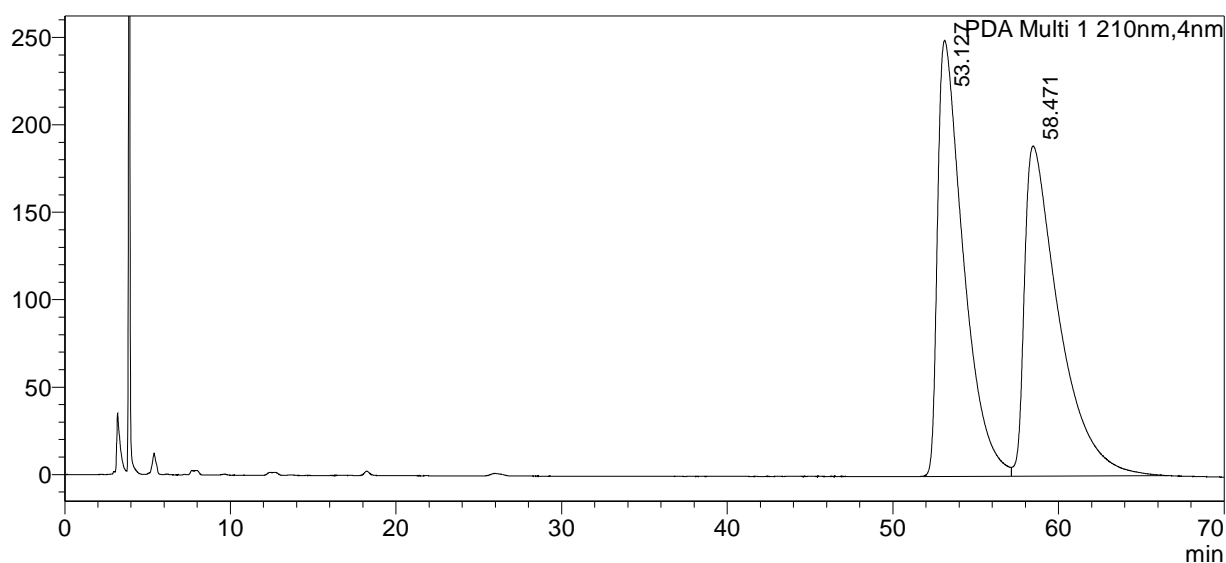

## <Peak Table>

PDA Ch1 210nm

| Peak# | Ret. Time | Area     | Height | Conc.  | Unit | Mark | Name |
|-------|-----------|----------|--------|--------|------|------|------|
| 1     | 53.127    | 27040812 | 249382 | 49.738 |      | V    |      |
| 2     | 58.471    | 27325658 | 188801 | 50.262 |      | SV   |      |
| Total |           | 54366470 | 438183 |        |      |      |      |

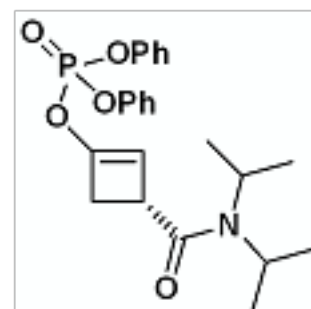

## <Sample Information>

Sample Name : zcx-9-50ac  
 Sample ID :  
 Data Filename : zcx-9-50ac.lcd

Method Filename : 6; IA;1ml;3% IPA in Hex;80 min.lcm  
 Batch Filename : 1.lcb  
 Vial # : 1-51  
 Injection Volume : 10 uL  
 Date Acquired : 11/9/2020 10:40:17 PM  
 Date Processed : 11/10/2020 12:00:19 AM

Sample Type : Unknown  
 Acquired by : System Administrator  
 Processed by : System Administrator

## <Chromatogram>

mAU

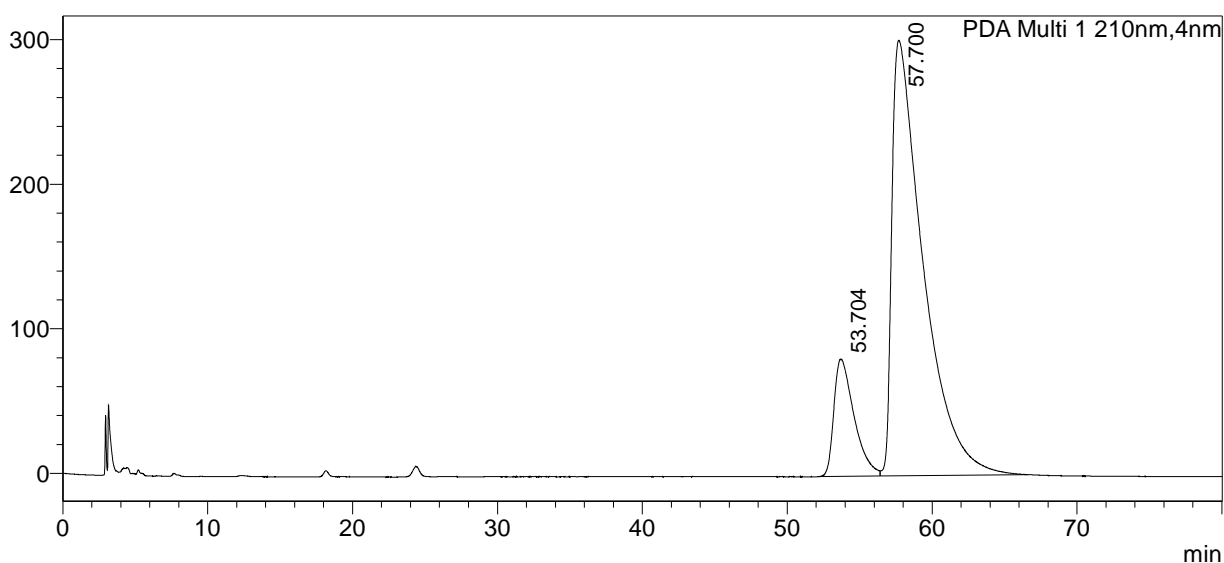

## <Peak Table>

PDA Ch1 210nm

| Peak# | Ret. Time | Area     | Height | Conc.  | Unit | Mark | Name |
|-------|-----------|----------|--------|--------|------|------|------|
| 1     | 53.704    | 7900795  | 81239  | 14.882 |      |      |      |
| 2     | 57.700    | 45190295 | 301192 | 85.118 |      | V    |      |
| Total |           | 53091091 | 382431 |        |      |      |      |



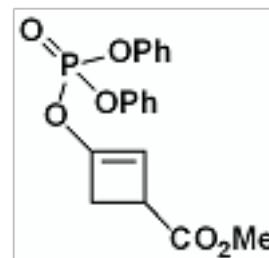

## <Sample Information>

Sample Name : zcx-9-35ac IC  
 Sample ID :  
 Data Filename : zcx-9-35ac IC.lcd

Method Filename : IC,1ml 10%IPA in Hex;40min.lcm  
 Batch Filename : zcx-9-15ac.lcb  
 Vial # : 1-46  
 Injection Volume : 10 uL  
 Date Acquired : 10/28/2020 5:00:19 PM  
 Date Processed : 10/28/2020 5:40:22 PM

Sample Type : Unknown  
 Acquired by : System Administrator  
 Processed by : System Administrator

## <Chromatogram>

mAU

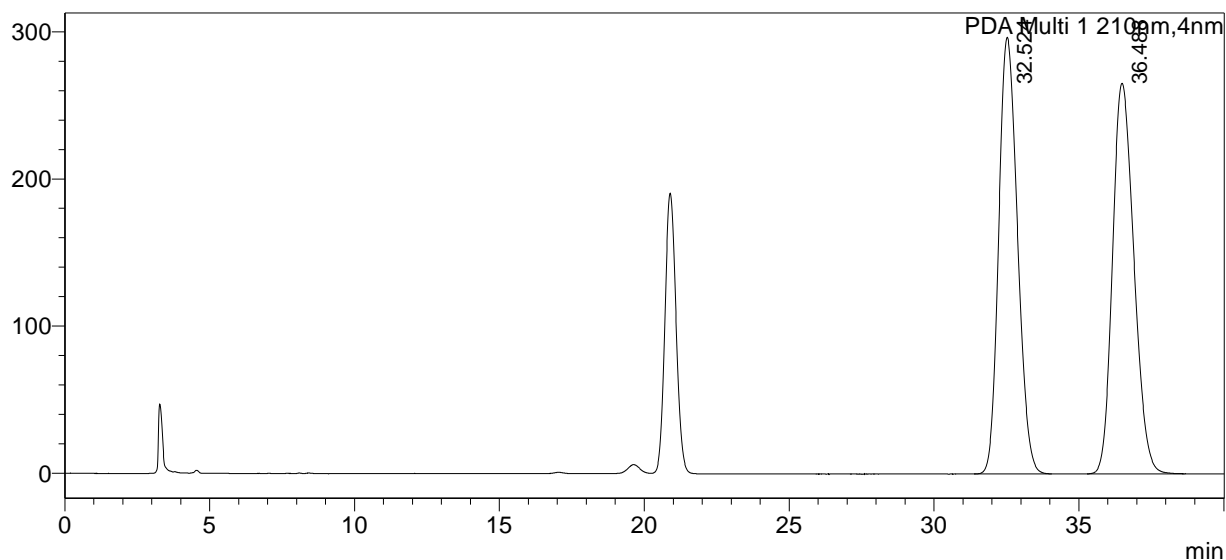

## <Peak Table>

PDA Ch1 210nm

| Peak# | Ret. Time | Area     | Height | Conc.  | Unit | Mark | Name |
|-------|-----------|----------|--------|--------|------|------|------|
| 1     | 32.524    | 13385551 | 296796 | 49.575 |      |      |      |
| 2     | 36.488    | 13614875 | 265569 | 50.425 |      |      |      |
| Total |           | 27000426 | 562366 |        |      |      |      |

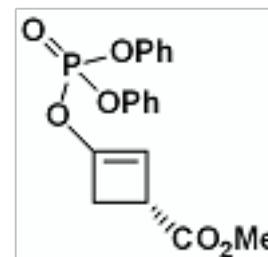

## <Sample Information>

Sample Name : zcx-9-31ac IC  
 Sample ID :  
 Data Filename : zcx-9-31ac IC.lcd

Method Filename : IC,1ml 10%IPA in Hex;40min.lcm  
 Batch Filename : zcx-9-15ac.lcb  
 Vial # : 1-46  
 Injection Volume : 10 uL  
 Date Acquired : 11/6/2015 1:19:00 PM  
 Date Processed : 11/6/2015 1:59:03 PM

Sample Type : Unknown  
 Acquired by : System Administrator  
 Processed by : System Administrator

## <Chromatogram>

mAU

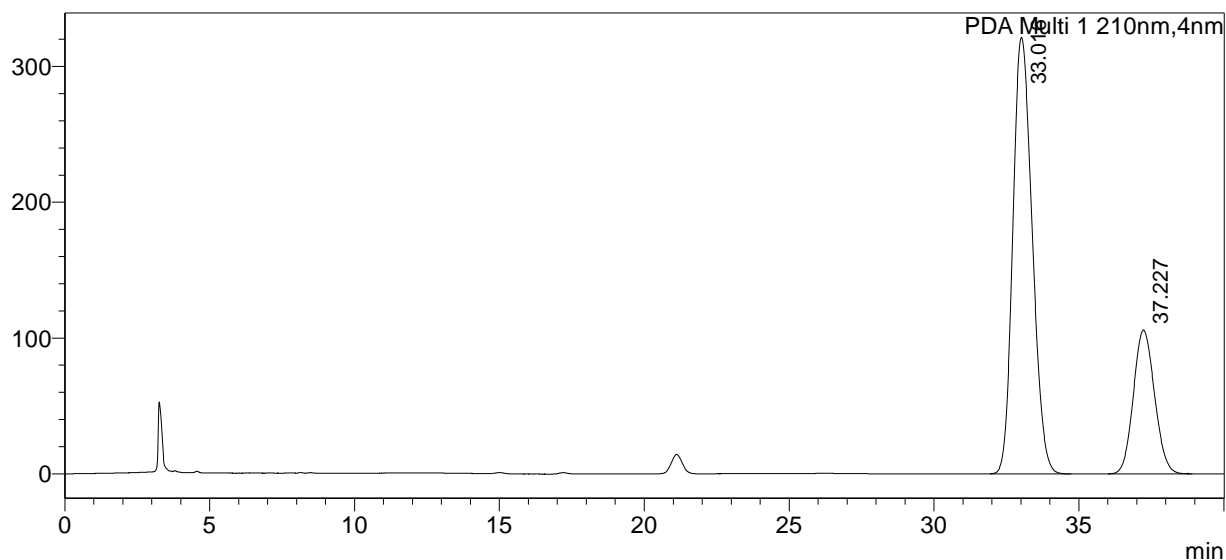

## <Peak Table>

PDA Ch1 210nm

| Peak# | Ret. Time | Area     | Height | Conc.  | Unit | Mark | Name |
|-------|-----------|----------|--------|--------|------|------|------|
| 1     | 33.016    | 14946416 | 321483 | 73.489 |      | SV   |      |
| 2     | 37.227    | 5391822  | 106070 | 26.511 |      | V    |      |
| Total |           | 20338238 | 427553 |        |      |      |      |

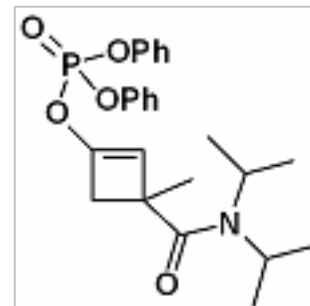

## <Sample Information>

Sample Name : zcx-4-96ac2-1 OZ  
 Sample ID :  
 Data Filename : zcx-4-96ac2-1 OZ.lcd

Method Filename : OZ-H;1 ml; 10% IPA in Hex;40 min.lcm

Batch Filename : zcx-4-96ac2.lcb

Vial # : 1-5

Injection Volume : 10 uL

Date Acquired : 11/7/2018 2:35:17 AM

Date Processed : 11/7/2018 3:15:20 AM

Sample Type : Unknown

Acquired by : System Administrator

Processed by : System Administrator

## <Chromatogram>

mAU

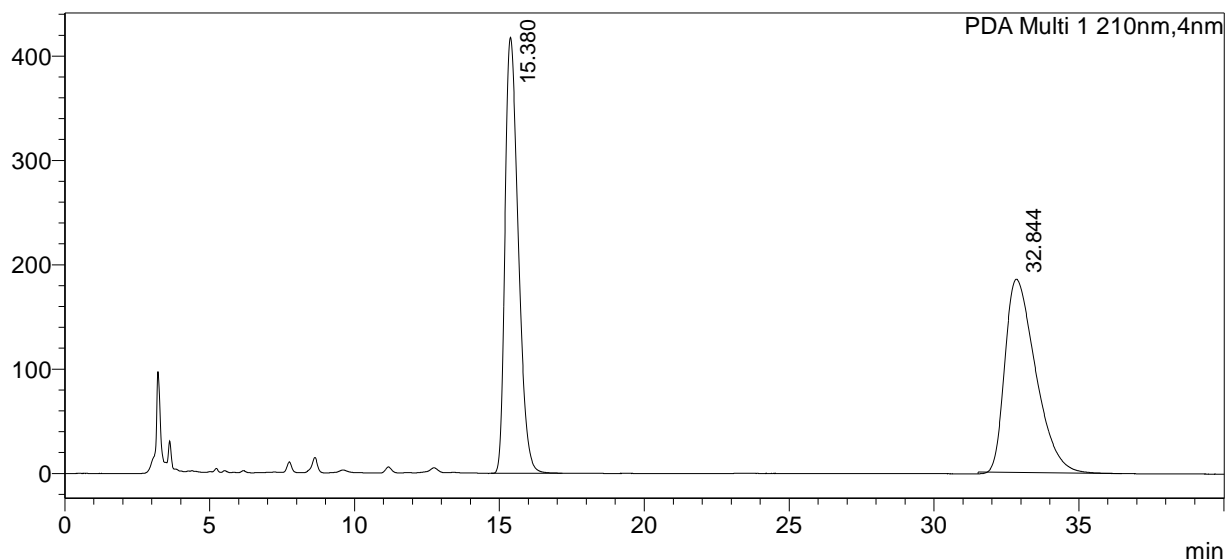

## <Peak Table>

PDA Ch1 210nm

| Peak# | Ret. Time | Area     | Height | Conc.  | Unit | Mark | Name |
|-------|-----------|----------|--------|--------|------|------|------|
| 1     | 15.380    | 13277289 | 417839 | 49.419 |      |      |      |
| 2     | 32.844    | 13589645 | 185204 | 50.581 |      |      |      |
| Total |           | 26866934 | 603043 |        |      |      |      |

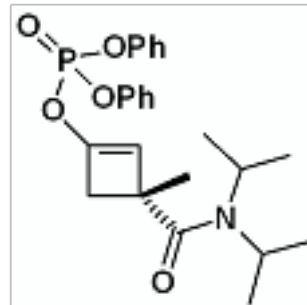

## <Sample Information>

Sample Name : zcx-9-90ac  
 Sample ID :  
 Data Filename : zcx-9-90ac.lcd

Method Filename : OZ-H;1 ml; 10% IPA in Hex;60 min.lcm

Batch Filename : 1.lcb

Vial # : 1-79

Injection Volume : 10 uL

Date Acquired : 11/22/2020 12:34:55 AM

Date Processed : 11/22/2020 1:34:58 AM

Sample Type : Unknown

Acquired by : System Administrator

Processed by : System Administrator

## <Chromatogram>

mAU

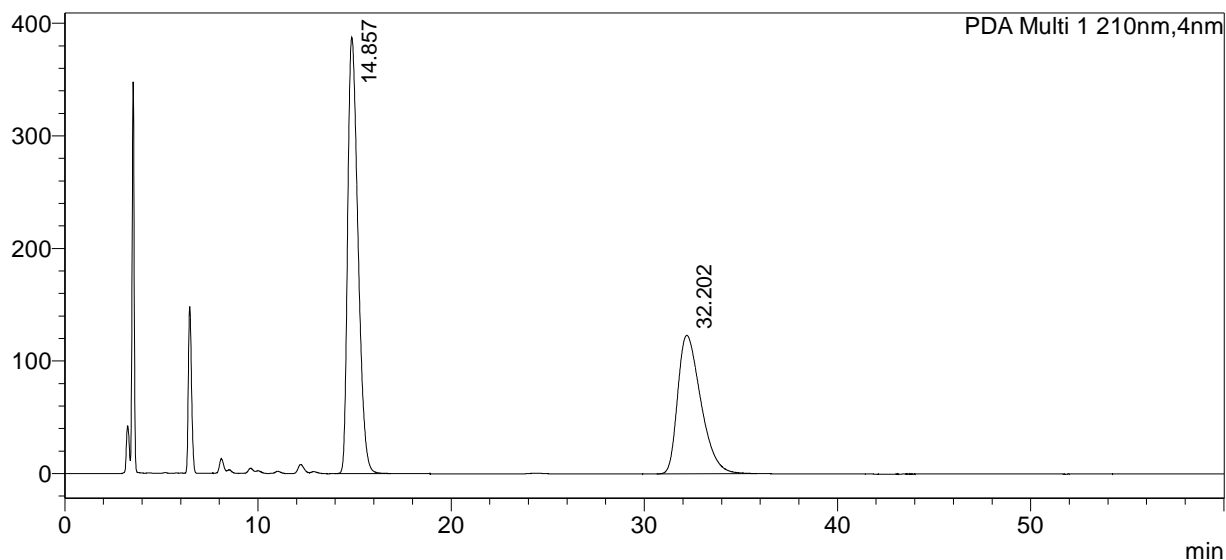

## <Peak Table>

PDA Ch1 210nm

| Peak# | Ret. Time | Area     | Height | Conc.  | Unit | Mark | Name |
|-------|-----------|----------|--------|--------|------|------|------|
| 1     | 14.857    | 14412414 | 387497 | 58.483 |      | S    |      |
| 2     | 32.202    | 10231360 | 123076 | 41.517 |      | S    |      |
| Total |           | 24643774 | 510573 |        |      |      |      |

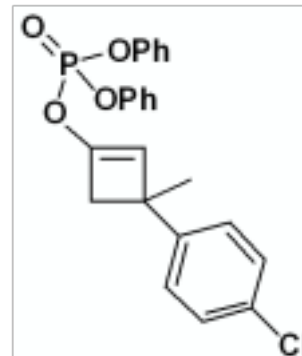

## <Sample Information>

Sample Name : w-1-17-1  
 Sample ID :  
 Data Filename : w-1-17-1.lcd

Method Filename : OJ-H;1 ml; 10% IPA in Hex;40 min.lcm  
 Batch Filename : 1.lcb  
 Vial # : 1-78  
 Injection Volume : 10 uL  
 Date Acquired : 9/2/2020 2:47:45 PM  
 Date Processed : 9/2/2020 3:27:47 PM

Sample Type : Unknown  
 Acquired by : System Administrator  
 Processed by : System Administrator

## <Chromatogram>

mAU

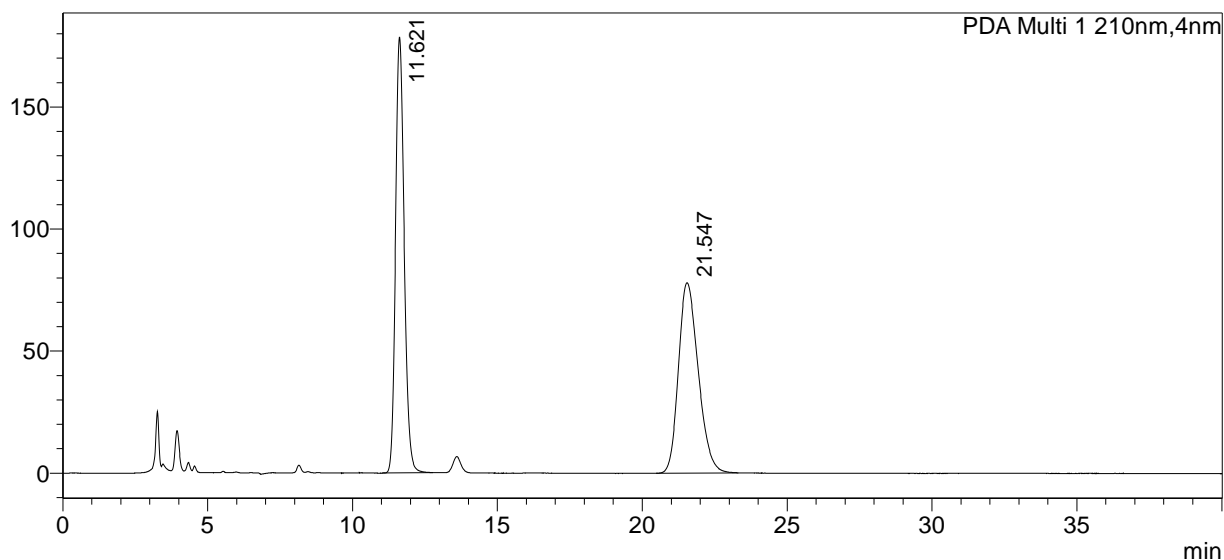

## <Peak Table>

PDA Ch1 210nm

| Peak# | Ret. Time | Area    | Height | Conc.  | Unit | Mark | Name |
|-------|-----------|---------|--------|--------|------|------|------|
| 1     | 11.621    | 3698064 | 178444 | 49.978 |      |      |      |
| 2     | 21.547    | 3701264 | 77985  | 50.022 |      | S    |      |
| Total |           | 7399328 | 256429 |        |      |      |      |

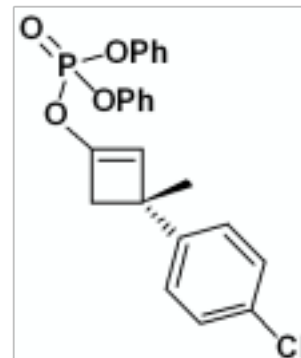

## <Sample Information>

Sample Name : zcx-4-70ac  
 Sample ID :  
 Data Filename : zcx-4-70ac.lcd

Method Filename : OJ-H;1 ml; 10% IPA in Hex;40 min.lcm  
 Batch Filename : 1.lcb  
 Vial # : 1-79  
 Injection Volume : 10 uL  
 Date Acquired : 9/2/2020 3:28:16 PM  
 Date Processed : 9/2/2020 4:08:18 PM

Sample Type : Unknown  
 Acquired by : System Administrator  
 Processed by : System Administrator

## <Chromatogram>

mAU

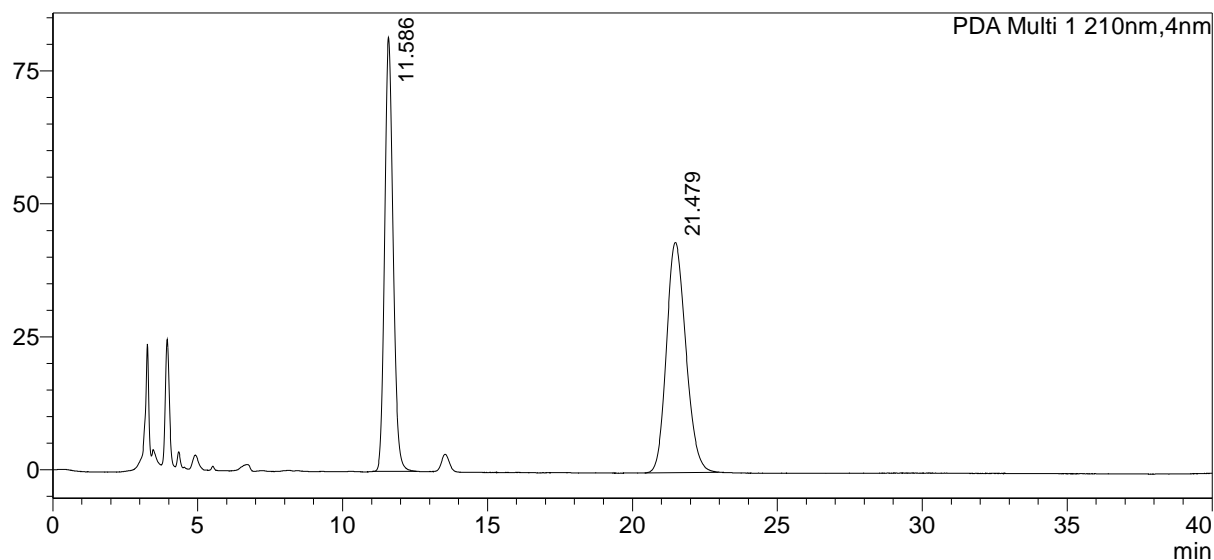

## <Peak Table>

PDA Ch1 210nm

| Peak# | Ret. Time | Area    | Height | Conc.  | Unit | Mark | Name |
|-------|-----------|---------|--------|--------|------|------|------|
| 1     | 11.586    | 1658899 | 81600  | 45.182 |      |      |      |
| 2     | 21.479    | 2012705 | 43303  | 54.818 |      |      |      |
| Total |           | 3671604 | 124903 |        |      |      |      |
